# Supplementary material for: Novel hybrid QSPR-GPR approach for modeling of carbon dioxide capture using deep eutectic solvents
Source: Royal Society of Chemistry journal article supplement (doi:10.1039/d3ra05360a), 2023-01-01
Supplement: d3ra05360a1.xlsx [file d3ra05360a1.xlsx]

## Sheet: Title
	Novel Hybrid QSPR-GPR Approach for Modeling of Carbon Dioxide Capture Using Deep Eutectic Solvents
	Iman Salahshoori1,2 and Alireza Baghban3,*
	1Department of Polymer Processing, Iran Polymer and Petrochemical Institute, P.O. Box 14965-115, Tehran, Iran
	2Department of Chemical Engineering, Science and Research Branch, Islamic Azad University, Tehran, Iran
	3Department of Process Engineering, NISOC Company, Ahvaz, Iran
	*Corresponding author: Alireza_baghban@ut.ac.ir (A. Baghban)

## Sheet: Data
DES	T (K)	P (kPa)	S1	S2	S3	S4	S5	S6	S7	S8	S9	S10	Actual	GPR-Metern	GPR-Exp	GPR-Sexp	GPR-Rational Quadratic							Split	ln(x)-ANN	Leverage	Standadized Residuals
[Ach]Cl-1,2,4-triazole (1 : 1)	303.15	63.7	0.0229	0.369525	1.36967	4.43468	3.93895	1.36715	0.9535	1.4995	2.131	0.028325	-5.7138	-5.80614	-5.86294	-5.79271	-5.85665							Testing	-5.7675	0.00715571	0.895848
[Ach]Cl-1,2,4-triazole (1 : 1)	303.15	107.6	0.0229	0.369525	1.36967	4.43468	3.93895	1.36715	0.9535	1.4995	2.131	0.028325	-5.24	-5.27497	-5.34199	-5.32525	-5.42572							Training	-5.39288	0.00708654	1.28551
[Ach]Cl-1,2,4-triazole (1 : 1)	303.15	192.5	0.0229	0.369525	1.36967	4.43468	3.93895	1.36715	0.9535	1.4995	2.131	0.028325	-4.6777	-4.65688	-4.72213	-4.71194	-4.80913							Testing	-4.81518	0.00696099	1.03908
[Ach]Cl-1,2,4-triazole (1 : 1)	303.15	288.3	0.0229	0.369525	1.36967	4.43468	3.93895	1.36715	0.9535	1.4995	2.131	0.028325	-4.2977	-4.27051	-4.3199	-4.29088	-4.34878							Testing	-4.36167	0.00683232	1.12264
[Ach]Cl-1,2,4-triazole (1 : 1)	303.15	382.9	0.0229	0.369525	1.36967	4.43468	3.93895	1.36715	0.9535	1.4995	2.131	0.028325	-4.0286	-4.01721	-4.05392	-4.021	-4.04725							Testing	-4.0506	0.00671877	1.08074
[Ach]Cl-1,2,4-triazole (1 : 1)	303.15	496.8	0.0229	0.369525	1.36967	4.43468	3.93895	1.36715	0.9535	1.4995	2.131	0.028325	-3.781	-3.77746	-3.81207	-3.79183	-3.80466							Testing	-3.77326	0.00659989	0.853206
[Ach]Cl-1,2,4-triazole (1 : 1)	303.15	587.7	0.0229	0.369525	1.36967	4.43468	3.93895	1.36715	0.9535	1.4995	2.131	0.028325	-3.6231	-3.61083	-3.65363	-3.64862	-3.66788							Training	-3.59015	0.00651898	0.627835
[Ach]Cl-1,2,4-triazole (1 : 1)	313.15	56.3	0.0229	0.369525	1.36967	4.43468	3.93895	1.36715	0.9535	1.4995	2.131	0.028325	-6.0748	-6.10245	-6.12351	-6.05506	-6.06626							Testing	-5.97945	0.00666126	0.689316
[Ach]Cl-1,2,4-triazole (1 : 1)	313.15	101.6	0.0229	0.369525	1.36967	4.43468	3.93895	1.36715	0.9535	1.4995	2.131	0.028325	-5.5215	-5.52242	-5.55481	-5.55943	-5.61209							Testing	-5.58456	0.00658401	1.17755
[Ach]Cl-1,2,4-triazole (1 : 1)	313.15	219.6	0.0229	0.369525	1.36967	4.43468	3.93895	1.36715	0.9535	1.4995	2.131	0.028325	-4.756	-4.7142	-4.73967	-4.7573	-4.79947							Training	-4.81109	0.00639724	1.03323
[Ach]Cl-1,2,4-triazole (1 : 1)	313.15	366.6	0.0229	0.369525	1.36967	4.43468	3.93895	1.36715	0.9535	1.4995	2.131	0.028325	-4.2475	-4.24551	-4.24629	-4.24507	-4.2369							Training	-4.2386	0.0061938	1.18043
[Ach]Cl-1,2,4-triazole (1 : 1)	313.15	444.5	0.0229	0.369525	1.36967	4.43468	3.93895	1.36715	0.9535	1.4995	2.131	0.028325	-4.057	-4.07161	-4.06744	-4.06909	-4.05015							Testing	-4.0321	0.00609915	1.01476
[Ach]Cl-1,2,4-triazole (1 : 1)	313.15	523.9	0.0229	0.369525	1.36967	4.43468	3.93895	1.36715	0.9535	1.4995	2.131	0.028325	-3.8922	-3.91526	-3.91368	-3.92342	-3.90634							Training	-3.8563	0.00601204	0.891483
[Ach]Cl-1,2,4-triazole (1 : 1)	313.15	572.2	0.0229	0.369525	1.36967	4.43468	3.93895	1.36715	0.9535	1.4995	2.131	0.028325	-3.7942	-3.82702	-3.83024	-3.84578	-3.83504							Testing	-3.76002	0.00596368	0.725353
[Ach]Cl-1,2,4-triazole (1 : 1)	323.15	58.4	0.0229	0.369525	1.36967	4.43468	3.93895	1.36715	0.9535	1.4995	2.131	0.028325	-6.2659	-6.25457	-6.25124	-6.19703	-6.17339							Training	-6.13775	0.00633834	0.760895
[Ach]Cl-1,2,4-triazole (1 : 1)	323.15	147.7	0.0229	0.369525	1.36967	4.43468	3.93895	1.36715	0.9535	1.4995	2.131	0.028325	-5.3391	-5.30741	-5.31492	-5.36024	-5.38007							Testing	-5.41758	0.00617858	1.29252
[Ach]Cl-1,2,4-triazole (1 : 1)	323.15	251.5	0.0229	0.369525	1.36967	4.43468	3.93895	1.36715	0.9535	1.4995	2.131	0.028325	-4.8796	-4.77324	-4.76434	-4.79975	-4.79095							Training	-4.83556	0.00600792	0.954008
[Ach]Cl-1,2,4-triazole (1 : 1)	323.15	340.7	0.0229	0.369525	1.36967	4.43468	3.93895	1.36715	0.9535	1.4995	2.131	0.028325	-4.5469	-4.49954	-4.47409	-4.49674	-4.46082							Testing	-4.49594	0.00587418	1.04289
[Ach]Cl-1,2,4-triazole (1 : 1)	323.15	439	0.0229	0.369525	1.36967	4.43468	3.93895	1.36715	0.9535	1.4995	2.131	0.028325	-4.2977	-4.27232	-4.23817	-4.25881	-4.21129							Training	-4.22263	0.00574064	0.984071
[Ach]Cl-1,2,4-triazole (1 : 1)	323.15	542	0.0229	0.369525	1.36967	4.43468	3.93895	1.36715	0.9535	1.4995	2.131	0.028325	-4.0745	-4.07048	-4.04037	-4.06672	-4.0284							Testing	-3.99703	0.00561627	0.721433
[Ach]Cl-1,2,4-triazole (1 : 1)	323.15	593.2	0.0229	0.369525	1.36967	4.43468	3.93895	1.36715	0.9535	1.4995	2.131	0.028325	-3.9846	-3.97844	-3.95449	-3.98432	-3.95684							Testing	-3.89799	0.00556038	0.569544
[Ach]Cl-1,2,4-triazole (1 : 1)	333.15	56.3	0.0229	0.369525	1.36967	4.43468	3.93895	1.36715	0.9535	1.4995	2.131	0.028325	-6.4378	-6.47072	-6.44906	-6.38929	-6.32893							Training	-6.36133	0.00621057	0.902546
[Ach]Cl-1,2,4-triazole (1 : 1)	333.15	116.3	0.0229	0.369525	1.36967	4.43468	3.93895	1.36715	0.9535	1.4995	2.131	0.028325	-5.684	-5.74924	-5.73829	-5.77996	-5.76072							Training	-5.85056	0.00609453	1.6117
[Ach]Cl-1,2,4-triazole (1 : 1)	333.15	186.5	0.0229	0.369525	1.36967	4.43468	3.93895	1.36715	0.9535	1.4995	2.131	0.028325	-5.2785	-5.25125	-5.23455	-5.29483	-5.27141							Training	-5.37562	0.00596562	1.3149
[Ach]Cl-1,2,4-triazole (1 : 1)	333.15	290.9	0.0229	0.369525	1.36967	4.43468	3.93895	1.36715	0.9535	1.4995	2.131	0.028325	-4.8409	-4.82844	-4.79008	-4.83372	-4.7793							Testing	-4.87623	0.00578759	1.14513
[Ach]Cl-1,2,4-triazole (1 : 1)	333.15	396.1	0.0229	0.369525	1.36967	4.43468	3.93895	1.36715	0.9535	1.4995	2.131	0.028325	-4.5564	-4.55448	-4.50008	-4.53242	-4.46094							Training	-4.53742	0.00562475	1.1223
[Ach]Cl-1,2,4-triazole (1 : 1)	333.15	487.4	0.0229	0.369525	1.36967	4.43468	3.93895	1.36715	0.9535	1.4995	2.131	0.028325	-4.3275	-4.363	-4.30638	-4.33727	-4.27068							Testing	-4.31631	0.00549688	0.95249
[Ach]Cl-1,2,4-triazole (1 : 1)	333.15	581	0.0229	0.369525	1.36967	4.43468	3.93895	1.36715	0.9535	1.4995	2.131	0.028325	-4.1541	-4.18812	-4.13988	-4.17209	-4.12616							Testing	-4.12684	0.00537879	0.6958
Thymol-2,6-xylenol (1 : 1)	293.15	3905.7	0.017025	0.4162	0.24805	2.12257	6.3154	5.75355	2.83067	0.621175	0.00725	0	-0.9429	-0.889338	-0.938539	-1.08345	-1.00023							Training	-0.960444	0.0190576	0.361909
Thymol-2,6-xylenol (1 : 1)	293.15	3198.8	0.017025	0.4162	0.24805	2.12257	6.3154	5.75355	2.83067	0.621175	0.00725	0	-1.147	-1.11667	-1.14033	-1.22476	-1.17146							Testing	-1.17023	0.0157893	0.39846
Thymol-2,6-xylenol (1 : 1)	293.15	2593.2	0.017025	0.4162	0.24805	2.12257	6.3154	5.75355	2.83067	0.621175	0.00725	0	-1.3398	-1.31435	-1.33795	-1.37755	-1.32954							Testing	-1.34577	0.013586	0.425035
Thymol-2,6-xylenol (1 : 1)	293.15	1607	0.017025	0.4162	0.24805	2.12257	6.3154	5.75355	2.83067	0.621175	0.00725	0	-1.794	-1.69257	-1.79272	-1.75529	-1.71555							Testing	-1.81911	0.0111762	0.143252
Thymol-2,6-xylenol (1 : 1)	303.15	3984	0.017025	0.4162	0.24805	2.12257	6.3154	5.75355	2.83067	0.621175	0.00725	0	-1.0481	-1.00875	-1.04116	-1.11964	-1.0358							Testing	-1.06154	0.0186854	0.258373
Thymol-2,6-xylenol (1 : 1)	303.15	3256.3	0.017025	0.4162	0.24805	2.12257	6.3154	5.75355	2.83067	0.621175	0.00725	0	-1.2521	-1.24359	-1.24153	-1.26717	-1.25363							Training	-1.26051	0.0153341	0.398193
Thymol-2,6-xylenol (1 : 1)	303.15	2634.4	0.017025	0.4162	0.24805	2.12257	6.3154	5.75355	2.83067	0.621175	0.00725	0	-1.4321	-1.44705	-1.43689	-1.42437	-1.44947							Testing	-1.42786	0.0130999	0.423439
Thymol-2,6-xylenol (1 : 1)	303.15	1630	0.017025	0.4162	0.24805	2.12257	6.3154	5.75355	2.83067	0.621175	0.00725	0	-1.8965	-1.83085	-1.8836	-1.81226	-1.86213							Testing	-1.88083	0.0107176	0.132242
Thymol-2,6-xylenol (1 : 1)	313.15	4044.1	0.017025	0.4162	0.24805	2.12257	6.3154	5.75355	2.83067	0.621175	0.00725	0	-1.1783	-1.13538	-1.14709	-1.1602	-1.06412							Training	-1.15491	0.0183975	0.193881
Thymol-2,6-xylenol (1 : 1)	313.15	3302.9	0.017025	0.4162	0.24805	2.12257	6.3154	5.75355	2.83067	0.621175	0.00725	0	-1.3295	-1.37536	-1.3443	-1.31193	-1.32506							Testing	-1.3368	0.0150135	0.383171
Thymol-2,6-xylenol (1 : 1)	313.15	2669.6	0.017025	0.4162	0.24805	2.12257	6.3154	5.75355	2.83067	0.621175	0.00725	0	-1.5488	-1.58307	-1.53615	-1.4717	-1.56325							Testing	-1.4911	0.0127754	0.369975
Thymol-2,6-xylenol (1 : 1)	313.15	1650	0.017025	0.4162	0.24805	2.12257	6.3154	5.75355	2.83067	0.621175	0.00725	0	-1.9827	-1.97188	-1.97433	-1.86886	-2.02041							Testing	-1.92609	0.010437	0.161361
Thymol-2,6-xylenol (1 : 1)	323.15	4085.3	0.017025	0.4162	0.24805	2.12257	6.3154	5.75355	2.83067	0.621175	0.00725	0	-1.2455	-1.26957	-1.25619	-1.20505	-1.09043							Training	-1.23947	0.0181921	0.2516
Thymol-2,6-xylenol (1 : 1)	323.15	3338	0.017025	0.4162	0.24805	2.12257	6.3154	5.75355	2.83067	0.621175	0.00725	0	-1.4045	-1.51226	-1.44862	-1.35867	-1.38891							Training	-1.4008	0.014827	0.47163
Thymol-2,6-xylenol (1 : 1)	323.15	2698.8	0.017025	0.4162	0.24805	2.12257	6.3154	5.75355	2.83067	0.621175	0.00725	0	-1.6094	-1.72247	-1.63567	-1.51904	-1.66892							Training	-1.53902	0.0126138	0.496922
Thymol-2,6-xylenol (1 : 1)	323.15	1667	0.017025	0.4162	0.24805	2.12257	6.3154	5.75355	2.83067	0.621175	0.00725	0	-2.0691	-2.11569	-2.06496	-1.92508	-2.18585							Testing	-1.95729	0.0103353	0.192362
[Ch]Cl-Urea (1 : 1.5)	313.15	1070	0	0.47619	1.896	3.48228	1.7075	0.90319	0.73165	1.29903	2.26433	0.01547	-2.9759	-3.01164	-2.9309	-2.85193	-3.02461							Testing	-2.77223	0.0104178	1.25281
[Ch]Cl-Urea (1 : 1.5)	313.15	2520	0	0.47619	1.896	3.48228	1.7075	0.90319	0.73165	1.29903	2.26433	0.01547	-2.3434	-2.35488	-2.35642	-2.20172	-2.2796							Training	-2.22181	0.0103402	1.65366
[Ch]Cl-Urea (1 : 1.5)	313.15	4210	0	0.47619	1.896	3.48228	1.7075	0.90319	0.73165	1.29903	2.26433	0.01547	-2.1037	-2.14176	-2.11271	-1.93787	-1.82591							Training	-1.97891	0.0142325	0.872635
[Ch]Cl-Urea (1 : 1.5)	313.15	6090	0	0.47619	1.896	3.48228	1.7075	0.90319	0.73165	1.29903	2.26433	0.01547	-1.8389	-1.85029	-1.89056	-1.76998	-1.84919							Training	-1.85155	0.0235997	-0.000566732
[Ch]Cl-Urea (1 : 1.5)	323.15	850	0	0.47619	1.896	3.48228	1.7075	0.90319	0.73165	1.29903	2.26433	0.01547	-3.4112	-3.48244	-3.45359	-3.24638	-3.31147							Training	-3.23771	0.0103852	1.01821
[Ch]Cl-Urea (1 : 1.5)	323.15	2330	0	0.47619	1.896	3.48228	1.7075	0.90319	0.73165	1.29903	2.26433	0.01547	-2.5383	-2.52815	-2.61384	-2.40767	-2.44917							Training	-2.50562	0.00967311	1.59382
[Ch]Cl-Urea (1 : 1.5)	323.15	3690	0	0.47619	1.896	3.48228	1.7075	0.90319	0.73165	1.29903	2.26433	0.01547	-2.333	-2.35354	-2.33253	-2.14355	-1.99307							Training	-2.23871	0.0119177	0.994639
[Ch]Cl-Urea (1 : 1.5)	323.15	6130	0	0.47619	1.896	3.48228	1.7075	0.90319	0.73165	1.29903	2.26433	0.01547	-1.9379	-1.98943	-1.98222	-1.9174	-1.96431							Training	-1.906	0.0229037	-0.017079
[Ch]Cl-Urea (1 : 1.5)	333.15	1230	0	0.47619	1.896	3.48228	1.7075	0.90319	0.73165	1.29903	2.26433	0.01547	-3.2702	-3.14132	-3.22766	-3.10714	-3.15701							Training	-3.15639	0.00971027	0.990022
[Ch]Cl-Urea (1 : 1.5)	333.15	2590	0	0.47619	1.896	3.48228	1.7075	0.90319	0.73165	1.29903	2.26433	0.01547	-2.6736	-2.63147	-2.64829	-2.48217	-2.43169							Training	-2.7261	0.00954621	1.31603
[Ch]Cl-Urea (1 : 1.5)	333.15	4780	0	0.47619	1.896	3.48228	1.7075	0.90319	0.73165	1.29903	2.26433	0.01547	-2.3228	-2.35165	-2.24902	-2.16015	-1.93122							Testing	-2.11757	0.0151171	0.355189
[Ch]Cl-Urea (1 : 1.5)	333.15	6550	0	0.47619	1.896	3.48228	1.7075	0.90319	0.73165	1.29903	2.26433	0.01547	-2.1037	-2.05941	-2.00438	-2.02471	-2.16999							Training	-1.96787	0.0248803	-0.494584
[Ach]Cl-Imidazole (2 : 3)	303.15	30.2	0.00063	0.37779	1.06212	4.33936	3.25325	1.84092	1.21947	1.14857	1.71297	0.13784	-7.1309	-6.4403	-6.47756	-6.38082	-6.22846							Training	-6.30353	0.00613633	-1.98144
[Ach]Cl-Imidazole (2 : 3)	303.15	86.7	0.00063	0.37779	1.06212	4.33936	3.25325	1.84092	1.21947	1.14857	1.71297	0.13784	-5.4727	-5.60698	-5.64648	-5.64095	-5.60803							Training	-5.7494	0.00610592	0.92869
[Ach]Cl-Imidazole (2 : 3)	303.15	198.4	0.00063	0.37779	1.06212	4.33936	3.25325	1.84092	1.21947	1.14857	1.71297	0.13784	-4.646	-4.74938	-4.77807	-4.77088	-4.77475							Training	-4.89249	0.00605991	0.885521
[Ach]Cl-Imidazole (2 : 3)	303.15	300.3	0.00063	0.37779	1.06212	4.33936	3.25325	1.84092	1.21947	1.14857	1.71297	0.13784	-4.2904	-4.34784	-4.36438	-4.33645	-4.30394							Testing	-4.38756	0.00603428	0.876086
[Ach]Cl-Imidazole (2 : 3)	303.15	388.1	0.00063	0.37779	1.06212	4.33936	3.25325	1.84092	1.21947	1.14857	1.71297	0.13784	-4.0513	-4.10755	-4.1235	-4.09136	-4.02981							Training	-4.10032	0.00602469	0.865414
[Ach]Cl-Imidazole (2 : 3)	303.15	486.8	0.00063	0.37779	1.06212	4.33936	3.25325	1.84092	1.21947	1.14857	1.71297	0.13784	-3.8397	-3.88792	-3.91769	-3.88695	-3.8106							Training	-3.87074	0.00602773	0.6573
[Ach]Cl-Imidazole (2 : 3)	303.15	572.6	0.00063	0.37779	1.06212	4.33936	3.25325	1.84092	1.21947	1.14857	1.71297	0.13784	-3.6809	-3.72238	-3.77508	-3.74215	-3.66846							Training	-3.71328	0.00604225	0.416936
[Ach]Cl-Imidazole (2 : 3)	313.15	65.21	0.00063	0.37779	1.06212	4.33936	3.25325	1.84092	1.21947	1.14857	1.71297	0.13784	-5.9522	-6.03894	-6.03355	-6.05249	-5.99455							Training	-6.07113	0.00537332	0.68985
[Ach]Cl-Imidazole (2 : 3)	313.15	147.7	0.00063	0.37779	1.06212	4.33936	3.25325	1.84092	1.21947	1.14857	1.71297	0.13784	-5.2591	-5.21696	-5.21094	-5.2626	-5.27955							Training	-5.36217	0.00532498	0.853236
[Ach]Cl-Imidazole (2 : 3)	313.15	201.4	0.00063	0.37779	1.06212	4.33936	3.25325	1.84092	1.21947	1.14857	1.71297	0.13784	-4.9618	-4.89705	-4.88661	-4.92464	-4.94087							Training	-5.00024	0.00529901	0.595716
[Ach]Cl-Imidazole (2 : 3)	313.15	295.9	0.00063	0.37779	1.06212	4.33936	3.25325	1.84092	1.21947	1.14857	1.71297	0.13784	-4.5756	-4.52399	-4.50843	-4.52192	-4.50858							Training	-4.53475	0.00526381	0.729505
[Ach]Cl-Imidazole (2 : 3)	313.15	427.6	0.00063	0.37779	1.06212	4.33936	3.25325	1.84092	1.21947	1.14857	1.71297	0.13784	-4.1734	-4.17561	-4.17484	-4.17356	-4.12533							Testing	-4.1324	0.00523712	0.684835
[Ach]Cl-Imidazole (2 : 3)	313.15	547.6	0.00063	0.37779	1.06212	4.33936	3.25325	1.84092	1.21947	1.14857	1.71297	0.13784	-3.907	-3.92667	-3.96463	-3.95246	-3.90052							Training	-3.8899	0.00523546	0.503766
[Ach]Cl-Imidazole (2 : 3)	323.15	29.8	0.00063	0.37779	1.06212	4.33936	3.25325	1.84092	1.21947	1.14857	1.71297	0.13784	-6.5023	-6.7731	-6.72652	-6.69418	-6.5676							Testing	-6.56157	0.00484519	0.486662
[Ach]Cl-Imidazole (2 : 3)	323.15	111	0.00063	0.37779	1.06212	4.33936	3.25325	1.84092	1.21947	1.14857	1.71297	0.13784	-5.5215	-5.68187	-5.64502	-5.72402	-5.74399							Training	-5.79654	0.00478349	1.39975
[Ach]Cl-Imidazole (2 : 3)	323.15	148.6	0.00063	0.37779	1.06212	4.33936	3.25325	1.84092	1.21947	1.14857	1.71297	0.13784	-5.3185	-5.37543	-5.33968	-5.41758	-5.45709							Testing	-5.49855	0.00475827	1.14761
[Ach]Cl-Imidazole (2 : 3)	323.15	238.5	0.00063	0.37779	1.06212	4.33936	3.25325	1.84092	1.21947	1.14857	1.71297	0.13784	-4.8929	-4.89463	-4.85927	-4.90554	-4.94071							Testing	-4.94083	0.00470658	0.780972
[Ach]Cl-Imidazole (2 : 3)	323.15	329.1	0.00063	0.37779	1.06212	4.33936	3.25325	1.84092	1.21947	1.14857	1.71297	0.13784	-4.5952	-4.58825	-4.56054	-4.57788	-4.58823							Testing	-4.56171	0.00466675	0.833521
[Ach]Cl-Imidazole (2 : 3)	323.15	425.7	0.00063	0.37779	1.06212	4.33936	3.25325	1.84092	1.21947	1.14857	1.71297	0.13784	-4.3428	-4.34261	-4.33825	-4.33596	-4.32821							Testing	-4.28755	0.00463786	0.738844
[Ach]Cl-Imidazole (2 : 3)	323.15	529.8	0.00063	0.37779	1.06212	4.33936	3.25325	1.84092	1.21947	1.14857	1.71297	0.13784	-4.1352	-4.12152	-4.1585	-4.13895	-4.1299							Training	-4.07242	0.00462241	0.533952
[Ach]Cl-Imidazole (2 : 3)	323.15	589.2	0.00063	0.37779	1.06212	4.33936	3.25325	1.84092	1.21947	1.14857	1.71297	0.13784	-4.0342	-4.00868	-4.07394	-4.04324	-4.04124							Testing	-3.9686	0.00462089	0.303685
[Ach]Cl-Imidazole (2 : 3)	333.15	33	0.00063	0.37779	1.06212	4.33936	3.25325	1.84092	1.21947	1.14857	1.71297	0.13784	-6.8124	-6.88012	-6.81093	-6.79889	-6.70321							Testing	-6.68444	0.00447755	0.212249
[Ach]Cl-Imidazole (2 : 3)	333.15	92.3	0.00063	0.37779	1.06212	4.33936	3.25325	1.84092	1.21947	1.14857	1.71297	0.13784	-5.9915	-6.03817	-5.98241	-6.06612	-6.08955							Testing	-6.11716	0.00442469	1.0753
[Ach]Cl-Imidazole (2 : 3)	333.15	141.7	0.00063	0.37779	1.06212	4.33936	3.25325	1.84092	1.21947	1.14857	1.71297	0.13784	-5.6268	-5.59263	-5.54381	-5.63235	-5.69463							Training	-5.71049	0.00438469	1.11222
[Ach]Cl-Imidazole (2 : 3)	333.15	235.4	0.00063	0.37779	1.06212	4.33936	3.25325	1.84092	1.21947	1.14857	1.71297	0.13784	-5.116	-5.07453	-5.03477	-5.08194	-5.15166							Training	-5.11994	0.00431887	0.769987
[Ach]Cl-Imidazole (2 : 3)	333.15	346.1	0.00063	0.37779	1.06212	4.33936	3.25325	1.84092	1.21947	1.14857	1.71297	0.13784	-4.7444	-4.707	-4.68632	-4.68631	-4.73784							Training	-4.6707	0.0042581	0.85405
[Ach]Cl-Imidazole (2 : 3)	333.15	441.6	0.00063	0.37779	1.06212	4.33936	3.25325	1.84092	1.21947	1.14857	1.71297	0.13784	-4.5099	-4.47128	-4.48046	-4.45453	-4.49963							Training	-4.41563	0.00422046	0.72305
[Ach]Cl-Imidazole (2 : 3)	333.15	536.3	0.00063	0.37779	1.06212	4.33936	3.25325	1.84092	1.21947	1.14857	1.71297	0.13784	-4.3125	-4.27142	-4.31968	-4.27573	-4.32845							Training	-4.22437	0.00419664	0.510072
[Ach]Cl-Imidazole (2 : 3)	333.15	594	0.00063	0.37779	1.06212	4.33936	3.25325	1.84092	1.21947	1.14857	1.71297	0.13784	-4.1997	-4.16115	-4.23525	-4.18171	-4.24504							Testing	-4.12329	0.00418873	0.319589
[TOA]Cl-DecA (1 : 1.5)	298.15	90	0.02955	0.31167	0.33528	3.03883	21.3422	13.4156	1.01635	1.19102	1.32186	0.16984	-4.0864	-4.12321	-4.16089	-4.10087	-4.12684							Testing	-4.1081	0.0126384	0.123074
[TOA]Cl-DecA (1 : 1.5)	298.15	190	0.02955	0.31167	0.33528	3.03883	21.3422	13.4156	1.01635	1.19102	1.32186	0.16984	-3.3581	-3.3872	-3.42771	-3.36423	-3.42745							Testing	-3.40097	0.0125902	0.057815
[TOA]Cl-DecA (1 : 1.5)	298.15	290	0.02955	0.31167	0.33528	3.03883	21.3422	13.4156	1.01635	1.19102	1.32186	0.16984	-2.9779	-2.98378	-3.02025	-2.95026	-2.97293							Training	-2.94288	0.012557	-0.175481
[TOA]Cl-DecA (1 : 1.5)	298.15	390	0.02955	0.31167	0.33528	3.03883	21.3422	13.4156	1.01635	1.19102	1.32186	0.16984	-2.6853	-2.71108	-2.74279	-2.68768	-2.66499							Training	-2.65545	0.0125388	-0.201408
[TOA]Cl-DecA (1 : 1.5)	298.15	490	0.02955	0.31167	0.33528	3.03883	21.3422	13.4156	1.01635	1.19102	1.32186	0.16984	-2.4663	-2.49777	-2.52699	-2.49715	-2.44503							Training	-2.46205	0.0125356	-0.401355
[TOA]Cl-DecA (1 : 1.5)	298.15	790	0.02955	0.31167	0.33528	3.03883	21.3422	13.4156	1.01635	1.19102	1.32186	0.16984	-2.0032	-2.03254	-2.06028	-2.08576	-2.02921							Training	-2.06958	0.012616	-1.05362
[TOA]Cl-DecA (1 : 1.5)	298.15	990	0.02955	0.31167	0.33528	3.03883	21.3422	13.4156	1.01635	1.19102	1.32186	0.16984	-1.8042	-1.82002	-1.84145	-1.87001	-1.83389							Testing	-1.85336	0.0127447	-0.763958
[TOA]Cl-DecA (1 : 1.5)	298.15	1490	0.02955	0.31167	0.33528	3.03883	21.3422	13.4156	1.01635	1.19102	1.32186	0.16984	-1.4486	-1.4786	-1.48365	-1.4633	-1.42866							Training	-1.4596	0.0133292	-0.300566
[TOA]Cl-DecA (1 : 1.5)	298.15	1990	0.02955	0.31167	0.33528	3.03883	21.3422	13.4156	1.01635	1.19102	1.32186	0.16984	-1.2056	-1.19001	-1.2783	-1.1955	-1.08022							Testing	-1.26678	0.0142889	-0.158243
[TOA]Cl-DecA (1 : 1.5)	308.15	90	0.02955	0.31167	0.33528	3.03883	21.3422	13.4156	1.01635	1.19102	1.32186	0.16984	-4.2064	-4.19492	-4.1869	-4.20138	-4.21928							Testing	-4.20448	0.0123678	0.345426
[TOA]Cl-DecA (1 : 1.5)	308.15	190	0.02955	0.31167	0.33528	3.03883	21.3422	13.4156	1.01635	1.19102	1.32186	0.16984	-3.4933	-3.46029	-3.45338	-3.46882	-3.52299							Training	-3.49897	0.0123076	0.286485
[TOA]Cl-DecA (1 : 1.5)	308.15	290	0.02955	0.31167	0.33528	3.03883	21.3422	13.4156	1.01635	1.19102	1.32186	0.16984	-3.0857	-3.05751	-3.04519	-3.05394	-3.06852							Testing	-3.04163	0.0122624	-0.0245367
[TOA]Cl-DecA (1 : 1.5)	308.15	390	0.02955	0.31167	0.33528	3.03883	21.3422	13.4156	1.01635	1.19102	1.32186	0.16984	-2.792	-2.78503	-2.76694	-2.7885	-2.75882							Training	-2.75398	0.0122322	-0.0117056
[TOA]Cl-DecA (1 : 1.5)	308.15	490	0.02955	0.31167	0.33528	3.03883	21.3422	13.4156	1.01635	1.19102	1.32186	0.16984	-2.5783	-2.57172	-2.55037	-2.59428	-2.53607							Testing	-2.55972	0.012217	-0.255714
[TOA]Cl-DecA (1 : 1.5)	308.15	690	0.02955	0.31167	0.33528	3.03883	21.3422	13.4156	1.01635	1.19102	1.32186	0.16984	-2.2538	-2.23922	-2.21582	-2.29638	-2.22768							Training	-2.2827	0.0122316	-0.89244
[TOA]Cl-DecA (1 : 1.5)	308.15	790	0.02955	0.31167	0.33528	3.03883	21.3422	13.4156	1.01635	1.19102	1.32186	0.16984	-2.1337	-2.10709	-2.0818	-2.16986	-2.10937							Training	-2.16465	0.0122615	-1.11271
[TOA]Cl-DecA (1 : 1.5)	308.15	990	0.02955	0.31167	0.33528	3.03883	21.3422	13.4156	1.01635	1.19102	1.32186	0.16984	-1.9324	-1.89682	-1.86204	-1.94519	-1.9063							Training	-1.94863	0.0123662	-0.796256
[TOA]Cl-DecA (1 : 1.5)	308.15	1190	0.02955	0.31167	0.33528	3.03883	21.3422	13.4156	1.01635	1.19102	1.32186	0.16984	-1.7702	-1.74217	-1.69197	-1.75364	-1.7272							Training	-1.76366	0.012531	-0.572247
[TOA]Cl-DecA (1 : 1.5)	308.15	1490	0.02955	0.31167	0.33528	3.03883	21.3422	13.4156	1.01635	1.19102	1.32186	0.16984	-1.5721	-1.57233	-1.50275	-1.5215	-1.48256							Training	-1.55593	0.0128907	-0.343106
[TOA]Cl-DecA (1 : 1.5)	308.15	1790	0.02955	0.31167	0.33528	3.03883	21.3422	13.4156	1.01635	1.19102	1.32186	0.16984	-1.4159	-1.42711	-1.36707	-1.34195	-1.25798							Training	-1.4189	0.0133855	-0.213035
[TOA]Cl-DecA (1 : 1.5)	308.15	1990	0.02955	0.31167	0.33528	3.03883	21.3422	13.4156	1.01635	1.19102	1.32186	0.16984	-1.3295	-1.32164	-1.29668	-1.24329	-1.11777							Training	-1.35239	0.0137905	-0.168249
[Ch]Cl-EG (1 : 2)	303.15	236	0	0.258588	1.09617	3.85012	2.89392	0.776026	0.72151	1.1821	1.88577	0.001292	-4.6831	-4.63613	-4.75376	-4.5764	-4.81713							Training	-4.7406	0.00370956	0.655725
[Ch]Cl-EG (1 : 2)	303.15	537	0	0.258588	1.09617	3.85012	2.89392	0.776026	0.72151	1.1821	1.88577	0.001292	-3.8281	-3.81975	-3.85795	-3.79383	-3.88751							Training	-3.85873	0.00331935	0.516859
[Ch]Cl-EG (1 : 2)	303.15	1004	0	0.258588	1.09617	3.85012	2.89392	0.776026	0.72151	1.1821	1.88577	0.001292	-3.2048	-3.16043	-3.1363	-3.23118	-3.28727							Training	-3.17792	0.00298312	-0.284382
[Ch]Cl-EG (1 : 2)	303.15	1923	0	0.258588	1.09617	3.85012	2.89392	0.776026	0.72151	1.1821	1.88577	0.001292	-2.552	-2.59805	-2.50318	-2.58134	-2.55533							Training	-2.54401	0.00327746	0.526207
[Ch]Cl-EG (1 : 2)	303.15	2760	0	0.258588	1.09617	3.85012	2.89392	0.776026	0.72151	1.1821	1.88577	0.001292	-2.1949	-2.23768	-2.25755	-2.23399	-2.13739							Training	-2.23151	0.00464866	0.703032
[Ch]Cl-EG (1 : 2)	303.15	3849	0	0.258588	1.09617	3.85012	2.89392	0.776026	0.72151	1.1821	1.88577	0.001292	-1.8938	-1.87103	-1.89903	-1.93366	-1.91387							Training	-1.89057	0.00800689	0.546481
[Ch]Cl-EG (1 : 2)	303.15	4971	0	0.258588	1.09617	3.85012	2.89392	0.776026	0.72151	1.1821	1.88577	0.001292	-1.6543	-1.65016	-1.64504	-1.70816	-1.85301							Training	-1.59865	0.0133288	0.217964
[Ch]Cl-EG (1 : 2)	303.15	5863	0	0.258588	1.09617	3.85012	2.89392	0.776026	0.72151	1.1821	1.88577	0.001292	-1.5343	-1.54759	-1.52762	-1.55975	-1.80655							Testing	-1.39064	0.0189081	-0.241489
[Ch]Cl-EG (1 : 2)	313.15	248	0	0.258588	1.09617	3.85012	2.89392	0.776026	0.72151	1.1821	1.88577	0.001292	-4.8549	-4.82662	-4.92418	-4.78363	-4.93982							Testing	-4.85956	0.00402163	0.557564
[Ch]Cl-EG (1 : 2)	313.15	565	0	0.258588	1.09617	3.85012	2.89392	0.776026	0.72151	1.1821	1.88577	0.001292	-4.0065	-4.00205	-4.02351	-4.00275	-4.02363							Testing	-3.99638	0.0035822	0.293538
[Ch]Cl-EG (1 : 2)	313.15	1055	0	0.258588	1.09617	3.85012	2.89392	0.776026	0.72151	1.1821	1.88577	0.001292	-3.3692	-3.33489	-3.30223	-3.41701	-3.42062							Testing	-3.34099	0.00319975	-0.491117
[Ch]Cl-EG (1 : 2)	313.15	1928	0	0.258588	1.09617	3.85012	2.89392	0.776026	0.72151	1.1821	1.88577	0.001292	-2.7693	-2.80824	-2.72039	-2.79211	-2.73133							Testing	-2.76792	0.00341142	0.216907
[Ch]Cl-EG (1 : 2)	313.15	2782	0	0.258588	1.09617	3.85012	2.89392	0.776026	0.72151	1.1821	1.88577	0.001292	-2.4006	-2.4363	-2.47003	-2.43076	-2.31466							Testing	-2.42667	0.00472542	0.40386
[Ch]Cl-EG (1 : 2)	313.15	3889	0	0.258588	1.09617	3.85012	2.89392	0.776026	0.72151	1.1821	1.88577	0.001292	-2.0676	-2.06266	-2.07678	-2.12235	-2.08179							Training	-2.08152	0.00805799	0.35311
[Ch]Cl-EG (1 : 2)	313.15	5040	0	0.258588	1.09617	3.85012	2.89392	0.776026	0.72151	1.1821	1.88577	0.001292	-1.8175	-1.83841	-1.84762	-1.89171	-1.96594							Training	-1.82303	0.0134736	0.0265289
[Ch]Cl-EG (1 : 2)	313.15	5902	0	0.258588	1.09617	3.85012	2.89392	0.776026	0.72151	1.1821	1.88577	0.001292	-1.6773	-1.73999	-1.73148	-1.75123	-1.88727							Training	-1.6454	0.0188319	-0.329424
[Ch]Cl-EG (1 : 2)	323.15	306	0	0.258588	1.09617	3.85012	2.89392	0.776026	0.72151	1.1821	1.88577	0.001292	-4.8571	-4.86134	-4.92493	-4.81684	-4.88104							Training	-4.81891	0.0044406	0.625859
[Ch]Cl-EG (1 : 2)	323.15	603	0	0.258588	1.09617	3.85012	2.89392	0.776026	0.72151	1.1821	1.88577	0.001292	-4.1613	-4.17127	-4.17571	-4.18414	-4.15447							Testing	-4.13472	0.0040147	0.100627
[Ch]Cl-EG (1 : 2)	323.15	1092	0	0.258588	1.09617	3.85012	2.89392	0.776026	0.72151	1.1821	1.88577	0.001292	-3.5624	-3.52752	-3.48881	-3.60208	-3.57829							Training	-3.53215	0.00360194	-0.701147
[Ch]Cl-EG (1 : 2)	323.15	1950	0	0.258588	1.09617	3.85012	2.89392	0.776026	0.72151	1.1821	1.88577	0.001292	-2.9899	-3.01397	-2.93384	-2.98069	-2.9113							Testing	-2.98944	0.00374514	-0.0670789
[Ch]Cl-EG (1 : 2)	323.15	2833	0	0.258588	1.09617	3.85012	2.89392	0.776026	0.72151	1.1821	1.88577	0.001292	-2.6063	-2.62593	-2.67874	-2.60483	-2.49497							Training	-2.62267	0.00504631	0.171024
[Ch]Cl-EG (1 : 2)	323.15	3948	0	0.258588	1.09617	3.85012	2.89392	0.776026	0.72151	1.1821	1.88577	0.001292	-2.2611	-2.25185	-2.25608	-2.29363	-2.23967							Training	-2.28446	0.00836139	0.0980083
[Ch]Cl-EG (1 : 2)	323.15	5110	0	0.258588	1.09617	3.85012	2.89392	0.776026	0.72151	1.1821	1.88577	0.001292	-2.0188	-2.02876	-2.05126	-2.06079	-2.06503							Training	-2.05956	0.013802	-0.255788
[Ch]Cl-EG (1 : 2)	323.15	6167	0	0.258588	1.09617	3.85012	2.89392	0.776026	0.72151	1.1821	1.88577	0.001292	-1.8234	-1.91423	-1.90419	-1.89375	-1.93808							Training	-1.85815	0.0205115	-0.636738
[Ch]Cl-EG (1 : 2)	333.15	332	0	0.258588	1.09617	3.85012	2.89392	0.776026	0.72151	1.1821	1.88577	0.001292	-4.9867	-5.03038	-5.06716	-4.97378	-4.98572							Training	-4.93497	0.00509291	0.5748
[Ch]Cl-EG (1 : 2)	333.15	637	0	0.258588	1.09617	3.85012	2.89392	0.776026	0.72151	1.1821	1.88577	0.001292	-4.322	-4.35363	-4.34075	-4.36038	-4.3051							Testing	-4.29375	0.00463272	-0.0778142
[Ch]Cl-EG (1 : 2)	333.15	1094	0	0.258588	1.09617	3.85012	2.89392	0.776026	0.72151	1.1821	1.88577	0.001292	-3.7839	-3.75639	-3.71331	-3.80837	-3.78108							Training	-3.75932	0.00420455	-0.976995
[Ch]Cl-EG (1 : 2)	333.15	1948	0	0.258588	1.09617	3.85012	2.89392	0.776026	0.72151	1.1821	1.88577	0.001292	-3.1995	-3.23438	-3.15822	-3.16979	-3.1216							Training	-3.21992	0.00424473	-0.276296
[Ch]Cl-EG (1 : 2)	333.15	2831	0	0.258588	1.09617	3.85012	2.89392	0.776026	0.72151	1.1821	1.88577	0.001292	-2.8406	-2.84023	-2.89973	-2.7852	-2.70189							Training	-2.83955	0.00543743	-0.131899
[Ch]Cl-EG (1 : 2)	333.15	3944	0	0.258588	1.09617	3.85012	2.89392	0.776026	0.72151	1.1821	1.88577	0.001292	-2.5396	-2.45999	-2.4662	-2.46806	-2.39894							Training	-2.50338	0.00860816	-0.307827
[Ch]Cl-EG (1 : 2)	333.15	5188	0	0.258588	1.09617	3.85012	2.89392	0.776026	0.72151	1.1821	1.88577	0.001292	-2.2286	-2.22025	-2.25298	-2.21578	-2.15148							Training	-2.29053	0.0143527	-0.564583
[Ch]Cl-EG (1 : 2)	333.15	6104	0	0.258588	1.09617	3.85012	2.89392	0.776026	0.72151	1.1821	1.88577	0.001292	-2.1026	-2.11937	-2.12183	-2.07053	-2.01576							Testing	-2.12827	0.0200677	-1.01354
[Ch]Cl-EG (1 : 2)	343.15	378	0	0.258588	1.09617	3.85012	2.89392	0.776026	0.72151	1.1821	1.88577	0.001292	-5.0743	-5.15553	-5.15677	-5.07497	-5.04871							Testing	-5.01044	0.00589129	0.434157
[Ch]Cl-EG (1 : 2)	343.15	659	0	0.258588	1.09617	3.85012	2.89392	0.776026	0.72151	1.1821	1.88577	0.001292	-4.5193	-4.56233	-4.52961	-4.54359	-4.48653							Testing	-4.47472	0.00544797	-0.256654
[Ch]Cl-EG (1 : 2)	343.15	1113	0	0.258588	1.09617	3.85012	2.89392	0.776026	0.72151	1.1821	1.88577	0.001292	-4.0051	-3.97386	-3.9205	-3.98627	-3.98099							Testing	-3.96475	0.00498218	-1.27678
[Ch]Cl-EG (1 : 2)	343.15	1960	0	0.258588	1.09617	3.85012	2.89392	0.776026	0.72151	1.1821	1.88577	0.001292	-3.4576	-3.45199	-3.37636	-3.33951	-3.33798							Training	-3.43116	0.00494022	-0.646656
[Ch]Cl-EG (1 : 2)	343.15	2862	0	0.258588	1.09617	3.85012	2.89392	0.776026	0.72151	1.1821	1.88577	0.001292	-3.0788	-3.04406	-3.11217	-2.94311	-2.9007							Testing	-3.03193	0.00607959	-0.497058
[Ch]Cl-EG (1 : 2)	343.15	4024	0	0.258588	1.09617	3.85012	2.89392	0.776026	0.72151	1.1821	1.88577	0.001292	-2.7417	-2.64883	-2.65194	-2.61227	-2.52784							Training	-2.69089	0.00934746	-0.60001
[Ch]Cl-EG (1 : 2)	343.15	5267	0	0.258588	1.09617	3.85012	2.89392	0.776026	0.72151	1.1821	1.88577	0.001292	-2.4796	-2.41387	-2.45182	-2.35933	-2.22859							Testing	-2.50492	0.0150868	-0.98845
[Ch]Cl-EG (1 : 2)	343.15	6323	0	0.258588	1.09617	3.85012	2.89392	0.776026	0.72151	1.1821	1.88577	0.001292	-2.3367	-2.30195	-2.29457	-2.19434	-2.05549							Training	-2.3231	0.0217848	-1.47587
[TOA]Br-DecA (1 : 2)	298.15	90	0.032505	0.342837	0.357628	2.86089	20.0166	12.4257	1.00395	1.4713	1.30073	0	-4.1734	-4.1456	-4.1744	-4.14977	-4.14763							Training	-4.19528	0.0096324	0.111849
[TOA]Br-DecA (1 : 2)	298.15	190	0.032505	0.342837	0.357628	2.86089	20.0166	12.4257	1.00395	1.4713	1.30073	0	-3.4389	-3.43216	-3.48948	-3.42045	-3.44261							Testing	-3.52431	0.00946681	0.0228383
[TOA]Br-DecA (1 : 2)	298.15	290	0.032505	0.342837	0.357628	2.86089	20.0166	12.4257	1.00395	1.4713	1.30073	0	-3.02	-3.03293	-3.08575	-2.99471	-2.99466							Testing	-3.08004	0.00931623	-0.127367
[TOA]Br-DecA (1 : 2)	298.15	390	0.032505	0.342837	0.357628	2.86089	20.0166	12.4257	1.00395	1.4713	1.30073	0	-2.7426	-2.7607	-2.79853	-2.71343	-2.70024							Testing	-2.78077	0.00918066	-0.188019
[TOA]Br-DecA (1 : 2)	298.15	490	0.032505	0.342837	0.357628	2.86089	20.0166	12.4257	1.00395	1.4713	1.30073	0	-2.5396	-2.5481	-2.56977	-2.50264	-2.49761							Testing	-2.56157	0.00906011	-0.42113
[TOA]Br-DecA (1 : 2)	298.15	790	0.032505	0.342837	0.357628	2.86089	20.0166	12.4257	1.00395	1.4713	1.30073	0	-2.0778	-2.08535	-2.06864	-2.03971	-2.14108							Training	-2.09811	0.0087885	-1.08712
[TOA]Br-DecA (1 : 2)	298.15	990	0.032505	0.342837	0.357628	2.86089	20.0166	12.4257	1.00395	1.4713	1.30073	0	-1.8702	-1.86929	-1.83396	-1.80444	-1.98464							Training	-1.86628	0.00868248	-0.75577
[TOA]Br-DecA (1 : 2)	298.15	1490	0.032505	0.342837	0.357628	2.86089	20.0166	12.4257	1.00395	1.4713	1.30073	0	-1.51	-1.5111	-1.45724	-1.41909	-1.66402							Testing	-1.45806	0.00868012	-0.332843
[TOA]Br-DecA (1 : 2)	298.15	1990	0.032505	0.342837	0.357628	2.86089	20.0166	12.4257	1.00395	1.4713	1.30073	0	-1.2605	-1.26745	-1.25283	-1.26743	-1.38283							Testing	-1.19137	0.00905304	-0.145422
[TOA]Br-DecA (1 : 2)	308.15	90	0.032505	0.342837	0.357628	2.86089	20.0166	12.4257	1.00395	1.4713	1.30073	0	-4.2977	-4.27564	-4.29405	-4.26512	-4.26971							Training	-4.2958	0.00980218	0.328485
[TOA]Br-DecA (1 : 2)	308.15	190	0.032505	0.342837	0.357628	2.86089	20.0166	12.4257	1.00395	1.4713	1.30073	0	-3.5756	-3.56145	-3.60916	-3.56182	-3.56647							Testing	-3.62645	0.00962461	0.20648
[TOA]Br-DecA (1 : 2)	308.15	290	0.032505	0.342837	0.357628	2.86089	20.0166	12.4257	1.00395	1.4713	1.30073	0	-3.1725	-3.16086	-3.20511	-3.15291	-3.11683							Testing	-3.18411	0.00946204	-0.0475528
[TOA]Br-DecA (1 : 2)	308.15	390	0.032505	0.342837	0.357628	2.86089	20.0166	12.4257	1.00395	1.4713	1.30073	0	-2.8842	-2.88695	-2.91748	-2.88316	-2.81865							Training	-2.88723	0.00931449	-0.0479504
[TOA]Br-DecA (1 : 2)	308.15	490	0.032505	0.342837	0.357628	2.86089	20.0166	12.4257	1.00395	1.4713	1.30073	0	-2.6679	-2.67253	-2.68832	-2.68048	-2.61107							Training	-2.67117	0.00918195	-0.254282
[TOA]Br-DecA (1 : 2)	308.15	790	0.032505	0.342837	0.357628	2.86089	20.0166	12.4257	1.00395	1.4713	1.30073	0	-2.2146	-2.20477	-2.18618	-2.22844	-2.23687							Training	-2.22202	0.00887438	-1.16111
[TOA]Br-DecA (1 : 2)	308.15	990	0.032505	0.342837	0.357628	2.86089	20.0166	12.4257	1.00395	1.4713	1.30073	0	-2.0047	-1.98627	-1.95098	-1.99193	-2.06843							Training	-2.00152	0.0087444	-0.824319
[TOA]Br-DecA (1 : 2)	308.15	1490	0.032505	0.342837	0.357628	2.86089	20.0166	12.4257	1.00395	1.4713	1.30073	0	-1.6394	-1.62514	-1.57332	-1.58135	-1.72117							Testing	-1.6136	0.00868211	-0.388225
[TOA]Br-DecA (1 : 2)	308.15	1990	0.032505	0.342837	0.357628	2.86089	20.0166	12.4257	1.00395	1.4713	1.30073	0	-1.3899	-1.3812	-1.36826	-1.3869	-1.41942							Training	-1.34737	0.0089951	-0.168176
[TOA]Br-DecA (1 : 2)	323.15	90	0.032505	0.342837	0.357628	2.86089	20.0166	12.4257	1.00395	1.4713	1.30073	0	-4.4741	-4.47395	-4.46976	-4.41916	-4.44323							Testing	-4.46126	0.0104081	0.627985
[TOA]Br-DecA (1 : 2)	323.15	190	0.032505	0.342837	0.357628	2.86089	20.0166	12.4257	1.00395	1.4713	1.30073	0	-3.7423	-3.75871	-3.7849	-3.75665	-3.74197							Testing	-3.79283	0.0102126	0.570839
[TOA]Br-DecA (1 : 2)	323.15	290	0.032505	0.342837	0.357628	2.86089	20.0166	12.4257	1.00395	1.4713	1.30073	0	-3.3439	-3.35613	-3.38033	-3.37602	-3.28946							Training	-3.35188	0.0100321	0.24586
[TOA]Br-DecA (1 : 2)	323.15	390	0.032505	0.342837	0.357628	2.86089	20.0166	12.4257	1.00395	1.4713	1.30073	0	-3.0576	-3.07971	-3.09206	-3.12717	-2.98561							Training	-3.05707	0.00986652	0.205038
[TOA]Br-DecA (1 : 2)	323.15	490	0.032505	0.342837	0.357628	2.86089	20.0166	12.4257	1.00395	1.4713	1.30073	0	-2.8387	-2.86258	-2.86228	-2.9403	-2.77079							Training	-2.84411	0.009716	0.00485399
[TOA]Br-DecA (1 : 2)	323.15	790	0.032505	0.342837	0.357628	2.86089	20.0166	12.4257	1.00395	1.4713	1.30073	0	-2.386	-2.38722	-2.35854	-2.51316	-2.37177							Testing	-2.40977	0.00935451	-1.09281
[TOA]Br-DecA (1 : 2)	323.15	990	0.032505	0.342837	0.357628	2.86089	20.0166	12.4257	1.00395	1.4713	1.30073	0	-2.176	-2.16497	-2.12251	-2.27763	-2.18692							Training	-2.2	0.00918857	-0.855147
[TOA]Br-DecA (1 : 2)	323.15	1490	0.032505	0.342837	0.357628	2.86089	20.0166	12.4257	1.00395	1.4713	1.30073	0	-1.8091	-1.79928	-1.74331	-1.82913	-1.80388							Testing	-1.82254	0.0090364	-0.414738
[TOA]Br-DecA (1 : 2)	323.15	1990	0.032505	0.342837	0.357628	2.86089	20.0166	12.4257	1.00395	1.4713	1.30073	0	-1.5549	-1.55481	-1.53717	-1.56757	-1.4745							Training	-1.53785	0.0092595	-0.184108
[TOA]Cl-DecA (1 : 2)	298.15	90	0.032505	0.342837	0.328473	2.77402	19.9623	12.5631	1.04849	1.26189	1.1449	0.144364	-4.1734	-4.2047	-4.20408	-4.23288	-4.13962							Training	-4.202	0.00989135	0.0857408
[TOA]Cl-DecA (1 : 2)	298.15	190	0.032505	0.342837	0.328473	2.77402	19.9623	12.5631	1.04849	1.26189	1.1449	0.144364	-3.4546	-3.44605	-3.45761	-3.43836	-3.44465							Training	-3.48414	0.00981839	-0.00328595
[TOA]Cl-DecA (1 : 2)	298.15	290	0.032505	0.342837	0.328473	2.77402	19.9623	12.5631	1.04849	1.26189	1.1449	0.144364	-3.0262	-3.03054	-3.04759	-2.98937	-3.00105							Testing	-3.01424	0.00976044	-0.167712
[TOA]Cl-DecA (1 : 2)	298.15	390	0.032505	0.342837	0.328473	2.77402	19.9623	12.5631	1.04849	1.26189	1.1449	0.144364	-2.7411	-2.75147	-2.77133	-2.70576	-2.7075							Training	-2.71326	0.0097175	-0.178081
[TOA]Cl-DecA (1 : 2)	298.15	490	0.032505	0.342837	0.328473	2.77402	19.9623	12.5631	1.04849	1.26189	1.1449	0.144364	-2.5295	-2.53503	-2.55816	-2.50321	-2.50362							Testing	-2.50577	0.00968958	-0.423692
[TOA]Cl-DecA (1 : 2)	298.15	690	0.032505	0.342837	0.328473	2.77402	19.9623	12.5631	1.04849	1.26189	1.1449	0.144364	-2.1982	-2.20055	-2.23201	-2.20683	-2.23552							Testing	-2.20608	0.00967876	-1.06307
[TOA]Cl-DecA (1 : 2)	298.15	790	0.032505	0.342837	0.328473	2.77402	19.9623	12.5631	1.04849	1.26189	1.1449	0.144364	-2.0754	-2.06767	-2.10265	-2.08737	-2.13716							Training	-2.07956	0.00969586	-1.13733
[TOA]Cl-DecA (1 : 2)	298.15	990	0.032505	0.342837	0.328473	2.77402	19.9623	12.5631	1.04849	1.26189	1.1449	0.144364	-1.8663	-1.85404	-1.89298	-1.88549	-1.97184							Training	-1.85274	0.00977511	-0.802429
[TOA]Cl-DecA (1 : 2)	298.15	1190	0.032505	0.342837	0.328473	2.77402	19.9623	12.5631	1.04849	1.26189	1.1449	0.144364	-1.7027	-1.69311	-1.7339	-1.72455	-1.82687							Training	-1.66365	0.0099144	-0.57511
[TOA]Cl-DecA (1 : 2)	298.15	1490	0.032505	0.342837	0.328473	2.77402	19.9623	12.5631	1.04849	1.26189	1.1449	0.144364	-1.5037	-1.51149	-1.56256	-1.54485	-1.62626							Testing	-1.45638	0.0102359	-0.373022
[TOA]Cl-DecA (1 : 2)	298.15	1790	0.032505	0.342837	0.328473	2.77402	19.9623	12.5631	1.04849	1.26189	1.1449	0.144364	-1.3448	-1.35834	-1.44589	-1.41738	-1.43786							Training	-1.32161	0.0106925	-0.207385
[TOA]Cl-DecA (1 : 2)	298.15	1990	0.032505	0.342837	0.328473	2.77402	19.9623	12.5631	1.04849	1.26189	1.1449	0.144364	-1.2577	-1.253	-1.38847	-1.3505	-1.318							Training	-1.25595	0.011072	-0.160945
[TOA]Cl-DecA (1 : 2)	308.15	90	0.032505	0.342837	0.328473	2.77402	19.9623	12.5631	1.04849	1.26189	1.1449	0.144364	-4.2759	-4.32336	-4.24731	-4.33163	-4.29748							Training	-4.30496	0.00985316	0.353922
[TOA]Cl-DecA (1 : 2)	308.15	190	0.032505	0.342837	0.328473	2.77402	19.9623	12.5631	1.04849	1.26189	1.1449	0.144364	-3.572	-3.56475	-3.50074	-3.55359	-3.60379							Training	-3.59103	0.00976821	0.229665
[TOA]Cl-DecA (1 : 2)	308.15	290	0.032505	0.342837	0.328473	2.77402	19.9623	12.5631	1.04849	1.26189	1.1449	0.144364	-3.1653	-3.14861	-3.09018	-3.11104	-3.158							Testing	-3.12438	0.00969828	-0.0568368
[TOA]Cl-DecA (1 : 2)	308.15	390	0.032505	0.342837	0.328473	2.77402	19.9623	12.5631	1.04849	1.26189	1.1449	0.144364	-2.8612	-2.8685	-2.81328	-2.82831	-2.86019							Testing	-2.82586	0.00964336	-0.0555972
[TOA]Cl-DecA (1 : 2)	308.15	490	0.032505	0.342837	0.328473	2.77402	19.9623	12.5631	1.04849	1.26189	1.1449	0.144364	-2.6451	-2.65088	-2.59949	-2.6232	-2.6508							Training	-2.62041	0.00960345	-0.226867
[TOA]Cl-DecA (1 : 2)	308.15	690	0.032505	0.342837	0.328473	2.77402	19.9623	12.5631	1.04849	1.26189	1.1449	0.144364	-2.3351	-2.31418	-2.2722	-2.31528	-2.36989							Training	-2.32494	0.00956866	-0.929406
[TOA]Cl-DecA (1 : 2)	308.15	790	0.032505	0.342837	0.328473	2.77402	19.9623	12.5631	1.04849	1.26189	1.1449	0.144364	-2.2027	-2.18052	-2.14235	-2.18785	-2.26477							Training	-2.20102	0.00957378	-1.18885
[TOA]Cl-DecA (1 : 2)	308.15	990	0.032505	0.342837	0.328473	2.77402	19.9623	12.5631	1.04849	1.26189	1.1449	0.144364	-1.9988	-1.96637	-1.93179	-1.9675	-2.08596							Training	-1.98031	0.00962906	-0.866249
[TOA]Cl-DecA (1 : 2)	308.15	1190	0.032505	0.342837	0.328473	2.77402	19.9623	12.5631	1.04849	1.26189	1.1449	0.144364	-1.8295	-1.8066	-1.77195	-1.78716	-1.92799							Training	-1.79727	0.00974438	-0.625453
[TOA]Cl-DecA (1 : 2)	308.15	1490	0.032505	0.342837	0.328473	2.77402	19.9623	12.5631	1.04849	1.26189	1.1449	0.144364	-1.6296	-1.63043	-1.59964	-1.58237	-1.70939							Training	-1.59525	0.0100299	-0.392056
[TOA]Cl-DecA (1 : 2)	308.15	1790	0.032505	0.342837	0.328473	2.77402	19.9623	12.5631	1.04849	1.26189	1.1449	0.144364	-1.474	-1.4882	-1.48215	-1.43907	-1.50502							Training	-1.45933	0.0104506	-0.263403
[TOA]Cl-DecA (1 : 2)	308.15	1990	0.032505	0.342837	0.328473	2.77402	19.9623	12.5631	1.04849	1.26189	1.1449	0.144364	-1.3823	-1.3939	-1.42425	-1.3667	-1.37563							Training	-1.39004	0.0108061	-0.206086
[Ach]Cl-Imidazole (1 : 2)	303.15	26.6	0.000693	0.415569	0.992502	4.00307	2.98952	1.94044	1.2559	1.06751	1.5322	0.150299	-6.2659	-6.39499	-6.34185	-6.31769	-6.25846							Training	-6.25611	0.00578556	0.0761725
[Ach]Cl-Imidazole (1 : 2)	303.15	57.2	0.000693	0.415569	0.992502	4.00307	2.98952	1.94044	1.2559	1.06751	1.5322	0.150299	-5.684	-5.87099	-5.81879	-5.8661	-5.88975							Testing	-5.94673	0.0057673	0.851041
[Ach]Cl-Imidazole (1 : 2)	303.15	93.2	0.000693	0.415569	0.992502	4.00307	2.98952	1.94044	1.2559	1.06751	1.5322	0.150299	-5.2983	-5.40974	-5.35691	-5.44154	-5.51984							Training	-5.60672	0.00574763	1.17279
[Ach]Cl-Imidazole (1 : 2)	303.15	141.4	0.000693	0.415569	0.992502	4.00307	2.98952	1.94044	1.2559	1.06751	1.5322	0.150299	-4.9063	-4.97156	-4.91435	-5.00908	-5.11346							Testing	-5.20276	0.00572433	1.17734
[Ach]Cl-Imidazole (1 : 2)	303.15	240	0.000693	0.415569	0.992502	4.00307	2.98952	1.94044	1.2559	1.06751	1.5322	0.150299	-4.3982	-4.43174	-4.35899	-4.43513	-4.51581							Testing	-4.57428	0.00568753	1.00326
[Ach]Cl-Imidazole (1 : 2)	303.15	331.4	0.000693	0.415569	0.992502	4.00307	2.98952	1.94044	1.2559	1.06751	1.5322	0.150299	-4.1105	-4.13138	-4.04781	-4.11002	-4.14962							Training	-4.19264	0.00566645	1.0842
[Ach]Cl-Imidazole (1 : 2)	303.15	422	0.000693	0.415569	0.992502	4.00307	2.98952	1.94044	1.2559	1.06751	1.5322	0.150299	-3.8922	-3.91262	-3.8288	-3.88441	-3.8969							Testing	-3.93875	0.00565794	0.895494
[Ach]Cl-Imidazole (1 : 2)	303.15	525.7	0.000693	0.415569	0.992502	4.00307	2.98952	1.94044	1.2559	1.06751	1.5322	0.150299	-3.705	-3.71015	-3.63896	-3.68603	-3.69091							Training	-3.73171	0.00566331	0.648374
[Ach]Cl-Imidazole (1 : 2)	303.15	578.5	0.000693	0.415569	0.992502	4.00307	2.98952	1.94044	1.2559	1.06751	1.5322	0.150299	-3.6156	-3.62052	-3.5594	-3.59922	-3.60849							Training	-3.64461	0.00567225	0.480779
[Ach]Cl-Imidazole (1 : 2)	313.15	29.6	0.000693	0.415569	0.992502	4.00307	2.98952	1.94044	1.2559	1.06751	1.5322	0.150299	-6.9078	-6.54388	-6.59924	-6.5199	-6.38954							Training	-6.39695	0.00523263	-0.984669
[Ach]Cl-Imidazole (1 : 2)	313.15	59.9	0.000693	0.415569	0.992502	4.00307	2.98952	1.94044	1.2559	1.06751	1.5322	0.150299	-6.0323	-6.03845	-6.09524	-6.08129	-6.03393							Testing	-6.09295	0.00521105	0.496847
[Ach]Cl-Imidazole (1 : 2)	313.15	100	0.000693	0.415569	0.992502	4.00307	2.98952	1.94044	1.2559	1.06751	1.5322	0.150299	-5.5468	-5.54477	-5.60146	-5.61999	-5.63596							Training	-5.71988	0.00518461	0.974148
[Ach]Cl-Imidazole (1 : 2)	313.15	149.8	0.000693	0.415569	0.992502	4.00307	2.98952	1.94044	1.2559	1.06751	1.5322	0.150299	-5.1673	-5.11807	-5.17115	-5.18795	-5.23563							Testing	-5.31415	0.00515514	0.925562
[Ach]Cl-Imidazole (1 : 2)	313.15	242.3	0.000693	0.415569	0.992502	4.00307	2.98952	1.94044	1.2559	1.06751	1.5322	0.150299	-4.6995	-4.6297	-4.67165	-4.65207	-4.6953							Training	-4.73949	0.00511028	0.773064
[Ach]Cl-Imidazole (1 : 2)	313.15	335.8	0.000693	0.415569	0.992502	4.00307	2.98952	1.94044	1.2559	1.06751	1.5322	0.150299	-4.382	-4.3254	-4.36076	-4.30939	-4.32978							Training	-4.35502	0.00507798	0.852666
[Ach]Cl-Imidazole (1 : 2)	313.15	426.5	0.000693	0.415569	0.992502	4.00307	2.98952	1.94044	1.2559	1.06751	1.5322	0.150299	-4.1477	-4.10725	-4.14608	-4.07409	-4.08336							Training	-4.10402	0.00505919	0.755645
[Ach]Cl-Imidazole (1 : 2)	313.15	529.8	0.000693	0.415569	0.992502	4.00307	2.98952	1.94044	1.2559	1.06751	1.5322	0.150299	-3.9425	-3.90467	-3.95727	-3.8662	-3.88259							Testing	-3.89726	0.00505283	0.453654
[Ach]Cl-Imidazole (1 : 2)	313.15	588.2	0.000693	0.415569	0.992502	4.00307	2.98952	1.94044	1.2559	1.06751	1.5322	0.150299	-3.8351	-3.80506	-3.86748	-3.76526	-3.79365							Training	-3.79974	0.00505633	0.334153
[Ach]Cl-Imidazole (1 : 2)	323.15	27.5	0.000693	0.415569	0.992502	4.00307	2.98952	1.94044	1.2559	1.06751	1.5322	0.150299	-7.0131	-6.79458	-6.81554	-6.77324	-6.58979							Training	-6.60945	0.00487071	-0.685549
[Ach]Cl-Imidazole (1 : 2)	323.15	88.3	0.000693	0.415569	0.992502	4.00307	2.98952	1.94044	1.2559	1.06751	1.5322	0.150299	-5.8091	-5.88294	-5.91119	-5.9633	-5.92668							Testing	-6.01698	0.00482133	1.01676
[Ach]Cl-Imidazole (1 : 2)	323.15	142.6	0.000693	0.415569	0.992502	4.00307	2.98952	1.94044	1.2559	1.06751	1.5322	0.150299	-5.3602	-5.38129	-5.41099	-5.46076	-5.47613							Training	-5.56184	0.00478191	1.16395
[Ach]Cl-Imidazole (1 : 2)	323.15	232.3	0.000693	0.415569	0.992502	4.00307	2.98952	1.94044	1.2559	1.06751	1.5322	0.150299	-4.9063	-4.88118	-4.9068	-4.9084	-4.93872							Testing	-4.98526	0.0047265	0.746278
[Ach]Cl-Imidazole (1 : 2)	323.15	331.6	0.000693	0.415569	0.992502	4.00307	2.98952	1.94044	1.2559	1.06751	1.5322	0.150299	-4.5659	-4.54638	-4.56891	-4.52226	-4.54343							Testing	-4.56245	0.00467924	0.836587
[Ach]Cl-Imidazole (1 : 2)	323.15	424.1	0.000693	0.415569	0.992502	4.00307	2.98952	1.94044	1.2559	1.06751	1.5322	0.150299	-4.3275	-4.32022	-4.34658	-4.27058	-4.29193							Testing	-4.30073	0.00464853	0.738308
[Ach]Cl-Imidazole (1 : 2)	323.15	526.8	0.000693	0.415569	0.992502	4.00307	2.98952	1.94044	1.2559	1.06751	1.5322	0.150299	-4.1044	-4.11533	-4.15175	-4.05343	-4.0928							Testing	-4.08962	0.00462949	0.532789
[Ach]Cl-Imidazole (1 : 2)	323.15	587.1	0.000693	0.415569	0.992502	4.00307	2.98952	1.94044	1.2559	1.06751	1.5322	0.150299	-4.0063	-4.01042	-4.05331	-3.94383	-4.00136							Training	-3.98563	0.00462568	0.379245
[Ach]Cl-Imidazole (1 : 2)	333.15	30.6	0.000693	0.415569	0.992502	4.00307	2.98952	1.94044	1.2559	1.06751	1.5322	0.150299	-7.0131	-6.94928	-6.92629	-6.9194	-6.7298							Testing	-6.78293	0.00469158	-0.261867
[Ach]Cl-Imidazole (1 : 2)	333.15	60.2	0.000693	0.415569	0.992502	4.00307	2.98952	1.94044	1.2559	1.06751	1.5322	0.150299	-6.3771	-6.45916	-6.44239	-6.49721	-6.3926							Training	-6.48721	0.00466343	0.743891
[Ach]Cl-Imidazole (1 : 2)	333.15	99	0.000693	0.415569	0.992502	4.00307	2.98952	1.94044	1.2559	1.06751	1.5322	0.150299	-5.9145	-5.98078	-5.96959	-6.05167	-6.01706							Testing	-6.12707	0.00462853	1.08533
[Ach]Cl-Imidazole (1 : 2)	333.15	148.6	0.000693	0.415569	0.992502	4.00307	2.98952	1.94044	1.2559	1.06751	1.5322	0.150299	-5.5468	-5.55235	-5.54366	-5.6161	-5.62683							Testing	-5.7227	0.00458721	1.06795
[Ach]Cl-Imidazole (1 : 2)	333.15	235.9	0.000693	0.415569	0.992502	4.00307	2.98952	1.94044	1.2559	1.06751	1.5322	0.150299	-5.0832	-5.08051	-5.06808	-5.08962	-5.1222							Testing	-5.17232	0.00452344	0.7442
[Ach]Cl-Imidazole (1 : 2)	333.15	339.2	0.000693	0.415569	0.992502	4.00307	2.98952	1.94044	1.2559	1.06751	1.5322	0.150299	-4.7217	-4.73861	-4.71967	-4.69058	-4.72579							Training	-4.7409	0.00446277	0.909041
[Ach]Cl-Imidazole (1 : 2)	333.15	429.2	0.000693	0.415569	0.992502	4.00307	2.98952	1.94044	1.2559	1.06751	1.5322	0.150299	-4.4918	-4.52041	-4.49978	-4.44408	-4.49029							Training	-4.48921	0.00442296	0.806641
[Ach]Cl-Imidazole (1 : 2)	333.15	536.5	0.000693	0.415569	0.992502	4.00307	2.98952	1.94044	1.2559	1.06751	1.5322	0.150299	-4.2687	-4.30638	-4.28822	-4.21274	-4.2899							Training	-4.26736	0.0043914	0.563992
[Ach]Cl-Imidazole (1 : 2)	333.15	589.9	0.000693	0.415569	0.992502	4.00307	2.98952	1.94044	1.2559	1.06751	1.5322	0.150299	-4.1734	-4.21288	-4.19639	-4.11277	-4.21148							Testing	-4.17315	0.00438213	0.362143
[Ch]Cl-Urea (1 : 2)	313.15	1130	0	0.523809	1.90949	3.096	1.56587	0.968119	0.73933	1.27905	2.12809	0.016637	-2.5639	-2.57429	-2.63644	-2.83002	-2.96209							Training	-2.68939	0.0108642	2.19191
[Ch]Cl-Urea (1 : 2)	313.15	2850	0	0.523809	1.90949	3.096	1.56587	0.968119	0.73933	1.27905	2.12809	0.016637	-1.8971	-1.90011	-1.95695	-2.14515	-2.18253							Training	-2.08992	0.0108999	2.39681
[Ch]Cl-Urea (1 : 2)	313.15	4370	0	0.523809	1.90949	3.096	1.56587	0.968119	0.73933	1.27905	2.12809	0.016637	-1.6555	-1.68202	-1.69156	-1.90599	-1.84907							Training	-1.88734	0.0146278	1.75585
[Ch]Cl-Urea (1 : 2)	313.15	6230	0	0.523809	1.90949	3.096	1.56587	0.968119	0.73933	1.27905	2.12809	0.016637	-1.4567	-1.37029	-1.42591	-1.72105	-1.80635							Testing	-1.77078	0.023908	0.692046
[Ch]Cl-Urea (1 : 2)	323.15	1010	0	0.523809	1.90949	3.096	1.56587	0.968119	0.73933	1.27905	2.12809	0.016637	-2.8134	-2.86717	-2.84592	-3.12617	-3.16191							Training	-2.99836	0.0109113	1.94716
[Ch]Cl-Urea (1 : 2)	323.15	2240	0	0.523809	1.90949	3.096	1.56587	0.968119	0.73933	1.27905	2.12809	0.016637	-2.2349	-2.14055	-2.20991	-2.47578	-2.49684							Training	-2.38168	0.0101155	2.33405
[Ch]Cl-Urea (1 : 2)	323.15	3170	0	0.523809	1.90949	3.096	1.56587	0.968119	0.73933	1.27905	2.12809	0.016637	-2.025	-1.98552	-1.99379	-2.24183	-2.16317							Testing	-2.22175	0.0110216	2.01174
[Ch]Cl-Urea (1 : 2)	323.15	4740	0	0.523809	1.90949	3.096	1.56587	0.968119	0.73933	1.27905	2.12809	0.016637	-1.7148	-1.75611	-1.73263	-2.01889	-1.86699							Testing	-1.94176	0.0154969	1.50329
[Ch]Cl-Urea (1 : 2)	333.15	1000	0	0.523809	1.90949	3.096	1.56587	0.968119	0.73933	1.27905	2.12809	0.016637	-2.9759	-3.0286	-2.96508	-3.33543	-3.29391							Training	-3.22922	0.0109995	1.82038
[Ch]Cl-Urea (1 : 2)	333.15	2360	0	0.523809	1.90949	3.096	1.56587	0.968119	0.73933	1.27905	2.12809	0.016637	-2.3126	-2.24894	-2.28399	-2.59975	-2.54219							Testing	-2.59539	0.010069	2.22295
[Ch]Cl-Urea (1 : 2)	333.15	4800	0	0.523809	1.90949	3.096	1.56587	0.968119	0.73933	1.27905	2.12809	0.016637	-1.8643	-1.87664	-1.83711	-2.15514	-1.92644							Testing	-2.03958	0.0153584	1.35441
[Ch]Cl-Urea (1 : 2)	333.15	6310	0	0.523809	1.90949	3.096	1.56587	0.968119	0.73933	1.27905	2.12809	0.016637	-1.6195	-1.61565	-1.63954	-2.0167	-1.98499							Training	-1.85854	0.0231084	0.792749
BTEACl-AC (1 : 2)	298.15	325	0.042768	0.338019	0.372437	4.35719	4.27487	2.16733	1.00315	1.28923	1.32957	0.043214	-4.2733	-4.25912	-4.15381	-4.30215	-4.29433							Testing	-4.07308	0.00737943	-0.279786
BTEACl-AC (1 : 2)	298.15	551	0.042768	0.338019	0.372437	4.35719	4.27487	2.16733	1.00315	1.28923	1.32957	0.043214	-3.5528	-3.68362	-3.6587	-3.75803	-3.68526							Testing	-3.48369	0.00720027	-0.199948
BTEACl-AC (1 : 2)	298.15	957	0.042768	0.338019	0.372437	4.35719	4.27487	2.16733	1.00315	1.28923	1.32957	0.043214	-3.1157	-3.04719	-3.14609	-3.1955	-3.12683							Testing	-2.87948	0.007071	-1.13471
BTEACl-AC (1 : 2)	298.15	1377	0.042768	0.338019	0.372437	4.35719	4.27487	2.16733	1.00315	1.28923	1.32957	0.043214	-2.779	-2.68545	-2.77459	-2.80105	-2.7143							Testing	-2.49865	0.00719765	-0.682607
BTEACl-AC (1 : 2)	298.15	1664	0.042768	0.338019	0.372437	4.35719	4.27487	2.16733	1.00315	1.28923	1.32957	0.043214	-2.5215	-2.52864	-2.54569	-2.60311	-2.4644							Training	-2.32582	0.00743649	-0.279668
BTEACl-AC (1 : 2)	298.15	2054	0.042768	0.338019	0.372437	4.35719	4.27487	2.16733	1.00315	1.28923	1.32957	0.043214	-2.3249	-2.35312	-2.40075	-2.40303	-2.15641							Testing	-2.15352	0.00795921	-0.159308
BTMACl-AC (1 : 2)	298.15	219	0.042768	0.338019	0.624105	3.82192	3.70689	1.85102	0.931584	1.33443	1.33157	0.009418	-4.889	-4.67542	-4.64685	-4.5505	-4.68063							Training	-4.78384	0.00542795	-0.698087
BTMACl-AC (1 : 2)	298.15	530	0.042768	0.338019	0.624105	3.82192	3.70689	1.85102	0.931584	1.33443	1.33157	0.009418	-3.662	-3.64682	-3.59141	-3.57299	-3.59398							Training	-3.68387	0.00500591	-0.0291657
BTMACl-AC (1 : 2)	298.15	886	0.042768	0.338019	0.624105	3.82192	3.70689	1.85102	0.931584	1.33443	1.33157	0.009418	-2.7357	-2.98393	-2.9337	-3.02201	-3.06629							Testing	-3.02822	0.00470103	-0.000422931
BTMACl-AC (1 : 2)	298.15	1141	0.042768	0.338019	0.624105	3.82192	3.70689	1.85102	0.931584	1.33443	1.33157	0.009418	-2.4827	-2.65954	-2.62421	-2.72024	-2.79492							Training	-2.68975	0.00459959	0.431051
BTMACl-AC (1 : 2)	298.15	1563	0.042768	0.338019	0.624105	3.82192	3.70689	1.85102	0.931584	1.33443	1.33157	0.009418	-2.3302	-2.29349	-2.29145	-2.32296	-2.40681							Testing	-2.29331	0.00464613	0.410221
BTMACl-AC (1 : 2)	298.15	1874	0.042768	0.338019	0.624105	3.82192	3.70689	1.85102	0.931584	1.33443	1.33157	0.009418	-2.1816	-2.09621	-2.13735	-2.09201	-2.15166							Testing	-2.08943	0.00485153	0.511523
BTMACl-AC (1 : 2)	298.15	2037	0.042768	0.338019	0.624105	3.82192	3.70689	1.85102	0.931584	1.33443	1.33157	0.009418	-2.0883	-2.00195	-2.07705	-1.98718	-2.02715							Testing	-2.00293	0.00501717	0.600352
BTMACl-GLY (1 : 2)	298.15	394	0.002706	0.234267	0.961233	4.66563	3.9796	2.04893	0.92175	1.13699	1.92944	0.009418	-5.4331	-5.4865	-5.49272	-5.3708	-5.20571							Testing	-5.46016	0.00751807	-2.7805
BTMACl-GLY (1 : 2)	298.15	672	0.002706	0.234267	0.961233	4.66563	3.9796	2.04893	0.92175	1.13699	1.92944	0.009418	-5.0209	-4.9107	-4.81803	-4.84838	-4.70472							Training	-4.875	0.00721716	-3.82025
BTMACl-GLY (1 : 2)	298.15	999	0.002706	0.234267	0.961233	4.66563	3.9796	2.04893	0.92175	1.13699	1.92944	0.009418	-4.4866	-4.42798	-4.30685	-4.42767	-4.37762							Training	-4.37562	0.00701169	-3.66841
BTMACl-GLY (1 : 2)	298.15	1345	0.002706	0.234267	0.961233	4.66563	3.9796	2.04893	0.92175	1.13699	1.92944	0.009418	-3.8842	-4.05707	-3.95986	-4.07507	-4.10616							Training	-3.98607	0.00696906	-2.52002
BTMACl-GLY (1 : 2)	298.15	1711	0.002706	0.234267	0.961233	4.66563	3.9796	2.04893	0.92175	1.13699	1.92944	0.009418	-3.6412	-3.7146	-3.72383	-3.77131	-3.8498							Testing	-3.70914	0.00711955	-2.22938
BTMACl-GLY (1 : 2)	298.15	2026	0.002706	0.234267	0.961233	4.66563	3.9796	2.04893	0.92175	1.13699	1.92944	0.009418	-3.513	-3.40156	-3.58451	-3.55107	-3.64835							Testing	-3.5392	0.00741007	-2.17849
ChCl-Phenol (1 : 2)	293.15	99	0.031878	0.365013	0.762537	4.21038	2.74955	2.429	2.1419	0.939945	1.24956	0.001292	-5.5728	-5.52483	-5.53792	-5.55662	-5.59728							Testing	-5.58266	0.00460452	-0.410871
ChCl-Phenol (1 : 2)	293.15	197.2	0.031878	0.365013	0.762537	4.21038	2.74955	2.429	2.1419	0.939945	1.24956	0.001292	-4.8665	-4.82968	-4.85275	-4.82701	-4.87556							Training	-4.87244	0.00453435	-0.468835
ChCl-Phenol (1 : 2)	293.15	303.1	0.031878	0.365013	0.762537	4.21038	2.74955	2.429	2.1419	0.939945	1.24956	0.001292	-4.3741	-4.38452	-4.39829	-4.36278	-4.36907							Training	-4.37389	0.00447491	-0.088332
ChCl-Phenol (1 : 2)	293.15	397	0.031878	0.365013	0.762537	4.21038	2.74955	2.429	2.1419	0.939945	1.24956	0.001292	-4.1166	-4.09024	-4.10034	-4.08829	-4.06167							Training	-4.08792	0.00443628	-0.153466
ChCl-Phenol (1 : 2)	293.15	494.5	0.031878	0.365013	0.762537	4.21038	2.74955	2.429	2.1419	0.939945	1.24956	0.001292	-3.8728	-3.82857	-3.84503	-3.87226	-3.8274							Testing	-3.87617	0.00441017	-0.307328
ChCl-Phenol (1 : 2)	303.15	104.3	0.031878	0.365013	0.762537	4.21038	2.74955	2.429	2.1419	0.939945	1.24956	0.001292	-5.5994	-5.6767	-5.66916	-5.69511	-5.70781							Training	-5.71148	0.00392881	-0.0296013
ChCl-Phenol (1 : 2)	303.15	198.2	0.031878	0.365013	0.762537	4.21038	2.74955	2.429	2.1419	0.939945	1.24956	0.001292	-4.9477	-5.02682	-5.02745	-5.017	-5.03404							Testing	-5.03632	0.0038509	-0.200806
ChCl-Phenol (1 : 2)	303.15	295.5	0.031878	0.365013	0.762537	4.21038	2.74955	2.429	2.1419	0.939945	1.24956	0.001292	-4.5564	-4.61309	-4.60555	-4.58444	-4.56662							Testing	-4.56742	0.00378414	-0.0583109
ChCl-Phenol (1 : 2)	303.15	400.6	0.031878	0.365013	0.762537	4.21038	2.74955	2.429	2.1419	0.939945	1.24956	0.001292	-4.2904	-4.2805	-4.26982	-4.27014	-4.22111							Testing	-4.2384	0.00372799	-0.181275
ChCl-Phenol (1 : 2)	303.15	510.1	0.031878	0.365013	0.762537	4.21038	2.74955	2.429	2.1419	0.939945	1.24956	0.001292	-4.0745	-3.98794	-3.98737	-4.02632	-3.96512							Training	-4.00051	0.00368713	-0.423719
ChCl-Phenol (1 : 2)	313.15	121.8	0.031878	0.365013	0.762537	4.21038	2.74955	2.429	2.1419	0.939945	1.24956	0.001292	-5.7138	-5.72761	-5.70692	-5.73441	-5.72392							Testing	-5.76761	0.00342699	-0.136472
ChCl-Phenol (1 : 2)	313.15	217.8	0.031878	0.365013	0.762537	4.21038	2.74955	2.429	2.1419	0.939945	1.24956	0.001292	-5.116	-5.13355	-5.11533	-5.11264	-5.09426							Testing	-5.12185	0.00333851	-0.37541
ChCl-Phenol (1 : 2)	313.15	322	0.031878	0.365013	0.762537	4.21038	2.74955	2.429	2.1419	0.939945	1.24956	0.001292	-4.6995	-4.72514	-4.69873	-4.69202	-4.64023							Testing	-4.66308	0.00325813	-0.14318
ChCl-Phenol (1 : 2)	313.15	417.4	0.031878	0.365013	0.762537	4.21038	2.74955	2.429	2.1419	0.939945	1.24956	0.001292	-4.4145	-4.43494	-4.40899	-4.42216	-4.35093							Training	-4.38428	0.00319883	-0.120277
ChCl-Phenol (1 : 2)	313.15	503	0.031878	0.365013	0.762537	4.21038	2.74955	2.429	2.1419	0.939945	1.24956	0.001292	-4.2064	-4.20625	-4.19016	-4.22926	-4.15454							Training	-4.19691	0.00315725	-0.24264
ChCl-Phenol (1 : 2)	323.15	115.2	0.031878	0.365013	0.762537	4.21038	2.74955	2.429	2.1419	0.939945	1.24956	0.001292	-6.0323	-5.98793	-5.95323	-5.9864	-5.9449							Training	-6.04728	0.00313544	-0.227044
ChCl-Phenol (1 : 2)	323.15	216.5	0.031878	0.365013	0.762537	4.21038	2.74955	2.429	2.1419	0.939945	1.24956	0.001292	-5.3391	-5.34501	-5.31415	-5.32071	-5.27531							Training	-5.35201	0.00302933	-0.399851
ChCl-Phenol (1 : 2)	323.15	320	0.031878	0.365013	0.762537	4.21038	2.74955	2.429	2.1419	0.939945	1.24956	0.001292	-4.9762	-4.9366	-4.89799	-4.89903	-4.82536							Testing	-4.88918	0.00293683	-0.33719
ChCl-Phenol (1 : 2)	323.15	424.8	0.031878	0.365013	0.762537	4.21038	2.74955	2.429	2.1419	0.939945	1.24956	0.001292	-4.6777	-4.61772	-4.58113	-4.60016	-4.51201							Training	-4.58049	0.00285955	-0.35372
TBABr-AC (1 : 2)	298.15	388	0.042768	0.338019	0.367932	3.34426	7.67017	3.32579	0.747185	1.45088	1.384	0.002703	-3.9129	-3.78671	-3.77036	-3.7165	-3.46236							Training	-3.56261	0.00404552	-0.401799
TBABr-AC (1 : 2)	298.15	715	0.042768	0.338019	0.367932	3.34426	7.67017	3.32579	0.747185	1.45088	1.384	0.002703	-2.9276	-3.1223	-3.04379	-3.12561	-2.84886							Training	-2.96215	0.00395495	-0.419197
TBABr-AC (1 : 2)	298.15	1302	0.042768	0.338019	0.367932	3.34426	7.67017	3.32579	0.747185	1.45088	1.384	0.002703	-2.4073	-2.42684	-2.34422	-2.416	-2.23748							Training	-2.38098	0.00419504	-0.211375
TBABr-AC (1 : 2)	298.15	1730	0.042768	0.338019	0.367932	3.34426	7.67017	3.32579	0.747185	1.45088	1.384	0.002703	-2.1509	-2.09689	-2.08831	-2.06016	-1.88092							Training	-2.09086	0.00469615	0.0535311
TBABr-AC (1 : 2)	298.15	2011	0.042768	0.338019	0.367932	3.34426	7.67017	3.32579	0.747185	1.45088	1.384	0.002703	-1.9382	-1.90666	-1.97561	-1.8881	-1.67116							Training	-1.92238	0.00517468	0.332345
TBACl-AC (1 : 2)	298.15	348	0.042768	0.338019	0.329359	3.13341	7.59394	3.48823	0.723827	1.30274	1.19656	0.102918	-3.727	-3.72716	-3.80051	-3.59502	-3.84718							Testing	-3.57878	0.00287836	0.220771
TBACl-AC (1 : 2)	298.15	631	0.042768	0.338019	0.329359	3.13341	7.59394	3.48823	0.723827	1.30274	1.19656	0.102918	-2.9951	-3.07745	-3.10007	-3.03696	-3.2208							Testing	-3.0122	0.00290786	-0.0740568
TBACl-AC (1 : 2)	298.15	943	0.042768	0.338019	0.329359	3.13341	7.59394	3.48823	0.723827	1.30274	1.19656	0.102918	-2.5888	-2.60443	-2.59639	-2.6353	-2.82216							Training	-2.63613	0.00307972	-0.452009
TBACl-AC (1 : 2)	298.15	1319	0.042768	0.338019	0.329359	3.13341	7.59394	3.48823	0.723827	1.30274	1.19656	0.102918	-2.2604	-2.22492	-2.19269	-2.27523	-2.44385							Testing	-2.31367	0.00348099	-0.011806
TBACl-AC (1 : 2)	298.15	1673	0.042768	0.338019	0.329359	3.13341	7.59394	3.48823	0.723827	1.30274	1.19656	0.102918	-1.9853	-1.97325	-1.93519	-2.01505	-2.12887							Testing	-2.07874	0.00405273	0.349106
TBACl-AC (1 : 2)	298.15	2002	0.042768	0.338019	0.329359	3.13341	7.59394	3.48823	0.723827	1.30274	1.19656	0.102918	-1.8387	-1.78549	-1.76004	-1.78907	-1.86331							Training	-1.88852	0.00475275	0.476987
TEACl-AC (1 : 2)	298.15	281	0.042768	0.338019	0.347005	4.00003	4.08752	1.2156	0.72908	1.28209	1.36287	0.093653	-3.6469	-3.72193	-3.63313	-3.80744	-3.71424							Testing	-3.68877	0.00624669	1.5985
TEACl-AC (1 : 2)	298.15	530	0.042768	0.338019	0.347005	4.00003	4.08752	1.2156	0.72908	1.28209	1.36287	0.093653	-3.0352	-3.05247	-3.06007	-3.13351	-3.03991							Training	-3.05455	0.00616303	1.32625
TEACl-AC (1 : 2)	298.15	822	0.042768	0.338019	0.347005	4.00003	4.08752	1.2156	0.72908	1.28209	1.36287	0.093653	-2.6225	-2.57645	-2.67004	-2.69733	-2.6725							Testing	-2.65861	0.00618349	0.188206
TEACl-AC (1 : 2)	298.15	1304	0.042768	0.338019	0.347005	4.00003	4.08752	1.2156	0.72908	1.28209	1.36287	0.093653	-2.2027	-2.14933	-2.23688	-2.21089	-2.29983							Training	-2.24029	0.00649726	0.836808
TEACl-AC (1 : 2)	298.15	1699	0.042768	0.338019	0.347005	4.00003	4.08752	1.2156	0.72908	1.28209	1.36287	0.093653	-1.971	-1.96912	-1.90761	-1.94409	-2.063							Training	-1.99778	0.0070144	1.06963
TEACl-AC (1 : 2)	298.15	2018	0.042768	0.338019	0.347005	4.00003	4.08752	1.2156	0.72908	1.28209	1.36287	0.093653	-1.8248	-1.84866	-1.77089	-1.79147	-1.90134							Training	-1.82937	0.00760298	1.16091
TBACl-LA (1 : 2)	308	93	0.039963	0.469755	0.719617	3.18855	7.69891	3.90967	0.929087	1.68363	1.25537	0.102918	-5.1832	-5.063	-5.0699	-5.087	-5.10668							Training	-5.08563	0.00605829	0.50473
TBACl-LA (1 : 2)	308	194	0.039963	0.469755	0.719617	3.18855	7.69891	3.90967	0.929087	1.68363	1.25537	0.102918	-4.3513	-4.34681	-4.32989	-4.32631	-4.36835							Training	-4.38996	0.00600202	0.665233
TBACl-LA (1 : 2)	308	293	0.039963	0.469755	0.719617	3.18855	7.69891	3.90967	0.929087	1.68363	1.25537	0.102918	-3.91	-3.94565	-3.92377	-3.88511	-3.90402							Training	-3.94014	0.00596172	0.783577
TBACl-LA (1 : 2)	308	392	0.039963	0.469755	0.719617	3.18855	7.69891	3.90967	0.929087	1.68363	1.25537	0.102918	-3.6242	-3.66418	-3.64321	-3.59021	-3.59301							Training	-3.64016	0.00593613	0.74875
TBACl-LA (1 : 2)	308	493	0.039963	0.469755	0.719617	3.18855	7.69891	3.90967	0.929087	1.68363	1.25537	0.102918	-3.4052	-3.4352	-3.41814	-3.36552	-3.3702							Training	-3.41973	0.00592518	0.541625
TBACl-LA (1 : 2)	308	793	0.039963	0.469755	0.719617	3.18855	7.69891	3.90967	0.929087	1.68363	1.25537	0.102918	-2.9275	-2.93157	-2.92751	-2.89207	-2.96415							Testing	-2.96455	0.00598297	-0.508623
TBACl-LA (1 : 2)	308	892	0.039963	0.469755	0.719617	3.18855	7.69891	3.90967	0.929087	1.68363	1.25537	0.102918	-2.8164	-2.80648	-2.8039	-2.77191	-2.86676							Testing	-2.8456	0.00603168	-0.554503
TBACl-LA (1 : 2)	308	993	0.039963	0.469755	0.719617	3.18855	7.69891	3.90967	0.929087	1.68363	1.25537	0.102918	-2.713	-2.69537	-2.69257	-2.66356	-2.7752							Testing	-2.73574	0.00609655	-0.393787
TBACl-LA (1 : 2)	308	1292	0.039963	0.469755	0.719617	3.18855	7.69891	3.90967	0.929087	1.68363	1.25537	0.102918	-2.4626	-2.44209	-2.43305	-2.41946	-2.52829							Testing	-2.46965	0.00637832	-0.0471283
TBACl-LA (1 : 2)	308	1393	0.039963	0.469755	0.719617	3.18855	7.69891	3.90967	0.929087	1.68363	1.25537	0.102918	-2.3963	-2.37544	-2.36446	-2.36036	-2.4496							Training	-2.39581	0.00650383	0.0647893
TBACl-LA (1 : 2)	308	1493	0.039963	0.469755	0.719617	3.18855	7.69891	3.90967	0.929087	1.68363	1.25537	0.102918	-2.3234	-2.31611	-2.30423	-2.31196	-2.37333							Training	-2.32836	0.00664318	0.157405
TBACl-LA (1 : 2)	308	1793	0.039963	0.469755	0.719617	3.18855	7.69891	3.90967	0.929087	1.68363	1.25537	0.102918	-2.1544	-2.16576	-2.16121	-2.21618	-2.15302							Training	-2.14686	0.00715128	0.317742
TBACl-LA (1 : 2)	308	1893	0.039963	0.469755	0.719617	3.18855	7.69891	3.90967	0.929087	1.68363	1.25537	0.102918	-2.1091	-2.12183	-2.12395	-2.19701	-2.08231							Testing	-2.08987	0.00735067	0.302399
TBACl-LA (1 : 2)	308	1992	0.039963	0.469755	0.719617	3.18855	7.69891	3.90967	0.929087	1.68363	1.25537	0.102918	-2.0618	-2.08028	-2.09134	-2.18255	-2.01365							Testing	-2.03397	0.00756286	0.334638
TBACl-LA (1 : 2)	318	93	0.039963	0.469755	0.719617	3.18855	7.69891	3.90967	0.929087	1.68363	1.25537	0.102918	-5.1534	-5.21345	-5.22977	-5.23089	-5.20818							Testing	-5.23292	0.00526622	1.02849
TBACl-LA (1 : 2)	318	194	0.039963	0.469755	0.719617	3.18855	7.69891	3.90967	0.929087	1.68363	1.25537	0.102918	-4.4524	-4.49648	-4.48971	-4.48628	-4.47857							Testing	-4.53771	0.00519784	0.882413
TBACl-LA (1 : 2)	318	293	0.039963	0.469755	0.719617	3.18855	7.69891	3.90967	0.929087	1.68363	1.25537	0.102918	-4.0763	-4.09384	-4.0831	-4.05253	-4.01928							Training	-4.08805	0.00514568	0.83236
TBACl-LA (1 : 2)	318	393	0.039963	0.469755	0.719617	3.18855	7.69891	3.90967	0.929087	1.68363	1.25537	0.102918	-3.7684	-3.80793	-3.79949	-3.75832	-3.7086							Testing	-3.78557	0.00510792	0.790145
TBACl-LA (1 : 2)	318	492	0.039963	0.469755	0.719617	3.18855	7.69891	3.90967	0.929087	1.68363	1.25537	0.102918	-3.537	-3.58134	-3.57836	-3.53894	-3.49181							Training	-3.56973	0.00508533	0.679158
TBACl-LA (1 : 2)	318	793	0.039963	0.469755	0.719617	3.18855	7.69891	3.90967	0.929087	1.68363	1.25537	0.102918	-3.0694	-3.06892	-3.08427	-3.05876	-3.08443							Training	-3.11516	0.00510701	-0.375682
TBACl-LA (1 : 2)	318	893	0.039963	0.469755	0.719617	3.18855	7.69891	3.90967	0.929087	1.68363	1.25537	0.102918	-2.9542	-2.94069	-2.95912	-2.93438	-2.98552							Training	-2.99611	0.00514431	-0.606104
TBACl-LA (1 : 2)	318	992	0.039963	0.469755	0.719617	3.18855	7.69891	3.90967	0.929087	1.68363	1.25537	0.102918	-2.8544	-2.83002	-2.84967	-2.82457	-2.89499							Testing	-2.88912	0.00519602	-0.476203
TBACl-LA (1 : 2)	318	1292	0.039963	0.469755	0.719617	3.18855	7.69891	3.90967	0.929087	1.68363	1.25537	0.102918	-2.603	-2.57155	-2.58841	-2.56525	-2.64377							Training	-2.61986	0.00544256	-0.0939231
TBACl-LA (1 : 2)	318	1393	0.039963	0.469755	0.719617	3.18855	7.69891	3.90967	0.929087	1.68363	1.25537	0.102918	-2.5401	-2.50384	-2.51967	-2.50033	-2.56366							Training	-2.54354	0.00555596	-0.0257488
TBACl-LA (1 : 2)	318	1493	0.039963	0.469755	0.719617	3.18855	7.69891	3.90967	0.929087	1.68363	1.25537	0.102918	-2.4742	-2.44359	-2.45931	-2.4457	-2.48586							Testing	-2.47279	0.00568332	0.0134002
TBACl-LA (1 : 2)	318	1793	0.039963	0.469755	0.719617	3.18855	7.69891	3.90967	0.929087	1.68363	1.25537	0.102918	-2.303	-2.2911	-2.31613	-2.32902	-2.26036							Testing	-2.27736	0.00615547	0.17569
TBACl-LA (1 : 2)	318	1892	0.039963	0.469755	0.719617	3.18855	7.69891	3.90967	0.929087	1.68363	1.25537	0.102918	-2.252	-2.24703	-2.27922	-2.30264	-2.18846							Training	-2.21544	0.00634093	0.257487
TBACl-LA (1 : 2)	318	1992	0.039963	0.469755	0.719617	3.18855	7.69891	3.90967	0.929087	1.68363	1.25537	0.102918	-2.2048	-2.20454	-2.24629	-2.28049	-2.11712							Training	-2.1532	0.0065432	0.289338
TEACl-LA (1 : 2)	308	97	0.039963	0.469755	0.737263	4.05518	4.19249	1.63704	0.93434	1.66297	1.42168	0.093653	-5.7764	-5.63643	-5.69367	-5.60559	-5.68128							Testing	-5.57973	0.00455524	-0.323317
TEACl-LA (1 : 2)	308	197	0.039963	0.469755	0.737263	4.05518	4.19249	1.63704	0.93434	1.66297	1.42168	0.093653	-4.942	-4.87522	-4.91777	-4.83211	-4.90928							Training	-4.89311	0.00446864	-0.108841
TEACl-LA (1 : 2)	308	294	0.039963	0.469755	0.737263	4.05518	4.19249	1.63704	0.93434	1.66297	1.42168	0.093653	-4.4918	-4.47677	-4.49513	-4.40638	-4.42888							Training	-4.45228	0.00439897	0.135802
TEACl-LA (1 : 2)	308	394	0.039963	0.469755	0.737263	4.05518	4.19249	1.63704	0.93434	1.66297	1.42168	0.093653	-4.1865	-4.20222	-4.19702	-4.12866	-4.09942							Training	-4.15049	0.00434193	0.139903
TEACl-LA (1 : 2)	308	493	0.039963	0.469755	0.737263	4.05518	4.19249	1.63704	0.93434	1.66297	1.42168	0.093653	-3.9555	-3.99045	-3.96834	-3.93297	-3.87283							Training	-3.93717	0.00430026	-0.0244935
TEACl-LA (1 : 2)	308	593	0.039963	0.469755	0.737263	4.05518	4.19249	1.63704	0.93434	1.66297	1.42168	0.093653	-3.7823	-3.80972	-3.77736	-3.77599	-3.7041							Testing	-3.76723	0.00427309	-0.36213
TEACl-LA (1 : 2)	308	693	0.039963	0.469755	0.737263	4.05518	4.19249	1.63704	0.93434	1.66297	1.42168	0.093653	-3.6164	-3.65243	-3.61523	-3.64156	-3.57166							Training	-3.6227	0.00426094	-0.658229
TEACl-LA (1 : 2)	308	793	0.039963	0.469755	0.737263	4.05518	4.19249	1.63704	0.93434	1.66297	1.42168	0.093653	-3.4858	-3.51426	-3.47618	-3.52115	-3.46109							Testing	-3.49464	0.0042638	-1.08218
TEACl-LA (1 : 2)	308	893	0.039963	0.469755	0.737263	4.05518	4.19249	1.63704	0.93434	1.66297	1.42168	0.093653	-3.3633	-3.39244	-3.35655	-3.41082	-3.36387							Testing	-3.3795	0.00428167	-1.17222
TEACl-LA (1 : 2)	308	993	0.039963	0.469755	0.737263	4.05518	4.19249	1.63704	0.93434	1.66297	1.42168	0.093653	-3.2702	-3.28452	-3.25361	-3.30873	-3.27498							Testing	-3.27584	0.00431454	-1.0346
TEACl-LA (1 : 2)	308	1093	0.039963	0.469755	0.737263	4.05518	4.19249	1.63704	0.93434	1.66297	1.42168	0.093653	-3.1898	-3.18811	-3.16507	-3.21396	-3.19147							Training	-3.18277	0.00436244	-0.908311
TEACl-LA (1 : 2)	308	1192	0.039963	0.469755	0.737263	4.05518	4.19249	1.63704	0.93434	1.66297	1.42168	0.093653	-3.102	-3.10186	-3.08958	-3.12685	-3.1124							Training	-3.10008	0.00442463	-0.779668
TEACl-LA (1 : 2)	308	1293	0.039963	0.469755	0.737263	4.05518	4.19249	1.63704	0.93434	1.66297	1.42168	0.093653	-3.0283	-3.02146	-3.02301	-3.04449	-3.03445							Training	-3.02418	0.00450325	-0.685958
TEACl-LA (1 : 2)	308	1392	0.039963	0.469755	0.737263	4.05518	4.19249	1.63704	0.93434	1.66297	1.42168	0.093653	-2.9552	-2.94882	-2.96586	-2.96985	-2.96015							Training	-2.95671	0.00459517	-0.592072
TEACl-LA (1 : 2)	308	1493	0.039963	0.469755	0.737263	4.05518	4.19249	1.63704	0.93434	1.66297	1.42168	0.093653	-2.8889	-2.88027	-2.91313	-2.89962	-2.88621							Training	-2.89348	0.0047041	-0.515858
TEACl-LA (1 : 2)	308	1592	0.039963	0.469755	0.737263	4.05518	4.19249	1.63704	0.93434	1.66297	1.42168	0.093653	-2.8263	-2.81841	-2.8635	-2.83627	-2.81541							Training	-2.8356	0.00482574	-0.446798
TEACl-LA (1 : 2)	308	1692	0.039963	0.469755	0.737263	4.05518	4.19249	1.63704	0.93434	1.66297	1.42168	0.093653	-2.7724	-2.76168	-2.81128	-2.77749	-2.74552							Training	-2.78001	0.00496355	-0.399106
TEACl-LA (1 : 2)	308	1793	0.039963	0.469755	0.737263	4.05518	4.19249	1.63704	0.93434	1.66297	1.42168	0.093653	-2.7186	-2.71107	-2.75283	-2.72313	-2.67657							Testing	-2.72569	0.00511797	-0.38146
TEACl-LA (1 : 2)	308	1893	0.039963	0.469755	0.737263	4.05518	4.19249	1.63704	0.93434	1.66297	1.42168	0.093653	-2.6706	-2.66866	-2.68984	-2.67395	-2.60995							Training	-2.67284	0.00528595	-0.318706
TEACl-LA (1 : 2)	308	1993	0.039963	0.469755	0.737263	4.05518	4.19249	1.63704	0.93434	1.66297	1.42168	0.093653	-2.6238	-2.63506	-2.62856	-2.6291	-2.54499							Training	-2.62024	0.00546893	-0.287802
TEACl-LA (1 : 2)	318	94	0.039963	0.469755	0.737263	4.05518	4.19249	1.63704	0.93434	1.66297	1.42168	0.093653	-5.5623	-5.76157	-5.86059	-5.83172	-5.90231							Training	-5.73746	0.00444921	0.777271
TEACl-LA (1 : 2)	318	193	0.039963	0.469755	0.737263	4.05518	4.19249	1.63704	0.93434	1.66297	1.42168	0.093653	-5.036	-4.99232	-5.0747	-5.05714	-5.13549							Training	-5.05054	0.00435109	0.25098
TEACl-LA (1 : 2)	318	294	0.039963	0.469755	0.737263	4.05518	4.19249	1.63704	0.93434	1.66297	1.42168	0.093653	-4.565	-4.57578	-4.63012	-4.60699	-4.6366							Testing	-4.58916	0.00426614	0.360841
TEACl-LA (1 : 2)	318	393	0.039963	0.469755	0.737263	4.05518	4.19249	1.63704	0.93434	1.66297	1.42168	0.093653	-4.3467	-4.30694	-4.33483	-4.3254	-4.31337							Training	-4.2917	0.00419774	0.210287
TEACl-LA (1 : 2)	318	492	0.039963	0.469755	0.737263	4.05518	4.19249	1.63704	0.93434	1.66297	1.42168	0.093653	-4.0965	-4.09843	-4.10591	-4.12078	-4.08799							Training	-4.07988	0.00414404	0.0912867
TEACl-LA (1 : 2)	318	593	0.039963	0.469755	0.737263	4.05518	4.19249	1.63704	0.93434	1.66297	1.42168	0.093653	-3.9327	-3.9201	-3.91314	-3.95247	-3.9183							Testing	-3.91066	0.00410443	-0.277448
TEACl-LA (1 : 2)	318	692	0.039963	0.469755	0.737263	4.05518	4.19249	1.63704	0.93434	1.66297	1.42168	0.093653	-3.7806	-3.76927	-3.75284	-3.80948	-3.7873							Training	-3.77046	0.00408046	-0.597303
TEACl-LA (1 : 2)	318	793	0.039963	0.469755	0.737263	4.05518	4.19249	1.63704	0.93434	1.66297	1.42168	0.093653	-3.6466	-3.63559	-3.61267	-3.67773	-3.67526							Training	-3.64433	0.00407116	-1.0054
TEACl-LA (1 : 2)	318	892	0.039963	0.469755	0.737263	4.05518	4.19249	1.63704	0.93434	1.66297	1.42168	0.093653	-3.5319	-3.52164	-3.49454	-3.55876	-3.57829							Training	-3.53346	0.00407691	-1.30742
TEACl-LA (1 : 2)	318	993	0.039963	0.469755	0.737263	4.05518	4.19249	1.63704	0.93434	1.66297	1.42168	0.093653	-3.4339	-3.42024	-3.3909	-3.44602	-3.48744							Training	-3.43157	0.00409794	-1.15625
TEACl-LA (1 : 2)	318	1092	0.039963	0.469755	0.737263	4.05518	4.19249	1.63704	0.93434	1.66297	1.42168	0.093653	-3.3385	-3.33286	-3.30353	-3.34316	-3.40344							Training	-3.34153	0.00413341	-1.00964
TEACl-LA (1 : 2)	318	1193	0.039963	0.469755	0.737263	4.05518	4.19249	1.63704	0.93434	1.66297	1.42168	0.093653	-3.2634	-3.25345	-3.22677	-3.24557	-3.32118							Testing	-3.2585	0.00418476	-0.930637
TEACl-LA (1 : 2)	318	1293	0.039963	0.469755	0.737263	4.05518	4.19249	1.63704	0.93434	1.66297	1.42168	0.093653	-3.1932	-3.18229	-3.16092	-3.15593	-3.24218							Training	-3.1837	0.00425069	-0.826385
TEACl-LA (1 : 2)	318	1392	0.039963	0.469755	0.737263	4.05518	4.19249	1.63704	0.93434	1.66297	1.42168	0.093653	-3.1283	-3.11739	-3.10333	-3.07375	-3.16585							Training	-3.11552	0.00433074	-0.751887
TEACl-LA (1 : 2)	318	1492	0.039963	0.469755	0.737263	4.05518	4.19249	1.63704	0.93434	1.66297	1.42168	0.093653	-3.0644	-3.05622	-3.04986	-2.99706	-3.09036							Training	-3.05115	0.00442654	-0.680551
TEACl-LA (1 : 2)	318	1593	0.039963	0.469755	0.737263	4.05518	4.19249	1.63704	0.93434	1.66297	1.42168	0.093653	-2.9927	-2.99828	-2.99674	-2.92576	-3.01562							Training	-2.98939	0.00453854	-0.59157
TEACl-LA (1 : 2)	318	1693	0.039963	0.469755	0.737263	4.05518	4.19249	1.63704	0.93434	1.66297	1.42168	0.093653	-2.9475	-2.94468	-2.94073	-2.86091	-2.94306							Testing	-2.93028	0.00466451	-0.5893
TEACl-LA (1 : 2)	318	1793	0.039963	0.469755	0.737263	4.05518	4.19249	1.63704	0.93434	1.66297	1.42168	0.093653	-2.8892	-2.89535	-2.87888	-2.80145	-2.87194							Training	-2.87224	0.00480549	-0.506353
TEACl-LA (1 : 2)	318	1892	0.039963	0.469755	0.737263	4.05518	4.19249	1.63704	0.93434	1.66297	1.42168	0.093653	-2.8399	-2.85164	-2.81475	-2.74756	-2.80296							Training	-2.81512	0.00495984	-0.46874
TEACl-LA (1 : 2)	318	1992	0.039963	0.469755	0.737263	4.05518	4.19249	1.63704	0.93434	1.66297	1.42168	0.093653	-2.7902	-2.81387	-2.75543	-2.69781	-2.73477							Testing	-2.75724	0.0051307	-0.458449
TMACl-LA (1 : 2)	308	98	0.039963	0.469755	0.979394	3.37737	3.27759	1.06878	0.940528	1.70309	1.39931	0.01088	-6.0076	-5.89802	-5.8236	-5.86143	-5.91114							Training	-5.90864	0.00531417	-0.586831
TMACl-LA (1 : 2)	308	194	0.039963	0.469755	0.979394	3.37737	3.27759	1.06878	0.940528	1.70309	1.39931	0.01088	-5.1743	-5.16766	-5.11202	-5.11313	-5.16158							Training	-5.24442	0.0051651	-0.333589
TMACl-LA (1 : 2)	308	295	0.039963	0.469755	0.979394	3.37737	3.27759	1.06878	0.940528	1.70309	1.39931	0.01088	-4.7537	-4.73928	-4.69546	-4.6462	-4.65197							Training	-4.7713	0.0050232	-0.194636
TMACl-LA (1 : 2)	308	393	0.039963	0.469755	0.979394	3.37737	3.27759	1.06878	0.940528	1.70309	1.39931	0.01088	-4.4245	-4.45735	-4.42098	-4.34908	-4.32237							Testing	-4.45514	0.00490016	-0.15325
TMACl-LA (1 : 2)	308	493	0.039963	0.469755	0.979394	3.37737	3.27759	1.06878	0.940528	1.70309	1.39931	0.01088	-4.2037	-4.23135	-4.20156	-4.12695	-4.0864							Testing	-4.21426	0.00478946	-0.345101
TMACl-LA (1 : 2)	308	592	0.039963	0.469755	0.979394	3.37737	3.27759	1.06878	0.940528	1.70309	1.39931	0.01088	-4.0041	-4.04296	-4.01902	-3.95188	-3.91315							Training	-4.02118	0.00469466	-0.554001
TMACl-LA (1 : 2)	308	692	0.039963	0.469755	0.979394	3.37737	3.27759	1.06878	0.940528	1.70309	1.39931	0.01088	-3.8378	-3.87843	-3.859	-3.80312	-3.77516							Training	-3.8541	0.00461383	-0.878553
TMACl-LA (1 : 2)	308	793	0.039963	0.469755	0.979394	3.37737	3.27759	1.06878	0.940528	1.70309	1.39931	0.01088	-3.6993	-3.73402	-3.71689	-3.67299	-3.65901							Training	-3.70582	0.00454744	-1.27601
TMACl-LA (1 : 2)	308	893	0.039963	0.469755	0.979394	3.37737	3.27759	1.06878	0.940528	1.70309	1.39931	0.01088	-3.5852	-3.60969	-3.59226	-3.55956	-3.55845							Training	-3.57592	0.00449678	-1.45173
TMACl-LA (1 : 2)	308	993	0.039963	0.469755	0.979394	3.37737	3.27759	1.06878	0.940528	1.70309	1.39931	0.01088	-3.4841	-3.50146	-3.48131	-3.45859	-3.46726							Testing	-3.46125	0.00446114	-1.30301
TMACl-LA (1 : 2)	308	1093	0.039963	0.469755	0.979394	3.37737	3.27759	1.06878	0.940528	1.70309	1.39931	0.01088	-3.3835	-3.40698	-3.38217	-3.36783	-3.38252							Testing	-3.36073	0.00444051	-1.148
TMACl-LA (1 : 2)	308	1192	0.039963	0.469755	0.979394	3.37737	3.27759	1.06878	0.940528	1.70309	1.39931	0.01088	-3.3004	-3.32478	-3.29411	-3.28605	-3.30332							Testing	-3.27404	0.00443487	-1.03277
TMACl-LA (1 : 2)	308	1292	0.039963	0.469755	0.979394	3.37737	3.27759	1.06878	0.940528	1.70309	1.39931	0.01088	-3.2309	-3.25113	-3.21402	-3.20977	-3.22711							Testing	-3.1982	0.00444411	-0.949857
TMACl-LA (1 : 2)	308	1392	0.039963	0.469755	0.979394	3.37737	3.27759	1.06878	0.940528	1.70309	1.39931	0.01088	-3.1663	-3.18503	-3.14169	-3.13829	-3.15415							Training	-3.13282	0.00446836	-0.859231
TMACl-LA (1 : 2)	308	1492	0.039963	0.469755	0.979394	3.37737	3.27759	1.06878	0.940528	1.70309	1.39931	0.01088	-3.1062	-3.12485	-3.07611	-3.07037	-3.08417							Testing	-3.07655	0.00450762	-0.81717
TMACl-LA (1 : 2)	308	1593	0.039963	0.469755	0.979394	3.37737	3.27759	1.06878	0.940528	1.70309	1.39931	0.01088	-3.0316	-3.06863	-3.01583	-3.0045	-3.01636							Testing	-3.02764	0.00456251	-0.723213
TMACl-LA (1 : 2)	308	1692	0.039963	0.469755	0.979394	3.37737	3.27759	1.06878	0.940528	1.70309	1.39931	0.01088	-2.9761	-3.01678	-2.96181	-2.94207	-2.95266							Training	-2.98622	0.00463118	-0.648769
TMACl-LA (1 : 2)	308	1793	0.039963	0.469755	0.979394	3.37737	3.27759	1.06878	0.940528	1.70309	1.39931	0.01088	-2.9268	-2.96623	-2.91121	-2.88027	-2.89047							Training	-2.9495	0.00471639	-0.612751
TMACl-LA (1 : 2)	308	1892	0.039963	0.469755	0.979394	3.37737	3.27759	1.06878	0.940528	1.70309	1.39931	0.01088	-2.881	-2.91816	-2.86548	-2.82147	-2.83227							Testing	-2.91793	0.00481477	-0.607893
TMACl-LA (1 : 2)	308	1992	0.039963	0.469755	0.979394	3.37737	3.27759	1.06878	0.940528	1.70309	1.39931	0.01088	-2.8331	-2.87045	-2.82268	-2.76386	-2.7763							Testing	-2.88962	0.00492909	-0.575045
TMACl-LA (1 : 2)	318	95	0.039963	0.469755	0.979394	3.37737	3.27759	1.06878	0.940528	1.70309	1.39931	0.01088	-6.0748	-6.03632	-6.02755	-6.16435	-6.15621							Training	-6.02009	0.00522979	-0.181529
TMACl-LA (1 : 2)	318	194	0.039963	0.469755	0.979394	3.37737	3.27759	1.06878	0.940528	1.70309	1.39931	0.01088	-5.2419	-5.27369	-5.28497	-5.39234	-5.38658							Testing	-5.33506	0.00506397	-0.0191546
TMACl-LA (1 : 2)	318	293	0.039963	0.469755	0.979394	3.37737	3.27759	1.06878	0.940528	1.70309	1.39931	0.01088	-4.8171	-4.85108	-4.87492	-4.93112	-4.89045							Testing	-4.87402	0.00491287	0.0736774
TMACl-LA (1 : 2)	318	393	0.039963	0.469755	0.979394	3.37737	3.27759	1.06878	0.940528	1.70309	1.39931	0.01088	-4.5621	-4.56096	-4.59368	-4.62034	-4.55572							Training	-4.55526	0.00477518	-0.0030285
TMACl-LA (1 : 2)	318	493	0.039963	0.469755	0.979394	3.37737	3.27759	1.06878	0.940528	1.70309	1.39931	0.01088	-4.3245	-4.33322	-4.37406	-4.38918	-4.32122							Training	-4.32024	0.0046525	-0.158998
TMACl-LA (1 : 2)	318	593	0.039963	0.469755	0.979394	3.37737	3.27759	1.06878	0.940528	1.70309	1.39931	0.01088	-4.1477	-4.1412	-4.18963	-4.20195	-4.14692							Testing	-4.13208	0.00454483	-0.48565
TMACl-LA (1 : 2)	318	692	0.039963	0.469755	0.979394	3.37737	3.27759	1.06878	0.940528	1.70309	1.39931	0.01088	-3.9707	-3.97662	-4.03116	-4.0436	-4.01028							Testing	-3.97414	0.00445302	-0.771993
TMACl-LA (1 : 2)	318	792	0.039963	0.469755	0.979394	3.37737	3.27759	1.06878	0.940528	1.70309	1.39931	0.01088	-3.8467	-3.83179	-3.89024	-3.90327	-3.89453							Testing	-3.83506	0.00437522	-1.18823
TMACl-LA (1 : 2)	318	893	0.039963	0.469755	0.979394	3.37737	3.27759	1.06878	0.940528	1.70309	1.39931	0.01088	-3.731	-3.70455	-3.76418	-3.77771	-3.79185							Testing	-3.71174	0.00431188	-1.55257
TMACl-LA (1 : 2)	318	992	0.039963	0.469755	0.979394	3.37737	3.27759	1.06878	0.940528	1.70309	1.39931	0.01088	-3.6291	-3.59598	-3.65419	-3.66827	-3.70022							Training	-3.60568	0.00426466	-1.38502
TMACl-LA (1 : 2)	318	1093	0.039963	0.469755	0.979394	3.37737	3.27759	1.06878	0.940528	1.70309	1.39931	0.01088	-3.5429	-3.49932	-3.55394	-3.56888	-3.61301							Training	-3.51118	0.00423164	-1.26175
TMACl-LA (1 : 2)	318	1193	0.039963	0.469755	0.979394	3.37737	3.27759	1.06878	0.940528	1.70309	1.39931	0.01088	-3.4502	-3.4154	-3.46499	-3.4811	-3.53124							Testing	-3.4299	0.00421403	-1.13623
TMACl-LA (1 : 2)	318	1292	0.039963	0.469755	0.979394	3.37737	3.27759	1.06878	0.940528	1.70309	1.39931	0.01088	-3.3799	-3.34179	-3.38571	-3.40293	-3.45384							Training	-3.3601	0.00421139	-1.03506
TMACl-LA (1 : 2)	318	1393	0.039963	0.469755	0.979394	3.37737	3.27759	1.06878	0.940528	1.70309	1.39931	0.01088	-3.3113	-3.27449	-3.31267	-3.33037	-3.37798							Training	-3.2984	0.00422385	-0.953404
TMACl-LA (1 : 2)	318	1493	0.039963	0.469755	0.979394	3.37737	3.27759	1.06878	0.940528	1.70309	1.39931	0.01088	-3.2486	-3.21394	-3.24713	-3.26398	-3.3057							Testing	-3.24536	0.00425128	-0.903468
TMACl-LA (1 : 2)	318	1593	0.039963	0.469755	0.979394	3.37737	3.27759	1.06878	0.940528	1.70309	1.39931	0.01088	-3.1881	-3.15799	-3.18748	-3.20153	-3.2361							Training	-3.19902	0.00429372	-0.821608
TMACl-LA (1 : 2)	318	1692	0.039963	0.469755	0.979394	3.37737	3.27759	1.06878	0.940528	1.70309	1.39931	0.01088	-3.1311	-3.10596	-3.13347	-3.14246	-3.16979							Training	-3.15857	0.00435052	-0.765789
TMACl-LA (1 : 2)	318	1792	0.039963	0.469755	0.979394	3.37737	3.27759	1.06878	0.940528	1.70309	1.39931	0.01088	-3.0894	-3.0558	-3.08338	-3.08479	-3.10545							Training	-3.12213	0.00442282	-0.746943
TMACl-LA (1 : 2)	318	1892	0.039963	0.469755	0.979394	3.37737	3.27759	1.06878	0.940528	1.70309	1.39931	0.01088	-3.0384	-3.00722	-3.03721	-3.02866	-3.04378							Training	-3.08919	0.00451014	-0.706107
TMACl-LA (1 : 2)	318	1993	0.039963	0.469755	0.979394	3.37737	3.27759	1.06878	0.940528	1.70309	1.39931	0.01088	-2.9892	-2.95907	-2.99407	-2.97331	-2.98424							Testing	-3.05866	0.00461357	-0.6931
TEMACl-AC (1 : 2)	298.15	198	0.042768	0.338019	0.330311	3.69016	4.15324	0.987102	0.760853	1.3458	1.31651	0.01326	-5.0302	-4.96276	-5.01092	-4.99037	-4.76286							Testing	-4.59428	0.00736246	-1.04535
TEMACl-AC (1 : 2)	298.15	413	0.042768	0.338019	0.330311	3.69016	4.15324	0.987102	0.760853	1.3458	1.31651	0.01326	-4.176	-4.1571	-4.19348	-4.14095	-3.93203							Testing	-3.83586	0.00715319	-0.609617
TEMACl-AC (1 : 2)	298.15	806	0.042768	0.338019	0.330311	3.69016	4.15324	0.987102	0.760853	1.3458	1.31651	0.01326	-3.4137	-3.39923	-3.42858	-3.45457	-3.34748							Testing	-3.2335	0.00695001	-1.60801
TEMACl-AC (1 : 2)	298.15	1155	0.042768	0.338019	0.330311	3.69016	4.15324	0.987102	0.760853	1.3458	1.31651	0.01326	-3.0499	-2.98922	-3.03095	-3.04183	-3.05526							Testing	-2.90745	0.00696394	-1.12928
TEMACl-AC (1 : 2)	298.15	1410	0.042768	0.338019	0.330311	3.69016	4.15324	0.987102	0.760853	1.3458	1.31651	0.01326	-2.7848	-2.77966	-2.81863	-2.7959	-2.87153							Testing	-2.71533	0.00708971	-0.714145
TEMACl-AC (1 : 2)	298.15	1624	0.042768	0.338019	0.330311	3.69016	4.15324	0.987102	0.760853	1.3458	1.31651	0.01326	-2.6024	-2.63899	-2.63917	-2.61748	-2.72664							Training	-2.56909	0.00727059	-0.431188
TEMACl-AC (1 : 2)	298.15	1837	0.042768	0.338019	0.330311	3.69016	4.15324	0.987102	0.760853	1.3458	1.31651	0.01326	-2.4394	-2.51895	-2.45681	-2.46068	-2.58907							Training	-2.43175	0.00751889	-0.215655
TEMACl-EG (1 : 2)	298.15	138	0	0.258588	0.637541	3.77064	4.22647	1.12075	0.550082	0.885619	1.85524	0.01326	-5.2796	-5.10064	-5.10438	-5.18837	-5.17672							Training	-5.15626	0.0110654	0.00112718
TEMACl-EG (1 : 2)	298.15	314	0	0.258588	0.637541	3.77064	4.22647	1.12075	0.550082	0.885619	1.85524	0.01326	-4.1247	-4.19431	-4.21962	-4.18336	-4.23558							Training	-4.2281	0.0108178	0.803684
TEMACl-EG (1 : 2)	298.15	543	0	0.258588	0.637541	3.77064	4.22647	1.12075	0.550082	0.885619	1.85524	0.01326	-3.4898	-3.66064	-3.66606	-3.64007	-3.66863							Training	-3.5866	0.0105653	0.661194
TEMACl-EG (1 : 2)	298.15	802	0	0.258588	0.637541	3.77064	4.22647	1.12075	0.550082	0.885619	1.85524	0.01326	-3.2788	-3.28437	-3.29003	-3.29413	-3.33422							Testing	-3.10875	0.0103745	-0.721111
TEMACl-EG (1 : 2)	298.15	1041	0	0.258588	0.637541	3.77064	4.22647	1.12075	0.550082	0.885619	1.85524	0.01326	-3.0937	-3.07665	-3.08762	-3.07048	-3.1196							Testing	-2.76946	0.0102878	-0.588801
TEMACl-EG (1 : 2)	298.15	1345	0	0.258588	0.637541	3.77064	4.22647	1.12075	0.550082	0.885619	1.85524	0.01326	-3.0127	-2.96314	-2.95644	-2.86805	-2.89668							Testing	-2.43282	0.0103014	-0.638724
TEMACl-GLY (1 : 2)	298.15	150	0.002706	0.234267	0.667439	4.53387	4.42595	1.185	0.751019	1.14837	1.91437	0.01326	-6.3532	-6.38746	-6.34982	-6.39085	-6.11624							Testing	-6.13881	0.00843582	-2.83266
TEMACl-GLY (1 : 2)	298.15	420	0.002706	0.234267	0.667439	4.53387	4.42595	1.185	0.751019	1.14837	1.91437	0.01326	-5.1131	-5.15191	-5.14151	-5.17035	-4.92616							Training	-4.9576	0.00817462	-2.40998
TEMACl-GLY (1 : 2)	298.15	833	0.002706	0.234267	0.667439	4.53387	4.42595	1.185	0.751019	1.14837	1.91437	0.01326	-4.3612	-4.19518	-4.25853	-4.3381	-4.25673							Testing	-4.12266	0.00798679	-3.4021
TEMACl-GLY (1 : 2)	298.15	1238	0.002706	0.234267	0.667439	4.53387	4.42595	1.185	0.751019	1.14837	1.91437	0.01326	-3.6354	-3.61782	-3.62949	-3.63874	-3.86349							Testing	-3.59674	0.00805125	-2.03634
TEMACl-GLY (1 : 2)	298.15	1648	0.002706	0.234267	0.667439	4.53387	4.42595	1.185	0.751019	1.14837	1.91437	0.01326	-3.1574	-3.26741	-3.21057	-3.07444	-3.53592							Training	-3.24233	0.00836729	-1.23724
TEMACl-LA (1 : 2)	298.15	143	0.039963	0.469755	0.720569	3.7453	4.25821	1.40854	0.966113	1.72669	1.37532	0.01326	-5.3524	-5.49391	-5.50418	-5.59906	-5.65488							Training	-5.53534	0.00564609	-0.674033
TEMACl-LA (1 : 2)	298.15	418	0.039963	0.469755	0.720569	3.7453	4.25821	1.40854	0.966113	1.72669	1.37532	0.01326	-4.5174	-4.38058	-4.41743	-4.46241	-4.37697							Testing	-4.38829	0.0053615	-1.3143
TEMACl-LA (1 : 2)	298.15	938	0.039963	0.469755	0.720569	3.7453	4.25821	1.40854	0.966113	1.72669	1.37532	0.01326	-3.6446	-3.55832	-3.59088	-3.69387	-3.615							Testing	-3.54139	0.00513365	-2.16677
TEMACl-LA (1 : 2)	298.15	1265	0.039963	0.469755	0.720569	3.7453	4.25821	1.40854	0.966113	1.72669	1.37532	0.01326	-3.3237	-3.29574	-3.29517	-3.33197	-3.32225							Testing	-3.22118	0.00519824	-1.67859
TEMACl-LA (1 : 2)	298.15	1500	0.039963	0.469755	0.720569	3.7453	4.25821	1.40854	0.966113	1.72669	1.37532	0.01326	-3.1268	-3.1739	-3.1408	-3.10227	-3.1306							Training	-3.04714	0.00534378	-1.3974
TEMACl-LA (1 : 2)	298.15	1863	0.039963	0.469755	0.720569	3.7453	4.25821	1.40854	0.966113	1.72669	1.37532	0.01326	-2.9736	-3.04598	-2.94825	-2.79159	-2.85454							Testing	-2.83179	0.00573152	-1.33459
TEMACl-LEV (1 : 2)	298.15	136	0	0	0.303317	5.96214	4.92339	1.18061	0.910244	1.848	1.53649	0.01326	-5.0033	-5.03614	-5.13516	-5.06862	-5.05177							Training	-5.12634	0.00485281	-0.216133
TEMACl-LEV (1 : 2)	298.15	409	0	0	0.303317	5.96214	4.92339	1.18061	0.910244	1.848	1.53649	0.01326	-3.965	-3.90951	-3.95964	-3.95446	-3.91554							Testing	-3.95047	0.00487828	-0.482889
TEMACl-LEV (1 : 2)	298.15	735	0	0	0.303317	5.96214	4.92339	1.18061	0.910244	1.848	1.53649	0.01326	-3.3391	-3.30381	-3.31938	-3.38926	-3.39974							Testing	-3.38912	0.00505525	-1.326
TEMACl-LEV (1 : 2)	298.15	1043	0	0	0.303317	5.96214	4.92339	1.18061	0.910244	1.848	1.53649	0.01326	-3.0059	-2.97488	-2.95402	-3.00363	-3.08894							Training	-3.04286	0.00536901	-1.10684
TEMACl-LEV (1 : 2)	298.15	1617	0	0	0.303317	5.96214	4.92339	1.18061	0.910244	1.848	1.53649	0.01326	-2.6914	-2.78125	-2.60303	-2.48539	-2.57642							Training	-2.59716	0.00633373	-0.820992
[Gua]Cl-EA (1 : 2)	298.15	226	0.01785	0.7854	0.975008	1.51059	3.21312	1.44097	0.682389	0.876801	1.52235	0.012342	-3.8294	-3.78084	-3.66535	-3.6567	-3.74457							Training	-3.84199	0.0151415	2.5694
[Gua]Cl-EA (1 : 2)	298.15	563	0.01785	0.7854	0.975008	1.51059	3.21312	1.44097	0.682389	0.876801	1.52235	0.012342	-2.8715	-2.93042	-2.97219	-2.90446	-2.7837							Testing	-2.99286	0.0144682	2.33211
[Gua]Cl-EA (1 : 2)	298.15	836	0.01785	0.7854	0.975008	1.51059	3.21312	1.44097	0.682389	0.876801	1.52235	0.012342	-2.5376	-2.5954	-2.69076	-2.69394	-2.54739							Training	-2.67223	0.0140477	1.24545
[Gua]Cl-EA (1 : 2)	298.15	1129	0.01785	0.7854	0.975008	1.51059	3.21312	1.44097	0.682389	0.876801	1.52235	0.012342	-2.4119	-2.39956	-2.49092	-2.52892	-2.4257							Testing	-2.46007	0.013721	1.1788
[Gua]Cl-EA (1 : 2)	298.15	1480	0.01785	0.7854	0.975008	1.51059	3.21312	1.44097	0.682389	0.876801	1.52235	0.012342	-2.3625	-2.30346	-2.33297	-2.36675	-2.34871							Training	-2.31211	0.0134992	1.07592
[Gua]Cl-EA (1 : 2)	298.15	1787	0.01785	0.7854	0.975008	1.51059	3.21312	1.44097	0.682389	0.876801	1.52235	0.012342	-2.3027	-2.27725	-2.23697	-2.24616	-2.32012							Training	-2.22842	0.0134568	0.972484
[Gua]Cl-EA (1 : 2)	298.15	2025	0.01785	0.7854	0.975008	1.51059	3.21312	1.44097	0.682389	0.876801	1.52235	0.012342	-2.2286	-2.26291	-2.17827	-2.16237	-2.31908							Training	-2.17228	0.0135212	0.957882
[Ch]Cl-EA (1 : 2)	308.2	651	0	0	1.09505	3.6505	3.72387	0.913669	0.632443	1.04168	1.79172	0.013634	-2.9957	-3.06937	-3.06279	-3.04651	-2.84665							Training	-3.05652	0.00633591	1.64663
[Ch]Cl-EA (1 : 2)	308.2	1527	0	0	1.09505	3.6505	3.72387	0.913669	0.632443	1.04168	1.79172	0.013634	-2.3539	-2.39972	-2.26868	-2.35987	-2.36485							Training	-2.30639	0.00630906	1.19623
[Ch]Cl-EA (1 : 2)	308.2	2453	0	0	1.09505	3.6505	3.72387	0.913669	0.632443	1.04168	1.79172	0.013634	-1.9878	-2.05737	-1.99301	-2.03124	-2.01237							Testing	-2.05462	0.00753305	1.26146
[Ch]Cl-EA (1 : 2)	308.2	3445	0	0	1.09505	3.6505	3.72387	0.913669	0.632443	1.04168	1.79172	0.013634	-1.7487	-1.78779	-1.65292	-1.83246	-1.73715							Testing	-1.83776	0.0102723	1.0401
[Ch]Cl-EA (1 : 2)	308.2	4376	0	0	1.09505	3.6505	3.72387	0.913669	0.632443	1.04168	1.79172	0.013634	-1.6348	-1.64008	-1.5466	-1.63939	-1.55955							Training	-1.5927	0.0141868	0.624407
[Ch]Cl-EA (1 : 2)	318.2	706	0	0	1.09505	3.6505	3.72387	0.913669	0.632443	1.04168	1.79172	0.013634	-3.1236	-3.04751	-3.10888	-3.06855	-3.0341							Testing	-3.05369	0.00697474	1.3282
[Ch]Cl-EA (1 : 2)	318.2	1661	0	0	1.09505	3.6505	3.72387	0.913669	0.632443	1.04168	1.79172	0.013634	-2.386	-2.38472	-2.34485	-2.34312	-2.47455							Testing	-2.30399	0.00696648	1.20222
[Ch]Cl-EA (1 : 2)	318.2	2618	0	0	1.09505	3.6505	3.72387	0.913669	0.632443	1.04168	1.79172	0.013634	-2.0636	-2.04478	-2.02974	-2.02898	-2.07526							Training	-2.05469	0.00833152	1.26201
[Ch]Cl-EA (1 : 2)	318.2	3527	0	0	1.09505	3.6505	3.72387	0.913669	0.632443	1.04168	1.79172	0.013634	-1.7838	-1.81063	-1.7645	-1.8576	-1.80021							Training	-1.87122	0.0109012	1.19865
[Ch]Cl-EA (1 : 2)	318.2	4504	0	0	1.09505	3.6505	3.72387	0.913669	0.632443	1.04168	1.79172	0.013634	-1.6713	-1.66507	-1.64594	-1.64937	-1.59442							Testing	-1.65949	0.015046	0.63611
[Ch]Cl-EA (1 : 2)	328.2	692	0	0	1.09505	3.6505	3.72387	0.913669	0.632443	1.04168	1.79172	0.013634	-3.1701	-3.11668	-3.2638	-3.17529	-3.27359							Testing	-3.17379	0.00784849	1.75224
[Ch]Cl-EA (1 : 2)	328.2	1691	0	0	1.09505	3.6505	3.72387	0.913669	0.632443	1.04168	1.79172	0.013634	-2.4304	-2.41512	-2.46839	-2.37674	-2.62193							Training	-2.36948	0.00773211	1.38349
[Ch]Cl-EA (1 : 2)	328.2	2544	0	0	1.09505	3.6505	3.72387	0.913669	0.632443	1.04168	1.79172	0.013634	-2.1371	-2.10983	-2.18546	-2.08159	-2.22071							Testing	-2.12444	0.00881841	1.33337
[Ch]Cl-EA (1 : 2)	328.2	3577	0	0	1.09505	3.6505	3.72387	0.913669	0.632443	1.04168	1.79172	0.013634	-1.8579	-1.84152	-1.88215	-1.88644	-1.86789							Testing	-1.92596	0.0115962	1.17291
[Ch]Cl-EA (1 : 2)	328.2	4499	0	0	1.09505	3.6505	3.72387	0.913669	0.632443	1.04168	1.79172	0.013634	-1.743	-1.70596	-1.76475	-1.69771	-1.65017							Training	-1.76124	0.0154283	0.769414
[TBA]Cl-DECA (1 : 2)	298.15	90	0.032505	0.342837	0.330547	2.70157	13.8496	8.0354	0.826424	1.26796	1.1764	0.102918	-4.3901	-4.36622	-4.45804	-4.44731	-4.43023							Testing	-4.43077	0.0037786	0.650288
[TBA]Cl-DECA (1 : 2)	298.15	190	0.032505	0.342837	0.330547	2.70157	13.8496	8.0354	0.826424	1.26796	1.1764	0.102918	-3.6613	-3.64834	-3.70817	-3.68602	-3.71054							Testing	-3.73312	0.00371924	0.586189
[TBA]Cl-DECA (1 : 2)	298.15	290	0.032505	0.342837	0.330547	2.70157	13.8496	8.0354	0.826424	1.26796	1.1764	0.102918	-3.2468	-3.24236	-3.27561	-3.24976	-3.24222							Training	-3.2719	0.00367489	0.596127
[TBA]Cl-DECA (1 : 2)	298.15	390	0.032505	0.342837	0.330547	2.70157	13.8496	8.0354	0.826424	1.26796	1.1764	0.102918	-2.9508	-2.96259	-2.97371	-2.96859	-2.92455							Training	-2.96595	0.00364556	0.57824
[TBA]Cl-DECA (1 : 2)	298.15	490	0.032505	0.342837	0.330547	2.70157	13.8496	8.0354	0.826424	1.26796	1.1764	0.102918	-2.7288	-2.74238	-2.73761	-2.76303	-2.69753							Testing	-2.74691	0.00363123	0.341894
[TBA]Cl-DECA (1 : 2)	298.15	690	0.032505	0.342837	0.330547	2.70157	13.8496	8.0354	0.826424	1.26796	1.1764	0.102918	-2.4024	-2.39819	-2.38209	-2.45187	-2.38706							Testing	-2.42851	0.00364761	-0.308843
[TBA]Cl-DECA (1 : 2)	298.15	790	0.032505	0.342837	0.330547	2.70157	13.8496	8.0354	0.826424	1.26796	1.1764	0.102918	-2.2759	-2.25998	-2.24774	-2.32197	-2.26975							Testing	-2.30021	0.00367832	-0.62172
[TBA]Cl-DECA (1 : 2)	298.15	990	0.032505	0.342837	0.330547	2.70157	13.8496	8.0354	0.826424	1.26796	1.1764	0.102918	-2.0675	-2.03495	-2.04407	-2.09418	-2.07148							Testing	-2.08357	0.00378477	-0.295015
[TBA]Cl-DECA (1 : 2)	298.15	1190	0.032505	0.342837	0.330547	2.70157	13.8496	8.0354	0.826424	1.26796	1.1764	0.102918	-1.8951	-1.8628	-1.89717	-1.90166	-1.90039							Training	-1.91115	0.00395126	-0.0161475
[TBA]Cl-DECA (1 : 2)	298.15	1490	0.032505	0.342837	0.330547	2.70157	13.8496	8.0354	0.826424	1.26796	1.1764	0.102918	-1.6858	-1.67041	-1.71749	-1.66884	-1.67379							Training	-1.71453	0.00431358	0.239475
[TBA]Cl-DECA (1 : 2)	298.15	1790	0.032505	0.342837	0.330547	2.70157	13.8496	8.0354	0.826424	1.26796	1.1764	0.102918	-1.5237	-1.52492	-1.55435	-1.49048	-1.47544							Testing	-1.56354	0.00481099	0.340042
[TBA]Cl-DECA (1 : 2)	298.15	1990	0.032505	0.342837	0.330547	2.70157	13.8496	8.0354	0.826424	1.26796	1.1764	0.102918	-1.4296	-1.44259	-1.45435	-1.39525	-1.35797							Testing	-1.47667	0.00521765	0.401798
[TBA]Cl-DECA (1 : 2)	308.15	90	0.032505	0.342837	0.330547	2.70157	13.8496	8.0354	0.826424	1.26796	1.1764	0.102918	-4.5952	-4.52584	-4.5665	-4.54302	-4.55865							Testing	-4.52789	0.00358863	0.675378
[TBA]Cl-DECA (1 : 2)	308.15	190	0.032505	0.342837	0.330547	2.70157	13.8496	8.0354	0.826424	1.26796	1.1764	0.102918	-3.8304	-3.80744	-3.82078	-3.80821	-3.84455							Testing	-3.83296	0.00351729	0.694727
[TBA]Cl-DECA (1 : 2)	308.15	290	0.032505	0.342837	0.330547	2.70157	13.8496	8.0354	0.826424	1.26796	1.1764	0.102918	-3.3962	-3.4003	-3.39344	-3.38866	-3.37855							Testing	-3.37405	0.00346096	0.6355
[TBA]Cl-DECA (1 : 2)	308.15	390	0.032505	0.342837	0.330547	2.70157	13.8496	8.0354	0.826424	1.26796	1.1764	0.102918	-3.1078	-3.11901	-3.09834	-3.11858	-3.06127							Testing	-3.0701	0.00341964	0.600347
[TBA]Cl-DECA (1 : 2)	308.15	490	0.032505	0.342837	0.330547	2.70157	13.8496	8.0354	0.826424	1.26796	1.1764	0.102918	-2.886	-2.89713	-2.87066	-2.92044	-2.83347							Testing	-2.85306	0.00339333	0.410814
[TBA]Cl-DECA (1 : 2)	308.15	690	0.032505	0.342837	0.330547	2.70157	13.8496	8.0354	0.826424	1.26796	1.1764	0.102918	-2.5536	-2.54967	-2.53408	-2.61636	-2.51974							Testing	-2.53921	0.00338574	-0.226016
[TBA]Cl-DECA (1 : 2)	308.15	790	0.032505	0.342837	0.330547	2.70157	13.8496	8.0354	0.826424	1.26796	1.1764	0.102918	-2.4236	-2.41002	-2.40725	-2.48686	-2.40043							Training	-2.41332	0.00340446	-0.604273
[TBA]Cl-DECA (1 : 2)	308.15	990	0.032505	0.342837	0.330547	2.70157	13.8496	8.0354	0.826424	1.26796	1.1764	0.102918	-2.21	-2.18273	-2.20625	-2.2546	-2.19798							Testing	-2.2008	0.00348694	-0.380763
[TBA]Cl-DECA (1 : 2)	308.15	1190	0.032505	0.342837	0.330547	2.70157	13.8496	8.0354	0.826424	1.26796	1.1764	0.102918	-2.041	-2.00909	-2.04457	-2.05189	-2.02291							Testing	-2.03034	0.00362946	-0.145388
[TBA]Cl-DECA (1 : 2)	308.15	1490	0.032505	0.342837	0.330547	2.70157	13.8496	8.0354	0.826424	1.26796	1.1764	0.102918	-1.8313	-1.81565	-1.83569	-1.79679	-1.7913							Training	-1.8315	0.00395582	0.144917
[TBA]Cl-DECA (1 : 2)	308.15	1790	0.032505	0.342837	0.330547	2.70157	13.8496	8.0354	0.826424	1.26796	1.1764	0.102918	-1.6644	-1.67004	-1.65595	-1.5929	-1.58954							Training	-1.67314	0.00441728	0.300288
[TBA]Cl-DECA (1 : 2)	308.15	1990	0.032505	0.342837	0.330547	2.70157	13.8496	8.0354	0.826424	1.26796	1.1764	0.102918	-1.5712	-1.58793	-1.55076	-1.48115	-1.47085							Training	-1.57948	0.00479998	0.361152
[TBA]Cl-DECA (1 : 2)	323.15	90	0.032505	0.342837	0.330547	2.70157	13.8496	8.0354	0.826424	1.26796	1.1764	0.102918	-4.756	-4.76312	-4.74883	-4.64997	-4.76137							Testing	-4.72682	0.00365499	1.05341
[TBA]Cl-DECA (1 : 2)	323.15	190	0.032505	0.342837	0.330547	2.70157	13.8496	8.0354	0.826424	1.26796	1.1764	0.102918	-4.0286	-4.04403	-4.01497	-3.95611	-4.05608							Testing	-4.03322	0.00356567	0.986069
[TBA]Cl-DECA (1 : 2)	323.15	290	0.032505	0.342837	0.330547	2.70157	13.8496	8.0354	0.826424	1.26796	1.1764	0.102918	-3.6082	-3.63522	-3.60093	-3.56392	-3.59409							Training	-3.5751	0.00349136	0.846591
[TBA]Cl-DECA (1 : 2)	323.15	390	0.032505	0.342837	0.330547	2.70157	13.8496	8.0354	0.826424	1.26796	1.1764	0.102918	-3.3104	-3.3517	-3.31986	-3.31338	-3.27794							Testing	-3.27164	0.00343206	0.780684
[TBA]Cl-DECA (1 : 2)	323.15	490	0.032505	0.342837	0.330547	2.70157	13.8496	8.0354	0.826424	1.26796	1.1764	0.102918	-3.0835	-3.12734	-3.10496	-3.12954	-3.04961							Training	-3.05524	0.00338778	0.651691
[TBA]Cl-DECA (1 : 2)	323.15	690	0.032505	0.342837	0.330547	2.70157	13.8496	8.0354	0.826424	1.26796	1.1764	0.102918	-2.7504	-2.77496	-2.78008	-2.84231	-2.73234							Testing	-2.74403	0.00334423	-0.0322339
[TBA]Cl-DECA (1 : 2)	323.15	790	0.032505	0.342837	0.330547	2.70157	13.8496	8.0354	0.826424	1.26796	1.1764	0.102918	-2.6255	-2.63315	-2.64903	-2.71618	-2.61073							Training	-2.61992	0.00334498	-0.41867
[TBA]Cl-DECA (1 : 2)	323.15	990	0.032505	0.342837	0.330547	2.70157	13.8496	8.0354	0.826424	1.26796	1.1764	0.102918	-2.4068	-2.40239	-2.42364	-2.48188	-2.40354							Testing	-2.41049	0.0033915	-0.470095
[TBA]Cl-DECA (1 : 2)	323.15	1190	0.032505	0.342837	0.330547	2.70157	13.8496	8.0354	0.826424	1.26796	1.1764	0.102918	-2.2293	-2.22648	-2.23243	-2.26734	-2.22413							Testing	-2.24092	0.00349807	-0.215017
[TBA]Cl-DECA (1 : 2)	323.15	1490	0.032505	0.342837	0.330547	2.70157	13.8496	8.0354	0.826424	1.26796	1.1764	0.102918	-2.0219	-2.03145	-1.99425	-1.98237	-1.9876							Training	-2.03793	0.0037705	0.0684568
[TBA]Cl-DECA (1 : 2)	323.15	1790	0.032505	0.342837	0.330547	2.70157	13.8496	8.0354	0.826424	1.26796	1.1764	0.102918	-1.8579	-1.88566	-1.80204	-1.74259	-1.78333							Testing	-1.87007	0.00417802	0.176785
[TBA]Cl-DECA (1 : 2)	323.15	1990	0.032505	0.342837	0.330547	2.70157	13.8496	8.0354	0.826424	1.26796	1.1764	0.102918	-1.7626	-1.8039	-1.69305	-1.60727	-1.66434							Testing	-1.76809	0.00452476	0.241322
[TOMA]Cl-DECA (1 : 2)	298.15	90	0.032505	0.342837	0.319089	2.62978	17.9589	10.5389	0.973083	1.37232	1.20185	0.022338	-4.32	-4.37396	-4.32408	-4.37471	-4.34224							Testing	-4.33203	0.00817196	0.0574042
[TOMA]Cl-DECA (1 : 2)	298.15	190	0.032505	0.342837	0.319089	2.62978	17.9589	10.5389	0.973083	1.37232	1.20185	0.022338	-3.5405	-3.58866	-3.58126	-3.56853	-3.61957							Testing	-3.65672	0.00802116	0.110828
[TOMA]Cl-DECA (1 : 2)	298.15	290	0.032505	0.342837	0.319089	2.62978	17.9589	10.5389	0.973083	1.37232	1.20185	0.022338	-3.1893	-3.15903	-3.17343	-3.1137	-3.15427							Training	-3.2071	0.00788537	-0.115579
[TOMA]Cl-DECA (1 : 2)	298.15	390	0.032505	0.342837	0.319089	2.62978	17.9589	10.5389	0.973083	1.37232	1.20185	0.022338	-2.8806	-2.87183	-2.89798	-2.82791	-2.84321							Training	-2.90165	0.00776459	-0.103438
[TOMA]Cl-DECA (1 : 2)	298.15	490	0.032505	0.342837	0.319089	2.62978	17.9589	10.5389	0.973083	1.37232	1.20185	0.022338	-2.6722	-2.6502	-2.68435	-2.62531	-2.62493							Training	-2.67684	0.00765882	-0.328448
[TOMA]Cl-DECA (1 : 2)	298.15	790	0.032505	0.342837	0.319089	2.62978	17.9589	10.5389	0.973083	1.37232	1.20185	0.022338	-2.2118	-2.17142	-2.22047	-2.21104	-2.2289							Testing	-2.20761	0.00743158	-1.14745
[TOMA]Cl-DECA (1 : 2)	298.15	990	0.032505	0.342837	0.319089	2.62978	17.9589	10.5389	0.973083	1.37232	1.20185	0.022338	-2.004	-1.94878	-1.99999	-2.00374	-2.05301							Training	-1.98136	0.00735515	-0.801942
[TOMA]Cl-DECA (1 : 2)	298.15	1490	0.032505	0.342837	0.319089	2.62978	17.9589	10.5389	0.973083	1.37232	1.20185	0.022338	-1.6342	-1.58679	-1.62704	-1.6144	-1.70858							Testing	-1.60475	0.00742674	-0.355856
[TOMA]Cl-DECA (1 : 2)	298.15	1990	0.032505	0.342837	0.319089	2.62978	17.9589	10.5389	0.973083	1.37232	1.20185	0.022338	-1.3771	-1.361	-1.39196	-1.35759	-1.43811							Training	-1.37849	0.00787361	-0.11719
[TOMA]Cl-DECA (1 : 2)	308.15	90	0.032505	0.342837	0.319089	2.62978	17.9589	10.5389	0.973083	1.37232	1.20185	0.022338	-4.4918	-4.55706	-4.45742	-4.54085	-4.43039							Testing	-4.41998	0.00863485	0.159684
[TOMA]Cl-DECA (1 : 2)	308.15	190	0.032505	0.342837	0.319089	2.62978	17.9589	10.5389	0.973083	1.37232	1.20185	0.022338	-3.7339	-3.77076	-3.71433	-3.75231	-3.71295							Training	-3.74985	0.00847206	0.20295
[TOMA]Cl-DECA (1 : 2)	308.15	290	0.032505	0.342837	0.319089	2.62978	17.9589	10.5389	0.973083	1.37232	1.20185	0.022338	-3.3215	-3.33949	-3.30574	-3.305	-3.24963							Testing	-3.30579	0.00832429	-0.0223692
[TOMA]Cl-DECA (1 : 2)	308.15	390	0.032505	0.342837	0.319089	2.62978	17.9589	10.5389	0.973083	1.37232	1.20185	0.022338	-3.0449	-3.05031	-3.02942	-3.02114	-2.93865							Testing	-3.00641	0.00819152	-0.0848751
[TOMA]Cl-DECA (1 : 2)	308.15	490	0.032505	0.342837	0.319089	2.62978	17.9589	10.5389	0.973083	1.37232	1.20185	0.022338	-2.8201	-2.82657	-2.81491	-2.81709	-2.71936							Testing	-2.78834	0.00807377	-0.267454
[TOMA]Cl-DECA (1 : 2)	308.15	790	0.032505	0.342837	0.319089	2.62978	17.9589	10.5389	0.973083	1.37232	1.20185	0.022338	-2.3434	-2.34189	-2.34857	-2.38688	-2.31779							Training	-2.34254	0.00781058	-1.19546
[TOMA]Cl-DECA (1 : 2)	308.15	990	0.032505	0.342837	0.319089	2.62978	17.9589	10.5389	0.973083	1.37232	1.20185	0.022338	-2.1371	-2.11623	-2.12666	-2.1631	-2.13793							Testing	-2.13164	0.00771017	-0.886092
[TOMA]Cl-DECA (1 : 2)	308.15	1490	0.032505	0.342837	0.319089	2.62978	17.9589	10.5389	0.973083	1.37232	1.20185	0.022338	-1.7597	-1.74979	-1.75073	-1.72549	-1.78611							Training	-1.77815	0.00772185	-0.3736
[TOMA]Cl-DECA (1 : 2)	308.15	1990	0.032505	0.342837	0.319089	2.62978	17.9589	10.5389	0.973083	1.37232	1.20185	0.022338	-1.5046	-1.52214	-1.51338	-1.42562	-1.51376							Training	-1.54991	0.00810879	-0.169188
[TOMA]Br-DECA (1 : 2)	298.15	90	0.032505	0.342837	0.375716	2.70267	17.8588	10.4367	0.94675	1.49969	1.28882	0	-4.2687	-4.2395	-4.25291	-4.35739	-4.40289							Testing	-4.29975	0.00640174	0.246507
[TOMA]Br-DECA (1 : 2)	298.15	190	0.032505	0.342837	0.375716	2.70267	17.8588	10.4367	0.94675	1.49969	1.28882	0	-3.5899	-3.54089	-3.56912	-3.60979	-3.68677							Training	-3.63548	0.00626663	0.104486
[TOMA]Br-DECA (1 : 2)	298.15	290	0.032505	0.342837	0.375716	2.70267	17.8588	10.4367	0.94675	1.49969	1.28882	0	-3.1869	-3.14741	-3.17781	-3.16909	-3.22096							Training	-3.19217	0.00614654	-0.0365966
[TOMA]Br-DECA (1 : 2)	298.15	390	0.032505	0.342837	0.375716	2.70267	17.8588	10.4367	0.94675	1.49969	1.28882	0	-2.8986	-2.87795	-2.90519	-2.87711	-2.90516							Training	-2.88857	0.00604146	-0.07269
[TOMA]Br-DECA (1 : 2)	298.15	490	0.032505	0.342837	0.375716	2.70267	17.8588	10.4367	0.94675	1.49969	1.28882	0	-2.6593	-2.66715	-2.69039	-2.66003	-2.6796							Training	-2.66317	0.00595138	-0.22464
[TOMA]Br-DECA (1 : 2)	298.15	790	0.032505	0.342837	0.375716	2.70267	17.8588	10.4367	0.94675	1.49969	1.28882	0	-2.2055	-2.20834	-2.22244	-2.19971	-2.25485							Testing	-2.18892	0.00577123	-1.04799
[TOMA]Br-DECA (1 : 2)	298.15	990	0.032505	0.342837	0.375716	2.70267	17.8588	10.4367	0.94675	1.49969	1.28882	0	-1.9936	-1.99413	-2.00343	-1.97433	-2.05776							Testing	-1.95855	0.00572618	-0.713172
[TOMA]Br-DECA (1 : 2)	298.15	1490	0.032505	0.342837	0.375716	2.70267	17.8588	10.4367	0.94675	1.49969	1.28882	0	-1.62	-1.64028	-1.65148	-1.59558	-1.65995							Testing	-1.56495	0.00587625	-0.238086
[TOMA]Br-DECA (1 : 2)	298.15	1990	0.032505	0.342837	0.375716	2.70267	17.8588	10.4367	0.94675	1.49969	1.28882	0	-1.3595	-1.40758	-1.46028	-1.43169	-1.3388							Training	-1.31855	0.00640159	0.0109762
[TOMA]Br-DECA (1 : 2)	298.15	90	0.032505	0.342837	0.375716	2.70267	17.8588	10.4367	0.94675	1.49969	1.28882	0	-4.4145	-4.2395	-4.25291	-4.35739	-4.40289							Training	-4.29975	0.00640174	-0.0566423
[TOMA]Br-DECA (1 : 2)	308.15	190	0.032505	0.342837	0.375716	2.70267	17.8588	10.4367	0.94675	1.49969	1.28882	0	-3.7214	-3.67531	-3.67713	-3.73488	-3.776							Testing	-3.72379	0.00613281	0.262203
[TOMA]Br-DECA (1 : 2)	308.15	290	0.032505	0.342837	0.375716	2.70267	17.8588	10.4367	0.94675	1.49969	1.28882	0	-3.3132	-3.2802	-3.28539	-3.29745	-3.31197							Testing	-3.28539	0.00600073	0.0687392
[TOMA]Br-DECA (1 : 2)	308.15	390	0.032505	0.342837	0.375716	2.70267	17.8588	10.4367	0.94675	1.49969	1.28882	0	-3.0078	-3.00881	-3.01225	-3.00385	-2.99611							Testing	-2.98736	0.00588366	0.0729922
[TOMA]Br-DECA (1 : 2)	308.15	490	0.032505	0.342837	0.375716	2.70267	17.8588	10.4367	0.94675	1.49969	1.28882	0	-2.7839	-2.79599	-2.79693	-2.78254	-2.76945							Training	-2.76834	0.0057816	-0.0772607
[TOMA]Br-DECA (1 : 2)	308.15	790	0.032505	0.342837	0.375716	2.70267	17.8588	10.4367	0.94675	1.49969	1.28882	0	-2.3259	-2.33164	-2.32757	-2.30659	-2.33898							Testing	-2.31699	0.00556549	-1.08251
[TOMA]Br-DECA (1 : 2)	308.15	990	0.032505	0.342837	0.375716	2.70267	17.8588	10.4367	0.94675	1.49969	1.28882	0	-2.1186	-2.11466	-2.10777	-2.07622	-2.13786							Training	-2.10206	0.00549648	-0.736887
[TOMA]Br-DECA (1 : 2)	308.15	1490	0.032505	0.342837	0.375716	2.70267	17.8588	10.4367	0.94675	1.49969	1.28882	0	-1.7458	-1.757	-1.75417	-1.70513	-1.73287							Testing	-1.73376	0.00558662	-0.285123
[TOMA]Br-DECA (1 : 2)	308.15	1990	0.032505	0.342837	0.375716	2.70267	17.8588	10.4367	0.94675	1.49969	1.28882	0	-1.4859	-1.52303	-1.5616	-1.53575	-1.41025							Testing	-1.48762	0.00605204	-0.0735957
[TOMA]Br-DECA (1 : 2)	323.15	90	0.032505	0.342837	0.375716	2.70267	17.8588	10.4367	0.94675	1.49969	1.28882	0	-4.5375	-4.58304	-4.52745	-4.65474	-4.62494							Training	-4.54036	0.00644843	0.928869
[TOMA]Br-DECA (1 : 2)	323.15	190	0.032505	0.342837	0.375716	2.70267	17.8588	10.4367	0.94675	1.49969	1.28882	0	-3.8728	-3.88186	-3.84354	-3.94156	-3.9216							Testing	-3.88557	0.00628337	0.662027
[TOMA]Br-DECA (1 : 2)	323.15	290	0.032505	0.342837	0.375716	2.70267	17.8588	10.4367	0.94675	1.49969	1.28882	0	-3.49	-3.48434	-3.45115	-3.51295	-3.46075							Testing	-3.45302	0.00613331	0.308881
[TOMA]Br-DECA (1 : 2)	323.15	390	0.032505	0.342837	0.375716	2.70267	17.8588	10.4367	0.94675	1.49969	1.28882	0	-3.1583	-3.21008	-3.17721	-3.22062	-3.14538							Training	-3.16163	0.00599826	0.418234
[TOMA]Br-DECA (1 : 2)	323.15	490	0.032505	0.342837	0.375716	2.70267	17.8588	10.4367	0.94675	1.49969	1.28882	0	-2.9375	-2.99422	-2.96108	-2.99588	-2.91767							Testing	-2.95016	0.00587823	0.182247
[TOMA]Br-DECA (1 : 2)	323.15	790	0.032505	0.342837	0.375716	2.70267	17.8588	10.4367	0.94675	1.49969	1.28882	0	-2.5035	-2.52145	-2.48957	-2.49478	-2.48077							Training	-2.52445	0.00560819	-0.904564
[TOMA]Br-DECA (1 : 2)	323.15	990	0.032505	0.342837	0.375716	2.70267	17.8588	10.4367	0.94675	1.49969	1.28882	0	-2.2877	-2.30023	-2.26855	-2.24549	-2.27524							Training	-2.32479	0.00550322	-0.762513
[TOMA]Br-DECA (1 : 2)	323.15	1490	0.032505	0.342837	0.375716	2.70267	17.8588	10.4367	0.94675	1.49969	1.28882	0	-1.9112	-1.93668	-1.91239	-1.85885	-1.86374							Testing	-1.97206	0.00550348	-0.301669
[TOMA]Br-DECA (1 : 2)	323.15	1990	0.032505	0.342837	0.375716	2.70267	17.8588	10.4367	0.94675	1.49969	1.28882	0	-1.6597	-1.70071	-1.7177	-1.68334	-1.5419							Testing	-1.7088	0.00587901	-0.109613
[Ch]Cl-EG (1 : 2)	303.15	643.6	0	0.258588	1.09617	3.85012	2.89392	0.776026	0.72151	1.1821	1.88577	0.001292	-3.6382	-3.62936	-3.65082	-3.63717	-3.71079							Training	-3.66949	0.00321376	0.200736
[Ch]Cl-EG (1 : 2)	303.15	734.2	0	0.258588	1.09617	3.85012	2.89392	0.776026	0.72151	1.1821	1.88577	0.001292	-3.4999	-3.48797	-3.49778	-3.52122	-3.58623							Training	-3.52754	0.00313744	-0.122551
[Ch]Cl-EG (1 : 2)	303.15	823.9	0	0.258588	1.09617	3.85012	2.89392	0.776026	0.72151	1.1821	1.88577	0.001292	-3.3785	-3.36452	-3.36344	-3.41706	-3.47776							Testing	-3.40001	0.00307401	-0.505859
[Ch]Cl-EG (1 : 2)	303.15	1046.2	0	0.258588	1.09617	3.85012	2.89392	0.776026	0.72151	1.1821	1.88577	0.001292	-3.135	-3.11999	-3.09011	-3.19132	-3.24621							Training	-3.13203	0.00296887	-0.153
[Ch]Cl-EG (1 : 2)	303.15	1246.2	0	0.258588	1.09617	3.85012	2.89392	0.776026	0.72151	1.1821	1.88577	0.001292	-2.9584	-2.95832	-2.90085	-3.01837	-3.06402							Training	-2.94327	0.00293767	0.105056
[TBA]Br-EG (1 : 2)	303.15	412	0	0.258588	0.675162	3.42475	7.74339	3.45944	0.536414	0.990696	1.92273	0.002703	-4.1931	-4.24412	-4.25707	-4.20174	-4.17768							Training	-4.22428	0.00597272	-0.458592
[TBA]Br-EG (1 : 2)	303.15	774.8	0	0.258588	0.675162	3.42475	7.74339	3.45944	0.536414	0.990696	1.92273	0.002703	-3.5032	-3.52345	-3.49869	-3.54488	-3.66581							Testing	-3.50528	0.00575934	-1.43923
[TBA]Br-EG (1 : 2)	303.15	887.6	0	0.258588	0.675162	3.42475	7.74339	3.45944	0.536414	0.990696	1.92273	0.002703	-3.4907	-3.36337	-3.33378	-3.39029	-3.572							Training	-3.34052	0.00573326	-1.75382
[TBA]Br-EG (1 : 2)	303.15	1060.9	0	0.258588	0.675162	3.42475	7.74339	3.45944	0.536414	0.990696	1.92273	0.002703	-3.1489	-3.16391	-3.12503	-3.17926	-3.45176							Testing	-3.12046	0.00573041	-1.09853
[TBA]Br-EG (1 : 2)	303.15	1291.1	0	0.258588	0.675162	3.42475	7.74339	3.45944	0.536414	0.990696	1.92273	0.002703	-2.9243	-2.96861	-2.91266	-2.94139	-3.3201							Testing	-2.87829	0.00579634	-0.757887
[TBA]Br-DEG (1 : 2)	303.15	720.8	0	0.095766	0.722055	3.93931	9.88625	3.80304	0.626603	1.30951	2.0341	0.002703	-3.3962	-3.24764	-3.30418	-3.32708	-3.25059							Testing	-3.41254	0.00848255	-1.26281
[TBA]Br-DEG (1 : 2)	303.15	962.5	0	0.095766	0.722055	3.93931	9.88625	3.80304	0.626603	1.30951	2.0341	0.002703	-2.9077	-2.86639	-2.90895	-2.9467	-2.96791							Testing	-3.06274	0.00862696	-0.786039
[TBA]Br-DEG (1 : 2)	303.15	1005	0	0.095766	0.722055	3.93931	9.88625	3.80304	0.626603	1.30951	2.0341	0.002703	-2.8251	-2.81082	-2.84354	-2.88641	-2.9235							Training	-3.00874	0.00866142	-0.603718
[TBA]Br-DEG (1 : 2)	303.15	1096.3	0	0.095766	0.722055	3.93931	9.88625	3.80304	0.626603	1.30951	2.0341	0.002703	-2.6437	-2.70144	-2.71191	-2.76308	-2.83178							Testing	-2.89933	0.00874461	-0.278694
[TBA]Br-DEG (1 : 2)	303.15	1392.5	0	0.095766	0.722055	3.93931	9.88625	3.80304	0.626603	1.30951	2.0341	0.002703	-2.3096	-2.42267	-2.40061	-2.41806	-2.56131							Testing	-2.59811	0.00910064	0.264171
[TBA]Br-methyldiethanol amine (1 : 2)	303.15	610.5	0	0.003663	0.482937	3.90423	11.0451	4.07545	0.56849	1.03366	2.09631	0.004749	-3.0705	-2.92876	-2.96711	-3.05462	-2.77634							Testing	-2.72773	0.0130858	0.0373195
[TBA]Br-methyldiethanol amine (1 : 2)	303.15	734.6	0	0.003663	0.482937	3.90423	11.0451	4.07545	0.56849	1.03366	2.09631	0.004749	-2.7121	-2.70591	-2.72618	-2.77885	-2.63598							Training	-2.56207	0.0131657	0.0313875
[TBA]Br-methyldiethanol amine (1 : 2)	303.15	823	0	0.003663	0.482937	3.90423	11.0451	4.07545	0.56849	1.03366	2.09631	0.004749	-2.5797	-2.56799	-2.5716	-2.5989	-2.55064							Training	-2.45943	0.0132367	-0.0996883
[TBA]Br-methyldiethanol amine (1 : 2)	303.15	930.6	0	0.003663	0.482937	3.90423	11.0451	4.07545	0.56849	1.03366	2.09631	0.004749	-2.3147	-2.42162	-2.39584	-2.39772	-2.45732							Training	-2.34825	0.013339	0.441071
[TBA]Br-methyldiethanol amine (1 : 2)	303.15	1011.2	0	0.003663	0.482937	3.90423	11.0451	4.07545	0.56849	1.03366	2.09631	0.004749	-2.2838	-2.32617	-2.26895	-2.25952	-2.3928							Training	-2.27352	0.013427	0.449853
[TBA]Br-Decanoic acid (1 : 2)	303.15	488	0.032505	0.342837	0.36912	2.91242	13.9258	7.87296	0.849782	1.4161	1.36384	0.002703	-2.8577	-2.82087	-2.89441	-2.82545	-2.83926							Testing	-2.84911	0.00440942	0.335604
[TBA]Br-Decanoic acid (1 : 2)	303.15	564	0.032505	0.342837	0.36912	2.91242	13.9258	7.87296	0.849782	1.4161	1.36384	0.002703	-2.6564	-2.67962	-2.74214	-2.68865	-2.70039							Testing	-2.70663	0.00436774	0.267433
[TBA]Br-Decanoic acid (1 : 2)	303.15	654	0.032505	0.342837	0.36912	2.91242	13.9258	7.87296	0.849782	1.4161	1.36384	0.002703	-2.4889	-2.53195	-2.58341	-2.54398	-2.56337							Testing	-2.56149	0.0043296	0.0223981
[TBA]Br-Decanoic acid (1 : 2)	303.15	771	0.032505	0.342837	0.36912	2.91242	13.9258	7.87296	0.849782	1.4161	1.36384	0.002703	-2.3849	-2.36616	-2.40553	-2.37502	-2.41389							Training	-2.39988	0.00429819	-0.534379
[TBA]Br-Decanoic acid (1 : 2)	303.15	914	0.032505	0.342837	0.36912	2.91242	13.9258	7.87296	0.849782	1.4161	1.36384	0.002703	-2.2118	-2.19692	-2.22383	-2.18991	-2.25762							Testing	-2.23336	0.00428771	-0.351925
[TBA]Br-Decanoic acid (1 : 2)	303.15	1004	0.032505	0.342837	0.36912	2.91242	13.9258	7.87296	0.849782	1.4161	1.36384	0.002703	-2.1062	-2.10613	-2.12628	-2.08322	-2.16857							Training	-2.14269	0.00429686	-0.144414
[TBA]Br-Decanoic acid (1 : 2)	303.15	1117	0.032505	0.342837	0.36912	2.91242	13.9258	7.87296	0.849782	1.4161	1.36384	0.002703	-2.0318	-2.00637	-2.01928	-1.95834	-2.06366							Testing	-2.04177	0.00432555	-0.0933971
[TBA]Br-Decanoic acid (1 : 2)	313.15	470	0.032505	0.342837	0.36912	2.91242	13.9258	7.87296	0.849782	1.4161	1.36384	0.002703	-3.0619	-3.06029	-3.05055	-3.05272	-2.99177							Training	-3.00394	0.00413784	0.467337
[TBA]Br-Decanoic acid (1 : 2)	313.15	607	0.032505	0.342837	0.36912	2.91242	13.9258	7.87296	0.849782	1.4161	1.36384	0.002703	-2.8002	-2.80564	-2.7797	-2.81012	-2.745							Testing	-2.76341	0.00404886	0.0648358
[TBA]Br-Decanoic acid (1 : 2)	313.15	653	0.032505	0.342837	0.36912	2.91242	13.9258	7.87296	0.849782	1.4161	1.36384	0.002703	-2.7426	-2.73105	-2.70074	-2.73742	-2.67693							Testing	-2.69556	0.0040253	-0.125334
[TBA]Br-Decanoic acid (1 : 2)	313.15	736	0.032505	0.342837	0.36912	2.91242	13.9258	7.87296	0.849782	1.4161	1.36384	0.002703	-2.577	-2.60801	-2.57077	-2.6137	-2.56635							Training	-2.58469	0.00399083	-0.295384
[TBA]Br-Decanoic acid (1 : 2)	313.15	841	0.032505	0.342837	0.36912	2.91242	13.9258	7.87296	0.849782	1.4161	1.36384	0.002703	-2.4546	-2.47125	-2.42648	-2.46806	-2.44252							Training	-2.46154	0.00396204	-0.588719
[TBA]Br-Decanoic acid (1 : 2)	313.15	1030	0.032505	0.342837	0.36912	2.91242	13.9258	7.87296	0.849782	1.4161	1.36384	0.002703	-2.2692	-2.26917	-2.21334	-2.2296	-2.24727							Testing	-2.27663	0.00395192	-0.331104
[TBA]Br-Decanoic acid (1 : 2)	313.15	1138	0.032505	0.342837	0.36912	2.91242	13.9258	7.87296	0.849782	1.4161	1.36384	0.002703	-2.1839	-2.17424	-2.11358	-2.10444	-2.14584							Testing	-2.18751	0.00397022	-0.217817
[TBA]Br-Hexanoic acid (1 : 2)	303.15	474	0.035112	0.340164	0.367668	2.91922	11.0371	5.56748	0.790316	1.41389	1.36697	0.002703	-2.9604	-2.97932	-2.92214	-2.93351	-3.01898							Training	-2.95571	0.00509578	0.822429
[TBA]Br-Hexanoic acid (1 : 2)	303.15	543	0.035112	0.340164	0.367668	2.91922	11.0371	5.56748	0.790316	1.41389	1.36697	0.002703	-2.7774	-2.85205	-2.81092	-2.81303	-2.88756							Training	-2.82387	0.00507322	0.759866
[TBA]Br-Hexanoic acid (1 : 2)	303.15	629	0.035112	0.340164	0.367668	2.91922	11.0371	5.56748	0.790316	1.41389	1.36697	0.002703	-2.678	-2.71166	-2.68879	-2.68054	-2.75021							Training	-2.68278	0.00505509	0.37762
[TBA]Br-Hexanoic acid (1 : 2)	303.15	722	0.035112	0.340164	0.367668	2.91922	11.0371	5.56748	0.790316	1.41389	1.36697	0.002703	-2.537	-2.57871	-2.5729	-2.55255	-2.62393							Testing	-2.55096	0.00504799	0.00670932
[TBA]Br-Hexanoic acid (1 : 2)	303.15	825	0.035112	0.340164	0.367668	2.91922	11.0371	5.56748	0.790316	1.41389	1.36697	0.002703	-2.4338	-2.45093	-2.46069	-2.42441	-2.50157							Training	-2.42366	0.00505528	-0.302716
[TBA]Br-Hexanoic acid (1 : 2)	303.15	1058	0.035112	0.340164	0.367668	2.91922	11.0371	5.56748	0.790316	1.41389	1.36697	0.002703	-2.1777	-2.22255	-2.25761	-2.17471	-2.26296							Training	-2.18805	0.00513052	0.116994
[TBA]Br-Hexanoic acid (1 : 2)	303.15	1103	0.035112	0.340164	0.367668	2.91922	11.0371	5.56748	0.790316	1.41389	1.36697	0.002703	-2.1111	-2.18632	-2.22527	-2.13196	-2.2207							Testing	-2.14904	0.00515444	0.197966
[TBA]Br-Hexanoic acid (1 : 2)	313.15	444	0.035112	0.340164	0.367668	2.91922	11.0371	5.56748	0.790316	1.41389	1.36697	0.002703	-3.1845	-3.19853	-3.15707	-3.1933	-3.22251							Testing	-3.16395	0.00468776	0.895306
[TBA]Br-Hexanoic acid (1 : 2)	313.15	534	0.035112	0.340164	0.367668	2.91922	11.0371	5.56748	0.790316	1.41389	1.36697	0.002703	-3.02	-3.02496	-2.99673	-3.02878	-3.04046							Testing	-2.98863	0.00464491	0.643317
[TBA]Br-Hexanoic acid (1 : 2)	313.15	657	0.035112	0.340164	0.367668	2.91922	11.0371	5.56748	0.790316	1.41389	1.36697	0.002703	-2.8117	-2.8244	-2.81209	-2.83757	-2.84442							Training	-2.79551	0.004606	0.302512
[TBA]Br-Hexanoic acid (1 : 2)	313.15	809	0.035112	0.340164	0.367668	2.91922	11.0371	5.56748	0.790316	1.41389	1.36697	0.002703	-2.6283	-2.62157	-2.62513	-2.63269	-2.64978							Training	-2.60227	0.0045893	-0.354841
[TBA]Br-Hexanoic acid (1 : 2)	313.15	942	0.035112	0.340164	0.367668	2.91922	11.0371	5.56748	0.790316	1.41389	1.36697	0.002703	-2.471	-2.47695	-2.49143	-2.4729	-2.50301							Training	-2.46046	0.00460313	-0.234515
[TBA]Br-Hexanoic acid (1 : 2)	313.15	1056	0.035112	0.340164	0.367668	2.91922	11.0371	5.56748	0.790316	1.41389	1.36697	0.002703	-2.4079	-2.37284	-2.39522	-2.34774	-2.38749							Training	-2.35367	0.00463612	-0.176235
[TBA]Br-Hexanoic acid (1 : 2)	313.15	1110	0.035112	0.340164	0.367668	2.91922	11.0371	5.56748	0.790316	1.41389	1.36697	0.002703	-2.3392	-2.32892	-2.3548	-2.29193	-2.33514							Testing	-2.30691	0.00465855	-0.0916772
[TBA]Br-Hexanoic acid (1 : 2)	323.15	480	0.035112	0.340164	0.367668	2.91922	11.0371	5.56748	0.790316	1.41389	1.36697	0.002703	-3.3077	-3.28702	-3.25335	-3.32999	-3.28645							Testing	-3.27189	0.00443215	0.789717
[TBA]Br-Hexanoic acid (1 : 2)	323.15	558	0.035112	0.340164	0.367668	2.91922	11.0371	5.56748	0.790316	1.41389	1.36697	0.002703	-3.1327	-3.1424	-3.11505	-3.19344	-3.13885							Testing	-3.1331	0.00438917	0.646508
[TBA]Br-Hexanoic acid (1 : 2)	323.15	653	0.035112	0.340164	0.367668	2.91922	11.0371	5.56748	0.790316	1.41389	1.36697	0.002703	-2.9858	-2.98805	-2.96831	-3.0445	-2.98859							Testing	-2.98999	0.00434916	0.318539
[TBA]Br-Hexanoic acid (1 : 2)	323.15	745	0.035112	0.340164	0.367668	2.91922	11.0371	5.56748	0.790316	1.41389	1.36697	0.002703	-2.87	-2.85758	-2.8448	-2.91227	-2.86335							Training	-2.87001	0.00432333	-0.024972
[TBA]Br-Hexanoic acid (1 : 2)	323.15	834	0.035112	0.340164	0.367668	2.91922	11.0371	5.56748	0.790316	1.41389	1.36697	0.002703	-2.7969	-2.74675	-2.74012	-2.79258	-2.7546							Testing	-2.76657	0.00431043	-0.517229
[TBA]Br-Hexanoic acid (1 : 2)	323.15	959	0.035112	0.340164	0.367668	2.91922	11.0371	5.56748	0.790316	1.41389	1.36697	0.002703	-2.7016	-2.61303	-2.61411	-2.63555	-2.61531							Testing	-2.63701	0.00431239	-0.569098
[TBA]Br-Hexanoic acid (1 : 2)	323.15	1105	0.035112	0.340164	0.367668	2.91922	11.0371	5.56748	0.790316	1.41389	1.36697	0.002703	-2.5434	-2.48379	-2.49301	-2.46652	-2.46548							Training	-2.503	0.00434437	-0.286226
[BHDE]Cl-Acetic acid (1 : 2)	298.15	210	0.042768	0.338019	0.677587	3.94407	3.54552	1.96829	1.17042	1.72881	1.05855	0.001003	-4.9458	-4.8899	-4.91024	-4.92544	-4.88497							Training	-5.04717	0.00393578	-1.00287
[BHDE]Cl-Acetic acid (1 : 2)	298.15	533	0.042768	0.338019	0.677587	3.94407	3.54552	1.96829	1.17042	1.72881	1.05855	0.001003	-3.8263	-3.89831	-3.86349	-3.89638	-3.79696							Training	-3.90477	0.00360502	-0.674254
[BHDE]Cl-Acetic acid (1 : 2)	298.15	857	0.042768	0.338019	0.677587	3.94407	3.54552	1.96829	1.17042	1.72881	1.05855	0.001003	-3.3858	-3.35609	-3.31243	-3.36336	-3.34855							Testing	-3.30173	0.00343057	-1.69074
[BHDE]Cl-Acetic acid (1 : 2)	298.15	1167	0.042768	0.338019	0.677587	3.94407	3.54552	1.96829	1.17042	1.72881	1.05855	0.001003	-3.0104	-3.01084	-2.97069	-2.99258	-3.04329							Testing	-2.87729	0.00341118	-1.06293
[BHDE]Cl-Acetic acid (1 : 2)	298.15	1440	0.042768	0.338019	0.677587	3.94407	3.54552	1.96829	1.17042	1.72881	1.05855	0.001003	-2.7334	-2.78789	-2.7644	-2.74901	-2.80349							Training	-2.60649	0.00351355	-0.610331
[BHDE]Cl-Acetic acid (1 : 2)	298.15	1771	0.042768	0.338019	0.677587	3.94407	3.54552	1.96829	1.17042	1.72881	1.05855	0.001003	-2.5279	-2.55878	-2.59243	-2.53883	-2.53248							Training	-2.37747	0.00378772	-0.388416
[BHDE]Cl-Acetic acid (1 : 2)	298.15	2026	0.042768	0.338019	0.677587	3.94407	3.54552	1.96829	1.17042	1.72881	1.05855	0.001003	-2.4508	-2.38066	-2.49894	-2.42521	-2.33648							Testing	-2.25214	0.0041111	-0.437374
[BHDE]Cl-Lactic acid (1 : 2)	298.15	283	0.039963	0.469755	1.06784	3.99921	3.6505	2.38973	1.37568	2.1097	1.11736	0.001003	-6.1625	-6.02028	-6.00526	-5.9326	-5.96991							Training	-5.8786	0.0109405	-4.27931
[BHDE]Cl-Lactic acid (1 : 2)	298.15	516	0.039963	0.469755	1.06784	3.99921	3.6505	2.38973	1.37568	2.1097	1.11736	0.001003	-5.1775	-5.18732	-5.1878	-5.16101	-5.12251							Testing	-5.11922	0.0107061	-3.58756
[BHDE]Cl-Lactic acid (1 : 2)	298.15	866	0.039963	0.469755	1.06784	3.99921	3.6505	2.38973	1.37568	2.1097	1.11736	0.001003	-4.145	-4.29599	-4.28923	-4.31952	-4.39473							Testing	-4.36897	0.0105071	-3.28624
[BHDE]Cl-Lactic acid (1 : 2)	298.15	1134	0.039963	0.469755	1.06784	3.99921	3.6505	2.38973	1.37568	2.1097	1.11736	0.001003	-3.769	-3.786	-3.79847	-3.81122	-3.94531							Training	-3.88561	0.0104791	-2.64008
[BHDE]Cl-Lactic acid (1 : 2)	298.15	1458	0.039963	0.469755	1.06784	3.99921	3.6505	2.38973	1.37568	2.1097	1.11736	0.001003	-3.338	-3.31941	-3.33596	-3.35045	-3.43343							Testing	-3.42969	0.0105892	-1.87846
[BHDE]Cl-Lactic acid (1 : 2)	298.15	1722	0.039963	0.469755	1.06784	3.99921	3.6505	2.38973	1.37568	2.1097	1.11736	0.001003	-3.0146	-3.03251	-3.04555	-3.06915	-3.03092							Training	-3.1651	0.0107953	-1.3253
[BHDE]Cl-Lactic acid (1 : 2)	298.15	2086	0.039963	0.469755	1.06784	3.99921	3.6505	2.38973	1.37568	2.1097	1.11736	0.001003	-2.7861	-2.73649	-2.74689	-2.7702	-2.49766							Testing	-2.92701	0.0112512	-1.09015
[Ch]Cl-Phenol (1 : 2)	313.15	1990	0.031878	0.365013	0.762537	4.21038	2.74955	2.429	2.1419	0.939945	1.24956	0.001292	-2.4304	-2.44192	-2.49389	-2.5371	-2.63934							Training	-2.44981	0.00419005	0.46752
[Ch]Cl-Phenol (1 : 2)	313.15	3460	0.031878	0.365013	0.762537	4.21038	2.74955	2.429	2.1419	0.939945	1.24956	0.001292	-2.0691	-2.05398	-1.96007	-2.18663	-2.02846							Testing	-2.08893	0.00847348	0.110597
[Ch]Cl-Phenol (1 : 2)	313.15	5010	0.031878	0.365013	0.762537	4.21038	2.74955	2.429	2.1419	0.939945	1.24956	0.001292	-1.832	-1.7619	-1.73303	-1.94575	-1.82942							Training	-1.78278	0.0165033	-0.526062
[Ch]Cl-Phenol (1 : 2)	323.15	1710	0.031878	0.365013	0.762537	4.21038	2.74955	2.429	2.1419	0.939945	1.24956	0.001292	-2.6521	-2.74502	-2.85358	-2.85206	-3.01802							Training	-2.77674	0.00325264	0.416094
[Ch]Cl-Phenol (1 : 2)	323.15	2460	0.031878	0.365013	0.762537	4.21038	2.74955	2.429	2.1419	0.939945	1.24956	0.001292	-2.4079	-2.45592	-2.47292	-2.38218	-2.54907							Training	-2.44115	0.00462766	0.395359
[Ch]Cl-Phenol (1 : 2)	323.15	4390	0.031878	0.365013	0.762537	4.21038	2.74955	2.429	2.1419	0.939945	1.24956	0.001292	-1.998	-2.0248	-2.00296	-2.10246	-2.03101							Training	-2.05254	0.0120481	-0.174641
[Ch]Cl-Phenol (1 : 2)	323.15	5410	0.031878	0.365013	0.762537	4.21038	2.74955	2.429	2.1419	0.939945	1.24956	0.001292	-1.8689	-1.84297	-1.88344	-1.9296	-1.87166							Training	-1.86952	0.0182282	-0.682844
[Ch]Cl-Phenol (1 : 2)	333.15	2820	0.031878	0.365013	0.762537	4.21038	2.74955	2.429	2.1419	0.939945	1.24956	0.001292	-2.5627	-2.52631	-2.54783	-2.31918	-2.58759							Testing	-2.494	0.00515264	-0.0440532
[Ch]Cl-Phenol (1 : 2)	333.15	3810	0.031878	0.365013	0.762537	4.21038	2.74955	2.429	2.1419	0.939945	1.24956	0.001292	-2.2528	-2.29806	-2.30296	-2.21391	-2.29033							Testing	-2.30424	0.00867688	-0.0997307
[Ch]Cl-Phenol (1 : 2)	333.15	5610	0.031878	0.365013	0.762537	4.21038	2.74955	2.429	2.1419	0.939945	1.24956	0.001292	-1.9988	-1.95854	-2.0055	-1.94395	-1.91658							Training	-2.01109	0.0188538	-0.900017
[Ch]Cl-Phenol (1 : 2)	333.15	7620	0.031878	0.365013	0.762537	4.21038	2.74955	2.429	2.1419	0.939945	1.24956	0.001292	-1.755	-1.76651	-1.78322	-1.7883	-1.64593							Testing	-1.72931	0.0359657	-1.92467
[TEA]Br-Hexanoic acid (1 : 2)	303.15	412	0.035112	0.340164	0.37219	3.54263	7.58791	3.27915	0.803695	1.41617	1.42892	0	-3.4265	-3.49273	-3.4771	-3.42011	-3.46076							Training	-3.54956	0.00349438	0.832455
[TEA]Br-Hexanoic acid (1 : 2)	303.15	521	0.035112	0.340164	0.37219	3.54263	7.58791	3.27915	0.803695	1.41617	1.42892	0	-3.2493	-3.2481	-3.22968	-3.20434	-3.2154							Training	-3.30392	0.003434	0.469077
[TEA]Br-Hexanoic acid (1 : 2)	303.15	609	0.035112	0.340164	0.37219	3.54263	7.58791	3.27915	0.803695	1.41617	1.42892	0	-3.0769	-3.07898	-3.06211	-3.05869	-3.06097							Testing	-3.14237	0.00339826	0.20434
[TEA]Br-Hexanoic acid (1 : 2)	303.15	688	0.035112	0.340164	0.37219	3.54263	7.58791	3.27915	0.803695	1.41617	1.42892	0	-2.9394	-2.94394	-2.93056	-2.94093	-2.94335							Training	-3.01569	0.00337608	0.00315964
[TEA]Br-Hexanoic acid (1 : 2)	303.15	803	0.035112	0.340164	0.37219	3.54263	7.58791	3.27915	0.803695	1.41617	1.42892	0	-2.7504	-2.77155	-2.76542	-2.78449	-2.79497							Testing	-2.8537	0.00336054	-0.403945
[TEA]Br-Hexanoic acid (1 : 2)	303.15	913	0.035112	0.340164	0.37219	3.54263	7.58791	3.27915	0.803695	1.41617	1.42892	0	-2.6242	-2.62995	-2.63202	-2.64758	-2.66924							Testing	-2.71777	0.00336425	-0.274465
[TEA]Br-Hexanoic acid (1 : 2)	303.15	1130	0.035112	0.340164	0.37219	3.54263	7.58791	3.27915	0.803695	1.41617	1.42892	0	-2.4248	-2.40493	-2.42481	-2.40771	-2.44761							Testing	-2.48986	0.00342483	0.0180861
[TEA]Br-Hexanoic acid (1 : 2)	313.15	528	0.035112	0.340164	0.37219	3.54263	7.58791	3.27915	0.803695	1.41617	1.42892	0	-3.3843	-3.37642	-3.35721	-3.35637	-3.34694							Training	-3.3667	0.00352709	0.541623
[TEA]Br-Hexanoic acid (1 : 2)	313.15	627	0.035112	0.340164	0.37219	3.54263	7.58791	3.27915	0.803695	1.41617	1.42892	0	-3.2065	-3.18758	-3.17224	-3.18611	-3.17591							Training	-3.19345	0.00347688	0.25144
[TEA]Br-Hexanoic acid (1 : 2)	313.15	727	0.035112	0.340164	0.37219	3.54263	7.58791	3.27915	0.803695	1.41617	1.42892	0	-3.0366	-3.02125	-3.0126	-3.03173	-3.03146							Testing	-3.04361	0.0034411	-0.0992614
[TEA]Br-Hexanoic acid (1 : 2)	313.15	804	0.035112	0.340164	0.37219	3.54263	7.58791	3.27915	0.803695	1.41617	1.42892	0	-2.8914	-2.90765	-2.9052	-2.92142	-2.93276							Training	-2.94065	0.00342378	-0.273958
[TEA]Br-Hexanoic acid (1 : 2)	313.15	955	0.035112	0.340164	0.37219	3.54263	7.58791	3.27915	0.803695	1.41617	1.42892	0	-2.771	-2.71644	-2.72724	-2.7222	-2.75892							Training	-2.76213	0.00341565	-0.374438
[TEA]Br-Hexanoic acid (1 : 2)	313.15	1084	0.035112	0.340164	0.37219	3.54263	7.58791	3.27915	0.803695	1.41617	1.42892	0	-2.5783	-2.58114	-2.60362	-2.56789	-2.62352							Training	-2.62841	0.00343581	-0.0216921
[TEA]Br-Hexanoic acid (1 : 2)	313.15	1129	0.035112	0.340164	0.37219	3.54263	7.58791	3.27915	0.803695	1.41617	1.42892	0	-2.5396	-2.53907	-2.56569	-2.5173	-2.57826							Training	-2.58499	0.00344872	0.0339233
[TEA]Br-Hexanoic acid (1 : 2)	323.15	423	0.035112	0.340164	0.37219	3.54263	7.58791	3.27915	0.803695	1.41617	1.42892	0	-3.677	-3.75777	-3.73807	-3.74581	-3.72813							Training	-3.6969	0.00389273	1.04519
[TEA]Br-Hexanoic acid (1 : 2)	323.15	521	0.035112	0.340164	0.37219	3.54263	7.58791	3.27915	0.803695	1.41617	1.42892	0	-3.49	-3.53632	-3.51766	-3.53814	-3.50923							Testing	-3.48755	0.00381576	0.73262
[TEA]Br-Hexanoic acid (1 : 2)	323.15	685	0.035112	0.340164	0.37219	3.54263	7.58791	3.27915	0.803695	1.41617	1.42892	0	-3.2114	-3.23074	-3.22242	-3.24883	-3.23527							Testing	-3.21635	0.00371921	0.224402
[TEA]Br-Hexanoic acid (1 : 2)	323.15	821	0.035112	0.340164	0.37219	3.54263	7.58791	3.27915	0.803695	1.41617	1.42892	0	-3.0386	-3.02412	-3.02846	-3.03912	-3.05465							Training	-3.03413	0.00366976	-0.302033
[TEA]Br-Hexanoic acid (1 : 2)	323.15	900	0.035112	0.340164	0.37219	3.54263	7.58791	3.27915	0.803695	1.41617	1.42892	0	-2.9243	-2.92039	-2.9326	-2.92619	-2.9604							Training	-2.9399	0.00365379	-0.443575
[TEA]Br-Hexanoic acid (1 : 2)	323.15	1132	0.035112	0.340164	0.37219	3.54263	7.58791	3.27915	0.803695	1.41617	1.42892	0	-2.7121	-2.67231	-2.7075	-2.62704	-2.7092							Testing	-2.69742	0.00366103	-0.160305
[TEA]Br-Hexanoic acid (1 : 2)	323.15	1263	0.035112	0.340164	0.37219	3.54263	7.58791	3.27915	0.803695	1.41617	1.42892	0	-2.5996	-2.56185	-2.60985	-2.47838	-2.57812							Training	-2.57679	0.00370081	0.0346583
L-menthol-thymol (1 : 2)	293.15	4020.1	0.016269	0.405076	0.314622	1.28224	8.6209	6.9765	2.03233	0.531451	0.184132	0.00119	-0.9337	-0.935744	-0.990603	-0.924375	-1.0814							Testing	-1.08928	0.0128464	0.0638879
L-menthol-thymol (1 : 2)	293.15	3369.1	0.016269	0.405076	0.314622	1.28224	8.6209	6.9765	2.03233	0.531451	0.184132	0.00119	-1.0573	-1.12629	-1.11985	-1.06425	-1.20403							Testing	-1.17277	0.0103829	0.286365
L-menthol-thymol (1 : 2)	293.15	2486	0.016269	0.405076	0.314622	1.28224	8.6209	6.9765	2.03233	0.531451	0.184132	0.00119	-1.3406	-1.38411	-1.32356	-1.3019	-1.39453							Training	-1.31954	0.00805781	0.363178
L-menthol-thymol (1 : 2)	293.15	1628.1	0.016269	0.405076	0.314622	1.28224	8.6209	6.9765	2.03233	0.531451	0.184132	0.00119	-1.7193	-1.66871	-1.63519	-1.61598	-1.60197							Training	-1.668	0.00692009	0.151948
L-menthol-thymol (1 : 2)	303.15	4096.7	0.016269	0.405076	0.314622	1.28224	8.6209	6.9765	2.03233	0.531451	0.184132	0.00119	-1.0533	-1.00011	-1.07166	-1.02309	-1.09191							Testing	-1.14491	0.0136059	-0.0286671
L-menthol-thymol (1 : 2)	303.15	3424.7	0.016269	0.405076	0.314622	1.28224	8.6209	6.9765	2.03233	0.531451	0.184132	0.00119	-1.1523	-1.19689	-1.20261	-1.17015	-1.23283							Testing	-1.24398	0.0110768	0.267252
L-menthol-thymol (1 : 2)	303.15	2522.9	0.016269	0.405076	0.314622	1.28224	8.6209	6.9765	2.03233	0.531451	0.184132	0.00119	-1.4292	-1.45991	-1.40555	-1.41908	-1.46115							Training	-1.41361	0.00874795	0.373728
L-menthol-thymol (1 : 2)	303.15	1647.8	0.016269	0.405076	0.314622	1.28224	8.6209	6.9765	2.03233	0.531451	0.184132	0.00119	-1.7964	-1.74857	-1.7151	-1.75287	-1.72205							Testing	-1.78901	0.00765513	0.163486
L-menthol-thymol (1 : 2)	313.15	4154.3	0.016269	0.405076	0.314622	1.28224	8.6209	6.9765	2.03233	0.531451	0.184132	0.00119	-1.132	-1.07077	-1.15541	-1.12181	-1.10328							Testing	-1.21399	0.0144625	-0.0115602
L-menthol-thymol (1 : 2)	313.15	3470.3	0.016269	0.405076	0.314622	1.28224	8.6209	6.9765	2.03233	0.531451	0.184132	0.00119	-1.2676	-1.27112	-1.28637	-1.27456	-1.25956							Training	-1.32457	0.0119172	0.249731
L-menthol-thymol (1 : 2)	313.15	2554.1	0.016269	0.405076	0.314622	1.28224	8.6209	6.9765	2.03233	0.531451	0.184132	0.00119	-1.5055	-1.53816	-1.48794	-1.53323	-1.52131							Training	-1.50822	0.00960818	0.417905
L-menthol-thymol (1 : 2)	313.15	1666.2	0.016269	0.405076	0.314622	1.28224	8.6209	6.9765	2.03233	0.531451	0.184132	0.00119	-1.8663	-1.82975	-1.79445	-1.88427	-1.83356							Testing	-1.8981	0.00857274	0.23164
L-menthol-thymol (1 : 2)	323.15	4193.9	0.016269	0.405076	0.314622	1.28224	8.6209	6.9765	2.03233	0.531451	0.184132	0.00119	-1.177	-1.14745	-1.24145	-1.22068	-1.11692							Testing	-1.29626	0.0154223	0.0977371
L-menthol-thymol (1 : 2)	323.15	3505.9	0.016269	0.405076	0.314622	1.28224	8.6209	6.9765	2.03233	0.531451	0.184132	0.00119	-1.3409	-1.349	-1.37098	-1.37763	-1.28626							Testing	-1.41205	0.0129057	0.255726
L-menthol-thymol (1 : 2)	323.15	2590	0.016269	0.405076	0.314622	1.28224	8.6209	6.9765	2.03233	0.531451	0.184132	0.00119	-1.5664	-1.61581	-1.56799	-1.64079	-1.57407							Testing	-1.59644	0.010658	0.449109
L-menthol-thymol (1 : 2)	323.15	1681.9	0.016269	0.405076	0.314622	1.28224	8.6209	6.9765	2.03233	0.531451	0.184132	0.00119	-1.9366	-1.91282	-1.87383	-2.01072	-1.9377							Training	-1.99036	0.0096727	0.34365
[Ch]Cl-Urea (1 : 2.5)	313.15	1150	0	0.56746	1.92185	2.74192	1.43604	1.02764	0.74637	1.26074	2.0032	0.0177068	-3.0791	-3.07143	-3.076	-2.86854	-2.94242							Training	-2.93714	0.0120581	0.912975
[Ch]Cl-Urea (1 : 2.5)	313.15	2670	0	0.56746	1.92185	2.74192	1.43604	1.02764	0.74637	1.26074	2.0032	0.0177068	-2.4304	-2.41016	-2.45122	-2.23362	-2.28051							Training	-2.31888	0.0116029	1.23457
[Ch]Cl-Urea (1 : 2.5)	313.15	4530	0	0.56746	1.92185	2.74192	1.43604	1.02764	0.74637	1.26074	2.0032	0.0177068	-2.0794	-2.15778	-2.10015	-1.88451	-1.92491							Training	-2.0621	0.0157644	0.581133
[Ch]Cl-Urea (1 : 2.5)	313.15	6670	0	0.56746	1.92185	2.74192	1.43604	1.02764	0.74637	1.26074	2.0032	0.0177068	-1.8643	-1.80715	-1.76747	-1.64516	-1.94075							Training	-1.86172	0.026977	-0.616929
[Ch]Cl-Urea (1 : 2.5)	323.15	1060	0	0.56746	1.92185	2.74192	1.43604	1.02764	0.74637	1.26074	2.0032	0.0177068	-3.2442	-3.2943	-3.27033	-3.13951	-3.11936							Training	-3.16732	0.0122764	0.84385
[Ch]Cl-Urea (1 : 2.5)	323.15	2500	0	0.56746	1.92185	2.74192	1.43604	1.02764	0.74637	1.26074	2.0032	0.0177068	-2.551	-2.54484	-2.61058	-2.46267	-2.42491							Testing	-2.49733	0.0113915	1.27235
[Ch]Cl-Urea (1 : 2.5)	323.15	4120	0	0.56746	1.92185	2.74192	1.43604	1.02764	0.74637	1.26074	2.0032	0.0177068	-2.2349	-2.31866	-2.28146	-2.11275	-2.03231							Testing	-2.2148	0.0141167	0.738476
[Ch]Cl-Urea (1 : 2.5)	323.15	6200	0	0.56746	1.92185	2.74192	1.43604	1.02764	0.74637	1.26074	2.0032	0.0177068	-2.0099	-2.0022	-1.94326	-1.85787	-1.96022							Training	-1.91785	0.0233918	-0.336899
[Ch]Cl-Urea (1 : 2.5)	333.15	1080	0	0.56746	1.92185	2.74192	1.43604	1.02764	0.74637	1.26074	2.0032	0.0177068	-3.442	-3.38329	-3.37547	-3.32398	-3.23134							Training	-3.32118	0.0125103	0.609683
[Ch]Cl-Urea (1 : 2.5)	333.15	2540	0	0.56746	1.92185	2.74192	1.43604	1.02764	0.74637	1.26074	2.0032	0.0177068	-2.6882	-2.64211	-2.7174	-2.62299	-2.50415							Training	-2.67076	0.0115039	1.22763
[Ch]Cl-Urea (1 : 2.5)	333.15	4030	0	0.56746	1.92185	2.74192	1.43604	1.02764	0.74637	1.26074	2.0032	0.0177068	-2.4079	-2.43503	-2.4097	-2.28593	-2.11337							Training	-2.35174	0.0137759	0.702102
[Ch]Cl-Urea (1 : 2.5)	333.15	5980	0	0.56746	1.92185	2.74192	1.43604	1.02764	0.74637	1.26074	2.0032	0.0177068	-2.1456	-2.1469	-2.08354	-2.03253	-2.01029							Testing	-1.98603	0.0217839	-0.264195
ChCl-DEG (1 : 3)	293.15	112.8	0	0.108825	1.05878	3.95827	5.29764	1.23768	0.833087	1.5012	1.77493	0.00095	-5.5994	-5.54699	-5.55399	-5.50417	-5.50069							Testing	-5.52474	0.00450866	-0.82984
ChCl-DEG (1 : 3)	293.15	212.2	0	0.108825	1.05878	3.95827	5.29764	1.23768	0.833087	1.5012	1.77493	0.00095	-4.8796	-4.85904	-4.85311	-4.83149	-4.86254							Training	-4.90097	0.0044307	-0.744008
ChCl-DEG (1 : 3)	293.15	314.9	0	0.108825	1.05878	3.95827	5.29764	1.23768	0.833087	1.5012	1.77493	0.00095	-4.5099	-4.44888	-4.44576	-4.41471	-4.42624							Testing	-4.47192	0.00436574	-0.631034
ChCl-DEG (1 : 3)	293.15	409.8	0	0.108825	1.05878	3.95827	5.29764	1.23768	0.833087	1.5012	1.77493	0.00095	-4.2199	-4.17817	-4.17793	-4.15287	-4.14412							Training	-4.19439	0.00431979	-0.602486
ChCl-DEG (1 : 3)	293.15	512.9	0	0.108825	1.05878	3.95827	5.29764	1.23768	0.833087	1.5012	1.77493	0.00095	-3.9686	-3.93895	-3.94548	-3.93609	-3.91657							Testing	-3.96309	0.00428518	-0.769557
ChCl-DEG (1 : 3)	303.15	117.7	0	0.108825	1.05878	3.95827	5.29764	1.23768	0.833087	1.5012	1.77493	0.00095	-5.5994	-5.68095	-5.67909	-5.64152	-5.63633							Training	-5.62554	0.0040033	-0.38691
ChCl-DEG (1 : 3)	303.15	215.1	0	0.108825	1.05878	3.95827	5.29764	1.23768	0.833087	1.5012	1.77493	0.00095	-4.9762	-5.02486	-5.00715	-5.00256	-5.02582							Training	-5.02938	0.00391581	-0.55124
ChCl-DEG (1 : 3)	303.15	321.3	0	0.108825	1.05878	3.95827	5.29764	1.23768	0.833087	1.5012	1.77493	0.00095	-4.5564	-4.60808	-4.58972	-4.579	-4.58386							Training	-4.59938	0.00383665	-0.320914
ChCl-DEG (1 : 3)	303.15	415.1	0	0.108825	1.05878	3.95827	5.29764	1.23768	0.833087	1.5012	1.77493	0.00095	-4.2977	-4.34356	-4.32845	-4.3213	-4.31002							Training	-4.33542	0.00378081	-0.382493
ChCl-DEG (1 : 3)	303.15	524	0	0.108825	1.05878	3.95827	5.29764	1.23768	0.833087	1.5012	1.77493	0.00095	-4.0804	-4.09275	-4.09011	-4.09034	-4.07312							Training	-4.1019	0.00373255	-0.65034
ChCl-DEG (1 : 3)	313.15	116.9	0	0.108825	1.05878	3.95827	5.29764	1.23768	0.833087	1.5012	1.77493	0.00095	-5.8091	-5.86931	-5.85751	-5.83471	-5.817							Testing	-5.79285	0.00369037	-0.386791
ChCl-DEG (1 : 3)	313.15	219.6	0	0.108825	1.05878	3.95827	5.29764	1.23768	0.833087	1.5012	1.77493	0.00095	-5.1328	-5.18424	-5.15122	-5.1724	-5.18222							Training	-5.17434	0.0035861	-0.511822
ChCl-DEG (1 : 3)	313.15	327	0	0.108825	1.05878	3.95827	5.29764	1.23768	0.833087	1.5012	1.77493	0.00095	-4.6995	-4.77095	-4.73521	-4.75212	-4.74531							Training	-4.75379	0.00349399	-0.258189
ChCl-DEG (1 : 3)	313.15	417.7	0	0.108825	1.05878	3.95827	5.29764	1.23768	0.833087	1.5012	1.77493	0.00095	-4.4741	-4.51696	-4.48647	-4.5026	-4.48391							Testing	-4.5068	0.00342969	-0.404797
ChCl-DEG (1 : 3)	313.15	515.7	0	0.108825	1.05878	3.95827	5.29764	1.23768	0.833087	1.5012	1.77493	0.00095	-4.2545	-4.28901	-4.27441	-4.28854	-4.26814							Testing	-4.30096	0.00337409	-0.585357
ChCl-DEG (1 : 3)	323.15	122.5	0	0.108825	1.05878	3.95827	5.29764	1.23768	0.833087	1.5012	1.77493	0.00095	-5.9915	-6.00055	-5.97325	-5.98062	-5.9499							Training	-5.933	0.00355725	-0.378781
ChCl-DEG (1 : 3)	323.15	220.3	0	0.108825	1.05878	3.95827	5.29764	1.23768	0.833087	1.5012	1.77493	0.00095	-5.3817	-5.36325	-5.31284	-5.36685	-5.35829							Testing	-5.35616	0.0034467	-0.686274
ChCl-DEG (1 : 3)	323.15	321	0	0.108825	1.05878	3.95827	5.29764	1.23768	0.833087	1.5012	1.77493	0.00095	-4.9908	-4.97197	-4.91789	-4.96846	-4.94675							Training	-4.96224	0.00334787	-0.461892
ChCl-DEG (1 : 3)	323.15	421.2	0	0.108825	1.05878	3.95827	5.29764	1.23768	0.833087	1.5012	1.77493	0.00095	-4.6886	-4.6892	-4.64417	-4.68767	-4.65649							Training	-4.69179	0.00326463	-0.466556
ChCl-DEG (1 : 3)	323.15	518	0	0.108825	1.05878	3.95827	5.29764	1.23768	0.833087	1.5012	1.77493	0.00095	-4.4568	-4.46381	-4.44014	-4.47251	-4.44392							Training	-4.49373	0.00319854	-0.613271
ChCl-FA (1 : 3)	303.15	80.9	0	0.210375	0.897637	4.16775	2.79867	2.41979	1.82515	0.950738	1.27966	0.00095	-5.843	-5.86389	-5.80525	-5.91704	-5.90734							Training	-5.88914	0.00340861	-0.163333
ChCl-FA (1 : 3)	303.15	218.3	0	0.210375	0.897637	4.16775	2.79867	2.41979	1.82515	0.950738	1.27966	0.00095	-4.8796	-4.86993	-4.83856	-4.8593	-4.9191							Training	-4.91406	0.00326193	-0.204189
ChCl-FA (1 : 3)	303.15	323.7	0	0.210375	0.897637	4.16775	2.79867	2.41979	1.82515	0.950738	1.27966	0.00095	-4.4741	-4.48618	-4.45235	-4.41985	-4.46391							Training	-4.47749	0.00316861	-0.00193141
ChCl-FA (1 : 3)	303.15	425.3	0	0.210375	0.897637	4.16775	2.79867	2.41979	1.82515	0.950738	1.27966	0.00095	-4.2199	-4.2178	-4.18463	-4.13138	-4.1619							Training	-4.21692	0.00309445	-0.130135
ChCl-FA (1 : 3)	303.15	524.1	0	0.210375	0.897637	4.16775	2.79867	2.41979	1.82515	0.950738	1.27966	0.00095	-4.023	-4.00114	-3.97494	-3.9167	-3.94468							Testing	-4.04212	0.00303719	-0.402318
ChCl-FA (1 : 3)	303.15	582.8	0	0.210375	0.897637	4.16775	2.79867	2.41979	1.82515	0.950738	1.27966	0.00095	-3.9271	-3.88624	-3.86629	-3.80771	-3.83855							Testing	-3.95671	0.00301011	-0.593074
ChCl-FA (1 : 3)	313.15	80.8	0	0.210375	0.897637	4.16775	2.79867	2.41979	1.82515	0.950738	1.27966	0.00095	-6.0323	-6.02232	-5.9883	-6.08668	-6.0793							Testing	-6.017	0.00342397	-0.132589
ChCl-FA (1 : 3)	313.15	214.6	0	0.210375	0.897637	4.16775	2.79867	2.41979	1.82515	0.950738	1.27966	0.00095	-5.0672	-5.045	-5.03728	-5.05652	-5.11564							Training	-5.05995	0.00326471	-0.179211
ChCl-FA (1 : 3)	313.15	321.4	0	0.210375	0.897637	4.16775	2.79867	2.41979	1.82515	0.950738	1.27966	0.00095	-4.6565	-4.65069	-4.64036	-4.60336	-4.64951							Testing	-4.60997	0.00315688	-0.0111321
ChCl-FA (1 : 3)	313.15	426.7	0	0.210375	0.897637	4.16775	2.79867	2.41979	1.82515	0.950738	1.27966	0.00095	-4.3741	-4.37092	-4.36162	-4.29853	-4.33455							Testing	-4.33735	0.00306733	-0.097488
ChCl-FA (1 : 3)	313.15	523.2	0	0.210375	0.897637	4.16775	2.79867	2.41979	1.82515	0.950738	1.27966	0.00095	-4.1669	-4.15782	-4.15616	-4.08285	-4.12036							Testing	-4.16481	0.00299987	-0.296236
ChCl-FA (1 : 3)	313.15	581.7	0	0.210375	0.897637	4.16775	2.79867	2.41979	1.82515	0.950738	1.27966	0.00095	-4.057	-4.04203	-4.04724	-3.96999	-4.01272							Training	-4.07824	0.00296578	-0.425555
ChCl-FA (1 : 3)	323.15	81.5	0	0.210375	0.897637	4.16775	2.79867	2.41979	1.82515	0.950738	1.27966	0.00095	-6.0748	-6.17178	-6.16969	-6.25119	-6.24287							Training	-6.15338	0.00362559	0.298931
ChCl-FA (1 : 3)	323.15	222.1	0	0.210375	0.897637	4.16775	2.79867	2.41979	1.82515	0.950738	1.27966	0.00095	-5.185	-5.16919	-5.19195	-5.19884	-5.2528							Testing	-5.16166	0.00344225	-0.104148
ChCl-FA (1 : 3)	323.15	329.6	0	0.210375	0.897637	4.16775	2.79867	2.41979	1.82515	0.950738	1.27966	0.00095	-4.7795	-4.78405	-4.80378	-4.75531	-4.79824							Training	-4.72323	0.0033221	0.117599
ChCl-FA (1 : 3)	323.15	428.9	0	0.210375	0.897637	4.16775	2.79867	2.41979	1.82515	0.950738	1.27966	0.00095	-4.5099	-4.52239	-4.54377	-4.46786	-4.50543							Testing	-4.46942	0.00322652	0.00555638
ChCl-FA (1 : 3)	323.15	528.6	0	0.210375	0.897637	4.16775	2.79867	2.41979	1.82515	0.950738	1.27966	0.00095	-4.3125	-4.30182	-4.33214	-4.24075	-4.28423							Training	-4.28977	0.00314545	-0.20655
ChCl-FA (1 : 3)	323.15	585.3	0	0.210375	0.897637	4.16775	2.79867	2.41979	1.82515	0.950738	1.27966	0.00095	-4.2131	-4.18917	-4.22687	-4.12846	-4.17944							Testing	-4.20457	0.00310599	-0.406995
ChCl-FA (1 : 3)	333.15	86.3	0	0.210375	0.897637	4.16775	2.79867	2.41979	1.82515	0.950738	1.27966	0.00095	-6.32	-6.2758	-6.31472	-6.3757	-6.36814							Training	-6.26827	0.00400815	0.143859
ChCl-FA (1 : 3)	333.15	224.4	0	0.210375	0.897637	4.16775	2.79867	2.41979	1.82515	0.950738	1.27966	0.00095	-5.3602	-5.31744	-5.37772	-5.37142	-5.41749							Training	-5.30518	0.00381226	-0.0567885
ChCl-FA (1 : 3)	333.15	330.3	0	0.210375	0.897637	4.16775	2.79867	2.41979	1.82515	0.950738	1.27966	0.00095	-4.9337	-4.93999	-4.99696	-4.9355	-4.9734							Training	-4.87356	0.00368143	0.189967
ChCl-FA (1 : 3)	333.15	430.4	0	0.210375	0.897637	4.16775	2.79867	2.41979	1.82515	0.950738	1.27966	0.00095	-4.6565	-4.67572	-4.73475	-4.64213	-4.67849							Testing	-4.615	0.00357325	0.0884918
ChCl-FA (1 : 3)	333.15	530.6	0	0.210375	0.897637	4.16775	2.79867	2.41979	1.82515	0.950738	1.27966	0.00095	-4.4397	-4.453	-4.52193	-4.40892	-4.45537							Training	-4.43076	0.00348003	-0.0796737
ChCl-FA (1 : 3)	333.15	586.4	0	0.210375	0.897637	4.16775	2.79867	2.41979	1.82515	0.950738	1.27966	0.00095	-4.3505	-4.34128	-4.41813	-4.29521	-4.35128							Training	-4.34441	0.00343465	-0.269275
ChCl-LEV (1 : 3)	303.15	79.4	0	0	0.625687	5.86388	3.65454	0.91525	1.13987	2.23252	1.28615	0.00095	-5.4491	-5.47751	-5.48901	-5.45312	-5.47031							Testing	-5.44041	0.00482339	0.0675646
ChCl-LEV (1 : 3)	303.15	208.4	0	0	0.625687	5.86388	3.65454	0.91525	1.13987	2.23252	1.28615	0.00095	-4.5008	-4.4998	-4.51781	-4.52845	-4.55315							Testing	-4.50267	0.00479366	0.0216531
ChCl-LEV (1 : 3)	303.15	310.9	0	0	0.625687	5.86388	3.65454	0.91525	1.13987	2.23252	1.28615	0.00095	-4.1105	-4.09528	-4.1237	-4.10243	-4.11087							Testing	-4.03919	0.00478784	0.205114
ChCl-LEV (1 : 3)	303.15	411.9	0	0	0.625687	5.86388	3.65454	0.91525	1.13987	2.23252	1.28615	0.00095	-3.8397	-3.8104	-3.85097	-3.80023	-3.8135							Testing	-3.73653	0.00479754	0.122127
ChCl-LEV (1 : 3)	303.15	510.9	0	0	0.625687	5.86388	3.65454	0.91525	1.13987	2.23252	1.28615	0.00095	-3.6119	-3.58281	-3.63725	-3.56054	-3.60085							Training	-3.51951	0.0048219	-0.0107438
ChCl-LEV (1 : 3)	303.15	570	0	0	0.625687	5.86388	3.65454	0.91525	1.13987	2.23252	1.28615	0.00095	-3.4999	-3.46249	-3.52571	-3.43293	-3.49746							Testing	-3.41031	0.00484346	-0.202712
ChCl-LEV (1 : 3)	313.15	69.8	0	0	0.625687	5.86388	3.65454	0.91525	1.13987	2.23252	1.28615	0.00095	-5.7764	-5.79276	-5.77539	-5.72789	-5.74544							Testing	-5.71446	0.0045654	-0.0222742
ChCl-LEV (1 : 3)	313.15	202.5	0	0	0.625687	5.86388	3.65454	0.91525	1.13987	2.23252	1.28615	0.00095	-4.7105	-4.72678	-4.7173	-4.74906	-4.77469							Testing	-4.73281	0.00451737	0.121645
ChCl-LEV (1 : 3)	313.15	306.8	0	0	0.625687	5.86388	3.65454	0.91525	1.13987	2.23252	1.28615	0.00095	-4.2831	-4.30343	-4.30704	-4.30865	-4.31671							Training	-4.25863	0.00449817	0.309182
ChCl-LEV (1 : 3)	313.15	410.9	0	0	0.625687	5.86388	3.65454	0.91525	1.13987	2.23252	1.28615	0.00095	-4.0063	-4.00462	-4.02369	-3.99278	-4.00667							Testing	-3.95129	0.00449529	0.176294
ChCl-LEV (1 : 3)	313.15	508.5	0	0	0.625687	5.86388	3.65454	0.91525	1.13987	2.23252	1.28615	0.00095	-3.781	-3.77639	-3.81221	-3.75179	-3.79433							Testing	-3.74407	0.00450736	0.0117617
ChCl-LEV (1 : 3)	313.15	579.8	0	0	0.625687	5.86388	3.65454	0.91525	1.13987	2.23252	1.28615	0.00095	-3.6535	-3.62949	-3.67826	-3.59475	-3.66884							Training	-3.61902	0.00452522	-0.161651
ChCl-LEV (1 : 3)	323.15	80.8	0	0	0.625687	5.86388	3.65454	0.91525	1.13987	2.23252	1.28615	0.00095	-5.9145	-5.86464	-5.81535	-5.7998	-5.81396							Testing	-5.80915	0.00448526	-0.034759
ChCl-LEV (1 : 3)	323.15	210	0	0	0.625687	5.86388	3.65454	0.91525	1.13987	2.23252	1.28615	0.00095	-4.8929	-4.89138	-4.85396	-4.90691	-4.91487							Testing	-4.89462	0.0044248	0.0678434
ChCl-LEV (1 : 3)	323.15	314	0	0	0.625687	5.86388	3.65454	0.91525	1.13987	2.23252	1.28615	0.00095	-4.483	-4.47971	-4.45788	-4.48175	-4.4733							Training	-4.44446	0.00439434	0.226843
ChCl-LEV (1 : 3)	323.15	417.6	0	0	0.625687	5.86388	3.65454	0.91525	1.13987	2.23252	1.28615	0.00095	-4.1997	-4.18445	-4.18103	-4.17092	-4.17199							Training	-4.15433	0.00438014	0.153088
ChCl-LEV (1 : 3)	323.15	517.8	0	0	0.625687	5.86388	3.65454	0.91525	1.13987	2.23252	1.28615	0.00095	-3.9846	-3.94997	-3.96691	-3.92267	-3.9576							Training	-3.95397	0.00438173	-0.057516
ChCl-LEV (1 : 3)	323.15	579.7	0	0	0.625687	5.86388	3.65454	0.91525	1.13987	2.23252	1.28615	0.00095	-3.8728	-3.82119	-3.85137	-3.784	-3.84882							Training	-3.85162	0.00439024	-0.237464
ChCl-LEV (1 : 3)	333.15	85.9	0	0	0.625687	5.86388	3.65454	0.91525	1.13987	2.23252	1.28615	0.00095	-5.9915	-6.01502	-5.93314	-5.94091	-5.93102							Training	-5.95071	0.00459399	0.23845
ChCl-LEV (1 : 3)	333.15	219.8	0	0	0.625687	5.86388	3.65454	0.91525	1.13987	2.23252	1.28615	0.00095	-5.0207	-5.05045	-4.98407	-5.06163	-5.0361							Training	-5.03817	0.00451678	0.138931
ChCl-LEV (1 : 3)	333.15	321.6	0	0	0.625687	5.86388	3.65454	0.91525	1.13987	2.23252	1.28615	0.00095	-4.5854	-4.65932	-4.61057	-4.6603	-4.62088							Testing	-4.62125	0.00447609	0.328931
ChCl-LEV (1 : 3)	333.15	425.2	0	0	0.625687	5.86388	3.65454	0.91525	1.13987	2.23252	1.28615	0.00095	-4.32	-4.36649	-4.33902	-4.35324	-4.32778							Training	-4.34657	0.00445065	0.256085
ChCl-LEV (1 : 3)	333.15	524.9	0	0	0.625687	5.86388	3.65454	0.91525	1.13987	2.23252	1.28615	0.00095	-4.1166	-4.13283	-4.12863	-4.10525	-4.11824							Training	-4.15849	0.00444139	0.0214058
ChCl-LEV (1 : 3)	333.15	583	0	0	0.625687	5.86388	3.65454	0.91525	1.13987	2.23252	1.28615	0.00095	-4.0009	-4.01096	-4.02096	-3.97309	-4.01678							Testing	-4.06795	0.00444287	-0.15558
ChCl-Phenol (1 : 3)	293.15	104.4	0.036225	0.414787	0.626363	3.78293	2.69851	2.7256	2.34468	0.863738	0.9254	0.00095	-5.4491	-5.5468	-5.51933	-5.54717	-5.56838							Testing	-5.59816	0.00364276	-0.426833
ChCl-Phenol (1 : 3)	293.15	206.3	0.036225	0.414787	0.626363	3.78293	2.69851	2.7256	2.34468	0.863738	0.9254	0.00095	-4.756	-4.83894	-4.83038	-4.80214	-4.84598							Training	-4.87964	0.00356255	-0.512192
ChCl-Phenol (1 : 3)	293.15	307.7	0.036225	0.414787	0.626363	3.78293	2.69851	2.7256	2.34468	0.863738	0.9254	0.00095	-4.3583	-4.41823	-4.4089	-4.37334	-4.3822							Training	-4.41924	0.00349821	-0.299666
ChCl-Phenol (1 : 3)	293.15	406.2	0.036225	0.414787	0.626363	3.78293	2.69851	2.7256	2.34468	0.863738	0.9254	0.00095	-4.1105	-4.11389	-4.1059	-4.10094	-4.077							Training	-4.13376	0.00345048	-0.420752
ChCl-Phenol (1 : 3)	293.15	508.5	0.036225	0.414787	0.626363	3.78293	2.69851	2.7256	2.34468	0.863738	0.9254	0.00095	-3.8538	-3.84757	-3.84879	-3.8928	-3.8508							Testing	-3.9289	0.00341633	-0.573243
ChCl-Phenol (1 : 3)	303.15	113.1	0.036225	0.414787	0.626363	3.78293	2.69851	2.7256	2.34468	0.863738	0.9254	0.00095	-5.655	-5.61922	-5.59355	-5.6288	-5.6329							Training	-5.65478	0.00325811	-0.530634
ChCl-Phenol (1 : 3)	303.15	217.6	0.036225	0.414787	0.626363	3.78293	2.69851	2.7256	2.34468	0.863738	0.9254	0.00095	-4.9908	-4.93592	-4.92656	-4.91488	-4.92998							Training	-4.94532	0.0031649	-0.706477
ChCl-Phenol (1 : 3)	303.15	316.3	0.036225	0.414787	0.626363	3.78293	2.69851	2.7256	2.34468	0.863738	0.9254	0.00095	-4.5756	-4.54109	-4.53156	-4.5174	-4.49921							Testing	-4.51582	0.00309192	-0.460623
ChCl-Phenol (1 : 3)	303.15	418.3	0.036225	0.414787	0.626363	3.78293	2.69851	2.7256	2.34468	0.863738	0.9254	0.00095	-4.2759	-4.23122	-4.22545	-4.24238	-4.19516							Training	-4.23008	0.00303185	-0.45669
ChCl-Phenol (1 : 3)	303.15	514.2	0.036225	0.414787	0.626363	3.78293	2.69851	2.7256	2.34468	0.863738	0.9254	0.00095	-4.0342	-3.98289	-3.98837	-4.04758	-3.98833							Testing	-4.04059	0.00298963	-0.59821
ChCl-Phenol (1 : 3)	313.15	116	0.036225	0.414787	0.626363	3.78293	2.69851	2.7256	2.34468	0.863738	0.9254	0.00095	-5.7446	-5.74711	-5.72042	-5.76803	-5.74902							Training	-5.77709	0.00306512	-0.283821
ChCl-Phenol (1 : 3)	313.15	218.1	0.036225	0.414787	0.626363	3.78293	2.69851	2.7256	2.34468	0.863738	0.9254	0.00095	-5.0515	-5.08727	-5.0763	-5.08473	-5.07357							Training	-5.08894	0.00296208	-0.411601
ChCl-Phenol (1 : 3)	313.15	317.3	0.036225	0.414787	0.626363	3.78293	2.69851	2.7256	2.34468	0.863738	0.9254	0.00095	-4.6565	-4.69081	-4.68062	-4.68662	-4.64446							Training	-4.6581	0.00287694	-0.189669
ChCl-Phenol (1 : 3)	313.15	411.5	0.036225	0.414787	0.626363	3.78293	2.69851	2.7256	2.34468	0.863738	0.9254	0.00095	-4.3901	-4.40203	-4.39651	-4.4277	-4.36178							Testing	-4.39007	0.00280978	-0.267212
ChCl-Phenol (1 : 3)	313.15	506.8	0.036225	0.414787	0.626363	3.78293	2.69851	2.7256	2.34468	0.863738	0.9254	0.00095	-4.1605	-4.15127	-4.15831	-4.22676	-4.15147							Training	-4.19568	0.00275538	-0.377064
ChCl-Phenol (1 : 3)	323.15	123.4	0.036225	0.414787	0.626363	3.78293	2.69851	2.7256	2.34468	0.863738	0.9254	0.00095	-5.843	-5.83823	-5.81193	-5.871	-5.83036							Training	-5.87429	0.00305342	-0.1383
ChCl-Phenol (1 : 3)	323.15	218.1	0.036225	0.414787	0.626363	3.78293	2.69851	2.7256	2.34468	0.863738	0.9254	0.00095	-5.2214	-5.2418	-5.22914	-5.25755	-5.22025							Training	-5.24671	0.00294702	-0.362353
ChCl-Phenol (1 : 3)	323.15	318.2	0.036225	0.414787	0.626363	3.78293	2.69851	2.7256	2.34468	0.863738	0.9254	0.00095	-4.8409	-4.84172	-4.83075	-4.85647	-4.79076							Testing	-4.81282	0.00284919	-0.222339
ChCl-Phenol (1 : 3)	323.15	412.5	0.036225	0.414787	0.626363	3.78293	2.69851	2.7256	2.34468	0.863738	0.9254	0.00095	-4.5469	-4.55205	-4.54721	-4.59521	-4.50961							Training	-4.54451	0.00277078	-0.171846
ChCl-Phenol (1 : 3)	323.15	513.6	0.036225	0.414787	0.626363	3.78293	2.69851	2.7256	2.34468	0.863738	0.9254	0.00095	-4.32	-4.28559	-4.29639	-4.37937	-4.28869							Training	-4.33835	0.00270155	-0.36101
ChCl-TEG (1 : 3)	293.15	109.3	0	0	0.441337	5.54767	6.15969	1.41535	1.17325	1.49891	1.73285	0.0150875	-5.2591	-5.2286	-5.23136	-5.23153	-5.2544							Training	-5.17038	0.00624088	-0.522085
ChCl-TEG (1 : 3)	293.15	208.6	0	0	0.441337	5.54767	6.15969	1.41535	1.17325	1.49891	1.73285	0.0150875	-4.5282	-4.53294	-4.53712	-4.54585	-4.58721							Testing	-4.55907	0.00625709	-0.529702
ChCl-TEG (1 : 3)	293.15	315.9	0	0	0.441337	5.54767	6.15969	1.41535	1.17325	1.49891	1.73285	0.0150875	-4.0984	-4.10354	-4.12243	-4.11327	-4.0963							Testing	-4.12858	0.00629125	-0.288455
ChCl-TEG (1 : 3)	293.15	403.3	0	0	0.441337	5.54767	6.15969	1.41535	1.17325	1.49891	1.73285	0.0150875	-3.849	-3.85045	-3.88996	-3.87698	-3.80315							Testing	-3.88569	0.00633185	-0.325349
ChCl-TEG (1 : 3)	293.15	504	0	0	0.441337	5.54767	6.15969	1.41535	1.17325	1.49891	1.73285	0.0150875	-3.5972	-3.60776	-3.67919	-3.67006	-3.53741							Training	-3.66946	0.00639284	-0.422633
ChCl-TEG (1 : 3)	303.15	119.3	0	0	0.441337	5.54767	6.15969	1.41535	1.17325	1.49891	1.73285	0.0150875	-5.3602	-5.3195	-5.3018	-5.30446	-5.34516							Testing	-5.26055	0.005867	-0.456952
ChCl-TEG (1 : 3)	303.15	212.9	0	0	0.441337	5.54767	6.15969	1.41535	1.17325	1.49891	1.73285	0.0150875	-4.7217	-4.69593	-4.68022	-4.69039	-4.74131							Training	-4.70527	0.00587207	-0.55005
ChCl-TEG (1 : 3)	303.15	319.4	0	0	0.441337	5.54767	6.15969	1.41535	1.17325	1.49891	1.73285	0.0150875	-4.2831	-4.27612	-4.2754	-4.26736	-4.26565							Training	-4.28947	0.00589383	-0.277425
ChCl-TEG (1 : 3)	303.15	416.7	0	0	0.441337	5.54767	6.15969	1.41535	1.17325	1.49891	1.73285	0.0150875	-3.9739	-3.99837	-4.02195	-4.00671	-3.94971							Training	-4.03042	0.0059286	-0.244723
ChCl-TEG (1 : 3)	303.15	512.7	0	0	0.441337	5.54767	6.15969	1.41535	1.17325	1.49891	1.73285	0.0150875	-3.7636	-3.76936	-3.82515	-3.80872	-3.70483							Training	-3.83425	0.00597683	-0.436531
ChCl-TEG (1 : 3)	313.15	114	0	0	0.441337	5.54767	6.15969	1.41535	1.17325	1.49891	1.73285	0.0150875	-5.5728	-5.55561	-5.5177	-5.52062	-5.56464							Testing	-5.48364	0.00568026	-0.356313
ChCl-TEG (1 : 3)	313.15	220.8	0	0	0.441337	5.54767	6.15969	1.41535	1.17325	1.49891	1.73285	0.0150875	-4.8536	-4.84532	-4.80919	-4.8277	-4.88621							Testing	-4.85521	0.00567345	-0.503208
ChCl-TEG (1 : 3)	313.15	318.2	0	0	0.441337	5.54767	6.15969	1.41535	1.17325	1.49891	1.73285	0.0150875	-4.5008	-4.46711	-4.44502	-4.44606	-4.46198							Training	-4.483	0.00568217	-0.34156
ChCl-TEG (1 : 3)	313.15	414.9	0	0	0.441337	5.54767	6.15969	1.41535	1.17325	1.49891	1.73285	0.0150875	-4.1734	-4.18892	-4.19135	-4.18128	-4.15048							Training	-4.22665	0.00570492	-0.261519
ChCl-TEG (1 : 3)	313.15	510.6	0	0	0.441337	5.54767	6.15969	1.41535	1.17325	1.49891	1.73285	0.0150875	-3.9425	-3.95827	-3.99369	-3.97712	-3.9082							Training	-4.03302	0.00574125	-0.402467
ChCl-TEG (1 : 3)	323.15	119.2	0	0	0.441337	5.54767	6.15969	1.41535	1.17325	1.49891	1.73285	0.0150875	-5.684	-5.69866	-5.63879	-5.65744	-5.71195							Training	-5.64528	0.00567942	-0.172193
ChCl-TEG (1 : 3)	323.15	216.7	0	0	0.441337	5.54767	6.15969	1.41535	1.17325	1.49891	1.73285	0.0150875	-5.036	-5.05601	-4.99741	-5.03402	-5.10344							Training	-5.07315	0.0056616	-0.383906
ChCl-TEG (1 : 3)	323.15	318.8	0	0	0.441337	5.54767	6.15969	1.41535	1.17325	1.49891	1.73285	0.0150875	-4.6565	-4.65555	-4.61141	-4.62919	-4.66209							Testing	-4.67935	0.00565824	-0.302611
ChCl-TEG (1 : 3)	323.15	418.6	0	0	0.441337	5.54767	6.15969	1.41535	1.17325	1.49891	1.73285	0.0150875	-4.3428	-4.36849	-4.35041	-4.35304	-4.34701							Training	-4.41621	0.00567007	-0.246623
ChCl-TEG (1 : 3)	323.15	516	0	0	0.441337	5.54767	6.15969	1.41535	1.17325	1.49891	1.73285	0.0150875	-4.1166	-4.13359	-4.15047	-4.14118	-4.10639							Testing	-4.22133	0.00569604	-0.43875
MTPPBr-LEV (1 : 3)	298.15	301	0	0	0.445937	6.45419	4.75397	3.47555	1.07241	2.10997	1.31256	0.00055	-5.469	-5.55423	-5.57242	-5.28161	-5.19973							Training	-5.3527	0.0163628	-3.44666
MTPPBr-LEV (1 : 3)	298.15	698	0	0	0.445937	6.45419	4.75397	3.47555	1.07241	2.10997	1.31256	0.00055	-4.3787	-4.23916	-4.21174	-4.28072	-4.12114							Testing	-4.20736	0.0163864	-3.68119
MTPPBr-LEV (1 : 3)	298.15	994	0	0	0.445937	6.45419	4.75397	3.47555	1.07241	2.10997	1.31256	0.00055	-3.5894	-3.55879	-3.54219	-3.66636	-3.63147							Testing	-3.614	0.016558	-2.58069
MTPPBr-LEV (1 : 3)	298.15	1209	0	0	0.445937	6.45419	4.75397	3.47555	1.07241	2.10997	1.31256	0.00055	-3.0839	-3.17248	-3.16601	-3.25703	-3.31226							Testing	-3.23324	0.0167651	-1.57703
MTPPBr-LEV (1 : 3)	298.15	1526	0	0	0.445937	6.45419	4.75397	3.47555	1.07241	2.10997	1.31256	0.00055	-2.7195	-2.72039	-2.7265	-2.72448	-2.86567							Training	-2.76115	0.017197	-0.96316
MTPPBr-LEV (1 : 3)	298.15	1759	0	0	0.445937	6.45419	4.75397	3.47555	1.07241	2.10997	1.31256	0.00055	-2.3898	-2.4511	-2.46514	-2.39343	-2.55166							Training	-2.47495	0.0176106	-0.36943
MTPPBr-LEV (1 : 3)	298.15	2068	0	0	0.445937	6.45419	4.75397	3.47555	1.07241	2.10997	1.31256	0.00055	-2.2235	-2.14995	-2.17326	-2.03368	-2.15411							Training	-2.15482	0.0182848	-0.222655
TEACl-AC (1 : 3)	298.15	397	0.0486	0.384113	0.331412	3.45149	3.71085	1.11684	0.8207	1.397	1.04781	0.0688625	-4.5303	-4.32706	-4.26573	-4.03203	-4.04541							Testing	-3.85929	0.00664229	-1.39011
TEACl-AC (1 : 3)	298.15	654	0.0486	0.384113	0.331412	3.45149	3.71085	1.11684	0.8207	1.397	1.04781	0.0688625	-3.6301	-3.73239	-3.6942	-3.54148	-3.52939							Testing	-3.41753	0.00652512	-1.11186
TEACl-AC (1 : 3)	298.15	957	0.0486	0.384113	0.331412	3.45149	3.71085	1.11684	0.8207	1.397	1.04781	0.0688625	-3.1721	-3.24077	-3.23873	-3.15801	-3.17593							Training	-3.09549	0.00651431	-1.35475
TEACl-AC (1 : 3)	298.15	1230	0.0486	0.384113	0.331412	3.45149	3.71085	1.11684	0.8207	1.397	1.04781	0.0688625	-2.8226	-2.91457	-2.94513	-2.88761	-2.92849							Training	-2.87909	0.0066226	-0.7461
TEACl-AC (1 : 3)	298.15	1634	0.0486	0.384113	0.331412	3.45149	3.71085	1.11684	0.8207	1.397	1.04781	0.0688625	-2.5477	-2.55053	-2.61611	-2.5773	-2.6147							Training	-2.61549	0.00698814	-0.418312
TEACl-AC (1 : 3)	298.15	2016	0.0486	0.384113	0.331412	3.45149	3.71085	1.11684	0.8207	1.397	1.04781	0.0688625	-2.3421	-2.27687	-2.27771	-2.35801	-2.36084							Training	-2.38527	0.00755911	-0.236833
TEACl-OCT (1 : 3)	298.15	353	0.03735	0.386925	0.333813	2.95709	9.21285	4.95864	0.900613	1.35793	1.02396	0.0688625	-3.7746	-3.66186	-3.61229	-3.74389	-3.42066							Testing	-3.47321	0.00381181	-0.366414
TEACl-OCT (1 : 3)	298.15	624	0.03735	0.386925	0.333813	2.95709	9.21285	4.95864	0.900613	1.35793	1.02396	0.0688625	-3.0227	-3.04875	-3.01658	-3.06274	-2.81906							Testing	-2.90113	0.00365285	-0.530441
TEACl-OCT (1 : 3)	298.15	940	0.03735	0.386925	0.333813	2.95709	9.21285	4.95864	0.900613	1.35793	1.02396	0.0688625	-2.4967	-2.57855	-2.56609	-2.55723	-2.43112							Training	-2.48832	0.00360672	-0.627183
TEACl-OCT (1 : 3)	298.15	1277	0.03735	0.386925	0.333813	2.95709	9.21285	4.95864	0.900613	1.35793	1.02396	0.0688625	-2.1821	-2.23274	-2.23873	-2.18859	-2.11584							Testing	-2.17726	0.00372268	-0.185039
TEACl-OCT (1 : 3)	298.15	1619	0.03735	0.386925	0.333813	2.95709	9.21285	4.95864	0.900613	1.35793	1.02396	0.0688625	-1.9553	-1.97218	-2.0033	-1.93091	-1.83686							Training	-1.94433	0.00401465	0.111409
TEACl-OCT (1 : 3)	298.15	2018	0.03735	0.386925	0.333813	2.95709	9.21285	4.95864	0.900613	1.35793	1.02396	0.0688625	-1.7595	-1.72224	-1.80002	-1.72783	-1.54828							Training	-1.72816	0.00457719	0.25616
[MTPP]Br-EG (1 : 3)	298.15	192	0	0.29385	0.825738	3.96385	3.96201	3.40753	0.663138	1.01636	1.67477	0.00055	-5.1033	-5.24472	-5.18706	-5.24088	-5.64232							Testing	-5.83762	0.0134303	-0.623006
[MTPP]Br-EG (1 : 3)	298.15	437	0	0.29385	0.825738	3.96385	3.96201	3.40753	0.663138	1.01636	1.67477	0.00055	-4.4162	-4.44292	-4.43639	-4.41652	-4.62201							Training	-4.812	0.0129787	-0.84796
[MTPP]Br-EG (1 : 3)	298.15	710	0	0.29385	0.825738	3.96385	3.96201	3.40753	0.663138	1.01636	1.67477	0.00055	-4.0024	-3.95342	-3.97654	-3.99995	-4.1383							Testing	-4.24487	0.0125815	-1.82907
[MTPP]Br-EG (1 : 3)	298.15	1134	0	0.29385	0.825738	3.96385	3.96201	3.40753	0.663138	1.01636	1.67477	0.00055	-3.6722	-3.51721	-3.56227	-3.59098	-3.71043							Training	-3.64855	0.0121865	-2.0521
[MTPP]Br-EG (1 : 3)	298.15	1528	0	0.29385	0.825738	3.96385	3.96201	3.40753	0.663138	1.01636	1.67477	0.00055	-3.4393	-3.33365	-3.34545	-3.31094	-3.40044							Training	-3.2925	0.0120613	-1.81564
[MTPP]Br-EG (1 : 3)	298.15	2018	0	0.29385	0.825738	3.96385	3.96201	3.40753	0.663138	1.01636	1.67477	0.00055	-3.087	-3.24407	-3.17652	-3.05253	-3.06575							Training	-3.01734	0.0122308	-1.37343
[Ch]Cl-1,4-butanediol (1 : 3)	293.15	110.9	0.00495	0.283275	0.7008	2.89234	5.50644	1.59681	0.748525	0.927225	1.62324	0.05855	-5.684	-5.68351	-5.6858	-5.7417	-5.65457							Training	-5.67049	0.0051936	-0.995527
[Ch]Cl-1,4-butanediol (1 : 3)	293.15	212.5	0.00495	0.283275	0.7008	2.89234	5.50644	1.59681	0.748525	0.927225	1.62324	0.05855	-4.9762	-4.99853	-4.9787	-5.00056	-5.00297							Training	-5.03253	0.00514687	-0.987223
[Ch]Cl-1,4-butanediol (1 : 3)	293.15	312.5	0.00495	0.283275	0.7008	2.89234	5.50644	1.59681	0.748525	0.927225	1.62324	0.05855	-4.6052	-4.59704	-4.57986	-4.57423	-4.57978							Training	-4.60694	0.005116	-0.827779
[Ch]Cl-1,4-butanediol (1 : 3)	293.15	412	0.00495	0.283275	0.7008	2.89234	5.50644	1.59681	0.748525	0.927225	1.62324	0.05855	-4.3351	-4.30473	-4.30184	-4.29444	-4.28707							Training	-4.303	0.00510019	-0.903316
[Ch]Cl-1,4-butanediol (1 : 3)	293.15	509.7	0.00495	0.283275	0.7008	2.89234	5.50644	1.59681	0.748525	0.927225	1.62324	0.05855	-4.1105	-4.06764	-4.08585	-4.09016	-4.07491							Training	-4.06775	0.00509912	-1.07351
[Ch]Cl-1,4-butanediol (1 : 3)	303.15	113.1	0.00495	0.283275	0.7008	2.89234	5.50644	1.59681	0.748525	0.927225	1.62324	0.05855	-5.7764	-5.82546	-5.82734	-5.8824	-5.81152							Training	-5.82596	0.00474727	-0.742814
[Ch]Cl-1,4-butanediol (1 : 3)	303.15	217.4	0.00495	0.283275	0.7008	2.89234	5.50644	1.59681	0.748525	0.927225	1.62324	0.05855	-5.116	-5.13684	-5.11747	-5.14496	-5.1568							Testing	-5.1775	0.00468735	-0.929004
[Ch]Cl-1,4-butanediol (1 : 3)	303.15	307.6	0.00495	0.283275	0.7008	2.89234	5.50644	1.59681	0.748525	0.927225	1.62324	0.05855	-4.7444	-4.77512	-4.75868	-4.76236	-4.77689							Testing	-4.7918	0.0046487	-0.702339
[Ch]Cl-1,4-butanediol (1 : 3)	303.15	406.3	0.00495	0.283275	0.7008	2.89234	5.50644	1.59681	0.748525	0.927225	1.62324	0.05855	-4.4482	-4.48032	-4.47852	-4.47722	-4.48097							Training	-4.48287	0.0046204	-0.687834
[Ch]Cl-1,4-butanediol (1 : 3)	303.15	497.5	0.00495	0.283275	0.7008	2.89234	5.50644	1.59681	0.748525	0.927225	1.62324	0.05855	-4.2545	-4.25452	-4.27313	-4.27876	-4.27673							Training	-4.25699	0.00460725	-0.884439
[Ch]Cl-1,4-butanediol (1 : 3)	313.15	121.4	0.00495	0.283275	0.7008	2.89234	5.50644	1.59681	0.748525	0.927225	1.62324	0.05855	-5.8781	-5.91373	-5.9167	-5.97349	-5.92474							Testing	-5.92633	0.00448311	-0.644931
[Ch]Cl-1,4-butanediol (1 : 3)	313.15	233.1	0.00495	0.283275	0.7008	2.89234	5.50644	1.59681	0.748525	0.927225	1.62324	0.05855	-5.2591	-5.22543	-5.21028	-5.24129	-5.26185							Testing	-5.25977	0.00440756	-0.937877
[Ch]Cl-1,4-butanediol (1 : 3)	313.15	321.6	0.00495	0.283275	0.7008	2.89234	5.50644	1.59681	0.748525	0.927225	1.62324	0.05855	-4.9199	-4.88968	-4.87987	-4.89086	-4.91076							Training	-4.89886	0.00436101	-0.753206
[Ch]Cl-1,4-butanediol (1 : 3)	313.15	410.2	0.00495	0.283275	0.7008	2.89234	5.50644	1.59681	0.748525	0.927225	1.62324	0.05855	-4.6356	-4.62994	-4.63491	-4.64084	-4.65295							Testing	-4.62664	0.00432617	-0.738792
[Ch]Cl-1,4-butanediol (1 : 3)	313.15	502.8	0.00495	0.283275	0.7008	2.89234	5.50644	1.59681	0.748525	0.927225	1.62324	0.05855	-4.4145	-4.40099	-4.42813	-4.43779	-4.44691							Testing	-4.39734	0.00430236	-0.877876
[Ch]Cl-1,4-butanediol (1 : 3)	323.15	122.8	0.00495	0.283275	0.7008	2.89234	5.50644	1.59681	0.748525	0.927225	1.62324	0.05855	-5.9915	-6.06277	-6.07343	-6.13357	-6.09285							Training	-6.06701	0.00441044	-0.403824
[Ch]Cl-1,4-butanediol (1 : 3)	323.15	218.3	0.00495	0.283275	0.7008	2.89234	5.50644	1.59681	0.748525	0.927225	1.62324	0.05855	-5.4727	-5.45529	-5.44881	-5.49444	-5.51562							Testing	-5.48088	0.00433345	-0.89555
[Ch]Cl-1,4-butanediol (1 : 3)	323.15	325.2	0.00495	0.283275	0.7008	2.89234	5.50644	1.59681	0.748525	0.927225	1.62324	0.05855	-5.0515	-5.03849	-5.03795	-5.05898	-5.0828							Testing	-5.0322	0.0042635	-0.671424
[Ch]Cl-1,4-butanediol (1 : 3)	323.15	425.9	0.00495	0.283275	0.7008	2.89234	5.50644	1.59681	0.748525	0.927225	1.62324	0.05855	-4.7677	-4.748	-4.76615	-4.78007	-4.79797							Training	-4.72841	0.0042133	-0.699974
[Ch]Cl-1,4-butanediol (1 : 3)	323.15	525.9	0.00495	0.283275	0.7008	2.89234	5.50644	1.59681	0.748525	0.927225	1.62324	0.05855	-4.5756	-4.50643	-4.551	-4.56564	-4.585							Training	-4.48834	0.00417852	-0.963524
[Ch]Cl-2,3-butanediol (1 : 3)	293.15	114.3	0	0.191175	0.932737	3.1104	4.7624	2.0866	0.720738	1.12009	1.58296	0.0068	-5.7764	-5.73399	-5.71513	-5.65299	-5.55964							Training	-5.71645	0.00495323	-1.17857
[Ch]Cl-2,3-butanediol (1 : 3)	293.15	214	0	0.191175	0.932737	3.1104	4.7624	2.0866	0.720738	1.12009	1.58296	0.0068	-5.0995	-5.08203	-5.06545	-4.9987	-4.92365							Testing	-5.07148	0.00484356	-1.20557
[Ch]Cl-2,3-butanediol (1 : 3)	293.15	316.6	0	0.191175	0.932737	3.1104	4.7624	2.0866	0.720738	1.12009	1.58296	0.0068	-4.6995	-4.67432	-4.66268	-4.59276	-4.50056							Training	-4.63011	0.00474628	-0.983703
[Ch]Cl-2,3-butanediol (1 : 3)	293.15	407.9	0	0.191175	0.932737	3.1104	4.7624	2.0866	0.720738	1.12009	1.58296	0.0068	-4.4145	-4.40443	-4.39992	-4.34415	-4.24385							Testing	-4.35572	0.004673	-0.982143
[Ch]Cl-2,3-butanediol (1 : 3)	293.15	511.3	0	0.191175	0.932737	3.1104	4.7624	2.0866	0.720738	1.12009	1.58296	0.0068	-4.1865	-4.15048	-4.15748	-4.12784	-4.0359							Training	-4.11914	0.00460512	-1.16823
[Ch]Cl-2,3-butanediol (1 : 3)	303.15	114	0	0.191175	0.932737	3.1104	4.7624	2.0866	0.720738	1.12009	1.58296	0.0068	-5.8781	-5.84523	-5.83145	-5.80152	-5.74043							Training	-5.81733	0.00478337	-0.903135
[Ch]Cl-2,3-butanediol (1 : 3)	303.15	214.6	0	0.191175	0.932737	3.1104	4.7624	2.0866	0.720738	1.12009	1.58296	0.0068	-5.1499	-5.187	-5.17571	-5.14842	-5.10652							Testing	-5.16793	0.00466068	-0.893307
[Ch]Cl-2,3-butanediol (1 : 3)	303.15	315.2	0	0.191175	0.932737	3.1104	4.7624	2.0866	0.720738	1.12009	1.58296	0.0068	-4.8036	-4.78548	-4.77956	-4.74996	-4.69575							Testing	-4.73526	0.00455318	-0.79847
[Ch]Cl-2,3-butanediol (1 : 3)	303.15	412.3	0	0.191175	0.932737	3.1104	4.7624	2.0866	0.720738	1.12009	1.58296	0.0068	-4.4918	-4.4975	-4.5001	-4.48362	-4.42677							Testing	-4.44506	0.00446383	-0.758975
[Ch]Cl-2,3-butanediol (1 : 3)	303.15	513.4	0	0.191175	0.932737	3.1104	4.7624	2.0866	0.720738	1.12009	1.58296	0.0068	-4.2759	-4.24847	-4.26359	-4.26914	-4.22739							Testing	-4.21615	0.00438583	-0.969925
[Ch]Cl-2,3-butanediol (1 : 3)	313.15	119.3	0	0.191175	0.932737	3.1104	4.7624	2.0866	0.720738	1.12009	1.58296	0.0068	-5.843	-5.90936	-5.90169	-5.90726	-5.89123							Training	-5.8982	0.00479305	-0.404404
[Ch]Cl-2,3-butanediol (1 : 3)	313.15	222.4	0	0.191175	0.932737	3.1104	4.7624	2.0866	0.720738	1.12009	1.58296	0.0068	-5.2214	-5.25915	-5.25448	-5.267	-5.26767							Testing	-5.24984	0.00465596	-0.68062
[Ch]Cl-2,3-butanediol (1 : 3)	313.15	325.5	0	0.191175	0.932737	3.1104	4.7624	2.0866	0.720738	1.12009	1.58296	0.0068	-4.8409	-4.85969	-4.86138	-4.87348	-4.86651							Training	-4.82181	0.00453483	-0.497941
[Ch]Cl-2,3-butanediol (1 : 3)	313.15	424.9	0	0.191175	0.932737	3.1104	4.7624	2.0866	0.720738	1.12009	1.58296	0.0068	-4.5854	-4.57051	-4.58227	-4.60679	-4.60502							Training	-4.53516	0.00443316	-0.607281
[Ch]Cl-2,3-butanediol (1 : 3)	313.15	528.8	0	0.191175	0.932737	3.1104	4.7624	2.0866	0.720738	1.12009	1.58296	0.0068	-4.3662	-4.31786	-4.34414	-4.38772	-4.4103							Training	-4.30714	0.00434274	-0.834748
[Ch]Cl-2,3-butanediol (1 : 3)	323.15	124	0	0.191175	0.932737	3.1104	4.7624	2.0866	0.720738	1.12009	1.58296	0.0068	-5.9522	-5.98171	-5.98134	-6.02395	-6.06113							Training	-6.00703	0.00498976	-0.236128
[Ch]Cl-2,3-butanediol (1 : 3)	323.15	217	0	0.191175	0.932737	3.1104	4.7624	2.0866	0.720738	1.12009	1.58296	0.0068	-5.3602	-5.39614	-5.39863	-5.45271	-5.50558							Testing	-5.42148	0.00485491	-0.525884
[Ch]Cl-2,3-butanediol (1 : 3)	323.15	322	0	0.191175	0.932737	3.1104	4.7624	2.0866	0.720738	1.12009	1.58296	0.0068	-4.9477	-4.98102	-4.99036	-5.04417	-5.09384							Training	-4.9768	0.00471827	-0.283354
[Ch]Cl-2,3-butanediol (1 : 3)	323.15	421.5	0	0.191175	0.932737	3.1104	4.7624	2.0866	0.720738	1.12009	1.58296	0.0068	-4.6886	-4.68763	-4.7078	-4.77128	-4.83096							Testing	-4.68572	0.00460405	-0.413275
[Ch]Cl-2,3-butanediol (1 : 3)	323.15	514.1	0	0.191175	0.932737	3.1104	4.7624	2.0866	0.720738	1.12009	1.58296	0.0068	-4.4568	-4.45769	-4.49161	-4.56841	-4.65353							Training	-4.47779	0.00451111	-0.501469
[Ch]Cl-1,2-propanediol (1 : 3)	293.15	108.5	0.00015	0.2736	0.974775	3.12064	3.88903	1.50467	0.790975	1.13591	1.59207	0.002975	-5.7138	-5.72575	-5.74013	-5.69834	-5.77886							Testing	-5.77466	0.00281192	-0.754389
[Ch]Cl-1,2-propanediol (1 : 3)	293.15	204.7	0.00015	0.2736	0.974775	3.12064	3.88903	1.50467	0.790975	1.13591	1.59207	0.002975	-5.0672	-5.04478	-5.07249	-5.00838	-5.10491							Testing	-5.12841	0.00268626	-0.859322
[Ch]Cl-1,2-propanediol (1 : 3)	293.15	312.2	0.00015	0.2736	0.974775	3.12064	3.88903	1.50467	0.790975	1.13591	1.59207	0.002975	-4.6254	-4.60392	-4.64227	-4.56025	-4.61517							Training	-4.64403	0.00256228	-0.566863
[Ch]Cl-1,2-propanediol (1 : 3)	293.15	408.8	0.00015	0.2736	0.974775	3.12064	3.88903	1.50467	0.790975	1.13591	1.59207	0.002975	-4.3351	-4.32335	-4.37164	-4.29953	-4.31713							Training	-4.34179	0.00246567	-0.573823
[Ch]Cl-1,2-propanediol (1 : 3)	293.15	514.5	0.00015	0.2736	0.974775	3.12064	3.88903	1.50467	0.790975	1.13591	1.59207	0.002975	-4.1044	-4.07436	-4.13587	-4.09054	-4.08207							Training	-4.08852	0.002376	-0.787019
[Ch]Cl-1,2-propanediol (1 : 3)	303.15	117.5	0.00015	0.2736	0.974775	3.12064	3.88903	1.50467	0.790975	1.13591	1.59207	0.002975	-5.8781	-5.85212	-5.85366	-5.83942	-5.87034							Training	-5.90244	0.00274072	-0.771753
[Ch]Cl-1,2-propanediol (1 : 3)	303.15	222.1	0.00015	0.2736	0.974775	3.12064	3.88903	1.50467	0.790975	1.13591	1.59207	0.002975	-5.116	-5.16803	-5.18368	-5.14869	-5.18273							Testing	-5.23858	0.00259363	-0.661568
[Ch]Cl-1,2-propanediol (1 : 3)	303.15	317	0.00015	0.2736	0.974775	3.12064	3.88903	1.50467	0.790975	1.13591	1.59207	0.002975	-4.7795	-4.79664	-4.82212	-4.77394	-4.77173							Training	-4.83353	0.00247439	-0.523686
[Ch]Cl-1,2-propanediol (1 : 3)	303.15	422	0.00015	0.2736	0.974775	3.12064	3.88903	1.50467	0.790975	1.13591	1.59207	0.002975	-4.483	-4.49622	-4.53383	-4.49458	-4.4573							Testing	-4.51761	0.00235821	-0.600898
[Ch]Cl-1,2-propanediol (1 : 3)	303.15	517	0.00015	0.2736	0.974775	3.12064	3.88903	1.50467	0.790975	1.13591	1.59207	0.002975	-4.2687	-4.27356	-4.32449	-4.30498	-4.2499							Training	-4.2978	0.00226736	-0.751451
[Ch]Cl-1,2-propanediol (1 : 3)	313.15	125.4	0.00015	0.2736	0.974775	3.12064	3.88903	1.50467	0.790975	1.13591	1.59207	0.002975	-6.0323	-5.99452	-5.97814	-5.99329	-5.97756							Testing	-6.05103	0.00285661	-0.787984
[Ch]Cl-1,2-propanediol (1 : 3)	313.15	217.8	0.00015	0.2736	0.974775	3.12064	3.88903	1.50467	0.790975	1.13591	1.59207	0.002975	-5.4262	-5.39996	-5.39619	-5.39716	-5.38064							Testing	-5.47337	0.00271585	-0.917047
[Ch]Cl-1,2-propanediol (1 : 3)	313.15	317.6	0.00015	0.2736	0.974775	3.12064	3.88903	1.50467	0.790975	1.13591	1.59207	0.002975	-5.0056	-5.00461	-5.01185	-4.99867	-4.94681							Training	-5.04793	0.00257821	-0.620602
[Ch]Cl-1,2-propanediol (1 : 3)	313.15	420.5	0.00015	0.2736	0.974775	3.12064	3.88903	1.50467	0.790975	1.13591	1.59207	0.002975	-4.6777	-4.70814	-4.72832	-4.72062	-4.63838							Training	-4.74188	0.00245195	-0.583879
[Ch]Cl-1,2-propanediol (1 : 3)	313.15	515.4	0.00015	0.2736	0.974775	3.12064	3.88903	1.50467	0.790975	1.13591	1.59207	0.002975	-4.4654	-4.48317	-4.51789	-4.52532	-4.42935							Training	-4.52521	0.0023496	-0.763062
[Ch]Cl-1,2-propanediol (1 : 3)	323.15	123	0.00015	0.2736	0.974775	3.12064	3.88903	1.50467	0.790975	1.13591	1.59207	0.002975	-6.2659	-6.22838	-6.18744	-6.23154	-6.17014							Testing	-6.28437	0.00317564	-0.786874
[Ch]Cl-1,2-propanediol (1 : 3)	323.15	236	0.00015	0.2736	0.974775	3.12064	3.88903	1.50467	0.790975	1.13591	1.59207	0.002975	-5.5468	-5.52753	-5.50192	-5.53452	-5.46722							Training	-5.60237	0.0029913	-0.87255
[Ch]Cl-1,2-propanediol (1 : 3)	323.15	334.3	0.00015	0.2736	0.974775	3.12064	3.88903	1.50467	0.790975	1.13591	1.59207	0.002975	-5.1328	-5.16232	-5.14821	-5.16982	-5.06983							Testing	-5.21393	0.00284652	-0.623404
[Ch]Cl-1,2-propanediol (1 : 3)	323.15	426.3	0.00015	0.2736	0.974775	3.12064	3.88903	1.50467	0.790975	1.13591	1.59207	0.002975	-4.8536	-4.90286	-4.90159	-4.9269	-4.80495							Training	-4.95296	0.00272417	-0.599424
[Ch]Cl-1,2-propanediol (1 : 3)	323.15	524.7	0.00015	0.2736	0.974775	3.12064	3.88903	1.50467	0.790975	1.13591	1.59207	0.002975	-4.667	-4.67034	-4.68563	-4.72258	-4.59192							Training	-4.73509	0.00260736	-0.864495
[Ch]Cl-DEG (1 : 3)	303.15	564.2	0	0.108825	1.05878	3.95827	5.29764	1.23768	0.833087	1.5012	1.77493	0.00095	-4.0118	-4.0102	-4.01514	-4.0162	-4.00013							Training	-4.02766	0.00371923	-0.776679
[Ch]Cl-DEG (1 : 3)	303.15	678.3	0	0.108825	1.05878	3.95827	5.29764	1.23768	0.833087	1.5012	1.77493	0.00095	-3.8304	-3.79899	-3.83236	-3.82634	-3.82045							Training	-3.83944	0.00369465	-1.16673
[Ch]Cl-DEG (1 : 3)	303.15	735.6	0	0.108825	1.05878	3.95827	5.29764	1.23768	0.833087	1.5012	1.77493	0.00095	-3.7465	-3.70448	-3.75434	-3.73954	-3.74111							Testing	-3.75469	0.00368967	-1.38848
[Ch]Cl-DEG (1 : 3)	303.15	865.3	0	0.108825	1.05878	3.95827	5.29764	1.23768	0.833087	1.5012	1.77493	0.00095	-3.5899	-3.51617	-3.60328	-3.55837	-3.57838							Testing	-3.58259	0.00369661	-1.64711
[Ch]Cl-DEG (1 : 3)	303.15	934.2	0	0.108825	1.05878	3.95827	5.29764	1.23768	0.833087	1.5012	1.77493	0.00095	-3.4052	-3.42939	-3.53445	-3.4693	-3.49848							Training	-3.50153	0.00371057	-1.26167
[Ch]Cl-DEG (1 : 3)	303.15	1112	0	0.108825	1.05878	3.95827	5.29764	1.23768	0.833087	1.5012	1.77493	0.00095	-3.3467	-3.24209	-3.38389	-3.25852	-3.30529							Training	-3.3236	0.00377951	-1.26515
[TBA]Br-EG (1 : 3)	303.15	502.5	0	0.29385	0.695925	3.06076	6.42836	2.82032	0.5945	0.998175	1.67554	0.0019875	-4.0923	-3.99702	-4.06585	-3.89699	-3.93218							Training	-4.10408	0.00397657	-0.743102
[TBA]Br-EG (1 : 3)	303.15	744.4	0	0.29385	0.695925	3.06076	6.42836	2.82032	0.5945	0.998175	1.67554	0.0019875	-3.5099	-3.5452	-3.59055	-3.54532	-3.58677							Training	-3.64011	0.00377251	-1.10231
[TBA]Br-EG (1 : 3)	303.15	805.8	0	0.29385	0.695925	3.06076	6.42836	2.82032	0.5945	0.998175	1.67554	0.0019875	-3.4296	-3.45252	-3.49272	-3.47477	-3.52095							Training	-3.54193	0.00373469	-1.35315
[TBA]Br-EG (1 : 3)	303.15	895.2	0	0.29385	0.695925	3.06076	6.42836	2.82032	0.5945	0.998175	1.67554	0.0019875	-3.3187	-3.33106	-3.36321	-3.38174	-3.43374							Testing	-3.4092	0.00368974	-1.31306
[TBA]Br-EG (1 : 3)	303.15	1085.6	0	0.29385	0.695925	3.06076	6.42836	2.82032	0.5945	0.998175	1.67554	0.0019875	-3.1419	-3.11882	-3.13037	-3.21761	-3.27075							Training	-3.16071	0.003634	-1.03651
[TBA]Br-EG (1 : 3)	303.15	1249.1	0	0.29385	0.695925	3.06076	6.42836	2.82032	0.5945	0.998175	1.67554	0.0019875	-2.9584	-2.97755	-2.96785	-3.11029	-3.14701							Testing	-2.97788	0.00362956	-0.754577
[TBA]Br-DEG (1 : 3)	303.15	688.5	0	0.108825	0.749212	3.6455	8.86342	3.21077	0.696987	1.36046	1.8021	0.0019875	-3.2597	-3.17538	-3.16428	-3.07678	-3.20797							Testing	-3.04317	0.00459453	-0.656455
[TBA]Br-DEG (1 : 3)	303.15	896.3	0	0.108825	0.749212	3.6455	8.86342	3.21077	0.696987	1.36046	1.8021	0.0019875	-2.8319	-2.8379	-2.83389	-2.77716	-2.92495							Training	-2.7223	0.0046639	-0.527603
[TBA]Br-DEG (1 : 3)	303.15	1094.6	0	0.108825	0.749212	3.6455	8.86342	3.21077	0.696987	1.36046	1.8021	0.0019875	-2.5731	-2.58931	-2.53151	-2.53603	-2.68843							Training	-2.46948	0.00479054	-0.0738366
[TBA]Br-DEG (1 : 3)	303.15	1205	0	0.108825	0.749212	3.6455	8.86342	3.21077	0.696987	1.36046	1.8021	0.0019875	-2.4316	-2.47557	-2.37828	-2.41804	-2.56471							Testing	-2.34738	0.00488663	0.133367
[TBA]Br-methyldiethanol amine (1 : 3)	303.15	423.2	0	0.0041625	0.477488	3.60564	10.1803	3.52034	0.63095	1.047	1.87279	0.0043125	-2.4522	-2.50538	-2.50543	-2.46408	-2.4054							Testing	-2.58236	0.00856626	2.81968
[TBA]Br-methyldiethanol amine (1 : 3)	303.15	512.5	0	0.0041625	0.477488	3.60564	10.1803	3.52034	0.63095	1.047	1.87279	0.0043125	-2.331	-2.30799	-2.31436	-2.26758	-2.23582							Testing	-2.40027	0.00858302	2.47225
[TBA]Br-methyldiethanol amine (1 : 3)	303.15	614.1	0	0.0041625	0.477488	3.60564	10.1803	3.52034	0.63095	1.047	1.87279	0.0043125	-2.1481	-2.11317	-2.13049	-2.07609	-2.08184							Testing	-2.22861	0.00861664	2.18128
[TBA]Br-methyldiethanol amine (1 : 3)	303.15	732.1	0	0.0041625	0.477488	3.60564	10.1803	3.52034	0.63095	1.047	1.87279	0.0043125	-1.9126	-1.9189	-1.94925	-1.88047	-1.93529							Training	-2.06037	0.00867514	1.97146
[TBA]Br-methyldiethanol amine (1 : 3)	303.15	816.7	0	0.0041625	0.477488	3.60564	10.1803	3.52034	0.63095	1.047	1.87279	0.0043125	-1.791	-1.79834	-1.83564	-1.753	-1.84387							Testing	-1.95511	0.00872994	1.67529
[TBA]Br-methyldiethanol amine (1 : 3)	303.15	1000	0	0.0041625	0.477488	3.60564	10.1803	3.52034	0.63095	1.047	1.87279	0.0043125	-1.5906	-1.58401	-1.62075	-1.50587	-1.66982							Training	-1.76205	0.00888555	2.07312
[Ach]Cl-Imidazole (1 : 3)	303.15	52.8	0.0007875	0.472237	0.888075	3.49863	2.59393	2.08973	1.31055	0.945913	1.26105	0.168988	-5.9145	-5.71614	-5.73177	-5.68566	-5.81003							Training	-5.77864	0.00621881	0.360433
[Ach]Cl-Imidazole (1 : 3)	303.15	91	0.0007875	0.472237	0.888075	3.49863	2.59393	2.08973	1.31055	0.945913	1.26105	0.168988	-5.2214	-5.21697	-5.24571	-5.19907	-5.40611							Testing	-5.42115	0.00619582	1.25422
[Ach]Cl-Imidazole (1 : 3)	303.15	200.3	0.0007875	0.472237	0.888075	3.49863	2.59393	2.08973	1.31055	0.945913	1.26105	0.168988	-4.5659	-4.42026	-4.46736	-4.36527	-4.58462							Testing	-4.60399	0.00614213	0.85714
[Ach]Cl-Imidazole (1 : 3)	303.15	291.4	0.0007875	0.472237	0.888075	3.49863	2.59393	2.08973	1.31055	0.945913	1.26105	0.168988	-4.1997	-4.09196	-4.14049	-4.03427	-4.15379							Testing	-4.16123	0.00611109	1.03081
[Ach]Cl-Imidazole (1 : 3)	303.15	385.4	0.0007875	0.472237	0.888075	3.49863	2.59393	2.08973	1.31055	0.945913	1.26105	0.168988	-3.9792	-3.87662	-3.92226	-3.85668	-3.85499							Testing	-3.87003	0.00609211	0.880479
[Ach]Cl-Imidazole (1 : 3)	303.15	478.6	0.0007875	0.472237	0.888075	3.49863	2.59393	2.08973	1.31055	0.945913	1.26105	0.168988	-3.7508	-3.72057	-3.76104	-3.75417	-3.64986							Testing	-3.6802	0.00608639	0.754094
[Ach]Cl-Imidazole (1 : 3)	303.15	567.6	0.0007875	0.472237	0.888075	3.49863	2.59393	2.08973	1.31055	0.945913	1.26105	0.168988	-3.5899	-3.60253	-3.63443	-3.6807	-3.50718							Testing	-3.54698	0.0060931	0.500798
[Ach]Cl-Imidazole (1 : 3)	313.15	29.2	0.0007875	0.472237	0.888075	3.49863	2.59393	2.08973	1.31055	0.945913	1.26105	0.168988	-6.0323	-6.36025	-6.31097	-6.28195	-6.29164							Testing	-6.24247	0.00596548	0.958703
[Ach]Cl-Imidazole (1 : 3)	313.15	59.9	0.0007875	0.472237	0.888075	3.49863	2.59393	2.08973	1.31055	0.945913	1.26105	0.168988	-5.684	-5.84861	-5.81319	-5.8241	-5.92582							Testing	-5.939	0.00594206	1.22775
[Ach]Cl-Imidazole (1 : 3)	313.15	87.8	0.0007875	0.472237	0.888075	3.49863	2.59393	2.08973	1.31055	0.945913	1.26105	0.168988	-5.3391	-5.49137	-5.46656	-5.4879	-5.63744							Training	-5.67852	0.005922	1.60545
[Ach]Cl-Imidazole (1 : 3)	313.15	140.2	0.0007875	0.472237	0.888075	3.49863	2.59393	2.08973	1.31055	0.945913	1.26105	0.168988	-4.9908	-5.0126	-5.00144	-5.01434	-5.18977							Testing	-5.24047	0.00588749	1.42657
[Ach]Cl-Imidazole (1 : 3)	313.15	233.6	0.0007875	0.472237	0.888075	3.49863	2.59393	2.08973	1.31055	0.945913	1.26105	0.168988	-4.5659	-4.5177	-4.51365	-4.50805	-4.61936							Testing	-4.6448	0.00583621	1.02198
[Ach]Cl-Imidazole (1 : 3)	313.15	337	0.0007875	0.472237	0.888075	3.49863	2.59393	2.08973	1.31055	0.945913	1.26105	0.168988	-4.2759	-4.21428	-4.20391	-4.21703	-4.2118							Testing	-4.22431	0.0057947	0.966611
[Ach]Cl-Imidazole (1 : 3)	313.15	424.5	0.0007875	0.472237	0.888075	3.49863	2.59393	2.08973	1.31055	0.945913	1.26105	0.168988	-4.057	-4.04118	-4.02061	-4.06898	-3.97992							Training	-3.9971	0.00577211	0.912143
[Ach]Cl-Imidazole (1 : 3)	313.15	522.8	0.0007875	0.472237	0.888075	3.49863	2.59393	2.08973	1.31055	0.945913	1.26105	0.168988	-3.8728	-3.8914	-3.85579	-3.94429	-3.79505							Training	-3.81805	0.00576044	0.642116
[Ach]Cl-Imidazole (1 : 3)	313.15	583.6	0.0007875	0.472237	0.888075	3.49863	2.59393	2.08973	1.31055	0.945913	1.26105	0.168988	-3.7766	-3.8147	-3.76738	-3.87571	-3.70712							Training	-3.72861	0.00576049	0.433178
[Ach]Cl-Imidazole (1 : 3)	323.15	26.3	0.0007875	0.472237	0.888075	3.49863	2.59393	2.08973	1.31055	0.945913	1.26105	0.168988	-6.5713	-6.6562	-6.5813	-6.58156	-6.52502							Training	-6.52377	0.00588683	0.302523
[Ach]Cl-Imidazole (1 : 3)	323.15	58	0.0007875	0.472237	0.888075	3.49863	2.59393	2.08973	1.31055	0.945913	1.26105	0.168988	-5.8781	-6.11654	-6.05534	-6.11543	-6.1478							Testing	-6.20834	0.00585874	1.31166
[Ach]Cl-Imidazole (1 : 3)	323.15	87.5	0.0007875	0.472237	0.888075	3.49863	2.59393	2.08973	1.31055	0.945913	1.26105	0.168988	-5.6268	-5.73528	-5.68427	-5.76738	-5.84521							Testing	-5.9314	0.00583395	1.3769
[Ach]Cl-Imidazole (1 : 3)	323.15	139.1	0.0007875	0.472237	0.888075	3.49863	2.59393	2.08973	1.31055	0.945913	1.26105	0.168988	-5.2214	-5.26142	-5.22115	-5.30918	-5.40867							Training	-5.49748	0.00579373	1.47674
[Ach]Cl-Imidazole (1 : 3)	323.15	238.7	0.0007875	0.472237	0.888075	3.49863	2.59393	2.08973	1.31055	0.945913	1.26105	0.168988	-4.8036	-4.73892	-4.69861	-4.77215	-4.81296							Training	-4.86334	0.0057274	0.922444
[Ach]Cl-Imidazole (1 : 3)	323.15	337.1	0.0007875	0.472237	0.888075	3.49863	2.59393	2.08973	1.31055	0.945913	1.26105	0.168988	-4.4741	-4.45326	-4.39884	-4.47636	-4.43451							Testing	-4.46278	0.00567649	0.939789
[Ach]Cl-Imidazole (1 : 3)	323.15	426	0.0007875	0.472237	0.888075	3.49863	2.59393	2.08973	1.31055	0.945913	1.26105	0.168988	-4.2616	-4.2762	-4.20515	-4.29756	-4.20233							Training	-4.22603	0.00564299	0.859603
[Ach]Cl-Imidazole (1 : 3)	323.15	531	0.0007875	0.472237	0.888075	3.49863	2.59393	2.08973	1.31055	0.945913	1.26105	0.168988	-4.0628	-4.11559	-4.02284	-4.1322	-4.00999							Training	-4.02818	0.00561871	0.576006
[Ach]Cl-Imidazole (1 : 3)	323.15	587.3	0.0007875	0.472237	0.888075	3.49863	2.59393	2.08973	1.31055	0.945913	1.26105	0.168988	-3.9633	-4.04406	-3.93837	-4.05341	-3.93077							Training	-3.94092	0.0056125	0.40717
[Ach]Cl-Imidazole (1 : 3)	333.15	28.6	0.0007875	0.472237	0.888075	3.49863	2.59393	2.08973	1.31055	0.945913	1.26105	0.168988	-7.1309	-6.85208	-6.90971	-6.81079	-6.69651							Training	-6.76756	0.0059909	-0.551207
[Ach]Cl-Imidazole (1 : 3)	333.15	58.3	0.0007875	0.472237	0.888075	3.49863	2.59393	2.08973	1.31055	0.945913	1.26105	0.168988	-6.4378	-6.35316	-6.42257	-6.38596	-6.35009							Training	-6.47132	0.00596107	0.556364
[Ach]Cl-Imidazole (1 : 3)	333.15	87.1	0.0007875	0.472237	0.888075	3.49863	2.59393	2.08973	1.31055	0.945913	1.26105	0.168988	-6.0748	-5.98119	-6.05946	-6.04999	-6.05861							Testing	-6.19968	0.00593342	0.845958
[Ach]Cl-Imidazole (1 : 3)	333.15	146.1	0.0007875	0.472237	0.888075	3.49863	2.59393	2.08973	1.31055	0.945913	1.26105	0.168988	-5.5728	-5.45288	-5.5405	-5.53617	-5.57349							Training	-5.70612	0.00588065	1.03122
[Ach]Cl-Imidazole (1 : 3)	333.15	239.7	0.0007875	0.472237	0.888075	3.49863	2.59393	2.08973	1.31055	0.945913	1.26105	0.168988	-5.0832	-4.97684	-5.06049	-5.0273	-5.03199							Training	-5.11522	0.00580766	0.696161
[Ach]Cl-Imidazole (1 : 3)	333.15	354.3	0.0007875	0.472237	0.888075	3.49863	2.59393	2.08973	1.31055	0.945913	1.26105	0.168988	-4.6995	-4.65529	-4.72053	-4.6624	-4.61261							Testing	-4.65853	0.0057362	0.729588
[Ach]Cl-Imidazole (1 : 3)	333.15	432.2	0.0007875	0.472237	0.888075	3.49863	2.59393	2.08973	1.31055	0.945913	1.26105	0.168988	-4.4918	-4.50473	-4.55607	-4.48913	-4.42119							Training	-4.4546	0.00569888	0.712799
[Ach]Cl-Imidazole (1 : 3)	333.15	525.8	0.0007875	0.472237	0.888075	3.49863	2.59393	2.08973	1.31055	0.945913	1.26105	0.168988	-4.2977	-4.35991	-4.39482	-4.3185	-4.25264							Testing	-4.26996	0.00566609	0.454175
[Ach]Cl-Imidazole (1 : 3)	333.15	591.6	0.0007875	0.472237	0.888075	3.49863	2.59393	2.08973	1.31055	0.945913	1.26105	0.168988	-4.1865	-4.27462	-4.2975	-4.2126	-4.16112							Training	-4.16116	0.0056509	0.290554
[Ch]Cl-Guaiacol (1 : 3)	293.15	51.5	0	0.1689	0.6585	4.55452	3.68593	2.98735	2.59416	0.897338	0.929225	0.00095	-6.1658	-6.14663	-6.16602	-6.14054	-6.002							Training	-6.07191	0.00431884	-1.44182
[Ch]Cl-Guaiacol (1 : 3)	293.15	138.1	0	0.1689	0.6585	4.55452	3.68593	2.98735	2.59416	0.897338	0.929225	0.00095	-5.203	-5.22923	-5.23968	-5.24696	-5.25357							Testing	-5.29973	0.0042864	-0.736168
[Ch]Cl-Guaiacol (1 : 3)	293.15	236.7	0	0.1689	0.6585	4.55452	3.68593	2.98735	2.59416	0.897338	0.929225	0.00095	-4.667	-4.68581	-4.68122	-4.66293	-4.68135							Training	-4.66439	0.00426317	-0.839739
[Ch]Cl-Guaiacol (1 : 3)	293.15	329.2	0	0.1689	0.6585	4.55452	3.68593	2.98735	2.59416	0.897338	0.929225	0.00095	-4.3351	-4.36804	-4.35092	-4.32908	-4.31286							Testing	-4.27606	0.00425464	-0.740733
[Ch]Cl-Guaiacol (1 : 3)	293.15	427.5	0	0.1689	0.6585	4.55452	3.68593	2.98735	2.59416	0.897338	0.929225	0.00095	-4.0804	-4.11167	-4.08837	-4.08803	-4.02996							Training	-4.00669	0.00425966	-0.822248
[Ch]Cl-Guaiacol (1 : 3)	293.15	529.4	0	0.1689	0.6585	4.55452	3.68593	2.98735	2.59416	0.897338	0.929225	0.00095	-3.8397	-3.88775	-3.86578	-3.90195	-3.80862							Testing	-3.81196	0.00428017	-1.00113
[Ch]Cl-Guaiacol (1 : 3)	303.15	55.3	0	0.1689	0.6585	4.55452	3.68593	2.98735	2.59416	0.897338	0.929225	0.00095	-6.2146	-6.24376	-6.25806	-6.22575	-6.14115							Testing	-6.193	0.00390273	-1.12869
[Ch]Cl-Guaiacol (1 : 3)	303.15	132.3	0	0.1689	0.6585	4.55452	3.68593	2.98735	2.59416	0.897338	0.929225	0.00095	-5.4037	-5.4272	-5.43312	-5.43944	-5.47684							Training	-5.51086	0.00386454	-0.574524
[Ch]Cl-Guaiacol (1 : 3)	303.15	243.8	0	0.1689	0.6585	4.55452	3.68593	2.98735	2.59416	0.897338	0.929225	0.00095	-4.8036	-4.81186	-4.8003	-4.78207	-4.83041							Testing	-4.80373	0.00382501	-0.792478
[Ch]Cl-Guaiacol (1 : 3)	303.15	335.5	0	0.1689	0.6585	4.55452	3.68593	2.98735	2.59416	0.897338	0.929225	0.00095	-4.483	-4.50468	-4.48108	-4.45894	-4.47216							Training	-4.43807	0.00380649	-0.671843
[Ch]Cl-Guaiacol (1 : 3)	303.15	433.8	0	0.1689	0.6585	4.55452	3.68593	2.98735	2.59416	0.897338	0.929225	0.00095	-4.2267	-4.25113	-4.22246	-4.2183	-4.19148							Training	-4.18274	0.00380065	-0.771396
[Ch]Cl-Guaiacol (1 : 3)	303.15	533.2	0	0.1689	0.6585	4.55452	3.68593	2.98735	2.59416	0.897338	0.929225	0.00095	-4.0286	-4.03311	-4.00721	-4.03311	-3.97418							Training	-4.00192	0.0038095	-1.01645
[Ch]Cl-Guaiacol (1 : 3)	313.15	57.5	0	0.1689	0.6585	4.55452	3.68593	2.98735	2.59416	0.897338	0.929225	0.00095	-6.3771	-6.3646	-6.37736	-6.34232	-6.29109							Training	-6.32245	0.00367415	-1.02766
[Ch]Cl-Guaiacol (1 : 3)	313.15	145.7	0	0.1689	0.6585	4.55452	3.68593	2.98735	2.59416	0.897338	0.929225	0.00095	-5.4968	-5.48188	-5.48396	-5.49273	-5.55855							Training	-5.56755	0.00362087	-0.523786
[Ch]Cl-Guaiacol (1 : 3)	313.15	233.2	0	0.1689	0.6585	4.55452	3.68593	2.98735	2.59416	0.897338	0.929225	0.00095	-5.036	-5.00955	-4.99721	-4.98742	-5.05711							Training	-5.02529	0.00357954	-0.803117
[Ch]Cl-Guaiacol (1 : 3)	313.15	330.3	0	0.1689	0.6585	4.55452	3.68593	2.98735	2.59416	0.897338	0.929225	0.00095	-4.6777	-4.67426	-4.64862	-4.63027	-4.6653							Testing	-4.63181	0.00354714	-0.676002
[Ch]Cl-Guaiacol (1 : 3)	313.15	429.6	0	0.1689	0.6585	4.55452	3.68593	2.98735	2.59416	0.897338	0.929225	0.00095	-4.4063	-4.41505	-4.38442	-4.37843	-4.37502							Training	-4.37658	0.00352865	-0.723914
[Ch]Cl-Guaiacol (1 : 3)	313.15	529.4	0	0.1689	0.6585	4.55452	3.68593	2.98735	2.59416	0.897338	0.929225	0.00095	-4.1997	-4.19388	-4.16689	-4.18472	-4.15123							Training	-4.19977	0.00352497	-0.951745
[Ch]Cl-Guaiacol (1 : 3)	323.15	63.1	0	0.1689	0.6585	4.55452	3.68593	2.98735	2.59416	0.897338	0.929225	0.00095	-6.5713	-6.43944	-6.45432	-6.42739	-6.40305							Training	-6.41068	0.00362974	-1.07646
[Ch]Cl-Guaiacol (1 : 3)	323.15	160.6	0	0.1689	0.6585	4.55452	3.68593	2.98735	2.59416	0.897338	0.929225	0.00095	-5.5468	-5.53557	-5.53729	-5.55331	-5.63185							Training	-5.61193	0.00356066	-0.39797
[Ch]Cl-Guaiacol (1 : 3)	323.15	239.9	0	0.1689	0.6585	4.55452	3.68593	2.98735	2.59416	0.897338	0.929225	0.00095	-5.1673	-5.13584	-5.12389	-5.12359	-5.19821							Testing	-5.15093	0.00351499	-0.741474
[Ch]Cl-Guaiacol (1 : 3)	323.15	341.4	0	0.1689	0.6585	4.55452	3.68593	2.98735	2.59416	0.897338	0.929225	0.00095	-4.7915	-4.79639	-4.77118	-4.76124	-4.80033							Testing	-4.76533	0.00347031	-0.584588
[Ch]Cl-Guaiacol (1 : 3)	323.15	442.6	0	0.1689	0.6585	4.55452	3.68593	2.98735	2.59416	0.897338	0.929225	0.00095	-4.5375	-4.53799	-4.50945	-4.50881	-4.51251							Testing	-4.52581	0.00344116	-0.707925
[Ch]Cl-Guaiacol (1 : 3)	323.15	536.5	0	0.1689	0.6585	4.55452	3.68593	2.98735	2.59416	0.897338	0.929225	0.00095	-4.3583	-4.33165	-4.30829	-4.32477	-4.30405							Testing	-4.3706	0.00342787	-0.953282
DiethylammoniumCl-Guaiacol (1 : 3)	293.15	45.1	0.191263	0.429013	0.405388	4.2653	3.89695	3.11601	2.43045	0.522637	1.18836	0.154425	-6.0323	-6.04106	-6.01839	-5.99295	-5.96226							Testing	-5.90684	0.0194472	-0.798133
DiethylammoniumCl-Guaiacol (1 : 3)	293.15	137.1	0.191263	0.429013	0.405388	4.2653	3.89695	3.11601	2.43045	0.522637	1.18836	0.154425	-5.036	-5.0078	-5.02631	-5.02051	-5.09775							Training	-5.10176	0.0194318	-0.0672773
DiethylammoniumCl-Guaiacol (1 : 3)	293.15	222.8	0.191263	0.429013	0.405388	4.2653	3.89695	3.11601	2.43045	0.522637	1.18836	0.154425	-4.5469	-4.51712	-4.52926	-4.49284	-4.5604							Testing	-4.55307	0.0194288	-0.250521
DiethylammoniumCl-Guaiacol (1 : 3)	293.15	320.6	0.191263	0.429013	0.405388	4.2653	3.89695	3.11601	2.43045	0.522637	1.18836	0.154425	-4.1734	-4.17293	-4.17238	-4.1169	-4.14445							Training	-4.14248	0.019439	-0.0377423
DiethylammoniumCl-Guaiacol (1 : 3)	293.15	414.9	0.191263	0.429013	0.405388	4.2653	3.89695	3.11601	2.43045	0.522637	1.18836	0.154425	-3.912	-3.92571	-3.92796	-3.86985	-3.86762							Testing	-3.89308	0.0194624	-0.130561
DiethylammoniumCl-Guaiacol (1 : 3)	293.15	517.7	0.191263	0.429013	0.405388	4.2653	3.89695	3.11601	2.43045	0.522637	1.18836	0.154425	-3.6929	-3.6941	-3.72159	-3.66333	-3.65027							Training	-3.71049	0.0195031	-0.316335
DiethylammoniumCl-Guaiacol (1 : 3)	303.15	53.9	0.191263	0.429013	0.405388	4.2653	3.89695	3.11601	2.43045	0.522637	1.18836	0.154425	-6.0323	-6.03029	-6.01713	-6.00592	-5.97902							Testing	-5.93991	0.0192053	-0.451923
DiethylammoniumCl-Guaiacol (1 : 3)	303.15	133.6	0.191263	0.429013	0.405388	4.2653	3.89695	3.11601	2.43045	0.522637	1.18836	0.154425	-5.116	-5.16389	-5.18209	-5.19642	-5.24701							Testing	-5.24973	0.0191827	0.274559
DiethylammoniumCl-Guaiacol (1 : 3)	303.15	241.5	0.191263	0.429013	0.405388	4.2653	3.89695	3.11601	2.43045	0.522637	1.18836	0.154425	-4.5756	-4.57142	-4.57858	-4.56547	-4.59399							Testing	-4.58312	0.0191673	-0.0153223
DiethylammoniumCl-Guaiacol (1 : 3)	303.15	339.1	0.191263	0.429013	0.405388	4.2653	3.89695	3.11601	2.43045	0.522637	1.18836	0.154425	-4.2475	-4.25377	-4.24884	-4.22498	-4.2097							Training	-4.21004	0.0191685	0.0962552
DiethylammoniumCl-Guaiacol (1 : 3)	303.15	428.8	0.191263	0.429013	0.405388	4.2653	3.89695	3.11601	2.43045	0.522637	1.18836	0.154425	-4.0174	-4.02723	-4.02736	-4.00478	-3.96066							Testing	-3.98936	0.0191821	-0.039378
DiethylammoniumCl-Guaiacol (1 : 3)	303.15	513.5	0.191263	0.429013	0.405388	4.2653	3.89695	3.11601	2.43045	0.522637	1.18836	0.154425	-3.8351	-3.83802	-3.85963	-3.83876	-3.78319							Testing	-3.84051	0.0192061	-0.212811
DiethylammoniumCl-Guaiacol (1 : 3)	313.15	59.2	0.191263	0.429013	0.405388	4.2653	3.89695	3.11601	2.43045	0.522637	1.18836	0.154425	-6.0323	-6.07976	-6.06929	-6.07537	-6.04276							Testing	-6.02128	0.0191503	-0.0443425
DiethylammoniumCl-Guaiacol (1 : 3)	313.15	182.9	0.191263	0.429013	0.405388	4.2653	3.89695	3.11601	2.43045	0.522637	1.18836	0.154425	-4.9908	-4.97352	-4.98598	-5.01203	-5.03969							Training	-5.04188	0.0191055	0.241497
DiethylammoniumCl-Guaiacol (1 : 3)	313.15	271.2	0.191263	0.429013	0.405388	4.2653	3.89695	3.11601	2.43045	0.522637	1.18836	0.154425	-4.6052	-4.59483	-4.59148	-4.59921	-4.59225							Training	-4.58666	0.0190876	0.179844
DiethylammoniumCl-Guaiacol (1 : 3)	313.15	357.5	0.191263	0.429013	0.405388	4.2653	3.89695	3.11601	2.43045	0.522637	1.18836	0.154425	-4.3351	-4.33811	-4.32603	-4.32772	-4.28367							Testing	-4.29343	0.0190814	0.159216
DiethylammoniumCl-Guaiacol (1 : 3)	313.15	436.4	0.191263	0.429013	0.405388	4.2653	3.89695	3.11601	2.43045	0.522637	1.18836	0.154425	-4.1414	-4.14445	-4.13851	-4.14118	-4.07378							Testing	-4.10896	0.0190855	0.0530208
DiethylammoniumCl-Guaiacol (1 : 3)	313.15	524.6	0.191263	0.429013	0.405388	4.2653	3.89695	3.11601	2.43045	0.522637	1.18836	0.154425	-3.9686	-3.94976	-3.96768	-3.9709	-3.89243							Training	-3.95599	0.0191012	-0.133758
DiethylammoniumCl-Guaiacol (1 : 3)	323.15	56.6	0.191263	0.429013	0.405388	4.2653	3.89695	3.11601	2.43045	0.522637	1.18836	0.154425	-6.2659	-6.24431	-6.22757	-6.2578	-6.19571							Training	-6.18224	0.019286	-0.00387341
DiethylammoniumCl-Guaiacol (1 : 3)	323.15	143.4	0.191263	0.429013	0.405388	4.2653	3.89695	3.11601	2.43045	0.522637	1.18836	0.154425	-5.3602	-5.35039	-5.35975	-5.42905	-5.43314							Training	-5.4486	0.0192415	0.5851
DiethylammoniumCl-Guaiacol (1 : 3)	323.15	246	0.191263	0.429013	0.405388	4.2653	3.89695	3.11601	2.43045	0.522637	1.18836	0.154425	-4.8283	-4.8186	-4.81169	-4.85852	-4.83881							Testing	-4.83696	0.0192034	0.233873
DiethylammoniumCl-Guaiacol (1 : 3)	323.15	331.9	0.191263	0.429013	0.405388	4.2653	3.89695	3.11601	2.43045	0.522637	1.18836	0.154425	-4.5469	-4.54167	-4.52125	-4.55501	-4.50093							Testing	-4.50661	0.0191836	0.281711
DiethylammoniumCl-Guaiacol (1 : 3)	323.15	428.9	0.191263	0.429013	0.405388	4.2653	3.89695	3.11601	2.43045	0.522637	1.18836	0.154425	-4.2904	-4.29712	-4.27957	-4.30812	-4.22681							Training	-4.26029	0.0191746	0.234249
DiethylammoniumCl-Guaiacol (1 : 3)	323.15	525.4	0.191263	0.429013	0.405388	4.2653	3.89695	3.11601	2.43045	0.522637	1.18836	0.154425	-4.0864	-4.08389	-4.09138	-4.11541	-4.02477							Training	-4.0877	0.0191797	0.0239566
[Ach]Cl-Guaiacol (1 : 3)	293.15	53.7	0	0.1689	0.657787	4.64384	4.37761	3.1353	2.64424	1.01244	0.9027	0.0033125	-5.9522	-5.98173	-5.9817	-5.96791	-5.86652							Testing	-5.93271	0.00542595	-1.16253
[Ach]Cl-Guaiacol (1 : 3)	293.15	144.3	0	0.1689	0.657787	4.64384	4.37761	3.1353	2.64424	1.01244	0.9027	0.0033125	-5.0207	-5.01086	-4.99635	-5.03927	-5.08095							Testing	-5.13233	0.00539608	-0.591939
[Ach]Cl-Guaiacol (1 : 3)	293.15	234.1	0	0.1689	0.657787	4.64384	4.37761	3.1353	2.64424	1.01244	0.9027	0.0033125	-4.5008	-4.51013	-4.49032	-4.5134	-4.54883							Training	-4.55691	0.00537863	-0.613347
[Ach]Cl-Guaiacol (1 : 3)	293.15	331.7	0	0.1689	0.657787	4.64384	4.37761	3.1353	2.64424	1.01244	0.9027	0.0033125	-4.1352	-4.17159	-4.15126	-4.16954	-4.14353							Training	-4.14433	0.0053734	-0.449445
[Ach]Cl-Guaiacol (1 : 3)	293.15	428.8	0	0.1689	0.657787	4.64384	4.37761	3.1353	2.64424	1.01244	0.9027	0.0033125	-3.8776	-3.921	-3.90712	-3.94778	-3.85047							Testing	-3.877	0.00538238	-0.562695
[Ach]Cl-Guaiacol (1 : 3)	293.15	528.6	0	0.1689	0.657787	4.64384	4.37761	3.1353	2.64424	1.01244	0.9027	0.0033125	-3.6652	-3.70467	-3.70354	-3.78474	-3.6187							Training	-3.68246	0.00540636	-0.751428
[Ach]Cl-Guaiacol (1 : 3)	303.15	53.8	0	0.1689	0.657787	4.64384	4.37761	3.1353	2.64424	1.01244	0.9027	0.0033125	-6.0748	-6.11064	-6.12262	-6.06949	-6.0145							Training	-6.06977	0.00501655	-0.930282
[Ach]Cl-Guaiacol (1 : 3)	303.15	139.6	0	0.1689	0.657787	4.64384	4.37761	3.1353	2.64424	1.01244	0.9027	0.0033125	-5.1673	-5.17841	-5.17557	-5.18982	-5.2689							Training	-5.31495	0.00497769	-0.319167
[Ach]Cl-Guaiacol (1 : 3)	303.15	227.1	0	0.1689	0.657787	4.64384	4.37761	3.1353	2.64424	1.01244	0.9027	0.0033125	-4.6777	-4.67381	-4.66482	-4.66208	-4.74003							Training	-4.74924	0.00494943	-0.539384
[Ach]Cl-Guaiacol (1 : 3)	303.15	329.5	0	0.1689	0.657787	4.64384	4.37761	3.1353	2.64424	1.01244	0.9027	0.0033125	-4.3125	-4.31188	-4.30171	-4.28865	-4.30655							Testing	-4.31616	0.00493096	-0.438745
[Ach]Cl-Guaiacol (1 : 3)	303.15	431.7	0	0.1689	0.657787	4.64384	4.37761	3.1353	2.64424	1.01244	0.9027	0.0033125	-4.0456	-4.04788	-4.04481	-4.04803	-3.99515							Training	-4.04332	0.00492822	-0.513362
[Ach]Cl-Guaiacol (1 : 3)	303.15	531.2	0	0.1689	0.657787	4.64384	4.37761	3.1353	2.64424	1.01244	0.9027	0.0033125	-3.8444	-3.83223	-3.84279	-3.87788	-3.76114							Training	-3.85825	0.00494061	-0.751807
[Ach]Cl-Guaiacol (1 : 3)	313.15	54.1	0	0.1689	0.657787	4.64384	4.37761	3.1353	2.64424	1.01244	0.9027	0.0033125	-6.2659	-6.23455	-6.2623	-6.17851	-6.16048							Training	-6.19654	0.00479437	-0.876954
[Ach]Cl-Guaiacol (1 : 3)	313.15	147.8	0	0.1689	0.657787	4.64384	4.37761	3.1353	2.64424	1.01244	0.9027	0.0033125	-5.2785	-5.2484	-5.25971	-5.25304	-5.3645							Testing	-5.39277	0.00474129	-0.249865
[Ach]Cl-Guaiacol (1 : 3)	313.15	235	0	0.1689	0.657787	4.64384	4.37761	3.1353	2.64424	1.01244	0.9027	0.0033125	-4.8159	-4.7715	-4.77634	-4.7529	-4.85476							Training	-4.8571	0.00470373	-0.480863
[Ach]Cl-Guaiacol (1 : 3)	313.15	338	0	0.1689	0.657787	4.64384	4.37761	3.1353	2.64424	1.01244	0.9027	0.0033125	-4.4482	-4.41964	-4.42352	-4.3882	-4.42899							Training	-4.44807	0.00467408	-0.350755
[Ach]Cl-Guaiacol (1 : 3)	313.15	434.5	0	0.1689	0.657787	4.64384	4.37761	3.1353	2.64424	1.01244	0.9027	0.0033125	-4.1997	-4.17344	-4.18468	-4.15967	-4.13615							Training	-4.20546	0.00466074	-0.45583
[Ach]Cl-Guaiacol (1 : 3)	313.15	535.3	0	0.1689	0.657787	4.64384	4.37761	3.1353	2.64424	1.01244	0.9027	0.0033125	-3.99	-3.95523	-3.98117	-3.98075	-3.89576							Testing	-4.02796	0.00466174	-0.706024
[Ach]Cl-Guaiacol (1 : 3)	323.15	55.9	0	0.1689	0.657787	4.64384	4.37761	3.1353	2.64424	1.01244	0.9027	0.0033125	-6.32	-6.3339	-6.38142	-6.27784	-6.28805							Training	-6.30031	0.00475834	-0.52653
[Ach]Cl-Guaiacol (1 : 3)	323.15	143.5	0	0.1689	0.657787	4.64384	4.37761	3.1353	2.64424	1.01244	0.9027	0.0033125	-5.3817	-5.40812	-5.43925	-5.41873	-5.54411							Training	-5.5552	0.00469805	0.125215
[Ach]Cl-Guaiacol (1 : 3)	323.15	239.4	0	0.1689	0.657787	4.64384	4.37761	3.1353	2.64424	1.01244	0.9027	0.0033125	-4.8929	-4.883	-4.9061	-4.8696	-4.983							Testing	-4.97616	0.00464526	-0.283492
[Ach]Cl-Guaiacol (1 : 3)	323.15	337.9	0	0.1689	0.657787	4.64384	4.37761	3.1353	2.64424	1.01244	0.9027	0.0033125	-4.5564	-4.55034	-4.57224	-4.52149	-4.57662							Testing	-4.59906	0.00460541	-0.196594
[Ach]Cl-Guaiacol (1 : 3)	323.15	438	0	0.1689	0.657787	4.64384	4.37761	3.1353	2.64424	1.01244	0.9027	0.0033125	-4.3051	-4.29567	-4.32545	-4.27963	-4.27003							Testing	-4.35783	0.00457984	-0.318449
[Ach]Cl-Guaiacol (1 : 3)	323.15	533	0	0.1689	0.657787	4.64384	4.37761	3.1353	2.64424	1.01244	0.9027	0.0033125	-4.1166	-4.08961	-4.13387	-4.10434	-4.03899							Testing	-4.19847	0.00456948	-0.549989
[Ach]Cl-Levulinic acid (1 : 3)	303.15	65.7	0	0	0.624975	5.95319	4.34622	1.0632	1.18995	2.34762	1.25962	0.0033125	-5.203	-5.26413	-5.28574	-5.40833	-5.27172							Testing	-5.32125	0.00532641	0.708623
[Ach]Cl-Levulinic acid (1 : 3)	303.15	120.4	0	0	0.624975	5.95319	4.34622	1.0632	1.18995	2.34762	1.25962	0.0033125	-4.6565	-4.68931	-4.68842	-4.88566	-4.78944							Training	-4.85642	0.00531174	1.07326
[Ach]Cl-Levulinic acid (1 : 3)	303.15	200	0	0	0.624975	5.95319	4.34622	1.0632	1.18995	2.34762	1.25962	0.0033125	-4.2131	-4.18327	-4.16919	-4.36002	-4.2712							Training	-4.32315	0.00529842	0.697943
[Ach]Cl-Levulinic acid (1 : 3)	303.15	283.4	0	0	0.624975	5.95319	4.34622	1.0632	1.18995	2.34762	1.25962	0.0033125	-3.868	-3.86188	-3.84172	-3.98588	-3.88946							Training	-3.92689	0.00529466	0.831386
[Ach]Cl-Levulinic acid (1 : 3)	303.15	388.3	0	0	0.624975	5.95319	4.34622	1.0632	1.18995	2.34762	1.25962	0.0033125	-3.572	-3.59033	-3.56678	-3.65047	-3.55778							Testing	-3.59107	0.00530476	0.727126
[Ach]Cl-Levulinic acid (1 : 3)	303.15	474.2	0	0	0.624975	5.95319	4.34622	1.0632	1.18995	2.34762	1.25962	0.0033125	-3.3873	-3.41933	-3.3956	-3.43507	-3.36311							Training	-3.39464	0.00532533	0.598485
[Ach]Cl-Levulinic acid (1 : 3)	303.15	542.7	0	0	0.624975	5.95319	4.34622	1.0632	1.18995	2.34762	1.25962	0.0033125	-3.2623	-3.30154	-3.27897	-3.28497	-3.23948							Training	-3.26571	0.00534967	0.402375
[Ach]Cl-Levulinic acid (1 : 3)	313.15	72.3	0	0	0.624975	5.95319	4.34622	1.0632	1.18995	2.34762	1.25962	0.0033125	-5.4037	-5.41288	-5.51223	-5.48735	-5.41167							Testing	-5.44136	0.00506783	0.628183
[Ach]Cl-Levulinic acid (1 : 3)	313.15	132.3	0	0	0.624975	5.95319	4.34622	1.0632	1.18995	2.34762	1.25962	0.0033125	-4.8796	-4.82737	-4.90119	-4.95283	-4.91236							Training	-4.95031	0.00504538	0.843455
[Ach]Cl-Levulinic acid (1 : 3)	313.15	215.1	0	0	0.624975	5.95319	4.34622	1.0632	1.18995	2.34762	1.25962	0.0033125	-4.3662	-4.34724	-4.40404	-4.44854	-4.41234							Testing	-4.43061	0.00502327	0.538224
[Ach]Cl-Levulinic acid (1 : 3)	313.15	315.4	0	0	0.624975	5.95319	4.34622	1.0632	1.18995	2.34762	1.25962	0.0033125	-4.0174	-4.00131	-4.04602	-4.03982	-4.00102							Training	-4.00635	0.00501028	0.690446
[Ach]Cl-Levulinic acid (1 : 3)	313.15	410.2	0	0	0.624975	5.95319	4.34622	1.0632	1.18995	2.34762	1.25962	0.0033125	-3.7942	-3.77571	-3.81304	-3.75793	-3.73364							Training	-3.73991	0.00501188	0.537752
[Ach]Cl-Levulinic acid (1 : 3)	313.15	511.8	0	0	0.624975	5.95319	4.34622	1.0632	1.18995	2.34762	1.25962	0.0033125	-3.5791	-3.58394	-3.61671	-3.5128	-3.52544							Testing	-3.533	0.00502857	0.274948
[Ach]Cl-Levulinic acid (1 : 3)	313.15	570.1	0	0	0.624975	5.95319	4.34622	1.0632	1.18995	2.34762	1.25962	0.0033125	-3.4738	-3.48802	-3.51934	-3.38772	-3.42934							Training	-3.43452	0.00504515	0.147622
[Ach]Cl-Levulinic acid (1 : 3)	323.15	77.5	0	0	0.624975	5.95319	4.34622	1.0632	1.18995	2.34762	1.25962	0.0033125	-5.655	-5.58042	-5.63676	-5.58881	-5.57111							Training	-5.57666	0.00499583	0.500756
[Ach]Cl-Levulinic acid (1 : 3)	323.15	129.9	0	0	0.624975	5.95319	4.34622	1.0632	1.18995	2.34762	1.25962	0.0033125	-5.1499	-5.07685	-5.11029	-5.13437	-5.14434							Training	-5.15321	0.00497005	0.757812
[Ach]Cl-Levulinic acid (1 : 3)	323.15	220.1	0	0	0.624975	5.95319	4.34622	1.0632	1.18995	2.34762	1.25962	0.0033125	-4.6356	-4.55695	-4.57004	-4.59434	-4.60953							Training	-4.59604	0.00493534	0.360542
[Ach]Cl-Levulinic acid (1 : 3)	323.15	317.1	0	0	0.624975	5.95319	4.34622	1.0632	1.18995	2.34762	1.25962	0.0033125	-4.2759	-4.22782	-4.22772	-4.20598	-4.22218							Training	-4.19859	0.00491164	0.509028
[Ach]Cl-Levulinic acid (1 : 3)	323.15	414.7	0	0	0.624975	5.95319	4.34622	1.0632	1.18995	2.34762	1.25962	0.0033125	-4.0118	-3.99689	-3.98798	-3.91627	-3.95238							Testing	-3.9341	0.00490204	0.388517
[Ach]Cl-Levulinic acid (1 : 3)	323.15	512.3	0	0	0.624975	5.95319	4.34622	1.0632	1.18995	2.34762	1.25962	0.0033125	-3.8122	-3.81267	-3.79845	-3.67823	-3.75485							Training	-3.74405	0.00490674	0.204351
[Ach]Cl-Levulinic acid (1 : 3)	323.15	576.4	0	0	0.624975	5.95319	4.34622	1.0632	1.18995	2.34762	1.25962	0.0033125	-3.6929	-3.70703	-3.69071	-3.53817	-3.64991							Testing	-3.64155	0.00491761	-0.0101005
[Ach]Cl-Levulinic acid (1 : 3)	333.15	83	0	0	0.624975	5.95319	4.34622	1.0632	1.18995	2.34762	1.25962	0.0033125	-5.684	-5.74434	-5.74113	-5.6941	-5.72853							Training	-5.69851	0.00510979	0.84435
[Ach]Cl-Levulinic acid (1 : 3)	333.15	133.5	0	0	0.624975	5.95319	4.34622	1.0632	1.18995	2.34762	1.25962	0.0033125	-5.24	-5.2773	-5.25244	-5.27488	-5.33092							Training	-5.29968	0.00507924	0.990924
[Ach]Cl-Levulinic acid (1 : 3)	333.15	223.6	0	0	0.624975	5.95319	4.34622	1.0632	1.18995	2.34762	1.25962	0.0033125	-4.7795	-4.77075	-4.72478	-4.75164	-4.81107							Training	-4.757	0.00503425	0.468237
[Ach]Cl-Levulinic acid (1 : 3)	333.15	320.6	0	0	0.624975	5.95319	4.34622	1.0632	1.18995	2.34762	1.25962	0.0033125	-4.4482	-4.44689	-4.38683	-4.37013	-4.43266							Testing	-4.37181	0.00499943	0.472399
[Ach]Cl-Levulinic acid (1 : 3)	333.15	415.2	0	0	0.624975	5.95319	4.34622	1.0632	1.18995	2.34762	1.25962	0.0033125	-4.1997	-4.22401	-4.15475	-4.08953	-4.17445							Testing	-4.12368	0.00497908	0.382755
[Ach]Cl-Levulinic acid (1 : 3)	333.15	513.3	0	0	0.624975	5.95319	4.34622	1.0632	1.18995	2.34762	1.25962	0.0033125	-3.9954	-4.03837	-3.9633	-3.84729	-3.97622							Testing	-3.93985	0.00497216	0.166027
[Ach]Cl-Levulinic acid (1 : 3)	333.15	571.6	0	0	0.624975	5.95319	4.34622	1.0632	1.18995	2.34762	1.25962	0.0033125	-3.8971	-3.94152	-3.8643	-3.7171	-3.87978							Testing	-3.8507	0.00497489	-0.0163516
[TEA]Cl-Levulinic acid (1 : 3)	303.15	66.1	0	0	0.300737	6.03329	4.58603	1.33674	0.990463	1.96768	1.29779	0.0688625	-5.4262	-5.50807	-5.56442	-5.52563	-5.49287							Testing	-5.42607	0.0048313	0.125378
[TEA]Cl-Levulinic acid (1 : 3)	303.15	125.6	0	0	0.300737	6.03329	4.58603	1.33674	0.990463	1.96768	1.29779	0.0688625	-4.8036	-4.87591	-4.92183	-4.94501	-4.96739							Training	-4.91885	0.0048377	0.572422
[TEA]Cl-Levulinic acid (1 : 3)	303.15	211.6	0	0	0.300737	6.03329	4.58603	1.33674	0.990463	1.96768	1.29779	0.0688625	-4.2904	-4.3366	-4.36575	-4.39382	-4.41671							Training	-4.35194	0.00485634	0.284987
[TEA]Cl-Levulinic acid (1 : 3)	303.15	302.8	0	0	0.300737	6.03329	4.58603	1.33674	0.990463	1.96768	1.29779	0.0688625	-3.9686	-3.99048	-4.00324	-4.01919	-4.01309							Testing	-3.93968	0.00488824	0.347657
[TEA]Cl-Levulinic acid (1 : 3)	303.15	404.1	0	0	0.300737	6.03329	4.58603	1.33674	0.990463	1.96768	1.29779	0.0688625	-3.6969	-3.72068	-3.72362	-3.73217	-3.69988							Training	-3.63452	0.00493831	0.30659
[TEA]Cl-Levulinic acid (1 : 3)	303.15	500.2	0	0	0.300737	6.03329	4.58603	1.33674	0.990463	1.96768	1.29779	0.0688625	-3.49	-3.51582	-3.51999	-3.52371	-3.48289							Testing	-3.42832	0.00500004	0.0680163
[TEA]Cl-Levulinic acid (1 : 3)	303.15	561.6	0	0	0.300737	6.03329	4.58603	1.33674	0.990463	1.96768	1.29779	0.0688625	-3.3814	-3.40024	-3.41024	-3.40881	-3.37031							Testing	-3.31978	0.00504674	-0.1123
[TEA]Cl-Levulinic acid (1 : 3)	313.15	77.6	0	0	0.300737	6.03329	4.58603	1.33674	0.990463	1.96768	1.29779	0.0688625	-5.5728	-5.53076	-5.56884	-5.5305	-5.5297							Training	-5.48809	0.00499765	0.12276
[TEA]Cl-Levulinic acid (1 : 3)	313.15	131.8	0	0	0.300737	6.03329	4.58603	1.33674	0.990463	1.96768	1.29779	0.0688625	-5.036	-4.9956	-5.02429	-5.03972	-5.07468							Training	-5.04292	0.00499771	0.422574
[TEA]Cl-Levulinic acid (1 : 3)	313.15	219.8	0	0	0.300737	6.03329	4.58603	1.33674	0.990463	1.96768	1.29779	0.0688625	-4.5469	-4.46885	-4.48061	-4.50549	-4.53291							Testing	-4.48656	0.00500718	0.024505
[TEA]Cl-Levulinic acid (1 : 3)	313.15	316.9	0	0	0.300737	6.03329	4.58603	1.33674	0.990463	1.96768	1.29779	0.0688625	-4.1734	-4.11718	-4.11292	-4.12799	-4.12383							Testing	-4.0757	0.00503113	0.207021
[TEA]Cl-Levulinic acid (1 : 3)	313.15	416.9	0	0	0.300737	6.03329	4.58603	1.33674	0.990463	1.96768	1.29779	0.0688625	-3.8971	-3.85931	-3.84796	-3.85548	-3.82946							Testing	-3.79708	0.00507059	0.14382
[TEA]Cl-Levulinic acid (1 : 3)	313.15	516.4	0	0	0.300737	6.03329	4.58603	1.33674	0.990463	1.96768	1.29779	0.0688625	-3.677	-3.65081	-3.64378	-3.64264	-3.61337							Training	-3.59899	0.00512475	-0.0104112
[TEA]Cl-Levulinic acid (1 : 3)	313.15	581.3	0	0	0.300737	6.03329	4.58603	1.33674	0.990463	1.96768	1.29779	0.0688625	-3.5614	-3.53045	-3.53171	-3.52131	-3.49853							Testing	-3.49271	0.00516808	-0.234854
[TEA]Cl-Levulinic acid (1 : 3)	323.15	78	0	0	0.300737	6.03329	4.58603	1.33674	0.990463	1.96768	1.29779	0.0688625	-5.655	-5.69701	-5.7199	-5.66165	-5.67134							Training	-5.66213	0.00535048	0.431784
[TEA]Cl-Levulinic acid (1 : 3)	323.15	144.1	0	0	0.300737	6.03329	4.58603	1.33674	0.990463	1.96768	1.29779	0.0688625	-5.0672	-5.07362	-5.08499	-5.0954	-5.13697							Training	-5.13522	0.00534325	0.639344
[TEA]Cl-Levulinic acid (1 : 3)	323.15	229.1	0	0	0.300737	6.03329	4.58603	1.33674	0.990463	1.96768	1.29779	0.0688625	-4.6052	-4.59937	-4.59456	-4.61612	-4.64215							Training	-4.62733	0.0053436	0.299032
[TEA]Cl-Levulinic acid (1 : 3)	323.15	325.9	0	0	0.300737	6.03329	4.58603	1.33674	0.990463	1.96768	1.29779	0.0688625	-4.2616	-4.26168	-4.24218	-4.25675	-4.25142							Training	-4.24031	0.0053572	0.416659
[TEA]Cl-Levulinic acid (1 : 3)	323.15	421.6	0	0	0.300737	6.03329	4.58603	1.33674	0.990463	1.96768	1.29779	0.0688625	-4.0118	-4.0182	-3.99367	-4.00059	-3.97746							Training	-3.98663	0.00538447	0.320399
[TEA]Cl-Levulinic acid (1 : 3)	323.15	526	0	0	0.300737	6.03329	4.58603	1.33674	0.990463	1.96768	1.29779	0.0688625	-3.8032	-3.80027	-3.78251	-3.77698	-3.75512							Training	-3.78888	0.00542991	0.0642804
[TEA]Cl-Levulinic acid (1 : 3)	323.15	585.4	0	0	0.300737	6.03329	4.58603	1.33674	0.990463	1.96768	1.29779	0.0688625	-3.6969	-3.69008	-3.6812	-3.66437	-3.65133							Training	-3.69646	0.00546306	-0.110728
[TEA]Cl-Levulinic acid (1 : 3)	333.15	84	0	0	0.300737	6.03329	4.58603	1.33674	0.990463	1.96768	1.29779	0.0688625	-5.8781	-5.79844	-5.80632	-5.73762	-5.75814							Training	-5.78402	0.00588903	0.307503
[TEA]Cl-Levulinic acid (1 : 3)	333.15	140.7	0	0	0.300737	6.03329	4.58603	1.33674	0.990463	1.96768	1.29779	0.0688625	-5.2983	-5.27147	-5.26946	-5.26638	-5.30795							Testing	-5.33663	0.00587614	0.615308
[TEA]Cl-Levulinic acid (1 : 3)	333.15	228.8	0	0	0.300737	6.03329	4.58603	1.33674	0.990463	1.96768	1.29779	0.0688625	-4.7795	-4.7735	-4.75487	-4.77266	-4.79601							Training	-4.8101	0.0058657	0.331053
[TEA]Cl-Levulinic acid (1 : 3)	333.15	331.2	0	0	0.300737	6.03329	4.58603	1.33674	0.990463	1.96768	1.29779	0.0688625	-4.4063	-4.41865	-4.38527	-4.39915	-4.38971							Training	-4.40915	0.0058682	0.478472
[TEA]Cl-Levulinic acid (1 : 3)	333.15	429.2	0	0	0.300737	6.03329	4.58603	1.33674	0.990463	1.96768	1.29779	0.0688625	-4.1541	-4.17199	-4.13516	-4.14096	-4.11659							Testing	-4.15953	0.00588534	0.328162
[TEA]Cl-Levulinic acid (1 : 3)	333.15	529.2	0	0	0.300737	6.03329	4.58603	1.33674	0.990463	1.96768	1.29779	0.0688625	-3.9373	-3.96356	-3.93507	-3.92624	-3.90735							Testing	-3.97709	0.00591768	0.127039
[TEA]Cl-Levulinic acid (1 : 3)	333.15	583.3	0	0	0.300737	6.03329	4.58603	1.33674	0.990463	1.96768	1.29779	0.0688625	-3.8351	-3.86237	-3.84276	-3.82168	-3.81298							Testing	-3.89534	0.00594144	-0.016745
[TEA]Br-Levulinic acid (1 : 3)	303.15	68.7	0	0	0.31945	6.00949	4.68414	1.20575	1.01361	2.09346	1.35888	0	-5.4968	-5.47001	-5.46997	-5.49374	-5.44999							Training	-5.49365	0.00420931	-0.0524692
[TEA]Br-Levulinic acid (1 : 3)	303.15	122.4	0	0	0.31945	6.00949	4.68414	1.20575	1.01361	2.09346	1.35888	0	-4.9199	-4.92874	-4.93175	-4.9967	-4.99119							Testing	-5.04424	0.00420227	0.308282
[TEA]Br-Levulinic acid (1 : 3)	303.15	210.3	0	0	0.31945	6.00949	4.68414	1.20575	1.01361	2.09346	1.35888	0	-4.4063	-4.3827	-4.38033	-4.44212	-4.44481							Training	-4.47512	0.00420008	0.0166516
[TEA]Br-Levulinic acid (1 : 3)	303.15	305.1	0	0	0.31945	6.00949	4.68414	1.20575	1.01361	2.09346	1.35888	0	-4.0342	-4.0212	-4.00481	-4.04755	-4.04632							Training	-4.05522	0.00421073	0.216019
[TEA]Br-Levulinic acid (1 : 3)	303.15	402.4	0	0	0.31945	6.00949	4.68414	1.20575	1.01361	2.09346	1.35888	0	-3.7636	-3.75851	-3.72587	-3.75349	-3.76461							Testing	-3.76112	0.00423568	0.118437
[TEA]Br-Levulinic acid (1 : 3)	303.15	500.5	0	0	0.31945	6.00949	4.68414	1.20575	1.01361	2.09346	1.35888	0	-3.5474	-3.54996	-3.50155	-3.51442	-3.55989							Training	-3.54392	0.00427522	-0.0354752
[TEA]Br-Levulinic acid (1 : 3)	303.15	564.4	0	0	0.31945	6.00949	4.68414	1.20575	1.01361	2.09346	1.35888	0	-3.4296	-3.43429	-3.37567	-3.37624	-3.45385							Training	-3.4271	0.00430875	-0.215592
[TEA]Br-Levulinic acid (1 : 3)	313.15	84.2	0	0	0.31945	6.00949	4.68414	1.20575	1.01361	2.09346	1.35888	0	-5.3817	-5.46977	-5.48437	-5.49465	-5.46644							Training	-5.49962	0.00415265	0.45298
[TEA]Br-Levulinic acid (1 : 3)	313.15	139.1	0	0	0.31945	6.00949	4.68414	1.20575	1.01361	2.09346	1.35888	0	-4.9477	-4.9801	-4.99566	-5.03943	-5.03433							Testing	-5.06841	0.0041402	0.451527
[TEA]Br-Levulinic acid (1 : 3)	313.15	230.1	0	0	0.31945	6.00949	4.68414	1.20575	1.01361	2.09346	1.35888	0	-4.4741	-4.47456	-4.48157	-4.52141	-4.51515							Training	-4.52831	0.00412952	0.156214
[TEA]Br-Levulinic acid (1 : 3)	313.15	329.1	0	0	0.31945	6.00949	4.68414	1.20575	1.01361	2.09346	1.35888	0	-4.1289	-4.1298	-4.12087	-4.14321	-4.13482							Testing	-4.13596	0.00413203	0.220767
[TEA]Br-Levulinic acid (1 : 3)	313.15	428.9	0	0	0.31945	6.00949	4.68414	1.20575	1.01361	2.09346	1.35888	0	-3.8776	-3.87778	-3.85226	-3.8584	-3.8697							Testing	-3.86838	0.00414944	0.101022
[TEA]Br-Levulinic acid (1 : 3)	313.15	525.9	0	0	0.31945	6.00949	4.68414	1.20575	1.01361	2.09346	1.35888	0	-3.6889	-3.68141	-3.64068	-3.62805	-3.68045							Training	-3.67616	0.0041807	-0.110364
[TEA]Br-Levulinic acid (1 : 3)	313.15	587.7	0	0	0.31945	6.00949	4.68414	1.20575	1.01361	2.09346	1.35888	0	-3.5791	-3.57387	-3.52339	-3.49503	-3.58234							Testing	-3.57395	0.00420797	-0.324476
[TEA]Br-Levulinic acid (1 : 3)	323.15	83.1	0	0	0.31945	6.00949	4.68414	1.20575	1.01361	2.09346	1.35888	0	-5.7138	-5.65618	-5.69094	-5.66544	-5.62943							Training	-5.65465	0.00428626	0.197966
[TEA]Br-Levulinic acid (1 : 3)	323.15	138.5	0	0	0.31945	6.00949	4.68414	1.20575	1.01361	2.09346	1.35888	0	-5.203	-5.15959	-5.19471	-5.21189	-5.19537							Training	-5.22251	0.00426698	0.414842
[TEA]Br-Levulinic acid (1 : 3)	323.15	236.2	0	0	0.31945	6.00949	4.68414	1.20575	1.01361	2.09346	1.35888	0	-4.667	-4.62461	-4.64932	-4.66895	-4.64763							Testing	-4.65662	0.00424421	0.0604625
[TEA]Br-Levulinic acid (1 : 3)	323.15	323.8	0	0	0.31945	6.00949	4.68414	1.20575	1.01361	2.09346	1.35888	0	-4.3505	-4.3209	-4.33092	-4.33703	-4.31343							Training	-4.31768	0.00423598	0.217905
[TEA]Br-Levulinic acid (1 : 3)	323.15	423.9	0	0	0.31945	6.00949	4.68414	1.20575	1.01361	2.09346	1.35888	0	-4.0804	-4.06418	-4.05732	-4.04647	-4.0426							Training	-4.05248	0.00424068	0.138062
[TEA]Br-Levulinic acid (1 : 3)	323.15	528.3	0	0	0.31945	6.00949	4.68414	1.20575	1.01361	2.09346	1.35888	0	-3.8728	-3.85136	-3.82824	-3.79443	-3.83678							Training	-3.85359	0.0042616	-0.120421
[TEA]Br-Levulinic acid (1 : 3)	323.15	578.8	0	0	0.31945	6.00949	4.68414	1.20575	1.01361	2.09346	1.35888	0	-3.7723	-3.76252	-3.73158	-3.68318	-3.75521							Training	-3.77403	0.00427759	-0.245263
[TEA]Br-Levulinic acid (1 : 3)	333.15	81.8	0	0	0.31945	6.00949	4.68414	1.20575	1.01361	2.09346	1.35888	0	-5.8091	-5.83945	-5.90134	-5.83725	-5.78748							Training	-5.79927	0.00460759	0.506422
[TEA]Br-Levulinic acid (1 : 3)	333.15	141	0	0	0.31945	6.00949	4.68414	1.20575	1.01361	2.09346	1.35888	0	-5.2785	-5.31129	-5.37269	-5.36268	-5.32907							Testing	-5.34249	0.00457995	0.652441
[TEA]Br-Levulinic acid (1 : 3)	333.15	233.4	0	0	0.31945	6.00949	4.68414	1.20575	1.01361	2.09346	1.35888	0	-4.7915	-4.8067	-4.85718	-4.85665	-4.8153							Training	-4.81367	0.00454732	0.266033
[TEA]Br-Levulinic acid (1 : 3)	333.15	327.9	0	0	0.31945	6.00949	4.68414	1.20575	1.01361	2.09346	1.35888	0	-4.4741	-4.47939	-4.51337	-4.5011	-4.45726							Testing	-4.45527	0.00452721	0.295655
[TEA]Br-Levulinic acid (1 : 3)	333.15	429.6	0	0	0.31945	6.00949	4.68414	1.20575	1.01361	2.09346	1.35888	0	-4.1931	-4.2214	-4.23799	-4.20825	-4.18711							Training	-4.19791	0.00452054	0.272665
[TEA]Br-Levulinic acid (1 : 3)	333.15	529.4	0	0	0.31945	6.00949	4.68414	1.20575	1.01361	2.09346	1.35888	0	-3.99	-4.01867	-4.01974	-3.96572	-3.9918							Testing	-4.01714	0.00452909	-8.68017e-05
[TEA]Br-Levulinic acid (1 : 3)	333.15	587.8	0	0	0.31945	6.00949	4.68414	1.20575	1.01361	2.09346	1.35888	0	-3.8971	-3.91637	-3.90845	-3.8354	-3.89791							Training	-3.93056	0.00454103	-0.162955
[TBA]Cl-Levulinic acid (1 : 3)	303.15	63.2	0	0	0.287762	5.39606	7.16427	3.00779	0.9866	1.98286	1.1755	0.075675	-5.24	-5.17702	-5.19712	-5.12873	-5.17261							Training	-5.13577	0.00494872	0.15942
[TBA]Cl-Levulinic acid (1 : 3)	303.15	118.8	0	0	0.287762	5.39606	7.16427	3.00779	0.9866	1.98286	1.1755	0.075675	-4.6152	-4.61244	-4.60612	-4.61682	-4.69342							Testing	-4.65999	0.00496714	0.593731
[TBA]Cl-Levulinic acid (1 : 3)	303.15	200.6	0	0	0.287762	5.39606	7.16427	3.00779	0.9866	1.98286	1.1755	0.075675	-4.1166	-4.09401	-4.07019	-4.10715	-4.17032							Training	-4.10968	0.00500267	0.358111
[TBA]Cl-Levulinic acid (1 : 3)	303.15	293	0	0	0.287762	5.39606	7.16427	3.00779	0.9866	1.98286	1.1755	0.075675	-3.7297	-3.72638	-3.69455	-3.72964	-3.75562							Training	-3.67973	0.00505489	0.486007
[TBA]Cl-Levulinic acid (1 : 3)	303.15	389.8	0	0	0.287762	5.39606	7.16427	3.00779	0.9866	1.98286	1.1755	0.075675	-3.4483	-3.45237	-3.41905	-3.44882	-3.44695							Testing	-3.3791	0.00512334	0.411679
[TBA]Cl-Levulinic acid (1 : 3)	303.15	494.3	0	0	0.287762	5.39606	7.16427	3.00779	0.9866	1.98286	1.1755	0.075675	-3.2164	-3.21851	-3.18922	-3.2096	-3.20081							Training	-3.15092	0.00521302	0.254822
[TBA]Cl-Levulinic acid (1 : 3)	303.15	559.1	0	0	0.287762	5.39606	7.16427	3.00779	0.9866	1.98286	1.1755	0.075675	-3.0944	-3.09363	-3.06893	-3.07894	-3.07666							Testing	-3.03649	0.00527687	0.040713
[TBA]Cl-Levulinic acid (1 : 3)	313.15	69.7	0	0	0.287762	5.39606	7.16427	3.00779	0.9866	1.98286	1.1755	0.075675	-5.1328	-5.27627	-5.30331	-5.22369	-5.26033							Training	-5.2607	0.00461466	0.807162
[TBA]Cl-Levulinic acid (1 : 3)	313.15	127.3	0	0	0.287762	5.39606	7.16427	3.00779	0.9866	1.98286	1.1755	0.075675	-4.6052	-4.723	-4.72602	-4.7268	-4.78551							Training	-4.78354	0.00462749	1.02441
[TBA]Cl-Levulinic acid (1 : 3)	313.15	210.9	0	0	0.287762	5.39606	7.16427	3.00779	0.9866	1.98286	1.1755	0.075675	-4.1605	-4.22188	-4.21004	-4.23937	-4.2769							Testing	-4.24829	0.00465496	0.533302
[TBA]Cl-Levulinic acid (1 : 3)	313.15	310	0	0	0.287762	5.39606	7.16427	3.00779	0.9866	1.98286	1.1755	0.075675	-3.8167	-3.84769	-3.83035	-3.86005	-3.85805							Training	-3.82091	0.00470112	0.60027
[TBA]Cl-Levulinic acid (1 : 3)	313.15	409.1	0	0	0.287762	5.39606	7.16427	3.00779	0.9866	1.98286	1.1755	0.075675	-3.5474	-3.57855	-3.56298	-3.58701	-3.56214							Training	-3.54117	0.00476202	0.525712
[TBA]Cl-Levulinic acid (1 : 3)	313.15	509.6	0	0	0.287762	5.39606	7.16427	3.00779	0.9866	1.98286	1.1755	0.075675	-3.3382	-3.35851	-3.35002	-3.36179	-3.33684							Testing	-3.33941	0.00483883	0.257209
[TBA]Cl-Levulinic acid (1 : 3)	313.15	578.6	0	0	0.287762	5.39606	7.16427	3.00779	0.9866	1.98286	1.1755	0.075675	-3.2114	-3.22742	-3.22589	-3.22308	-3.20938							Training	-3.22641	0.00490035	0.103562
[TBA]Cl-Levulinic acid (1 : 3)	323.15	79.1	0	0	0.287762	5.39606	7.16427	3.00779	0.9866	1.98286	1.1755	0.075675	-5.3817	-5.34804	-5.37628	-5.29275	-5.32128							Training	-5.36332	0.00446668	0.561067
[TBA]Cl-Levulinic acid (1 : 3)	323.15	131.6	0	0	0.287762	5.39606	7.16427	3.00779	0.9866	1.98286	1.1755	0.075675	-4.9063	-4.86932	-4.87838	-4.86731	-4.90662							Testing	-4.94084	0.00447261	0.695542
[TBA]Cl-Levulinic acid (1 : 3)	323.15	229.6	0	0	0.287762	5.39606	7.16427	3.00779	0.9866	1.98286	1.1755	0.075675	-4.3428	-4.3163	-4.31145	-4.33586	-4.34335							Testing	-4.34736	0.00449477	0.332115
[TBA]Cl-Levulinic acid (1 : 3)	323.15	323.4	0	0	0.287762	5.39606	7.16427	3.00779	0.9866	1.98286	1.1755	0.075675	-3.9954	-3.98295	-3.976	-4.00252	-3.97392							Testing	-3.97588	0.00452947	0.477352
[TBA]Cl-Levulinic acid (1 : 3)	323.15	424.2	0	0	0.287762	5.39606	7.16427	3.00779	0.9866	1.98286	1.1755	0.075675	-3.7255	-3.71659	-3.71452	-3.73517	-3.68833							Testing	-3.71138	0.00458149	0.393686
[TBA]Cl-Levulinic acid (1 : 3)	323.15	524.4	0	0	0.287762	5.39606	7.16427	3.00779	0.9866	1.98286	1.1755	0.075675	-3.5166	-3.50055	-3.5086	-3.51422	-3.47308							Training	-3.52325	0.00464832	0.212951
[TBA]Cl-Levulinic acid (1 : 3)	323.15	591.6	0	0	0.287762	5.39606	7.16427	3.00779	0.9866	1.98286	1.1755	0.075675	-3.3962	-3.37391	-3.39064	-3.37923	-3.3526							Testing	-3.41947	0.00470158	-0.0209333
[TBA]Cl-Levulinic acid (1 : 3)	333.15	85	0	0	0.287762	5.39606	7.16427	3.00779	0.9866	1.98286	1.1755	0.075675	-5.5215	-5.46463	-5.49098	-5.39756	-5.41367							Training	-5.48766	0.00450405	0.63553
[TBA]Cl-Levulinic acid (1 : 3)	333.15	144.5	0	0	0.287762	5.39606	7.16427	3.00779	0.9866	1.98286	1.1755	0.075675	-4.9762	-4.95633	-4.96421	-4.95014	-4.96802							Testing	-5.02552	0.00450449	0.80783
[TBA]Cl-Levulinic acid (1 : 3)	333.15	236.5	0	0	0.287762	5.39606	7.16427	3.00779	0.9866	1.98286	1.1755	0.075675	-4.4918	-4.46588	-4.4638	-4.48462	-4.46691							Training	-4.49392	0.00451563	0.415573
[TBA]Cl-Levulinic acid (1 : 3)	333.15	335.5	0	0	0.287762	5.39606	7.16427	3.00779	0.9866	1.98286	1.1755	0.075675	-4.1477	-4.12404	-4.12236	-4.14841	-4.09405							Training	-4.12001	0.00454181	0.518591
[TBA]Cl-Levulinic acid (1 : 3)	333.15	431.7	0	0	0.287762	5.39606	7.16427	3.00779	0.9866	1.98286	1.1755	0.075675	-3.8922	-3.87367	-3.87934	-3.90027	-3.83213							Training	-3.87909	0.00458134	0.43222
[TBA]Cl-Levulinic acid (1 : 3)	333.15	533	0	0	0.287762	5.39606	7.16427	3.00779	0.9866	1.98286	1.1755	0.075675	-3.6652	-3.65577	-3.67442	-3.67861	-3.62017							Training	-3.69536	0.00463798	0.241857
[TBA]Cl-Levulinic acid (1 : 3)	333.15	589.8	0	0	0.287762	5.39606	7.16427	3.00779	0.9866	1.98286	1.1755	0.075675	-3.5649	-3.54788	-3.57532	-3.56388	-3.51957							Testing	-3.60982	0.00467648	0.0339951
[TBA]Br-Levulinic acid (1 : 3)	303.15	70.2	0	0	0.316125	5.5511	7.22032	2.88835	1.00378	2.09179	1.31333	0.0019875	-5.185	-5.16419	-5.14739	-5.07164	-5.16545							Training	-5.13261	0.00502907	0.211286
[TBA]Br-Levulinic acid (1 : 3)	303.15	122.9	0	0	0.316125	5.5511	7.22032	2.88835	1.00378	2.09179	1.31333	0.0019875	-4.6052	-4.66989	-4.65268	-4.63038	-4.71763							Training	-4.69582	0.00502858	0.639598
[TBA]Br-Levulinic acid (1 : 3)	303.15	206.2	0	0	0.316125	5.5511	7.22032	2.88835	1.00378	2.09179	1.31333	0.0019875	-4.1166	-4.16355	-4.15063	-4.14763	-4.18766							Testing	-4.15722	0.00503632	0.26306
[TBA]Br-Levulinic acid (1 : 3)	303.15	301.7	0	0	0.316125	5.5511	7.22032	2.88835	1.00378	2.09179	1.31333	0.0019875	-3.7508	-3.78579	-3.78	-3.77696	-3.76122							Testing	-3.73067	0.00505801	0.375833
[TBA]Br-Levulinic acid (1 : 3)	303.15	401.5	0	0	0.316125	5.5511	7.22032	2.88835	1.00378	2.09179	1.31333	0.0019875	-3.4705	-3.49405	-3.49881	-3.49287	-3.44386							Training	-3.42765	0.00509531	0.366431
[TBA]Br-Levulinic acid (1 : 3)	303.15	500.4	0	0	0.316125	5.5511	7.22032	2.88835	1.00378	2.09179	1.31333	0.0019875	-3.2623	-3.25654	-3.27535	-3.2609	-3.20734							Training	-3.2081	0.00514701	0.148843
[TBA]Br-Levulinic acid (1 : 3)	303.15	568.2	0	0	0.316125	5.5511	7.22032	2.88835	1.00378	2.09179	1.31333	0.0019875	-3.1419	-3.11281	-3.14289	-3.11664	-3.07343							Training	-3.08398	0.00519094	-0.0531189
[TBA]Br-Levulinic acid (1 : 3)	313.15	82.6	0	0	0.316125	5.5511	7.22032	2.88835	1.00378	2.09179	1.31333	0.0019875	-5.203	-5.19711	-5.17648	-5.1216	-5.21591							Testing	-5.19561	0.00458746	0.412571
[TBA]Br-Levulinic acid (1 : 3)	313.15	198	0	0	0.316125	5.5511	7.22032	2.88835	1.00378	2.09179	1.31333	0.0019875	-4.3275	-4.37028	-4.35385	-4.36573	-4.40491							Testing	-4.38398	0.00458015	0.41849
[TBA]Br-Levulinic acid (1 : 3)	313.15	290.6	0	0	0.316125	5.5511	7.22032	2.88835	1.00378	2.09179	1.31333	0.0019875	-3.9477	-3.98889	-3.97967	-3.99541	-3.97907							Testing	-3.96094	0.00458874	0.430835
[TBA]Br-Levulinic acid (1 : 3)	313.15	400.4	0	0	0.316125	5.5511	7.22032	2.88835	1.00378	2.09179	1.31333	0.0019875	-3.6306	-3.66094	-3.66412	-3.67652	-3.62379							Testing	-3.62864	0.00461561	0.393249
[TBA]Br-Levulinic acid (1 : 3)	313.15	499.9	0	0	0.316125	5.5511	7.22032	2.88835	1.00378	2.09179	1.31333	0.0019875	-3.4112	-3.41995	-3.43841	-3.43975	-3.38531							Training	-3.41627	0.00465559	0.242355
[TBA]Br-Levulinic acid (1 : 3)	313.15	568.4	0	0	0.316125	5.5511	7.22032	2.88835	1.00378	2.09179	1.31333	0.0019875	-3.2914	-3.27345	-3.30419	-3.29101	-3.24952							Testing	-3.29743	0.00469174	-0.00264414
[TBA]Br-Levulinic acid (1 : 3)	323.15	101.1	0	0	0.316125	5.5511	7.22032	2.88835	1.00378	2.09179	1.31333	0.0019875	-5.185	-5.1846	-5.16015	-5.13102	-5.22046							Training	-5.19812	0.00432897	0.679685
[TBA]Br-Levulinic acid (1 : 3)	323.15	201.4	0	0	0.316125	5.5511	7.22032	2.88835	1.00378	2.09179	1.31333	0.0019875	-4.5659	-4.519	-4.49915	-4.52478	-4.55605							Training	-4.52944	0.00431225	0.34956
[TBA]Br-Levulinic acid (1 : 3)	323.15	306.9	0	0	0.316125	5.5511	7.22032	2.88835	1.00378	2.09179	1.31333	0.0019875	-4.1105	-4.09882	-4.08787	-4.12095	-4.09115							Testing	-4.07428	0.00431095	0.372075
[TBA]Br-Levulinic acid (1 : 3)	323.15	402.3	0	0	0.316125	5.5511	7.22032	2.88835	1.00378	2.09179	1.31333	0.0019875	-3.8304	-3.81946	-3.82029	-3.8504	-3.79335							Training	-3.80346	0.00432416	0.393706
[TBA]Br-Levulinic acid (1 : 3)	323.15	502.9	0	0	0.316125	5.5511	7.22032	2.88835	1.00378	2.09179	1.31333	0.0019875	-3.6009	-3.57522	-3.59257	-3.60955	-3.55417							Training	-3.59853	0.00435289	0.214278
[TBA]Br-Levulinic acid (1 : 3)	323.15	566.6	0	0	0.316125	5.5511	7.22032	2.88835	1.00378	2.09179	1.31333	0.0019875	-3.4835	-3.43808	-3.46754	-3.46913	-3.42798							Testing	-3.49378	0.00437894	-0.0019573
[TBA]Br-Levulinic acid (1 : 3)	333.15	85.3	0	0	0.316125	5.5511	7.22032	2.88835	1.00378	2.09179	1.31333	0.0019875	-5.5728	-5.49877	-5.47148	-5.4173	-5.51194							Testing	-5.45689	0.00426626	0.509055
[TBA]Br-Levulinic acid (1 : 3)	333.15	142.3	0	0	0.316125	5.5511	7.22032	2.88835	1.00378	2.09179	1.31333	0.0019875	-5.036	-5.02518	-4.99868	-5.00896	-5.07634							Testing	-5.02314	0.00424672	0.753888
[TBA]Br-Levulinic acid (1 : 3)	333.15	230.7	0	0	0.316125	5.5511	7.22032	2.88835	1.00378	2.09179	1.31333	0.0019875	-4.519	-4.54784	-4.52677	-4.56869	-4.57611							Training	-4.51906	0.00422606	0.446934
[TBA]Br-Levulinic acid (1 : 3)	333.15	326	0	0	0.316125	5.5511	7.22032	2.88835	1.00378	2.09179	1.31333	0.0019875	-4.1799	-4.20064	-4.18859	-4.23756	-4.19543							Testing	-4.15556	0.00421693	0.510116
[TBA]Br-Levulinic acid (1 : 3)	333.15	423.2	0	0	0.316125	5.5511	7.22032	2.88835	1.00378	2.09179	1.31333	0.0019875	-3.912	-3.9273	-3.92863	-3.97376	-3.91162							Training	-3.90602	0.00422166	0.492744
[TBA]Br-Levulinic acid (1 : 3)	333.15	523.5	0	0	0.316125	5.5511	7.22032	2.88835	1.00378	2.09179	1.31333	0.0019875	-3.6969	-3.69018	-3.70951	-3.73788	-3.68549							Training	-3.72059	0.00424141	0.281422
[TBA]Br-Levulinic acid (1 : 3)	333.15	586.4	0	0	0.316125	5.5511	7.22032	2.88835	1.00378	2.09179	1.31333	0.0019875	-3.5863	-3.55741	-3.58956	-3.59946	-3.5656							Training	-3.62625	0.0042615	0.0914592
[Ch]Cl-Phenol (1 : 3)	313.15	2100	0.036225	0.414787	0.626363	3.78293	2.69851	2.7256	2.34468	0.863738	0.9254	0.00095	-2.443	-2.42941	-2.51124	-2.60807	-2.6905							Testing	-2.52316	0.00386501	0.0542323
[Ch]Cl-Phenol (1 : 3)	313.15	3660	0.036225	0.414787	0.626363	3.78293	2.69851	2.7256	2.34468	0.863738	0.9254	0.00095	-1.987	-2.00757	-2.01483	-1.92143	-2.06898							Testing	-2.089	0.00864343	-0.108437
[TMA]Cl-Phenol (1 : 3)	313.15	2360	0.036225	0.414787	0.47945	3.45395	2.95728	2.72925	2.19981	0.628387	0.920588	0.008	-2.3592	-2.29345	-2.46892	-2.38807	-2.43335							Testing	-2.53758	0.00502319	-0.0184488
[TMA]Cl-Phenol (1 : 3)	313.15	4470	0.036225	0.414787	0.47945	3.45395	2.95728	2.72925	2.19981	0.628387	0.920588	0.008	-1.974	-2.02965	-1.86657	-1.94467	-1.87693							Training	-2.09425	0.0129831	-0.754121
[TEA]Cl-Phenol (1 : 3)	313.15	2120	0.036225	0.414787	0.301413	3.95234	3.63	3.14709	2.19526	0.598888	0.937037	0.0688625	-2.5956	-2.59656	-2.51711	-2.46911	-2.65568							Training	-2.53217	0.00737326	-0.520283
[TEA]Cl-Phenol (1 : 3)	313.15	3410	0.036225	0.414787	0.301413	3.95234	3.63	3.14709	2.19526	0.598888	0.937037	0.0688625	-2.1681	-2.17536	-2.24447	-2.28683	-2.09906							Training	-2.17686	0.0116311	-0.53827
[TBA]Br-Hexanoic acid (1 : 3)	303.15	556	0.0399	0.38655	0.3465	2.4863	10.1712	5.21582	0.883025	1.47907	1.044	0.0019875	-2.8525	-2.86332	-2.82632	-2.83214	-2.93042							Training	-2.88647	0.00397544	0.453636
[TBA]Br-Hexanoic acid (1 : 3)	303.15	650	0.0399	0.38655	0.3465	2.4863	10.1712	5.21582	0.883025	1.47907	1.044	0.0019875	-2.6956	-2.71285	-2.69284	-2.70603	-2.78246							Training	-2.73895	0.00393476	0.149923
[TBA]Br-Hexanoic acid (1 : 3)	303.15	747	0.0399	0.38655	0.3465	2.4863	10.1712	5.21582	0.883025	1.47907	1.044	0.0019875	-2.5485	-2.5766	-2.57402	-2.59212	-2.65326							Testing	-2.60765	0.00390669	-0.230526
[TBA]Br-Hexanoic acid (1 : 3)	303.15	910	0.0399	0.38655	0.3465	2.4863	10.1712	5.21582	0.883025	1.47907	1.044	0.0019875	-2.3709	-2.38229	-2.40377	-2.42575	-2.4679							Training	-2.42069	0.00389132	-0.320969
[TBA]Br-Hexanoic acid (1 : 3)	303.15	987	0.0399	0.38655	0.3465	2.4863	10.1712	5.21582	0.883025	1.47907	1.044	0.0019875	-2.2916	-2.30287	-2.33268	-2.3556	-2.38898							Training	-2.34369	0.00389794	-0.194878
[TBA]Br-Hexanoic acid (1 : 3)	303.15	1090	0.0399	0.38655	0.3465	2.4863	10.1712	5.21582	0.883025	1.47907	1.044	0.0019875	-2.1821	-2.20671	-2.24502	-2.26885	-2.28907							Training	-2.24974	0.00392069	-0.0181173
[TBA]Br-Hexanoic acid (1 : 3)	303.15	1183	0.0399	0.38655	0.3465	2.4863	10.1712	5.21582	0.883025	1.47907	1.044	0.0019875	-2.1136	-2.12824	-2.17239	-2.1968	-2.20315							Training	-2.17238	0.00395492	0.0696777
[TBA]Br-Hexanoic acid (1 : 3)	313.15	466	0.0399	0.38655	0.3465	2.4863	10.1712	5.21582	0.883025	1.47907	1.044	0.0019875	-3.2365	-3.21714	-3.19275	-3.17576	-3.24736							Training	-3.20174	0.00401114	0.633664
[TBA]Br-Hexanoic acid (1 : 3)	313.15	580	0.0399	0.38655	0.3465	2.4863	10.1712	5.21582	0.883025	1.47907	1.044	0.0019875	-2.9858	-3.00903	-3.00204	-2.99219	-3.03025							Testing	-2.99617	0.00393445	0.364244
[TBA]Br-Hexanoic acid (1 : 3)	313.15	688	0.0399	0.38655	0.3465	2.4863	10.1712	5.21582	0.883025	1.47907	1.044	0.0019875	-2.8753	-2.84185	-2.84858	-2.84616	-2.86739							Testing	-2.83765	0.00387979	-0.139577
[TBA]Br-Hexanoic acid (1 : 3)	313.15	838	0.0399	0.38655	0.3465	2.4863	10.1712	5.21582	0.883025	1.47907	1.044	0.0019875	-2.6409	-2.64594	-2.66518	-2.66958	-2.67984							Training	-2.65357	0.00383293	-0.628136
[TBA]Br-Hexanoic acid (1 : 3)	313.15	946	0.0399	0.38655	0.3465	2.4863	10.1712	5.21582	0.883025	1.47907	1.044	0.0019875	-2.5307	-2.5258	-2.54977	-2.55575	-2.56102							Training	-2.53928	0.0038201	-0.478048
[TBA]Br-Hexanoic acid (1 : 3)	313.15	1044	0.0399	0.38655	0.3465	2.4863	10.1712	5.21582	0.883025	1.47907	1.044	0.0019875	-2.4453	-2.42908	-2.45533	-2.46032	-2.46052							Testing	-2.44558	0.00382361	-0.383258
[TBA]Br-Hexanoic acid (1 : 3)	313.15	1146	0.0399	0.38655	0.3465	2.4863	10.1712	5.21582	0.883025	1.47907	1.044	0.0019875	-2.357	-2.3387	-2.36646	-2.36809	-2.36122							Testing	-2.35619	0.00384257	-0.258326
[TBA]Br-Hexanoic acid (1 : 3)	323.15	502	0.0399	0.38655	0.3465	2.4863	10.1712	5.21582	0.883025	1.47907	1.044	0.0019875	-3.3668	-3.33706	-3.33389	-3.31734	-3.31777							Testing	-3.32692	0.00415218	0.463254
[TBA]Br-Hexanoic acid (1 : 3)	323.15	644	0.0399	0.38655	0.3465	2.4863	10.1712	5.21582	0.883025	1.47907	1.044	0.0019875	-3.1442	-3.09459	-3.1003	-3.0979	-3.07295							Testing	-3.09739	0.00405029	-0.0199657
[TBA]Br-Hexanoic acid (1 : 3)	323.15	748	0.0399	0.38655	0.3465	2.4863	10.1712	5.21582	0.883025	1.47907	1.044	0.0019875	-2.9151	-2.94514	-2.95354	-2.95862	-2.92865							Testing	-2.95944	0.00399488	-0.220724
[TBA]Br-Hexanoic acid (1 : 3)	323.15	861	0.0399	0.38655	0.3465	2.4863	10.1712	5.21582	0.883025	1.47907	1.044	0.0019875	-2.8117	-2.8039	-2.81247	-2.82016	-2.79094							Training	-2.82805	0.00395307	-0.755076
[TBA]Br-Hexanoic acid (1 : 3)	323.15	977	0.0399	0.38655	0.3465	2.4863	10.1712	5.21582	0.883025	1.47907	1.044	0.0019875	-2.6708	-2.67782	-2.68491	-2.68892	-2.66249							Training	-2.70785	0.00393009	-0.58456
[TBA]Br-Hexanoic acid (1 : 3)	323.15	1083	0.0399	0.38655	0.3465	2.4863	10.1712	5.21582	0.883025	1.47907	1.044	0.0019875	-2.6255	-2.57637	-2.58186	-2.57737	-2.55266							Training	-2.60792	0.00392675	-0.561987
[TBA]Br-Hexanoic acid (1 : 3)	323.15	1112	0.0399	0.38655	0.3465	2.4863	10.1712	5.21582	0.883025	1.47907	1.044	0.0019875	-2.5705	-2.55058	-2.55572	-2.54816	-2.52357							Testing	-2.58194	0.00392877	-0.48207
Betain-1,2-propanediol (1 : 3.5)	308.15	185.5	0.000155556	0.283733	0.813083	2.65296	4.03369	1.59564	0.726739	0.956806	1.19776	0.191933	-5.4037	-5.42731	-5.44561	-5.41653	-5.31552							Training	-5.44111	0.00543806	-0.850943
Betain-1,2-propanediol (1 : 3.5)	308.15	297.8	0.000155556	0.283733	0.813083	2.65296	4.03369	1.59564	0.726739	0.956806	1.19776	0.191933	-4.8929	-4.9075	-4.89437	-4.84046	-4.79102							Testing	-4.88527	0.00542578	-0.695435
Betain-1,2-propanediol (1 : 3.5)	308.15	401.5	0.000155556	0.283733	0.813083	2.65296	4.03369	1.59564	0.726739	0.956806	1.19776	0.191933	-4.5469	-4.59364	-4.5724	-4.51092	-4.46988							Testing	-4.55849	0.00543126	-0.623106
Betain-1,2-propanediol (1 : 3.5)	308.15	502.3	0.000155556	0.283733	0.813083	2.65296	4.03369	1.59564	0.726739	0.956806	1.19776	0.191933	-4.3428	-4.35535	-4.33213	-4.27912	-4.24443							Testing	-4.33118	0.00545205	-0.859297
Betain-1,2-propanediol (1 : 3.5)	308.15	602	0.000155556	0.283733	0.813083	2.65296	4.03369	1.59564	0.726739	0.956806	1.19776	0.191933	-4.1352	-4.15803	-4.13329	-4.09456	-4.07123							Training	-4.14781	0.00548762	-1.0646
Betain-1,2-propanediol (1 : 3.5)	318.15	195	0.000155556	0.283733	0.813083	2.65296	4.03369	1.59564	0.726739	0.956806	1.19776	0.191933	-5.5215	-5.5081	-5.54353	-5.50736	-5.42375							Training	-5.54106	0.00550827	-0.788852
Betain-1,2-propanediol (1 : 3.5)	318.15	313	0.000155556	0.283733	0.813083	2.65296	4.03369	1.59564	0.726739	0.956806	1.19776	0.191933	-5.0056	-4.9908	-4.99665	-4.93964	-4.90346							Training	-4.97962	0.00548342	-0.606291
Betain-1,2-propanediol (1 : 3.5)	318.15	430	0.000155556	0.283733	0.813083	2.65296	4.03369	1.59564	0.726739	0.956806	1.19776	0.191933	-4.646	-4.65482	-4.65357	-4.59189	-4.56854							Training	-4.63145	0.00547941	-0.595819
Betain-1,2-propanediol (1 : 3.5)	318.15	527.8	0.000155556	0.283733	0.813083	2.65296	4.03369	1.59564	0.726739	0.956806	1.19776	0.191933	-4.4312	-4.43295	-4.43068	-4.37695	-4.36602							Training	-4.41936	0.00549183	-0.789907
Betain-1,2-propanediol (1 : 3.5)	318.15	633	0.000155556	0.283733	0.813083	2.65296	4.03369	1.59564	0.726739	0.956806	1.19776	0.191933	-4.2267	-4.23138	-4.22759	-4.18536	-4.1934							Training	-4.22753	0.00552121	-1.06146
Betain-1,2-propanediol (1 : 3.5)	328.15	204.5	0.000155556	0.283733	0.813083	2.65296	4.03369	1.59564	0.726739	0.956806	1.19776	0.191933	-5.6268	-5.59082	-5.61479	-5.60405	-5.53439							Training	-5.62902	0.00576371	-0.697205
Betain-1,2-propanediol (1 : 3.5)	328.15	327.8	0.000155556	0.283733	0.813083	2.65296	4.03369	1.59564	0.726739	0.956806	1.19776	0.191933	-5.0995	-5.07666	-5.07473	-5.04528	-5.02051							Training	-5.06388	0.00572521	-0.492552
Betain-1,2-propanediol (1 : 3.5)	328.15	442	0.000155556	0.283733	0.813083	2.65296	4.03369	1.59564	0.726739	0.956806	1.19776	0.191933	-4.733	-4.75775	-4.75179	-4.71761	-4.70989							Training	-4.73286	0.00570991	-0.445669
Betain-1,2-propanediol (1 : 3.5)	328.15	552.5	0.000155556	0.283733	0.813083	2.65296	4.03369	1.59564	0.726739	0.956806	1.19776	0.191933	-4.519	-4.5123	-4.5074	-4.47878	-4.49195							Training	-4.49612	0.00571374	-0.732802
Betain-1,2-propanediol (1 : 3.5)	328.15	662.8	0.000155556	0.283733	0.813083	2.65296	4.03369	1.59564	0.726739	0.956806	1.19776	0.191933	-4.3125	-4.30701	-4.30197	-4.27967	-4.31981							Testing	-4.29627	0.00573584	-1.05183
Betain-1,2-propanediol (1 : 3.5)	338.15	213.5	0.000155556	0.283733	0.813083	2.65296	4.03369	1.59564	0.726739	0.956806	1.19776	0.191933	-5.7138	-5.67782	-5.69076	-5.70797	-5.64953							Testing	-5.71325	0.00620461	-0.578416
Betain-1,2-propanediol (1 : 3.5)	338.15	341.8	0.000155556	0.283733	0.813083	2.65296	4.03369	1.59564	0.726739	0.956806	1.19776	0.191933	-5.185	-5.16581	-5.15673	-5.15705	-5.14266							Training	-5.14468	0.00615139	-0.353209
Betain-1,2-propanediol (1 : 3.5)	338.15	461.3	0.000155556	0.283733	0.813083	2.65296	4.03369	1.59564	0.726739	0.956806	1.19776	0.191933	-4.8159	-4.84246	-4.83254	-4.82739	-4.83633							Testing	-4.80954	0.00612404	-0.367511
Betain-1,2-propanediol (1 : 3.5)	338.15	576.3	0.000155556	0.283733	0.813083	2.65296	4.03369	1.59564	0.726739	0.956806	1.19776	0.191933	-4.5952	-4.59328	-4.587	-4.58362	-4.62174							Testing	-4.56757	0.00611797	-0.665145
Betain-1,2-propanediol (1 : 3.5)	338.15	691.8	0.000155556	0.283733	0.813083	2.65296	4.03369	1.59564	0.726739	0.956806	1.19776	0.191933	-4.382	-4.38396	-4.37914	-4.37587	-4.44936							Testing	-4.35971	0.00613185	-0.983682
Betain-1,2-propanediol (1 : 3.5)	348.15	222.3	0.000155556	0.283733	0.813083	2.65296	4.03369	1.59564	0.726739	0.956806	1.19776	0.191933	-5.8091	-5.76697	-5.77285	-5.81558	-5.767							Training	-5.79846	0.00683097	-0.425536
Betain-1,2-propanediol (1 : 3.5)	348.15	355.5	0.000155556	0.283733	0.813083	2.65296	4.03369	1.59564	0.726739	0.956806	1.19776	0.191933	-5.2591	-5.25624	-5.24406	-5.27165	-5.26764							Testing	-5.22674	0.006762	-0.217063
Betain-1,2-propanediol (1 : 3.5)	348.15	480	0.000155556	0.283733	0.813083	2.65296	4.03369	1.59564	0.726739	0.956806	1.19776	0.191933	-4.8796	-4.92842	-4.91879	-4.93957	-4.96614							Training	-4.88764	0.00672161	-0.181068
Betain-1,2-propanediol (1 : 3.5)	348.15	599.5	0.000155556	0.283733	0.813083	2.65296	4.03369	1.59564	0.726739	0.956806	1.19776	0.191933	-4.6565	-4.67509	-4.67179	-4.68982	-4.7544							Testing	-4.64018	0.00670473	-0.537179
Betain-1,2-propanediol (1 : 3.5)	348.15	719.8	0.000155556	0.283733	0.813083	2.65296	4.03369	1.59564	0.726739	0.956806	1.19776	0.191933	-4.4482	-4.46237	-4.46218	-4.47342	-4.58202							Training	-4.42557	0.00670939	-0.882234
Betain-1,2-propanediol (1 : 4)	308.15	193.8	0.00016	0.29184	0.80304	2.55891	4.04473	1.62824	0.7377	0.96262	1.16937	0.17301	-5.3602	-5.35913	-5.39305	-5.39385	-5.37583							Training	-5.37682	0.00457388	-0.91932
Betain-1,2-propanediol (1 : 4)	308.15	303.3	0.00016	0.29184	0.80304	2.55891	4.04473	1.62824	0.7377	0.96262	1.16937	0.17301	-4.8536	-4.8599	-4.87609	-4.85735	-4.86529							Training	-4.85524	0.00454492	-0.641981
Betain-1,2-propanediol (1 : 4)	308.15	405.3	0.00016	0.29184	0.80304	2.55891	4.04473	1.62824	0.7377	0.96262	1.16937	0.17301	-4.519	-4.54629	-4.56298	-4.54432	-4.54352							Training	-4.54082	0.00453414	-0.582957
Betain-1,2-propanediol (1 : 4)	308.15	504.5	0.00016	0.29184	0.80304	2.55891	4.04473	1.62824	0.7377	0.96262	1.16937	0.17301	-4.3275	-4.30396	-4.3263	-4.32328	-4.31379							Testing	-4.31875	0.00453864	-0.861585
Betain-1,2-propanediol (1 : 4)	308.15	605	0.00016	0.29184	0.80304	2.55891	4.04473	1.62824	0.7377	0.96262	1.16937	0.17301	-4.1166	-4.09598	-4.12476	-4.14329	-4.131							Training	-4.13424	0.00455826	-1.06487
Betain-1,2-propanediol (1 : 4)	318.15	202.8	0.00016	0.29184	0.80304	2.55891	4.04473	1.62824	0.7377	0.96262	1.16937	0.17301	-5.4968	-5.45179	-5.48825	-5.48289	-5.48617							Training	-5.4902	0.00474865	-0.892737
Betain-1,2-propanediol (1 : 4)	318.15	317.8	0.00016	0.29184	0.80304	2.55891	4.04473	1.62824	0.7377	0.96262	1.16937	0.17301	-4.9618	-4.95251	-4.97336	-4.95273	-4.97765							Testing	-4.96187	0.00470649	-0.584841
Betain-1,2-propanediol (1 : 4)	318.15	420	0.00016	0.29184	0.80304	2.55891	4.04473	1.62824	0.7377	0.96262	1.16937	0.17301	-4.6565	-4.6486	-4.67141	-4.65305	-4.67199							Testing	-4.65689	0.00468568	-0.596301
Betain-1,2-propanediol (1 : 4)	318.15	528.5	0.00016	0.29184	0.80304	2.55891	4.04473	1.62824	0.7377	0.96262	1.16937	0.17301	-4.4228	-4.39016	-4.42028	-4.418	-4.43334							Testing	-4.41854	0.00468075	-0.818061
Betain-1,2-propanediol (1 : 4)	318.15	634	0.00016	0.29184	0.80304	2.55891	4.04473	1.62824	0.7377	0.96262	1.16937	0.17301	-4.2064	-4.17784	-4.2153	-4.23209	-4.25071							Testing	-4.2263	0.00469289	-1.05881
Betain-1,2-propanediol (1 : 4)	328.15	211	0.00016	0.29184	0.80304	2.55891	4.04473	1.62824	0.7377	0.96262	1.16937	0.17301	-5.5728	-5.55066	-5.56863	-5.58128	-5.60311							Testing	-5.59439	0.00510919	-0.730585
Betain-1,2-propanediol (1 : 4)	328.15	331.8	0.00016	0.29184	0.80304	2.55891	4.04473	1.62824	0.7377	0.96262	1.16937	0.17301	-5.0515	-5.04818	-5.05386	-5.05372	-5.09493							Testing	-5.05683	0.00505244	-0.457969
Betain-1,2-propanediol (1 : 4)	328.15	438.5	0.00016	0.29184	0.80304	2.55891	4.04473	1.62824	0.7377	0.96262	1.16937	0.17301	-4.7444	-4.7413	-4.75183	-4.75448	-4.79338							Training	-4.74909	0.00502053	-0.470221
Betain-1,2-propanediol (1 : 4)	328.15	552	0.00016	0.29184	0.80304	2.55891	4.04473	1.62824	0.7377	0.96262	1.16937	0.17301	-4.5099	-4.47785	-4.49841	-4.51492	-4.55673							Testing	-4.50474	0.00500535	-0.752011
Betain-1,2-propanediol (1 : 4)	328.15	662.5	0.00016	0.29184	0.80304	2.55891	4.04473	1.62824	0.7377	0.96262	1.16937	0.17301	-4.2977	-4.26109	-4.29097	-4.32198	-4.37368							Training	-4.30478	0.00500914	-1.02181
Betain-1,2-propanediol (1 : 4)	338.15	220	0.00016	0.29184	0.80304	2.55891	4.04473	1.62824	0.7377	0.96262	1.16937	0.17301	-5.684	-5.64667	-5.64653	-5.67893	-5.71766							Testing	-5.68564	0.0056547	-0.645646
Betain-1,2-propanediol (1 : 4)	338.15	345.5	0.00016	0.29184	0.80304	2.55891	4.04473	1.62824	0.7377	0.96262	1.16937	0.17301	-5.1328	-5.14581	-5.1372	-5.15869	-5.21578							Testing	-5.1448	0.00558284	-0.309515
Betain-1,2-propanediol (1 : 4)	338.15	456.8	0.00016	0.29184	0.80304	2.55891	4.04473	1.62824	0.7377	0.96262	1.16937	0.17301	-4.8283	-4.83496	-4.83438	-4.85816	-4.91788							Testing	-4.83343	0.00553889	-0.386863
Betain-1,2-propanediol (1 : 4)	338.15	574.5	0.00016	0.29184	0.80304	2.55891	4.04473	1.62824	0.7377	0.96262	1.16937	0.17301	-4.5756	-4.56785	-4.58024	-4.61432	-4.68431							Training	-4.58437	0.00551264	-0.605268
Betain-1,2-propanediol (1 : 4)	338.15	689.8	0.00016	0.29184	0.80304	2.55891	4.04473	1.62824	0.7377	0.96262	1.16937	0.17301	-4.3662	-4.3468	-4.37069	-4.41358	-4.50055							Training	-4.37733	0.00550709	-0.93773
Betain-1,2-propanediol (1 : 4)	348.15	225.8	0.00016	0.29184	0.80304	2.55891	4.04473	1.62824	0.7377	0.96262	1.16937	0.17301	-5.7764	-5.76012	-5.74587	-5.79678	-5.84935							Training	-5.79262	0.00638801	-0.433597
Betain-1,2-propanediol (1 : 4)	348.15	359	0.00016	0.29184	0.80304	2.55891	4.04473	1.62824	0.7377	0.96262	1.16937	0.17301	-5.2214	-5.24478	-5.22545	-5.26666	-5.33939							Training	-5.2322	0.00629771	-0.143462
Betain-1,2-propanediol (1 : 4)	348.15	474.3	0.00016	0.29184	0.80304	2.55891	4.04473	1.62824	0.7377	0.96262	1.16937	0.17301	-4.8929	-4.93084	-4.92283	-4.96491	-5.04637							Training	-4.91831	0.00624104	-0.194322
Betain-1,2-propanediol (1 : 4)	348.15	596.8	0.00016	0.29184	0.80304	2.55891	4.04473	1.62824	0.7377	0.96262	1.16937	0.17301	-4.646	-4.6583	-4.66641	-4.71428	-4.81426							Training	-4.66317	0.0062027	-0.489797
Betain-1,2-propanediol (1 : 4)	348.15	716.8	0.00016	0.29184	0.80304	2.55891	4.04473	1.62824	0.7377	0.96262	1.16937	0.17301	-4.4312	-4.43322	-4.45504	-4.50509	-4.62973							Testing	-4.44995	0.00618698	-0.862607
ChCl-DEG (1 : 4)	293.15	110.4	0	0.11608	1.01195	3.73249	5.44256	1.30326	0.84497	1.50136	1.65147	0.00076	-5.5468	-5.53447	-5.53399	-5.54641	-5.5716							Training	-5.49015	0.00415503	-0.754083
ChCl-DEG (1 : 4)	293.15	210.5	0	0.11608	1.01195	3.73249	5.44256	1.30326	0.84497	1.50136	1.65147	0.00076	-4.8409	-4.82784	-4.81253	-4.85282	-4.9138							Training	-4.85401	0.00407153	-0.753272
ChCl-DEG (1 : 4)	293.15	313.8	0	0.11608	1.01195	3.73249	5.44256	1.30326	0.84497	1.50136	1.65147	0.00076	-4.3982	-4.41782	-4.41344	-4.43097	-4.46345							Training	-4.41735	0.00400112	-0.447985
ChCl-DEG (1 : 4)	293.15	412.3	0	0.11608	1.01195	3.73249	5.44256	1.30326	0.84497	1.50136	1.65147	0.00076	-4.1105	-4.14655	-4.14913	-4.16307	-4.16285							Testing	-4.12756	0.00394891	-0.501343
ChCl-DEG (1 : 4)	293.15	508.8	0	0.11608	1.01195	3.73249	5.44256	1.30326	0.84497	1.50136	1.65147	0.00076	-3.8873	-3.93396	-3.93242	-3.96441	-3.94163							Training	-3.90917	0.00391188	-0.639626
ChCl-DEG (1 : 4)	303.15	115.8	0	0.11608	1.01195	3.73249	5.44256	1.30326	0.84497	1.50136	1.65147	0.00076	-5.684	-5.66195	-5.67708	-5.66002	-5.68161							Testing	-5.59301	0.0038051	-0.687418
ChCl-DEG (1 : 4)	303.15	218.4	0	0.11608	1.01195	3.73249	5.44256	1.30326	0.84497	1.50136	1.65147	0.00076	-5.0207	-4.96848	-4.96925	-4.98428	-5.03017							Testing	-4.96398	0.00370824	-0.813475
ChCl-DEG (1 : 4)	303.15	318.7	0	0.11608	1.01195	3.73249	5.44256	1.30326	0.84497	1.50136	1.65147	0.00076	-4.6152	-4.5814	-4.58955	-4.58867	-4.60489							Training	-4.55657	0.00362882	-0.554248
ChCl-DEG (1 : 4)	303.15	417.2	0	0.11608	1.01195	3.73249	5.44256	1.30326	0.84497	1.50136	1.65147	0.00076	-4.32	-4.31264	-4.32338	-4.32342	-4.30856							Testing	-4.27695	0.00356553	-0.588136
ChCl-DEG (1 : 4)	303.15	519	0	0.11608	1.01195	3.73249	5.44256	1.30326	0.84497	1.50136	1.65147	0.00076	-4.0923	-4.08994	-4.09295	-4.11377	-4.07801							Training	-4.05646	0.00351541	-0.755557
ChCl-DEG (1 : 4)	313.15	116.5	0	0.11608	1.01195	3.73249	5.44256	1.30326	0.84497	1.50136	1.65147	0.00076	-5.8091	-5.83584	-5.86502	-5.81428	-5.8302							Training	-5.75581	0.00364662	-0.462305
ChCl-DEG (1 : 4)	313.15	217.1	0	0.11608	1.01195	3.73249	5.44256	1.30326	0.84497	1.50136	1.65147	0.00076	-5.1328	-5.15546	-5.16745	-5.16143	-5.19531							Training	-5.14432	0.00353954	-0.606846
ChCl-DEG (1 : 4)	313.15	313.5	0	0.11608	1.01195	3.73249	5.44256	1.30326	0.84497	1.50136	1.65147	0.00076	-4.733	-4.77795	-4.79312	-4.77898	-4.78332							Training	-4.75324	0.00345119	-0.353468
ChCl-DEG (1 : 4)	313.15	416	0	0.11608	1.01195	3.73249	5.44256	1.30326	0.84497	1.50136	1.65147	0.00076	-4.4312	-4.4945	-4.50871	-4.49915	-4.47143							Testing	-4.46454	0.00337255	-0.404143
ChCl-DEG (1 : 4)	313.15	518.2	0	0.11608	1.01195	3.73249	5.44256	1.30326	0.84497	1.50136	1.65147	0.00076	-4.2199	-4.26902	-4.27427	-4.28545	-4.23801							Training	-4.24821	0.00330983	-0.609529
ChCl-DEG (1 : 4)	323.15	116.7	0	0.11608	1.01195	3.73249	5.44256	1.30326	0.84497	1.50136	1.65147	0.00076	-6.0748	-6.01531	-6.05528	-5.96795	-5.98325							Training	-5.94303	0.00367596	-0.583574
ChCl-DEG (1 : 4)	323.15	221.2	0	0.11608	1.01195	3.73249	5.44256	1.30326	0.84497	1.50136	1.65147	0.00076	-5.4037	-5.31727	-5.33632	-5.30895	-5.33386							Training	-5.31794	0.00355254	-0.834809
ChCl-DEG (1 : 4)	323.15	327.4	0	0.11608	1.01195	3.73249	5.44256	1.30326	0.84497	1.50136	1.65147	0.00076	-4.9337	-4.91543	-4.93338	-4.90704	-4.89578							Testing	-4.90598	0.00344391	-0.512184
ChCl-DEG (1 : 4)	323.15	419.2	0	0.11608	1.01195	3.73249	5.44256	1.30326	0.84497	1.50136	1.65147	0.00076	-4.646	-4.66668	-4.68024	-4.66378	-4.62402							Testing	-4.65847	0.00336366	-0.491259
ChCl-DEG (1 : 4)	323.15	526.9	0	0.11608	1.01195	3.73249	5.44256	1.30326	0.84497	1.50136	1.65147	0.00076	-4.4145	-4.42996	-4.43419	-4.43941	-4.38018							Training	-4.43769	0.00328563	-0.690104
ChCl-FA (1 : 4)	303.15	82.5	0	0.2244	0.84007	3.95593	2.777	2.56418	1.90317	0.9142	1.12319	0.00076	-5.7446	-5.75737	-5.73091	-5.75175	-5.76672							Training	-5.76115	0.00300651	-0.0614418
ChCl-FA (1 : 4)	303.15	212.1	0	0.2244	0.84007	3.95593	2.777	2.56418	1.90317	0.9142	1.12319	0.00076	-4.8036	-4.79427	-4.78441	-4.77476	-4.82359							Testing	-4.82019	0.00286039	-0.117809
ChCl-FA (1 : 4)	303.15	319.3	0	0.2244	0.84007	3.95593	2.777	2.56418	1.90317	0.9142	1.12319	0.00076	-4.3741	-4.39159	-4.37114	-4.34527	-4.35023							Training	-4.3563	0.00275857	0.162564
ChCl-FA (1 : 4)	303.15	412.5	0	0.2244	0.84007	3.95593	2.777	2.56418	1.90317	0.9142	1.12319	0.00076	-4.0984	-4.14111	-4.11266	-4.09589	-4.06583							Testing	-4.10404	0.00268407	0.106703
ChCl-FA (1 : 4)	303.15	519.3	0	0.2244	0.84007	3.95593	2.777	2.56418	1.90317	0.9142	1.12319	0.00076	-3.8873	-3.90644	-3.8749	-3.88048	-3.82613							Training	-3.90647	0.00261473	-0.121947
ChCl-FA (1 : 4)	303.15	581.5	0	0.2244	0.84007	3.95593	2.777	2.56418	1.90317	0.9142	1.12319	0.00076	-3.781	-3.78662	-3.75565	-3.77492	-3.71368							Testing	-3.81432	0.00258223	-0.34676
ChCl-FA (1 : 4)	313.15	70.3	0	0.2244	0.84007	3.95593	2.777	2.56418	1.90317	0.9142	1.12319	0.00076	-5.9915	-6.05556	-6.02354	-6.04028	-6.04684							Testing	-6.00238	0.00321561	0.0459553
ChCl-FA (1 : 4)	313.15	192.2	0	0.2244	0.84007	3.95593	2.777	2.56418	1.90317	0.9142	1.12319	0.00076	-5.0515	-5.0456	-5.03682	-5.04556	-5.10204							Testing	-5.06455	0.00306062	0.0874109
ChCl-FA (1 : 4)	313.15	295.4	0	0.2244	0.84007	3.95593	2.777	2.56418	1.90317	0.9142	1.12319	0.00076	-4.6152	-4.61807	-4.6011	-4.58824	-4.60624							Training	-4.56915	0.00294684	0.206032
ChCl-FA (1 : 4)	313.15	403.5	0	0.2244	0.84007	3.95593	2.777	2.56418	1.90317	0.9142	1.12319	0.00076	-4.32	-4.313	-4.28724	-4.2777	-4.25523							Training	-4.25174	0.0028448	0.128115
ChCl-FA (1 : 4)	313.15	502.8	0	0.2244	0.84007	3.95593	2.777	2.56418	1.90317	0.9142	1.12319	0.00076	-4.1044	-4.08867	-4.06102	-4.06678	-4.02214							Testing	-4.05855	0.00276653	-0.109307
ChCl-FA (1 : 4)	313.15	568.8	0	0.2244	0.84007	3.95593	2.777	2.56418	1.90317	0.9142	1.12319	0.00076	-4.0009	-3.95764	-3.93156	-3.94844	-3.89683							Training	-3.9563	0.00272269	-0.303848
ChCl-FA (1 : 4)	323.15	65.2	0	0.2244	0.84007	3.95593	2.777	2.56418	1.90317	0.9142	1.12319	0.00076	-6.1658	-6.27238	-6.24232	-6.25237	-6.25711							Testing	-6.19637	0.00360459	0.231867
ChCl-FA (1 : 4)	323.15	188.1	0	0.2244	0.84007	3.95593	2.777	2.56418	1.90317	0.9142	1.12319	0.00076	-5.24	-5.21927	-5.21529	-5.23423	-5.29138							Training	-5.2354	0.00343275	0.263981
ChCl-FA (1 : 4)	323.15	296.2	0	0.2244	0.84007	3.95593	2.777	2.56418	1.90317	0.9142	1.12319	0.00076	-4.7677	-4.76687	-4.75516	-4.75157	-4.76964							Testing	-4.71086	0.00330034	0.240245
ChCl-FA (1 : 4)	323.15	399.3	0	0.2244	0.84007	3.95593	2.777	2.56418	1.90317	0.9142	1.12319	0.00076	-4.4654	-4.47392	-4.45492	-4.45085	-4.43242							Testing	-4.40391	0.00319041	0.215499
ChCl-FA (1 : 4)	323.15	494.2	0	0.2244	0.84007	3.95593	2.777	2.56418	1.90317	0.9142	1.12319	0.00076	-4.2475	-4.25589	-4.23627	-4.24192	-4.20392							Testing	-4.21257	0.00310331	0.0528124
ChCl-FA (1 : 4)	323.15	565.8	0	0.2244	0.84007	3.95593	2.777	2.56418	1.90317	0.9142	1.12319	0.00076	-4.1105	-4.11131	-4.0946	-4.10851	-4.06429							Training	-4.09768	0.00304655	-0.09947
ChCl-FA (1 : 4)	333.15	86.8	0	0.2244	0.84007	3.95593	2.777	2.56418	1.90317	0.9142	1.12319	0.00076	-6.1193	-6.16106	-6.15073	-6.17365	-6.20652							Training	-6.15784	0.00413952	0.507304
ChCl-FA (1 : 4)	333.15	220.3	0	0.2244	0.84007	3.95593	2.777	2.56418	1.90317	0.9142	1.12319	0.00076	-5.2214	-5.21097	-5.21566	-5.2319	-5.27755							Testing	-5.20897	0.00394225	0.201885
ChCl-FA (1 : 4)	333.15	326.1	0	0.2244	0.84007	3.95593	2.777	2.56418	1.90317	0.9142	1.12319	0.00076	-4.8283	-4.82477	-4.82104	-4.82035	-4.82597							Training	-4.76259	0.00380492	0.365795
ChCl-FA (1 : 4)	333.15	426.6	0	0.2244	0.84007	3.95593	2.777	2.56418	1.90317	0.9142	1.12319	0.00076	-4.5282	-4.55808	-4.55019	-4.54943	-4.52615							Training	-4.49468	0.00369002	0.354013
ChCl-FA (1 : 4)	333.15	529.6	0	0.2244	0.84007	3.95593	2.777	2.56418	1.90317	0.9142	1.12319	0.00076	-4.3351	-4.33163	-4.32688	-4.33253	-4.29596							Testing	-4.30131	0.003588	0.033967
ChCl-FA (1 : 4)	333.15	585.4	0	0.2244	0.84007	3.95593	2.777	2.56418	1.90317	0.9142	1.12319	0.00076	-4.2267	-4.22225	-4.22153	-4.23013	-4.19216							Training	-4.2137	0.00353938	-0.0729097
ChCl-LEV (1 : 4)	303.15	72.5	0	0	0.54999	5.76513	3.68992	0.95934	1.17221	2.28144	1.13011	0.00076	-5.5468	-5.52882	-5.50442	-5.54662	-5.46502							Training	-5.48098	0.00503856	-0.150129
ChCl-LEV (1 : 4)	303.15	201.2	0	0	0.54999	5.76513	3.68992	0.95934	1.17221	2.28144	1.13011	0.00076	-4.519	-4.4914	-4.47922	-4.57109	-4.51831							Training	-4.52889	0.00500752	-0.0218707
ChCl-LEV (1 : 4)	303.15	305.3	0	0	0.54999	5.76513	3.68992	0.95934	1.17221	2.28144	1.13011	0.00076	-4.0923	-4.06692	-4.07344	-4.12207	-4.05725							Training	-4.0517	0.0050006	0.178649
ChCl-LEV (1 : 4)	303.15	410.6	0	0	0.54999	5.76513	3.68992	0.95934	1.17221	2.28144	1.13011	0.00076	-3.7854	-3.76852	-3.79477	-3.80212	-3.7441							Training	-3.73995	0.00501015	0.148492
ChCl-LEV (1 : 4)	303.15	508.4	0	0	0.54999	5.76513	3.68992	0.95934	1.17221	2.28144	1.13011	0.00076	-3.572	-3.54568	-3.59096	-3.56437	-3.53404							Training	-3.53285	0.00503393	-0.0489052
ChCl-LEV (1 : 4)	303.15	574.9	0	0	0.54999	5.76513	3.68992	0.95934	1.17221	2.28144	1.13011	0.00076	-3.4546	-3.41255	-3.4709	-3.4212	-3.41877							Testing	-3.41604	0.00505829	-0.279679
ChCl-LEV (1 : 4)	313.15	60	0	0	0.54999	5.76513	3.68992	0.95934	1.17221	2.28144	1.13011	0.00076	-5.843	-5.88251	-5.84764	-5.85403	-5.78206							Testing	-5.75317	0.00494189	-0.150009
ChCl-LEV (1 : 4)	313.15	176.9	0	0	0.54999	5.76513	3.68992	0.95934	1.17221	2.28144	1.13011	0.00076	-4.7677	-4.81613	-4.78785	-4.89363	-4.8571							Testing	-4.84201	0.00489646	0.292747
ChCl-LEV (1 : 4)	313.15	282.4	0	0	0.54999	5.76513	3.68992	0.95934	1.17221	2.28144	1.13011	0.00076	-4.3051	-4.33448	-4.32521	-4.39519	-4.34403							Training	-4.31534	0.00487306	0.281852
ChCl-LEV (1 : 4)	313.15	380.1	0	0	0.54999	5.76513	3.68992	0.95934	1.17221	2.28144	1.13011	0.00076	-3.99	-4.03506	-4.04463	-4.07433	-4.02433							Training	-4.00312	0.0048663	0.325633
ChCl-LEV (1 : 4)	313.15	485.1	0	0	0.54999	5.76513	3.68992	0.95934	1.17221	2.28144	1.13011	0.00076	-3.7679	-3.78196	-3.81286	-3.80231	-3.77818							Training	-3.77241	0.004875	0.0971278
ChCl-LEV (1 : 4)	313.15	565.9	0	0	0.54999	5.76513	3.68992	0.95934	1.17221	2.28144	1.13011	0.00076	-3.6009	-3.61495	-3.66268	-3.62074	-3.63055							Testing	-3.6339	0.00489297	-0.122163
ChCl-LEV (1 : 4)	323.15	83	0	0	0.54999	5.76513	3.68992	0.95934	1.17221	2.28144	1.13011	0.00076	-5.7446	-5.78126	-5.73491	-5.78872	-5.74144							Testing	-5.71242	0.00501493	0.1753
ChCl-LEV (1 : 4)	323.15	219.6	0	0	0.54999	5.76513	3.68992	0.95934	1.17221	2.28144	1.13011	0.00076	-4.7795	-4.77877	-4.74879	-4.8568	-4.8115							Testing	-4.77724	0.0049522	0.017178
ChCl-LEV (1 : 4)	323.15	321.1	0	0	0.54999	5.76513	3.68992	0.95934	1.17221	2.28144	1.13011	0.00076	-4.382	-4.3926	-4.38195	-4.45147	-4.3945							Training	-4.36324	0.00492373	0.264243
ChCl-LEV (1 : 4)	323.15	423.5	0	0	0.54999	5.76513	3.68992	0.95934	1.17221	2.28144	1.13011	0.00076	-4.0923	-4.11039	-4.12066	-4.14839	-4.10358							Training	-4.09428	0.00491068	0.214233
ChCl-LEV (1 : 4)	323.15	523.8	0	0	0.54999	5.76513	3.68992	0.95934	1.17221	2.28144	1.13011	0.00076	-3.8873	-3.88419	-3.9161	-3.90251	-3.89299							Training	-3.90829	0.00491315	-0.0209691
ChCl-LEV (1 : 4)	323.15	584.2	0	0	0.54999	5.76513	3.68992	0.95934	1.17221	2.28144	1.13011	0.00076	-3.7766	-3.76342	-3.80852	-3.76843	-3.78841							Testing	-3.8165	0.00492193	-0.224898
ChCl-LEV (1 : 4)	333.15	82.6	0	0	0.54999	5.76513	3.68992	0.95934	1.17221	2.28144	1.13011	0.00076	-6.0323	-5.9709	-5.9204	-5.97177	-5.91618							Testing	-5.87981	0.00528616	0.0159357
ChCl-LEV (1 : 4)	333.15	218.5	0	0	0.54999	5.76513	3.68992	0.95934	1.17221	2.28144	1.13011	0.00076	-4.9337	-4.9695	-4.93487	-5.05784	-4.9958							Training	-4.95685	0.00520731	0.219785
ChCl-LEV (1 : 4)	333.15	326	0	0	0.54999	5.76513	3.68992	0.95934	1.17221	2.28144	1.13011	0.00076	-4.5756	-4.56226	-4.54832	-4.63436	-4.55913							Testing	-4.52963	0.00516458	0.173193
ChCl-LEV (1 : 4)	333.15	426.2	0	0	0.54999	5.76513	3.68992	0.95934	1.17221	2.28144	1.13011	0.00076	-4.2831	-4.28771	-4.29481	-4.33986	-4.27843							Training	-4.27809	0.00514037	0.185709
ChCl-LEV (1 : 4)	333.15	528.5	0	0	0.54999	5.76513	3.68992	0.95934	1.17221	2.28144	1.13011	0.00076	-4.0864	-4.05708	-4.08706	-4.08743	-4.06499							Testing	-4.09859	0.0051312	-0.117764
ChCl-LEV (1 : 4)	333.15	587.4	0	0	0.54999	5.76513	3.68992	0.95934	1.17221	2.28144	1.13011	0.00076	-3.99	-3.93915	-3.98249	-3.95478	-3.96316							Training	-4.01487	0.00513305	-0.278301
ChCl-Phenol (1 : 4)	293.15	108.2	0.03864	0.44244	0.55071	3.54545	2.67016	2.89038	2.45733	0.8214	0.74531	0.00076	-5.4491	-5.54394	-5.49394	-5.51392	-5.56625							Testing	-5.56499	0.0037565	-0.609028
ChCl-Phenol (1 : 4)	293.15	212.1	0.03864	0.44244	0.55071	3.54545	2.67016	2.89038	2.45733	0.8214	0.74531	0.00076	-4.7915	-4.8333	-4.8125	-4.7637	-4.84409							Testing	-4.8519	0.00367064	-0.77864
ChCl-Phenol (1 : 4)	293.15	312.6	0.03864	0.44244	0.55071	3.54545	2.67016	2.89038	2.45733	0.8214	0.74531	0.00076	-4.382	-4.42202	-4.40931	-4.35038	-4.39583							Testing	-4.41413	0.00360302	-0.536599
ChCl-Phenol (1 : 4)	293.15	401.6	0.03864	0.44244	0.55071	3.54545	2.67016	2.89038	2.45733	0.8214	0.74531	0.00076	-4.1227	-4.14787	-4.14228	-4.10989	-4.12285							Testing	-4.16503	0.00355579	-0.561803
ChCl-Phenol (1 : 4)	293.15	509.2	0.03864	0.44244	0.55071	3.54545	2.67016	2.89038	2.45733	0.8214	0.74531	0.00076	-3.849	-3.86974	-3.87844	-3.89824	-3.88679							Testing	-3.95925	0.00351457	-0.68451
ChCl-Phenol (1 : 4)	303.15	115	0.03864	0.44244	0.55071	3.54545	2.67016	2.89038	2.45733	0.8214	0.74531	0.00076	-5.655	-5.62827	-5.5902	-5.59488	-5.63945							Training	-5.61558	0.00353709	-0.682493
ChCl-Phenol (1 : 4)	303.15	220	0.03864	0.44244	0.55071	3.54545	2.67016	2.89038	2.45733	0.8214	0.74531	0.00076	-5.0056	-4.94151	-4.93066	-4.87672	-4.93884							Testing	-4.91782	0.0034389	-0.897205
ChCl-Phenol (1 : 4)	303.15	323.9	0.03864	0.44244	0.55071	3.54545	2.67016	2.89038	2.45733	0.8214	0.74531	0.00076	-4.5854	-4.53022	-4.52818	-4.46907	-4.4953							Testing	-4.4861	0.00335803	-0.654287
ChCl-Phenol (1 : 4)	303.15	420.9	0.03864	0.44244	0.55071	3.54545	2.67016	2.89038	2.45733	0.8214	0.74531	0.00076	-4.2977	-4.23962	-4.24745	-4.21853	-4.21385							Training	-4.23179	0.00329716	-0.646715
ChCl-Phenol (1 : 4)	303.15	523.3	0.03864	0.44244	0.55071	3.54545	2.67016	2.89038	2.45733	0.8214	0.74531	0.00076	-4.0628	-3.97951	-4.00379	-4.0219	-3.99968							Training	-4.04578	0.00324822	-0.826295
ChCl-Phenol (1 : 4)	313.15	117.1	0.03864	0.44244	0.55071	3.54545	2.67016	2.89038	2.45733	0.8214	0.74531	0.00076	-5.7446	-5.75739	-5.7263	-5.72282	-5.75936							Testing	-5.71057	0.00350877	-0.449031
ChCl-Phenol (1 : 4)	313.15	214.2	0.03864	0.44244	0.55071	3.54545	2.67016	2.89038	2.45733	0.8214	0.74531	0.00076	-5.0832	-5.1179	-5.1126	-5.06043	-5.11245							Training	-5.06325	0.00340606	-0.57838
ChCl-Phenol (1 : 4)	313.15	320.4	0.03864	0.44244	0.55071	3.54545	2.67016	2.89038	2.45733	0.8214	0.74531	0.00076	-4.646	-4.68932	-4.69418	-4.63443	-4.65269							Testing	-4.61383	0.00330993	-0.336819
ChCl-Phenol (1 : 4)	313.15	415.8	0.03864	0.44244	0.55071	3.54545	2.67016	2.89038	2.45733	0.8214	0.74531	0.00076	-4.382	-4.39986	-4.4155	-4.38158	-4.37199							Testing	-4.35979	0.00323801	-0.396163
ChCl-Phenol (1 : 4)	313.15	504.5	0.03864	0.44244	0.55071	3.54545	2.67016	2.89038	2.45733	0.8214	0.74531	0.00076	-4.1541	-4.16948	-4.20037	-4.20272	-4.17929							Training	-4.19282	0.0031834	-0.465243
ChCl-Phenol (1 : 4)	323.15	118.2	0.03864	0.44244	0.55071	3.54545	2.67016	2.89038	2.45733	0.8214	0.74531	0.00076	-5.9145	-5.89647	-5.86943	-5.8616	-5.89413							Training	-5.81411	0.00366856	-0.332226
ChCl-Phenol (1 : 4)	323.15	221.4	0.03864	0.44244	0.55071	3.54545	2.67016	2.89038	2.45733	0.8214	0.74531	0.00076	-5.2785	-5.23182	-5.23127	-5.17945	-5.224							Testing	-5.14043	0.00354768	-0.67302
ChCl-Phenol (1 : 4)	323.15	325.1	0.03864	0.44244	0.55071	3.54545	2.67016	2.89038	2.45733	0.8214	0.74531	0.00076	-4.8409	-4.82204	-4.83193	-4.77493	-4.78833							Testing	-4.71564	0.00344231	-0.388361
ChCl-Phenol (1 : 4)	323.15	418.4	0.03864	0.44244	0.55071	3.54545	2.67016	2.89038	2.45733	0.8214	0.74531	0.00076	-4.519	-4.54005	-4.56195	-4.52791	-4.51786							Testing	-4.47153	0.0033613	-0.298715
ChCl-Phenol (1 : 4)	323.15	529.1	0.03864	0.44244	0.55071	3.54545	2.67016	2.89038	2.45733	0.8214	0.74531	0.00076	-4.3275	-4.25575	-4.29957	-4.30647	-4.28546							Training	-4.27015	0.00328214	-0.609815
ChCl-TEG (1 : 4)	293.15	119	0	0	0.35335	5.42785	6.36208	1.49278	1.20781	1.49892	1.60659	0.01584	-5.116	-5.1089	-5.03896	-5.12462	-5.16881							Testing	-4.93896	0.00643844	-0.533406
ChCl-TEG (1 : 4)	293.15	215	0	0	0.35335	5.42785	6.36208	1.49278	1.20781	1.49892	1.60659	0.01584	-4.5099	-4.46476	-4.40875	-4.47332	-4.54389							Training	-4.36476	0.00645687	-0.660382
ChCl-TEG (1 : 4)	293.15	322.1	0	0	0.35335	5.42785	6.36208	1.49278	1.20781	1.49892	1.60659	0.01584	-4.0745	-4.04751	-4.02167	-4.04364	-4.06342							Testing	-3.94288	0.00649376	-0.427717
ChCl-TEG (1 : 4)	293.15	404.3	0	0	0.35335	5.42785	6.36208	1.49278	1.20781	1.49892	1.60659	0.01584	-3.8213	-3.81489	-3.81954	-3.82038	-3.78963							Testing	-3.71466	0.00653375	-0.419211
ChCl-TEG (1 : 4)	293.15	513.5	0	0	0.35335	5.42785	6.36208	1.49278	1.20781	1.49892	1.60659	0.01584	-3.5756	-3.56019	-3.61287	-3.59608	-3.50292							Testing	-3.47898	0.00660257	-0.618081
ChCl-TEG (1 : 4)	303.15	109.3	0	0	0.35335	5.42785	6.36208	1.49278	1.20781	1.49892	1.60659	0.01584	-5.3185	-5.37726	-5.319	-5.36547	-5.40562							Testing	-5.19174	0.00622803	-0.332203
ChCl-TEG (1 : 4)	303.15	211.5	0	0	0.35335	5.42785	6.36208	1.49278	1.20781	1.49892	1.60659	0.01584	-4.6052	-4.65876	-4.61342	-4.65149	-4.72915							Training	-4.5675	0.00623439	-0.418604
ChCl-TEG (1 : 4)	303.15	310.4	0	0	0.35335	5.42785	6.36208	1.49278	1.20781	1.49892	1.60659	0.01584	-4.2131	-4.26128	-4.24299	-4.24123	-4.27851							Testing	-4.17005	0.00625547	-0.233353
ChCl-TEG (1 : 4)	303.15	410.5	0	0	0.35335	5.42785	6.36208	1.49278	1.20781	1.49892	1.60659	0.01584	-3.912	-3.97415	-3.99319	-3.96207	-3.94445							Training	-3.89263	0.00629176	-0.207923
ChCl-TEG (1 : 4)	303.15	513	0	0	0.35335	5.42785	6.36208	1.49278	1.20781	1.49892	1.60659	0.01584	-3.701	-3.73474	-3.79993	-3.74747	-3.67883							Training	-3.67725	0.00634451	-0.444729
ChCl-TEG (1 : 4)	313.15	119.6	0	0	0.35335	5.42785	6.36208	1.49278	1.20781	1.49892	1.60659	0.01584	-5.4727	-5.45851	-5.41304	-5.4342	-5.49042							Testing	-5.32196	0.00620477	-0.369733
ChCl-TEG (1 : 4)	313.15	219.3	0	0	0.35335	5.42785	6.36208	1.49278	1.20781	1.49892	1.60659	0.01584	-4.8159	-4.79957	-4.76815	-4.78015	-4.86115							Testing	-4.73699	0.00620038	-0.556299
ChCl-TEG (1 : 4)	313.15	315.2	0	0	0.35335	5.42785	6.36208	1.49278	1.20781	1.49892	1.60659	0.01584	-4.3901	-4.42437	-4.41977	-4.39398	-4.4382							Training	-4.36313	0.00621024	-0.212345
ChCl-TEG (1 : 4)	313.15	415	0	0	0.35335	5.42785	6.36208	1.49278	1.20781	1.49892	1.60659	0.01584	-4.0864	-4.14039	-4.1738	-4.11649	-4.11269							Training	-4.09246	0.00623515	-0.210591
ChCl-TEG (1 : 4)	313.15	519	0	0	0.35335	5.42785	6.36208	1.49278	1.20781	1.49892	1.60659	0.01584	-3.9021	-3.8979	-3.97929	-3.89574	-3.84856							Testing	-3.87866	0.00627703	-0.546992
ChCl-TEG (1 : 4)	323.15	118.8	0	0	0.35335	5.42785	6.36208	1.49278	1.20781	1.49892	1.60659	0.01584	-5.7138	-5.64712	-5.61497	-5.60882	-5.66973							Testing	-5.54936	0.00636913	-0.414064
ChCl-TEG (1 : 4)	323.15	221.4	0	0	0.35335	5.42785	6.36208	1.49278	1.20781	1.49892	1.60659	0.01584	-5.0207	-4.97122	-4.95303	-4.94566	-5.03163							Testing	-4.94815	0.00635241	-0.606507
ChCl-TEG (1 : 4)	323.15	318.6	0	0	0.35335	5.42785	6.36208	1.49278	1.20781	1.49892	1.60659	0.01584	-4.646	-4.59471	-4.60383	-4.5595	-4.61209							Training	-4.57256	0.00635116	-0.399817
ChCl-TEG (1 : 4)	323.15	420.2	0	0	0.35335	5.42785	6.36208	1.49278	1.20781	1.49892	1.60659	0.01584	-4.3125	-4.30747	-4.356	-4.2777	-4.28854							Training	-4.3001	0.006365	-0.340523
ChCl-TEG (1 : 4)	323.15	520.3	0	0	0.35335	5.42785	6.36208	1.49278	1.20781	1.49892	1.60659	0.01584	-4.0923	-4.07377	-4.16945	-4.06182	-4.03917							Testing	-4.09579	0.0063938	-0.563715
MTPPBr-1,2-PRO (1 : 4)	298.15	220	0.00016	0.29184	0.77855	3.31126	4.81959	3.6363	0.74608	1.01368	1.47756	0.0026	-5.8421	-5.61191	-5.51781	-5.35327	-5.27037							Training	-5.44482	0.00913374	-2.91869
MTPPBr-1,2-PRO (1 : 4)	298.15	528	0.00016	0.29184	0.77855	3.31126	4.81959	3.6363	0.74608	1.01368	1.47756	0.0026	-4.3889	-4.49604	-4.44852	-4.41051	-4.25153							Training	-4.39706	0.00871366	-1.69341
MTPPBr-1,2-PRO (1 : 4)	298.15	861	0.00016	0.29184	0.77855	3.31126	4.81959	3.6363	0.74608	1.01368	1.47756	0.0026	-3.5307	-3.72941	-3.76551	-3.84234	-3.7758							Testing	-3.80958	0.0084197	-1.77618
MTPPBr-1,2-PRO (1 : 4)	298.15	1120	0.00016	0.29184	0.77855	3.31126	4.81959	3.6363	0.74608	1.01368	1.47756	0.0026	-3.2783	-3.31507	-3.40194	-3.50019	-3.51086							Testing	-3.47002	0.00830613	-1.39361
MTPPBr-1,2-PRO (1 : 4)	298.15	1547	0.00016	0.29184	0.77855	3.31126	4.81959	3.6363	0.74608	1.01368	1.47756	0.0026	-3.0317	-2.90178	-2.99394	-3.07096	-3.13506							Testing	-3.07922	0.00833876	-1.15584
MTPPBr-1,2-PRO (1 : 4)	298.15	1834	0.00016	0.29184	0.77855	3.31126	4.81959	3.6363	0.74608	1.01368	1.47756	0.0026	-2.8045	-2.76938	-2.80211	-2.85977	-2.90728							Testing	-2.8976	0.00851449	-0.853578
MTPPBr-1,2-PRO (1 : 4)	298.15	2026	0.00016	0.29184	0.77855	3.31126	4.81959	3.6363	0.74608	1.01368	1.47756	0.0026	-2.6923	-2.73006	-2.69687	-2.74656	-2.76409							Training	-2.7982	0.00870108	-0.721849
MTPPBr-AC (1 : 4)	298.15	173	0.05184	0.40972	0.43891	3.48346	3.63595	2.77302	0.93716	1.57468	0.8846	0.00044	-4.7505	-4.70694	-4.67241	-4.62896	-4.5188							Testing	-4.68591	0.0082266	-0.144874
MTPPBr-AC (1 : 4)	298.15	380	0.05184	0.40972	0.43891	3.48346	3.63595	2.77302	0.93716	1.57468	0.8846	0.00044	-3.6961	-3.80284	-3.76898	-3.70135	-3.49716							Training	-3.67211	0.00790212	0.576678
MTPPBr-AC (1 : 4)	298.15	652	0.05184	0.40972	0.43891	3.48346	3.63595	2.77302	0.93716	1.57468	0.8846	0.00044	-3.1117	-3.08856	-3.06757	-3.06829	-2.91565							Training	-3.0166	0.00757353	0.00615044
MTPPBr-AC (1 : 4)	298.15	938	0.05184	0.40972	0.43891	3.48346	3.63595	2.77302	0.93716	1.57468	0.8846	0.00044	-2.5485	-2.52025	-2.5523	-2.57857	-2.57413							Training	-2.56046	0.00734781	0.025277
MTPPBr-AC (1 : 4)	298.15	1134	0.05184	0.40972	0.43891	3.48346	3.63595	2.77302	0.93716	1.57468	0.8846	0.00044	-2.2303	-2.21106	-2.25542	-2.29527	-2.38866							Training	-2.31673	0.00726403	0.621324
MTPPBr-AC (1 : 4)	298.15	1524	0.05184	0.40972	0.43891	3.48346	3.63595	2.77302	0.93716	1.57468	0.8846	0.00044	-1.7501	-1.75376	-1.74062	-1.8325	-2.06581							Testing	-1.94927	0.00726884	1.38139
MTPPBr-AC (1 : 4)	298.15	1843	0.05184	0.40972	0.43891	3.48346	3.63595	2.77302	0.93716	1.57468	0.8846	0.00044	-1.5493	-1.49565	-1.49738	-1.53801	-1.83239							Training	-1.72946	0.00744253	1.66606
MTPPBr-AC (1 : 4)	298.15	2014	0.05184	0.40972	0.43891	3.48346	3.63595	2.77302	0.93716	1.57468	0.8846	0.00044	-1.3269	-1.38654	-1.40599	-1.40562	-1.71768							Testing	-1.63279	0.00759852	1.97927
TMACl-AC (1 : 4)	298.15	294	0.05184	0.40972	0.46518	2.74803	2.96341	0.7277	0.87524	1.48444	0.85962	0.0064	-4.7884	-4.72076	-4.84831	-4.73352	-4.68515							Training	-4.72116	0.00822451	-1.14877
TMACl-AC (1 : 4)	298.15	519	0.05184	0.40972	0.46518	2.74803	2.96341	0.7277	0.87524	1.48444	0.85962	0.0064	-3.8977	-4.17934	-4.25143	-4.17767	-4.09204							Training	-4.15606	0.00795353	-0.657733
TMACl-AC (1 : 4)	298.15	731	0.05184	0.40972	0.46518	2.74803	2.96341	0.7277	0.87524	1.48444	0.85962	0.0064	-3.8153	-3.85578	-3.87867	-3.87925	-3.81489							Testing	-3.84499	0.00776773	-1.98153
TMACl-AC (1 : 4)	298.15	1015	0.05184	0.40972	0.46518	2.74803	2.96341	0.7277	0.87524	1.48444	0.85962	0.0064	-3.646	-3.55255	-3.51946	-3.58224	-3.57845							Training	-3.54452	0.00762456	-2.48295
TMACl-AC (1 : 4)	298.15	1312	0.05184	0.40972	0.46518	2.74803	2.96341	0.7277	0.87524	1.48444	0.85962	0.0064	-3.4722	-3.33691	-3.25578	-3.33729	-3.38598							Training	-3.30026	0.00760435	-2.30887
TMACl-AC (1 : 4)	298.15	1741	0.05184	0.40972	0.46518	2.74803	2.96341	0.7277	0.87524	1.48444	0.85962	0.0064	-3.1161	-3.13654	-2.99991	-3.06286	-3.14732							Testing	-3.00119	0.00780892	-1.80946
TPACl-EA (1 : 4)	298.15	481	0	0	0.6831	2.73149	5.65802	2.03657	0.50858	0.7109	1.38066	0.07876	-3.4884	-3.39212	-3.49292	-3.16515	-2.75479							Testing	-3.18212	0.00690293	0.540308
TPACl-EA (1 : 4)	298.15	784	0	0	0.6831	2.73149	5.65802	2.03657	0.50858	0.7109	1.38066	0.07876	-2.8829	-2.87421	-2.94217	-2.79685	-2.44062							Training	-2.74946	0.00680759	-0.155371
TPACl-EA (1 : 4)	298.15	1057	0	0	0.6831	2.73149	5.65802	2.03657	0.50858	0.7109	1.38066	0.07876	-2.5235	-2.57524	-2.61236	-2.57424	-2.27162							Testing	-2.49374	0.00683971	0.171696
TPACl-EA (1 : 4)	298.15	1317	0	0	0.6831	2.73149	5.65802	2.03657	0.50858	0.7109	1.38066	0.07876	-2.3364	-2.38887	-2.39073	-2.41086	-2.13856							Testing	-2.33192	0.00697431	0.402116
TPACl-EA (1 : 4)	298.15	1700	0	0	0.6831	2.73149	5.65802	2.03657	0.50858	0.7109	1.38066	0.07876	-2.2289	-2.22319	-2.17087	-2.23108	-1.96216							Training	-2.19548	0.00735742	0.395546
TPACl-EA (1 : 4)	298.15	2009	0	0	0.6831	2.73149	5.65802	2.03657	0.50858	0.7109	1.38066	0.07876	-2.142	-2.14778	-2.05271	-2.12406	-1.83149							Training	-2.13689	0.00782699	0.354586
[MTPP]Br-GLY (1 : 4)	298.15	161	0.00328	0.28396	0.84755	4.50614	3.96651	3.0129	0.92524	1.33536	1.60928	0.00044	-6.642	-6.53839	-6.57525	-6.50352	-6.23403							Training	-6.48105	0.00736125	-3.82755
[MTPP]Br-GLY (1 : 4)	298.15	443	0.00328	0.28396	0.84755	4.50614	3.96651	3.0129	0.92524	1.33536	1.60928	0.00044	-5.3462	-5.28622	-5.32747	-5.26373	-4.9299							Training	-5.18857	0.00694254	-3.24233
[MTPP]Br-GLY (1 : 4)	298.15	875	0.00328	0.28396	0.84755	4.50614	3.96651	3.0129	0.92524	1.33536	1.60928	0.00044	-4.1444	-4.25446	-4.20585	-4.26643	-4.17446							Testing	-4.28712	0.00653261	-3.03693
[MTPP]Br-GLY (1 : 4)	298.15	1225	0.00328	0.28396	0.84755	4.50614	3.96651	3.0129	0.92524	1.33536	1.60928	0.00044	-3.5538	-3.7328	-3.69476	-3.72141	-3.77301							Training	-3.77024	0.00640591	-1.94377
[MTPP]Br-GLY (1 : 4)	298.15	1696	0.00328	0.28396	0.84755	4.50614	3.96651	3.0129	0.92524	1.33536	1.60928	0.00044	-3.3218	-3.30315	-3.28821	-3.25219	-3.30294							Testing	-3.32602	0.00652564	-1.77203
[MTPP]Br-GLY (1 : 4)	298.15	2026	0.00328	0.28396	0.84755	4.50614	3.96651	3.0129	0.92524	1.33536	1.60928	0.00044	-3.2126	-3.10548	-3.0943	-3.03394	-3.00417							Training	-3.13484	0.00680792	-1.77583
[Ch]Cl-1,4-butanediol (1 : 4)	293.15	109.5	0.00528	0.30216	0.63011	2.59549	5.66528	1.68634	0.75477	0.88912	1.48967	0.0622	-5.7764	-5.75338	-5.77732	-5.82541	-5.73754							Testing	-5.70815	0.00507981	-1.31223
[Ch]Cl-1,4-butanediol (1 : 4)	293.15	214.5	0.00528	0.30216	0.63011	2.59549	5.66528	1.68634	0.75477	0.88912	1.48967	0.0622	-5.0832	-5.04256	-5.02472	-5.04524	-5.05742							Training	-5.05954	0.00502892	-1.36838
[Ch]Cl-1,4-butanediol (1 : 4)	293.15	316.4	0.00528	0.30216	0.63011	2.59549	5.66528	1.68634	0.75477	0.88912	1.48967	0.0622	-4.6777	-4.64201	-4.61137	-4.61551	-4.62462							Training	-4.63909	0.00499535	-1.141
[Ch]Cl-1,4-butanediol (1 : 4)	293.15	411.6	0.00528	0.30216	0.63011	2.59549	5.66528	1.68634	0.75477	0.88912	1.48967	0.0622	-4.3982	-4.37059	-4.33777	-4.35405	-4.34074							Testing	-4.35723	0.00497807	-1.17655
[Ch]Cl-1,4-butanediol (1 : 4)	293.15	513.4	0.00528	0.30216	0.63011	2.59549	5.66528	1.68634	0.75477	0.88912	1.48967	0.0622	-4.1734	-4.13343	-4.10371	-4.14925	-4.11476							Testing	-4.12022	0.00497465	-1.37179
[Ch]Cl-1,4-butanediol (1 : 4)	303.15	105.8	0.00528	0.30216	0.63011	2.59549	5.66528	1.68634	0.75477	0.88912	1.48967	0.0622	-5.9145	-5.94971	-5.98322	-6.0068	-5.92295							Training	-5.91375	0.00479722	-1.05166
[Ch]Cl-1,4-butanediol (1 : 4)	303.15	205.8	0.00528	0.30216	0.63011	2.59549	5.66528	1.68634	0.75477	0.88912	1.48967	0.0622	-5.2591	-5.2471	-5.23822	-5.24681	-5.26271							Training	-5.27781	0.00473583	-1.27985
[Ch]Cl-1,4-butanediol (1 : 4)	303.15	304.7	0.00528	0.30216	0.63011	2.59549	5.66528	1.68634	0.75477	0.88912	1.48967	0.0622	-4.8036	-4.84105	-4.81859	-4.81	-4.82733							Testing	-4.85014	0.00468988	-0.930738
[Ch]Cl-1,4-butanediol (1 : 4)	303.15	403.3	0.00528	0.30216	0.63011	2.59549	5.66528	1.68634	0.75477	0.88912	1.48967	0.0622	-4.5099	-4.55141	-4.52665	-4.5264	-4.52276							Testing	-4.54541	0.00465869	-0.943755
[Ch]Cl-1,4-butanediol (1 : 4)	303.15	503.6	0.00528	0.30216	0.63011	2.59549	5.66528	1.68634	0.75477	0.88912	1.48967	0.0622	-4.3051	-4.31271	-4.29168	-4.31587	-4.293							Training	-4.30392	0.00464193	-1.16167
[Ch]Cl-1,4-butanediol (1 : 4)	313.15	119.5	0.00528	0.30216	0.63011	2.59549	5.66528	1.68634	0.75477	0.88912	1.48967	0.0622	-5.9522	-5.98462	-6.01996	-6.02467	-5.97291							Testing	-5.97799	0.00468895	-0.89405
[Ch]Cl-1,4-butanediol (1 : 4)	313.15	223.2	0.00528	0.30216	0.63011	2.59549	5.66528	1.68634	0.75477	0.88912	1.48967	0.0622	-5.3185	-5.32326	-5.32167	-5.31216	-5.33564							Training	-5.35307	0.00461528	-1.1032
[Ch]Cl-1,4-butanediol (1 : 4)	313.15	312.5	0.00528	0.30216	0.63011	2.59549	5.66528	1.68634	0.75477	0.88912	1.48967	0.0622	-4.9477	-4.97578	-4.96409	-4.94273	-4.9626							Training	-4.98194	0.00456478	-0.867433
[Ch]Cl-1,4-butanediol (1 : 4)	313.15	410	0.00528	0.30216	0.63011	2.59549	5.66528	1.68634	0.75477	0.88912	1.48967	0.0622	-4.646	-4.69368	-4.681	-4.66733	-4.66816							Testing	-4.68378	0.00452331	-0.873071
[Ch]Cl-1,4-butanediol (1 : 4)	313.15	507.2	0.00528	0.30216	0.63011	2.59549	5.66528	1.68634	0.75477	0.88912	1.48967	0.0622	-4.4312	-4.46316	-4.45529	-4.46214	-4.44718							Testing	-4.44955	0.00449617	-1.05913
[Ch]Cl-1,4-butanediol (1 : 4)	323.15	123	0.00528	0.30216	0.63011	2.59549	5.66528	1.68634	0.75477	0.88912	1.48967	0.0622	-6.1193	-6.11555	-6.16344	-6.14968	-6.1065							Training	-6.10591	0.00477416	-0.822459
[Ch]Cl-1,4-butanediol (1 : 4)	323.15	221.6	0.00528	0.30216	0.63011	2.59549	5.66528	1.68634	0.75477	0.88912	1.48967	0.0622	-5.5468	-5.49209	-5.50543	-5.48419	-5.50747							Training	-5.51102	0.00469244	-1.18953
[Ch]Cl-1,4-butanediol (1 : 4)	323.15	332.6	0.00528	0.30216	0.63011	2.59549	5.66528	1.68634	0.75477	0.88912	1.48967	0.0622	-5.0832	-5.0723	-5.07477	-5.0417	-5.05924							Testing	-5.06004	0.00461791	-0.908556
[Ch]Cl-1,4-butanediol (1 : 4)	323.15	425.3	0.00528	0.30216	0.63011	2.59549	5.66528	1.68634	0.75477	0.88912	1.48967	0.0622	-4.8159	-4.81439	-4.81792	-4.79264	-4.79425							Training	-4.78826	0.00456983	-0.923445
[Ch]Cl-1,4-butanediol (1 : 4)	323.15	519	0.00528	0.30216	0.63011	2.59549	5.66528	1.68634	0.75477	0.88912	1.48967	0.0622	-4.5854	-4.5959	-4.60557	-4.59715	-4.58723							Testing	-4.56688	0.00453435	-1.06629
[Ch]Cl-2,3-butanediol (1 : 4)	293.15	107.1	0	0.20392	0.87751	2.82809	4.87164	2.20878	0.72513	1.09484	1.44671	0.007	-5.5728	-5.59898	-5.59751	-5.56714	-5.51742							Training	-5.64163	0.00425001	-0.674871
[Ch]Cl-2,3-butanediol (1 : 4)	293.15	207.2	0	0.20392	0.87751	2.82809	4.87164	2.20878	0.72513	1.09484	1.44671	0.007	-4.9477	-4.92132	-4.91165	-4.87422	-4.84947							Training	-4.98602	0.00413203	-0.892709
[Ch]Cl-2,3-butanediol (1 : 4)	293.15	309.7	0	0.20392	0.87751	2.82809	4.87164	2.20878	0.72513	1.09484	1.44671	0.007	-4.519	-4.5152	-4.5004	-4.45552	-4.40645							Testing	-4.54346	0.00402681	-0.638646
[Ch]Cl-2,3-butanediol (1 : 4)	293.15	403	0	0.20392	0.87751	2.82809	4.87164	2.20878	0.72513	1.09484	1.44671	0.007	-4.2131	-4.24973	-4.23158	-4.1999	-4.13124							Training	-4.26759	0.00394474	-0.561172
[Ch]Cl-2,3-butanediol (1 : 4)	293.15	508.5	0	0.20392	0.87751	2.82809	4.87164	2.20878	0.72513	1.09484	1.44671	0.007	-3.9739	-4.00727	-3.98714	-3.98334	-3.90876							Training	-4.03595	0.00386769	-0.752835
[Ch]Cl-2,3-butanediol (1 : 4)	303.15	117.6	0	0.20392	0.87751	2.82809	4.87164	2.20878	0.72513	1.09484	1.44671	0.007	-5.655	-5.61891	-5.62114	-5.60842	-5.58837							Training	-5.65125	0.00424422	-0.546492
[Ch]Cl-2,3-butanediol (1 : 4)	303.15	218.7	0	0.20392	0.87751	2.82809	4.87164	2.20878	0.72513	1.09484	1.44671	0.007	-4.9908	-4.97907	-4.97391	-4.95701	-4.95255							Training	-5.01791	0.00411461	-0.635171
[Ch]Cl-2,3-butanediol (1 : 4)	303.15	320.1	0	0.20392	0.87751	2.82809	4.87164	2.20878	0.72513	1.09484	1.44671	0.007	-4.5854	-4.59374	-4.58405	-4.56278	-4.53746							Training	-4.59947	0.00400003	-0.40444
[Ch]Cl-2,3-butanediol (1 : 4)	303.15	409.2	0	0.20392	0.87751	2.82809	4.87164	2.20878	0.72513	1.09484	1.44671	0.007	-4.3125	-4.3442	-4.33206	-4.32262	-4.2847							Testing	-4.34345	0.00391209	-0.426815
[Ch]Cl-2,3-butanediol (1 : 4)	303.15	511.2	0	0.20392	0.87751	2.82809	4.87164	2.20878	0.72513	1.09484	1.44671	0.007	-4.0923	-4.10976	-4.0967	-4.11065	-4.07413							Testing	-4.12195	0.00382605	-0.63413
[Ch]Cl-2,3-butanediol (1 : 4)	313.15	110.9	0	0.20392	0.87751	2.82809	4.87164	2.20878	0.72513	1.09484	1.44671	0.007	-5.8091	-5.79378	-5.8016	-5.80445	-5.80845							Training	-5.81563	0.0044488	-0.280481
[Ch]Cl-2,3-butanediol (1 : 4)	313.15	217.2	0	0.20392	0.87751	2.82809	4.87164	2.20878	0.72513	1.09484	1.44671	0.007	-5.0995	-5.10118	-5.1009	-5.10935	-5.1348							Testing	-5.13789	0.00429913	-0.466737
[Ch]Cl-2,3-butanediol (1 : 4)	313.15	318	0	0.20392	0.87751	2.82809	4.87164	2.20878	0.72513	1.09484	1.44671	0.007	-4.7444	-4.71407	-4.70966	-4.71397	-4.72366							Training	-4.71789	0.00417288	-0.323324
[Ch]Cl-2,3-butanediol (1 : 4)	313.15	414.9	0	0.20392	0.87751	2.82809	4.87164	2.20878	0.72513	1.09484	1.44671	0.007	-4.4397	-4.44196	-4.43563	-4.45056	-4.45295							Testing	-4.43962	0.00406589	-0.328464
[Ch]Cl-2,3-butanediol (1 : 4)	313.15	511	0	0.20392	0.87751	2.82809	4.87164	2.20878	0.72513	1.09484	1.44671	0.007	-4.2336	-4.22042	-4.21415	-4.24745	-4.25809							Training	-4.23139	0.0039737	-0.500847
[Ch]Cl-2,3-butanediol (1 : 4)	323.15	116.4	0	0.20392	0.87751	2.82809	4.87164	2.20878	0.72513	1.09484	1.44671	0.007	-5.8091	-5.86282	-5.87452	-5.90105	-5.94522							Training	-5.90738	0.00482279	0.131682
[Ch]Cl-2,3-butanediol (1 : 4)	323.15	214.1	0	0.20392	0.87751	2.82809	4.87164	2.20878	0.72513	1.09484	1.44671	0.007	-5.2591	-5.23307	-5.23756	-5.27431	-5.33784							Training	-5.28627	0.0046737	-0.315321
[Ch]Cl-2,3-butanediol (1 : 4)	323.15	315.9	0	0.20392	0.87751	2.82809	4.87164	2.20878	0.72513	1.09484	1.44671	0.007	-4.8536	-4.83658	-4.83725	-4.87008	-4.92303							Training	-4.85547	0.00453359	-0.12446
[Ch]Cl-2,3-butanediol (1 : 4)	323.15	425.7	0	0.20392	0.87751	2.82809	4.87164	2.20878	0.72513	1.09484	1.44671	0.007	-4.5469	-4.5291	-4.52849	-4.57094	-4.6236							Training	-4.54167	0.00439992	-0.187389
[Ch]Cl-2,3-butanediol (1 : 4)	323.15	512.5	0	0.20392	0.87751	2.82809	4.87164	2.20878	0.72513	1.09484	1.44671	0.007	-4.3428	-4.32956	-4.32992	-4.38562	-4.45258							Testing	-4.35491	0.00430705	-0.357317
[Ch]Cl-1,2-propanediol (1 : 4)	293.15	104.4	0.00016	0.29184	0.92235	2.83901	3.94004	1.58806	0.80005	1.11172	1.45643	0.00292	-5.7764	-5.84928	-5.80433	-5.84657	-5.98946							Testing	-5.7652	0.00244051	-0.919306
[Ch]Cl-1,2-propanediol (1 : 4)	293.15	209.6	0.00016	0.29184	0.92235	2.83901	3.94004	1.58806	0.80005	1.11172	1.45643	0.00292	-5.0515	-5.09346	-5.05942	-5.07843	-5.2448							Training	-5.06606	0.00229462	-0.931301
[Ch]Cl-1,2-propanediol (1 : 4)	293.15	307.6	0.00016	0.29184	0.92235	2.83901	3.94004	1.58806	0.80005	1.11172	1.45643	0.00292	-4.667	-4.6919	-4.66456	-4.66977	-4.79422							Training	-4.63259	0.00217367	-0.725583
[Ch]Cl-1,2-propanediol (1 : 4)	293.15	401.1	0.00016	0.29184	0.92235	2.83901	3.94004	1.58806	0.80005	1.11172	1.45643	0.00292	-4.3662	-4.4184	-4.39633	-4.41427	-4.49567							Testing	-4.34187	0.00207171	-0.707944
[Ch]Cl-1,2-propanediol (1 : 4)	293.15	501.5	0.00016	0.29184	0.92235	2.83901	3.94004	1.58806	0.80005	1.11172	1.45643	0.00292	-4.1044	-4.18213	-4.16621	-4.21435	-4.26218							Training	-4.10454	0.00197684	-0.787088
[Ch]Cl-1,2-propanediol (1 : 4)	303.15	117.2	0.00016	0.29184	0.92235	2.83901	3.94004	1.58806	0.80005	1.11172	1.45643	0.00292	-5.9145	-5.93011	-5.89447	-5.92523	-6.03044							Testing	-5.88124	0.00254844	-0.963354
[Ch]Cl-1,2-propanediol (1 : 4)	303.15	220.1	0.00016	0.29184	0.92235	2.83901	3.94004	1.58806	0.80005	1.11172	1.45643	0.00292	-5.2983	-5.24459	-5.21993	-5.23199	-5.34352							Training	-5.23151	0.00239521	-1.14822
[Ch]Cl-1,2-propanediol (1 : 4)	303.15	321.7	0.00016	0.29184	0.92235	2.83901	3.94004	1.58806	0.80005	1.11172	1.45643	0.00292	-4.8929	-4.84753	-4.83041	-4.83296	-4.90009							Training	-4.80624	0.00225951	-0.918922
[Ch]Cl-1,2-propanediol (1 : 4)	303.15	415.6	0.00016	0.29184	0.92235	2.83901	3.94004	1.58806	0.80005	1.11172	1.45643	0.00292	-4.5952	-4.58127	-4.5706	-4.58713	-4.61469							Training	-4.53008	0.00214788	-0.889007
[Ch]Cl-1,2-propanediol (1 : 4)	303.15	517.5	0.00016	0.29184	0.92235	2.83901	3.94004	1.58806	0.80005	1.11172	1.45643	0.00292	-4.3505	-4.34579	-4.34289	-4.38815	-4.38667							Training	-4.30036	0.00204171	-1.04183
[Ch]Cl-1,2-propanediol (1 : 4)	313.15	121.6	0.00016	0.29184	0.92235	2.83901	3.94004	1.58806	0.80005	1.11172	1.45643	0.00292	-6.1658	-6.09603	-6.06544	-6.08371	-6.14871							Training	-6.07472	0.00285496	-1.10833
[Ch]Cl-1,2-propanediol (1 : 4)	313.15	225.2	0.00016	0.29184	0.92235	2.83901	3.94004	1.58806	0.80005	1.11172	1.45643	0.00292	-5.4491	-5.42503	-5.40587	-5.41114	-5.47589							Testing	-5.43611	0.00268901	-1.11375
[Ch]Cl-1,2-propanediol (1 : 4)	313.15	325.1	0.00016	0.29184	0.92235	2.83901	3.94004	1.58806	0.80005	1.11172	1.45643	0.00292	-5.116	-5.03998	-5.02898	-5.02656	-5.04881							Training	-5.02775	0.00254425	-1.02884
[Ch]Cl-1,2-propanediol (1 : 4)	313.15	421.4	0.00016	0.29184	0.92235	2.83901	3.94004	1.58806	0.80005	1.11172	1.45643	0.00292	-4.8159	-4.76811	-4.76487	-4.77543	-4.76042							Training	-4.75091	0.00241889	-1.01048
[Ch]Cl-1,2-propanediol (1 : 4)	313.15	525.6	0.00016	0.29184	0.92235	2.83901	3.94004	1.58806	0.80005	1.11172	1.45643	0.00292	-4.5469	-4.52792	-4.53412	-4.57082	-4.53042							Training	-4.52213	0.00229892	-1.12235
[Ch]Cl-1,2-propanediol (1 : 4)	323.15	122.5	0.00016	0.29184	0.92235	2.83901	3.94004	1.58806	0.80005	1.11172	1.45643	0.00292	-6.2146	-6.2953	-6.26494	-6.27049	-6.29873							Testing	-6.30007	0.0033541	-0.750894
[Ch]Cl-1,2-propanediol (1 : 4)	323.15	226.6	0.00016	0.29184	0.92235	2.83901	3.94004	1.58806	0.80005	1.11172	1.45643	0.00292	-5.6268	-5.62486	-5.60638	-5.60526	-5.63086							Testing	-5.66385	0.00317505	-1.1022
[Ch]Cl-1,2-propanediol (1 : 4)	323.15	326.5	0.00016	0.29184	0.92235	2.83901	3.94004	1.58806	0.80005	1.11172	1.45643	0.00292	-5.2591	-5.24048	-5.23091	-5.22272	-5.20785							Testing	-5.25971	0.00301853	-0.952828
[Ch]Cl-1,2-propanediol (1 : 4)	323.15	425	0.00016	0.29184	0.92235	2.83901	3.94004	1.58806	0.80005	1.11172	1.45643	0.00292	-4.9477	-4.96213	-4.96163	-4.96464	-4.91528							Testing	-4.98041	0.00287887	-0.924112
[Ch]Cl-1,2-propanediol (1 : 4)	323.15	519.8	0.00016	0.29184	0.92235	2.83901	3.94004	1.58806	0.80005	1.11172	1.45643	0.00292	-4.7444	-4.74131	-4.75068	-4.77388	-4.70466							Testing	-4.77368	0.00275821	-1.11994
Betain-diethylene glycol (1 : 4)	308.15	200.5	0	0.11608	0.89264	3.45239	5.54725	1.34344	0.78262	1.35226	1.36441	0.17085	-4.8536	-4.83215	-4.86623	-4.91845	-4.79006							Training	-4.87375	0.00670274	-0.12992
Betain-diethylene glycol (1 : 4)	308.15	343.3	0	0.11608	0.89264	3.45239	5.54725	1.34344	0.78262	1.35226	1.36441	0.17085	-4.2831	-4.26404	-4.26978	-4.30572	-4.23149							Training	-4.28871	0.00674815	0.106359
Betain-diethylene glycol (1 : 4)	308.15	439.8	0	0.11608	0.89264	3.45239	5.54725	1.34344	0.78262	1.35226	1.36441	0.17085	-4.0118	-4.01523	-4.01706	-4.05011	-3.98479							Training	-4.04385	0.00679616	0.0551923
Betain-diethylene glycol (1 : 4)	308.15	525	0	0.11608	0.89264	3.45239	5.54725	1.34344	0.78262	1.35226	1.36441	0.17085	-3.8304	-3.83484	-3.82925	-3.87414	-3.81621							Training	-3.87522	0.00685017	-0.127429
Betain-diethylene glycol (1 : 4)	308.15	632.5	0	0.11608	0.89264	3.45239	5.54725	1.34344	0.78262	1.35226	1.36441	0.17085	-3.6344	-3.64121	-3.62257	-3.68954	-3.64351							Training	-3.69204	0.00693387	-0.43559
Betain-diethylene glycol (1 : 4)	318.15	223.3	0	0.11608	0.89264	3.45239	5.54725	1.34344	0.78262	1.35226	1.36441	0.17085	-4.9337	-4.88078	-4.95391	-4.93285	-4.84116							Testing	-4.9197	0.00641154	-0.162043
Betain-diethylene glycol (1 : 4)	318.15	362.8	0	0.11608	0.89264	3.45239	5.54725	1.34344	0.78262	1.35226	1.36441	0.17085	-4.4063	-4.3752	-4.41897	-4.38712	-4.34247							Training	-4.38766	0.0064436	0.117087
Betain-diethylene glycol (1 : 4)	318.15	464.5	0	0.11608	0.89264	3.45239	5.54725	1.34344	0.78262	1.35226	1.36441	0.17085	-4.1289	-4.1252	-4.15762	-4.12966	-4.10075							Testing	-4.13907	0.00648539	0.0062464
Betain-diethylene glycol (1 : 4)	318.15	554.3	0	0.11608	0.89264	3.45239	5.54725	1.34344	0.78262	1.35226	1.36441	0.17085	-3.9425	-3.94247	-3.96331	-3.94868	-3.93473							Testing	-3.96381	0.00653519	-0.19357
Betain-diethylene glycol (1 : 4)	318.15	668.5	0	0.11608	0.89264	3.45239	5.54725	1.34344	0.78262	1.35226	1.36441	0.17085	-3.7465	-3.74496	-3.75415	-3.75387	-3.76146							Training	-3.76788	0.00661601	-0.517047
Betain-diethylene glycol (1 : 4)	328.15	234	0	0.11608	0.89264	3.45239	5.54725	1.34344	0.78262	1.35226	1.36441	0.17085	-5.0207	-4.99791	-5.04195	-5.0284	-4.9536							Testing	-5.03373	0.00630263	-0.00569128
Betain-diethylene glycol (1 : 4)	328.15	381.3	0	0.11608	0.89264	3.45239	5.54725	1.34344	0.78262	1.35226	1.36441	0.17085	-4.519	-4.49186	-4.50297	-4.4814	-4.45849							Testing	-4.49246	0.00632207	0.120753
Betain-diethylene glycol (1 : 4)	328.15	488.5	0	0.11608	0.89264	3.45239	5.54725	1.34344	0.78262	1.35226	1.36441	0.17085	-4.2405	-4.23877	-4.23658	-4.21884	-4.22025							Training	-4.23752	0.00635668	0.0488746
Betain-diethylene glycol (1 : 4)	328.15	583	0	0.11608	0.89264	3.45239	5.54725	1.34344	0.78262	1.35226	1.36441	0.17085	-4.0456	-4.0531	-4.04257	-4.03097	-4.05597							Testing	-4.05441	0.00640151	-0.201199
Betain-diethylene glycol (1 : 4)	328.15	703.3	0	0.11608	0.89264	3.45239	5.54725	1.34344	0.78262	1.35226	1.36441	0.17085	-3.8538	-3.85274	-3.84126	-3.82526	-3.88223							Training	-3.84652	0.00647796	-0.578542
Betain-diethylene glycol (1 : 4)	338.15	245.5	0	0.11608	0.89264	3.45239	5.54725	1.34344	0.78262	1.35226	1.36441	0.17085	-5.1499	-5.11449	-5.12083	-5.13075	-5.06319							Testing	-5.15414	0.00637863	0.0472108
Betain-diethylene glycol (1 : 4)	338.15	399	0	0.11608	0.89264	3.45239	5.54725	1.34344	0.78262	1.35226	1.36441	0.17085	-4.6152	-4.61276	-4.58516	-4.5869	-4.57783							Training	-4.6094	0.00638385	0.247304
Betain-diethylene glycol (1 : 4)	338.15	511.5	0	0.11608	0.89264	3.45239	5.54725	1.34344	0.78262	1.35226	1.36441	0.17085	-4.3351	-4.35611	-4.31894	-4.31761	-4.34286							Testing	-4.34723	0.00641013	0.0641703
Betain-diethylene glycol (1 : 4)	338.15	610.5	0	0.11608	0.89264	3.45239	5.54725	1.34344	0.78262	1.35226	1.36441	0.17085	-4.1414	-4.16748	-4.13154	-4.12166	-4.17997							Training	-4.15603	0.00644898	-0.150487
Betain-diethylene glycol (1 : 4)	338.15	736.8	0	0.11608	0.89264	3.45239	5.54725	1.34344	0.78262	1.35226	1.36441	0.17085	-3.9477	-3.96435	-3.9445	-3.90366	-4.00514							Testing	-3.93661	0.00651989	-0.623197
Betain-diethylene glycol (1 : 4)	348.15	256.3	0	0.11608	0.89264	3.45239	5.54725	1.34344	0.78262	1.35226	1.36441	0.17085	-5.2591	-5.23699	-5.20875	-5.24637	-5.17582							Training	-5.29351	0.00663956	0.191077
Betain-diethylene glycol (1 : 4)	348.15	416.3	0	0.11608	0.89264	3.45239	5.54725	1.34344	0.78262	1.35226	1.36441	0.17085	-4.7105	-4.7364	-4.67792	-4.70165	-4.69862							Training	-4.74251	0.0066292	0.339788
Betain-diethylene glycol (1 : 4)	348.15	533.8	0	0.11608	0.89264	3.45239	5.54725	1.34344	0.78262	1.35226	1.36441	0.17085	-4.4312	-4.47621	-4.41951	-4.42473	-4.46715							Training	-4.47285	0.00664606	0.156808
Betain-diethylene glycol (1 : 4)	348.15	637.3	0	0.11608	0.89264	3.45239	5.54725	1.34344	0.78262	1.35226	1.36441	0.17085	-4.2336	-4.28442	-4.24492	-4.21947	-4.3052							Testing	-4.27323	0.00667808	-0.152455
Betain-diethylene glycol (1 : 4)	348.15	769.3	0	0.11608	0.89264	3.45239	5.54725	1.34344	0.78262	1.35226	1.36441	0.17085	-4.0399	-4.07907	-4.07829	-3.98846	-4.12917							Training	-4.04321	0.00674225	-0.608307
[Ch]Cl-1,2-butanediol (1 : 4)	303.15	371.3	0.0016	0.22732	0.91411	2.58649	5.22108	2.2261	0.74201	1.1082	1.39947	0.00108	-4.4312	-4.46897	-4.51002	-4.44046	-4.34812							Testing	-4.39451	0.0027297	-0.498675
[Ch]Cl-1,2-butanediol (1 : 4)	303.15	797.5	0.0016	0.22732	0.91411	2.58649	5.22108	2.2261	0.74201	1.1082	1.39947	0.00108	-3.6574	-3.6439	-3.71954	-3.75237	-3.6244							Training	-3.64717	0.0023517	-1.70149
[Ch]Cl-1,2-butanediol (1 : 4)	303.15	1225.5	0.0016	0.22732	0.91411	2.58649	5.22108	2.2261	0.74201	1.1082	1.39947	0.00108	-3.2289	-3.18693	-3.25596	-3.33056	-3.22623							Training	-3.22825	0.00224649	-1.28875
[Ch]Cl-1,2-butanediol (1 : 4)	303.15	1646.3	0.0016	0.22732	0.91411	2.58649	5.22108	2.2261	0.74201	1.1082	1.39947	0.00108	-2.8842	-2.91391	-2.95907	-3.025	-2.91122							Testing	-2.9727	0.00241113	-0.829371
[Ch]Cl-1,2-butanediol (1 : 4)	303.15	2076.8	0.0016	0.22732	0.91411	2.58649	5.22108	2.2261	0.74201	1.1082	1.39947	0.00108	-2.6664	-2.71274	-2.74495	-2.78354	-2.64167							Testing	-2.78055	0.00285463	-0.661093
[Ch]Cl-1,2-butanediol (1 : 4)	303.15	2507.8	0.0016	0.22732	0.91411	2.58649	5.22108	2.2261	0.74201	1.1082	1.39947	0.00108	-2.4901	-2.54169	-2.58122	-2.58465	-2.42398							Testing	-2.61047	0.00357732	-0.589404
[Ch]Cl-1,2-butanediol (1 : 4)	303.15	2956.8	0.0016	0.22732	0.91411	2.58649	5.22108	2.2261	0.74201	1.1082	1.39947	0.00108	-2.332	-2.37325	-2.44102	-2.40083	-2.25396							Testing	-2.44347	0.00462675	-0.573976
[Ch]Cl-1,2-butanediol (1 : 4)	313.15	388.3	0.0016	0.22732	0.91411	2.58649	5.22108	2.2261	0.74201	1.1082	1.39947	0.00108	-4.5564	-4.57814	-4.58095	-4.53879	-4.44347							Training	-4.49205	0.00311208	-0.448067
[Ch]Cl-1,2-butanediol (1 : 4)	313.15	835.8	0.0016	0.22732	0.91411	2.58649	5.22108	2.2261	0.74201	1.1082	1.39947	0.00108	-3.7898	-3.73743	-3.78014	-3.82631	-3.71754							Training	-3.74291	0.00268012	-1.84746
[Ch]Cl-1,2-butanediol (1 : 4)	313.15	1285.5	0.0016	0.22732	0.91411	2.58649	5.22108	2.2261	0.74201	1.1082	1.39947	0.00108	-3.3524	-3.27996	-3.31516	-3.38067	-3.30177							Training	-3.32147	0.00254887	-1.37914
[Ch]Cl-1,2-butanediol (1 : 4)	313.15	1729.8	0.0016	0.22732	0.91411	2.58649	5.22108	2.2261	0.74201	1.1082	1.39947	0.00108	-3.0018	-3.00752	-3.01895	-3.06141	-2.97017							Training	-3.05215	0.0027173	-0.904507
[Ch]Cl-1,2-butanediol (1 : 4)	313.15	2186	0.0016	0.22732	0.91411	2.58649	5.22108	2.2261	0.74201	1.1082	1.39947	0.00108	-2.7855	-2.80308	-2.80481	-2.8126	-2.69171							Training	-2.83406	0.00319858	-0.756903
[Ch]Cl-1,2-butanediol (1 : 4)	313.15	2644.3	0.0016	0.22732	0.91411	2.58649	5.22108	2.2261	0.74201	1.1082	1.39947	0.00108	-2.6064	-2.62489	-2.63934	-2.60901	-2.47586							Testing	-2.63533	0.00399663	-0.721143
[Ch]Cl-1,2-butanediol (1 : 4)	313.15	3125	0.0016	0.22732	0.91411	2.58649	5.22108	2.2261	0.74201	1.1082	1.39947	0.00108	-2.4511	-2.44497	-2.49501	-2.41945	-2.31867							Testing	-2.44426	0.00517247	-0.73699
[Ch]Cl-1,2-butanediol (1 : 4)	323.15	404.5	0.0016	0.22732	0.91411	2.58649	5.22108	2.2261	0.74201	1.1082	1.39947	0.00108	-4.6565	-4.69369	-4.65656	-4.64555	-4.54853							Training	-4.6106	0.00367929	-0.359036
[Ch]Cl-1,2-butanediol (1 : 4)	323.15	871.5	0.0016	0.22732	0.91411	2.58649	5.22108	2.2261	0.74201	1.1082	1.39947	0.00108	-3.8922	-3.83859	-3.84705	-3.90541	-3.81982							Testing	-3.85674	0.00319073	-1.90239
[Ch]Cl-1,2-butanediol (1 : 4)	323.15	1343.3	0.0016	0.22732	0.91411	2.58649	5.22108	2.2261	0.74201	1.1082	1.39947	0.00108	-3.4609	-3.37932	-3.37969	-3.43338	-3.38588							Training	-3.42814	0.00302959	-1.43231
[Ch]Cl-1,2-butanediol (1 : 4)	323.15	1808.8	0.0016	0.22732	0.91411	2.58649	5.22108	2.2261	0.74201	1.1082	1.39947	0.00108	-3.0944	-3.10758	-3.08488	-3.10125	-3.04169							Training	-3.1433	0.00319807	-0.936989
[Ch]Cl-1,2-butanediol (1 : 4)	323.15	2289	0.0016	0.22732	0.91411	2.58649	5.22108	2.2261	0.74201	1.1082	1.39947	0.00108	-2.8735	-2.89934	-2.87044	-2.84561	-2.75946							Training	-2.90076	0.00371271	-0.797649
[Ch]Cl-1,2-butanediol (1 : 4)	323.15	2775	0.0016	0.22732	0.91411	2.58649	5.22108	2.2261	0.74201	1.1082	1.39947	0.00108	-2.7016	-2.71287	-2.70212	-2.63709	-2.55011							Training	-2.6779	0.00458599	-0.778791
[Ch]Cl-1,2-butanediol (1 : 4)	323.15	3285.3	0.0016	0.22732	0.91411	2.58649	5.22108	2.2261	0.74201	1.1082	1.39947	0.00108	-2.5396	-2.52132	-2.55337	-2.44271	-2.40799							Training	-2.47194	0.00588453	-0.802719
[Ch]Cl-1,2-butanediol (1 : 4)	333.15	420.5	0.0016	0.22732	0.91411	2.58649	5.22108	2.2261	0.74201	1.1082	1.39947	0.00108	-4.756	-4.81382	-4.7352	-4.75934	-4.66176							Training	-4.74648	0.00443067	-0.267151
[Ch]Cl-1,2-butanediol (1 : 4)	333.15	907	0.0016	0.22732	0.91411	2.58649	5.22108	2.2261	0.74201	1.1082	1.39947	0.00108	-3.99	-3.94401	-3.91703	-3.98732	-3.9295							Testing	-3.98519	0.00388221	-1.94559
[Ch]Cl-1,2-butanediol (1 : 4)	333.15	1399.8	0.0016	0.22732	0.91411	2.58649	5.22108	2.2261	0.74201	1.1082	1.39947	0.00108	-3.5614	-3.48399	-3.44857	-3.48839	-3.47979							Training	-3.54848	0.00368886	-1.46553
[Ch]Cl-1,2-butanediol (1 : 4)	333.15	1886.3	0.0016	0.22732	0.91411	2.58649	5.22108	2.2261	0.74201	1.1082	1.39947	0.00108	-3.1749	-3.21219	-3.15487	-3.14295	-3.1266							Testing	-3.24714	0.00385556	-0.957154
[Ch]Cl-1,2-butanediol (1 : 4)	333.15	2391.8	0.0016	0.22732	0.91411	2.58649	5.22108	2.2261	0.74201	1.1082	1.39947	0.00108	-2.9642	-2.99876	-2.9391	-2.87985	-2.84457							Training	-2.98136	0.00440513	-0.84462
[Ch]Cl-1,2-butanediol (1 : 4)	333.15	2903.8	0.0016	0.22732	0.91411	2.58649	5.22108	2.2261	0.74201	1.1082	1.39947	0.00108	-2.7887	-2.8039	-2.76795	-2.66735	-2.64481							Training	-2.73992	0.00535278	-0.837984
[Ch]Cl-1,2-butanediol (1 : 4)	333.15	3443.3	0.0016	0.22732	0.91411	2.58649	5.22108	2.2261	0.74201	1.1082	1.39947	0.00108	-2.6228	-2.59998	-2.61419	-2.46842	-2.51135							Testing	-2.52606	0.00677709	-0.894717
[Ch]Cl-DEG (1 : 4)	303.15	524.2	0	0.11608	1.01195	3.73249	5.44256	1.30326	0.84497	1.50136	1.65147	0.00076	-4.0804	-4.07959	-4.08197	-4.10417	-4.06768							Training	-4.0464	0.00351327	-0.764744
[Ch]Cl-DEG (1 : 4)	303.15	617.3	0	0.11608	1.01195	3.73249	5.44256	1.30326	0.84497	1.50136	1.65147	0.00076	-3.917	-3.90768	-3.89732	-3.94482	-3.89955							Training	-3.88023	0.00348179	-1.04663
[Ch]Cl-DEG (1 : 4)	303.15	726.5	0	0.11608	1.01195	3.73249	5.44256	1.30326	0.84497	1.50136	1.65147	0.00076	-3.7508	-3.73424	-3.71086	-3.77976	-3.73187							Training	-3.71068	0.00346144	-1.43745
[Ch]Cl-DEG (1 : 4)	303.15	846.3	0	0.11608	1.01195	3.73249	5.44256	1.30326	0.84497	1.50136	1.65147	0.00076	-3.5972	-3.57417	-3.54334	-3.61675	-3.57							Training	-3.54846	0.00345971	-1.77281
[Ch]Cl-DEG (1 : 4)	303.15	924.3	0	0.11608	1.01195	3.73249	5.44256	1.30326	0.84497	1.50136	1.65147	0.00076	-3.5099	-3.48508	-3.45197	-3.51836	-3.47242							Training	-3.45466	0.00347016	-1.62861
[Ch]Cl-DEG (1 : 4)	303.15	1032.2	0	0.11608	1.01195	3.73249	5.44256	1.30326	0.84497	1.50136	1.65147	0.00076	-3.4022	-3.37923	-3.34328	-3.39067	-3.34414							Testing	-3.33933	0.00349967	-1.46728
[Ch]Cl-DEG (1 : 4)	303.15	1119.7	0	0.11608	1.01195	3.73249	5.44256	1.30326	0.84497	1.50136	1.65147	0.00076	-3.3215	-3.30649	-3.26684	-3.29353	-3.24428							Testing	-3.25744	0.00353644	-1.34863
[TBA]Br-EG (1 : 4)	303.15	542.8	0	0.31344	0.70746	2.85855	5.69779	2.46526	0.62677	1.00233	1.53821	0.00159	-3.9739	-3.97743	-4.02112	-3.91841	-3.89103							Testing	-4.02784	0.0041411	-0.704552
[TBA]Br-EG (1 : 4)	303.15	669.5	0	0.31344	0.70746	2.85855	5.69779	2.46526	0.62677	1.00233	1.53821	0.00159	-3.7132	-3.74362	-3.76345	-3.71413	-3.70088							Training	-3.78941	0.00400977	-0.974999
[TBA]Br-EG (1 : 4)	303.15	802.1	0	0.31344	0.70746	2.85855	5.69779	2.46526	0.62677	1.00233	1.53821	0.00159	-3.5336	-3.53941	-3.53561	-3.53114	-3.54438							Testing	-3.5766	0.00389813	-1.50854
[TBA]Br-EG (1 : 4)	303.15	832.5	0	0.31344	0.70746	2.85855	5.69779	2.46526	0.62677	1.00233	1.53821	0.00159	-3.4802	-3.49766	-3.48838	-3.49224	-3.51239							Training	-3.53187	0.00387626	-1.59403
[TBA]Br-EG (1 : 4)	303.15	1075.9	0	0.31344	0.70746	2.85855	5.69779	2.46526	0.62677	1.00233	1.53821	0.00159	-3.234	-3.22046	-3.16474	-3.21082	-3.28707							Training	-3.21699	0.00375113	-1.21848
[TBA]Br-EG (1 : 4)	303.15	1374.2	0	0.31344	0.70746	2.85855	5.69779	2.46526	0.62677	1.00233	1.53821	0.00159	-3.0038	-2.98542	-2.86875	-2.92237	-3.05406							Testing	-2.91101	0.00371907	-0.930115
[TBA]Br-DEG (1 : 4)	303.15	590	0	0.11608	0.7643	3.48227	8.29519	2.88174	0.73609	1.38877	1.67321	0.00159	-3.0555	-3.10338	-3.11414	-3.04729	-3.163							Training	-2.97553	0.00348777	0.592361
[TBA]Br-DEG (1 : 4)	303.15	639.9	0	0.11608	0.7643	3.48227	8.29519	2.88174	0.73609	1.38877	1.67321	0.00159	-2.9898	-3.00469	-3.02669	-2.97332	-3.07749							Training	-2.88373	0.00348588	0.389544
[TBA]Br-DEG (1 : 4)	303.15	756.9	0	0.11608	0.7643	3.48227	8.29519	2.88174	0.73609	1.38877	1.67321	0.00159	-2.8184	-2.79621	-2.83653	-2.81313	-2.89779							Training	-2.68812	0.0034961	-0.0449679
[TBA]Br-DEG (1 : 4)	303.15	908.8	0	0.11608	0.7643	3.48227	8.29519	2.88174	0.73609	1.38877	1.67321	0.00159	-2.5396	-2.56748	-2.6067	-2.62357	-2.69182							Testing	-2.46683	0.00354003	0.117603
[TBA]Br-DEG (1 : 4)	303.15	1047.7	0	0.11608	0.7643	3.48227	8.29519	2.88174	0.73609	1.38877	1.67321	0.00159	-2.4113	-2.39337	-2.4001	-2.4623	-2.51906							Testing	-2.29129	0.00361051	0.306406
[TBA]Br-methyldiethanol amine (1 : 4)	303.15	502.5	0	0.00444	0.47446	3.43975	9.69983	3.21194	0.66565	1.05441	1.74861	0.00407	-2.2082	-2.22615	-2.20231	-2.24428	-2.20089							Testing	-2.27175	0.00702297	2.84458
[TBA]Br-methyldiethanol amine (1 : 4)	303.15	664.3	0	0.00444	0.47446	3.43975	9.69983	3.21194	0.66565	1.05441	1.74861	0.00407	-1.9555	-1.93092	-1.9096	-1.95441	-1.96004							Testing	-1.99985	0.00706803	2.2918
[TBA]Br-methyldiethanol amine (1 : 4)	303.15	711.9	0	0.00444	0.47446	3.43975	9.69983	3.21194	0.66565	1.05441	1.74861	0.00407	-1.7832	-1.85639	-1.8357	-1.87954	-1.90112							Training	-1.93168	0.00708876	2.44006
[TBA]Br-methyldiethanol amine (1 : 4)	303.15	834	0	0.00444	0.47446	3.43975	9.69983	3.21194	0.66565	1.05441	1.74861	0.00407	-1.6756	-1.68729	-1.66551	-1.70251	-1.76496							Testing	-1.77488	0.00715751	1.91582
[TBA]Br-methyldiethanol amine (1 : 4)	303.15	904	0	0.00444	0.47446	3.43975	9.69983	3.21194	0.66565	1.05441	1.74861	0.00407	-1.6005	-1.60342	-1.5783	-1.6093	-1.69394							Testing	-1.69517	0.00720701	2.03518
[TBA]Br-methyldiethanol amine (1 : 4)	303.15	1021	0	0.00444	0.47446	3.43975	9.69983	3.21194	0.66565	1.05441	1.74861	0.00407	-1.4908	-1.48196	-1.44454	-1.46524	-1.58311							Training	-1.57636	0.00730617	2.27863
[Ch]Cl-Guaiacol (1 : 4)	293.15	52.1	0	0.18016	0.58499	4.36849	3.7234	3.16958	2.72345	0.85724	0.74939	0.00076	-6.1193	-6.10907	-6.1376	-6.13497	-6.00303							Training	-6.0634	0.0045186	-1.48012
[Ch]Cl-Guaiacol (1 : 4)	293.15	143.2	0	0.18016	0.58499	4.36849	3.7234	3.16958	2.72345	0.85724	0.74939	0.00076	-5.116	-5.14275	-5.16298	-5.18494	-5.22257							Testing	-5.25512	0.0044837	-0.758749
[Ch]Cl-Guaiacol (1 : 4)	293.15	231.9	0	0.18016	0.58499	4.36849	3.7234	3.16958	2.72345	0.85724	0.74939	0.00076	-4.6356	-4.64681	-4.65828	-4.65095	-4.70701							Training	-4.68148	0.00446168	-0.872183
[Ch]Cl-Guaiacol (1 : 4)	293.15	326.5	0	0.18016	0.58499	4.36849	3.7234	3.16958	2.72345	0.85724	0.74939	0.00076	-4.2977	-4.31197	-4.31553	-4.29959	-4.32298							Training	-4.2767	0.00445121	-0.752243
[Ch]Cl-Guaiacol (1 : 4)	293.15	430	0	0.18016	0.58499	4.36849	3.7234	3.16958	2.72345	0.85724	0.74939	0.00076	-4.0174	-4.04	-4.04116	-4.04562	-4.02303							Training	-3.99525	0.00445515	-0.832373
[Ch]Cl-Guaiacol (1 : 4)	293.15	526	0	0.18016	0.58499	4.36849	3.7234	3.16958	2.72345	0.85724	0.74939	0.00076	-3.8122	-3.82948	-3.8342	-3.87211	-3.81282							Training	-3.8164	0.00447318	-1.03624
[Ch]Cl-Guaiacol (1 : 4)	303.15	100.3	0	0.18016	0.58499	4.36849	3.7234	3.16958	2.72345	0.85724	0.74939	0.00076	-5.655	-5.66277	-5.67663	-5.70843	-5.7199							Training	-5.73893	0.0042399	-0.73388
[Ch]Cl-Guaiacol (1 : 4)	303.15	151.3	0	0.18016	0.58499	4.36849	3.7234	3.16958	2.72345	0.85724	0.74939	0.00076	-5.2214	-5.23622	-5.24554	-5.27335	-5.33731							Testing	-5.32845	0.00421641	-0.644584
[Ch]Cl-Guaiacol (1 : 4)	303.15	264.2	0	0.18016	0.58499	4.36849	3.7234	3.16958	2.72345	0.85724	0.74939	0.00076	-4.667	-4.66997	-4.66798	-4.66488	-4.73002							Testing	-4.66992	0.00417828	-0.757755
[Ch]Cl-Guaiacol (1 : 4)	303.15	341.7	0	0.18016	0.58499	4.36849	3.7234	3.16958	2.72345	0.85724	0.74939	0.00076	-4.4145	-4.41962	-4.41237	-4.40628	-4.44003							Testing	-4.38236	0.00416318	-0.717799
[Ch]Cl-Guaiacol (1 : 4)	303.15	437.4	0	0.18016	0.58499	4.36849	3.7234	3.16958	2.72345	0.85724	0.74939	0.00076	-4.1605	-4.17399	-4.16613	-4.17672	-4.16888							Testing	-4.14385	0.00415697	-0.802435
[Ch]Cl-Guaiacol (1 : 4)	303.15	545.9	0	0.18016	0.58499	4.36849	3.7234	3.16958	2.72345	0.85724	0.74939	0.00076	-3.9425	-3.93939	-3.93775	-3.98074	-3.93385							Training	-3.95851	0.00416657	-1.04517
[Ch]Cl-Guaiacol (1 : 4)	313.15	53.4	0	0.18016	0.58499	4.36849	3.7234	3.16958	2.72345	0.85724	0.74939	0.00076	-6.5713	-6.38811	-6.39694	-6.39624	-6.3161							Testing	-6.28372	0.00419926	-1.55651
[Ch]Cl-Guaiacol (1 : 4)	313.15	142.5	0	0.18016	0.58499	4.36849	3.7234	3.16958	2.72345	0.85724	0.74939	0.00076	-5.4262	-5.44965	-5.44969	-5.49526	-5.56093							Training	-5.51443	0.00414381	-0.437144
[Ch]Cl-Guaiacol (1 : 4)	313.15	235.9	0	0.18016	0.58499	4.36849	3.7234	3.16958	2.72345	0.85724	0.74939	0.00076	-4.9337	-4.93319	-4.92358	-4.94452	-5.02192							Training	-4.93598	0.00409847	-0.721755
[Ch]Cl-Guaiacol (1 : 4)	313.15	335.5	0	0.18016	0.58499	4.36849	3.7234	3.16958	2.72345	0.85724	0.74939	0.00076	-4.5756	-4.58915	-4.57209	-4.58178	-4.62293							Testing	-4.54358	0.00406455	-0.614293
[Ch]Cl-Guaiacol (1 : 4)	313.15	431.8	0	0.18016	0.58499	4.36849	3.7234	3.16958	2.72345	0.85724	0.74939	0.00076	-4.3275	-4.33833	-4.32106	-4.34179	-4.34231							Testing	-4.30654	0.00404591	-0.716826
[Ch]Cl-Guaiacol (1 : 4)	313.15	542.9	0	0.18016	0.58499	4.36849	3.7234	3.16958	2.72345	0.85724	0.74939	0.00076	-4.1044	-4.09544	-4.08583	-4.13278	-4.09487							Testing	-4.12346	0.0040417	-0.981453
[Ch]Cl-Guaiacol (1 : 4)	323.15	54.7	0	0.18016	0.58499	4.36849	3.7234	3.16958	2.72345	0.85724	0.74939	0.00076	-6.5713	-6.51743	-6.51699	-6.52985	-6.45672							Testing	-6.36761	0.00431988	-1.07879
[Ch]Cl-Guaiacol (1 : 4)	323.15	143.6	0	0.18016	0.58499	4.36849	3.7234	3.16958	2.72345	0.85724	0.74939	0.00076	-5.5728	-5.59182	-5.58222	-5.64995	-5.71142							Training	-5.61264	0.00425405	-0.292908
[Ch]Cl-Guaiacol (1 : 4)	323.15	238.5	0	0.18016	0.58499	4.36849	3.7234	3.16958	2.72345	0.85724	0.74939	0.00076	-5.0672	-5.07345	-5.05376	-5.09907	-5.16887							Training	-5.03997	0.00419687	-0.614081
[Ch]Cl-Guaiacol (1 : 4)	323.15	336.7	0	0.18016	0.58499	4.36849	3.7234	3.16958	2.72345	0.85724	0.74939	0.00076	-4.7105	-4.73697	-4.71026	-4.74267	-4.77721							Training	-4.66654	0.00415194	-0.475529
[Ch]Cl-Guaiacol (1 : 4)	323.15	435.2	0	0.18016	0.58499	4.36849	3.7234	3.16958	2.72345	0.85724	0.74939	0.00076	-4.4568	-4.48116	-4.4552	-4.49451	-4.48967							Testing	-4.43498	0.00412141	-0.607159
[Ch]Cl-Guaiacol (1 : 4)	323.15	535.3	0	0.18016	0.58499	4.36849	3.7234	3.16958	2.72345	0.85724	0.74939	0.00076	-4.2616	-4.26079	-4.24302	-4.29992	-4.26268							Training	-4.27673	0.00410531	-0.839603
DiethylammoniumCl-Guaiacol (1 : 4)	293.15	49.6	0.15301	0.38825	0.3825	4.13711	3.89222	3.27251	2.59248	0.55748	0.9567	0.12354	-5.9915	-5.97112	-5.95822	-5.98652	-5.9189							Training	-5.87357	0.0118366	-0.945846
DiethylammoniumCl-Guaiacol (1 : 4)	293.15	134.6	0.15301	0.38825	0.3825	4.13711	3.89222	3.27251	2.59248	0.55748	0.9567	0.12354	-5.0056	-5.01287	-5.01774	-5.06267	-5.13421							Training	-5.12104	0.0118178	-0.135052
DiethylammoniumCl-Guaiacol (1 : 4)	293.15	224.4	0.15301	0.38825	0.3825	4.13711	3.89222	3.27251	2.59248	0.55748	0.9567	0.12354	-4.5008	-4.48485	-4.47428	-4.4898	-4.57474							Training	-4.53356	0.0118097	-0.309934
DiethylammoniumCl-Guaiacol (1 : 4)	293.15	323.1	0.15301	0.38825	0.3825	4.13711	3.89222	3.27251	2.59248	0.55748	0.9567	0.12354	-4.1414	-4.13247	-4.10045	-4.10701	-4.1604							Training	-4.11296	0.0118148	-0.168587
DiethylammoniumCl-Guaiacol (1 : 4)	293.15	411.3	0.15301	0.38825	0.3825	4.13711	3.89222	3.27251	2.59248	0.55748	0.9567	0.12354	-3.8873	-3.89773	-3.85749	-3.87765	-3.90098							Testing	-3.87249	0.0118317	-0.232835
DiethylammoniumCl-Guaiacol (1 : 4)	293.15	516.1	0.15301	0.38825	0.3825	4.13711	3.89222	3.27251	2.59248	0.55748	0.9567	0.12354	-3.6535	-3.66074	-3.62824	-3.67624	-3.67586							Testing	-3.67813	0.0118669	-0.428328
DiethylammoniumCl-Guaiacol (1 : 4)	303.15	61.7	0.15301	0.38825	0.3825	4.13711	3.89222	3.27251	2.59248	0.55748	0.9567	0.12354	-5.8781	-5.92208	-5.93036	-5.93982	-5.90591							Testing	-5.87924	0.0117187	-0.412005
DiethylammoniumCl-Guaiacol (1 : 4)	303.15	142.6	0.15301	0.38825	0.3825	4.13711	3.89222	3.27251	2.59248	0.55748	0.9567	0.12354	-5.0672	-5.08674	-5.10467	-5.12928	-5.19918							Testing	-5.18721	0.0116924	0.0491167
DiethylammoniumCl-Guaiacol (1 : 4)	303.15	227.5	0.15301	0.38825	0.3825	4.13711	3.89222	3.27251	2.59248	0.55748	0.9567	0.12354	-4.6052	-4.60807	-4.60873	-4.61067	-4.68636							Training	-4.64908	0.0116752	-0.137044
DiethylammoniumCl-Guaiacol (1 : 4)	303.15	345.8	0.15301	0.38825	0.3825	4.13711	3.89222	3.27251	2.59248	0.55748	0.9567	0.12354	-4.1865	-4.20584	-4.18088	-4.17648	-4.21395							Testing	-4.17775	0.0116694	-0.0321709
DiethylammoniumCl-Guaiacol (1 : 4)	303.15	425.4	0.15301	0.38825	0.3825	4.13711	3.89222	3.27251	2.59248	0.55748	0.9567	0.12354	-3.9846	-4.00285	-3.97252	-3.98066	-3.99403							Training	-3.97971	0.0116774	-0.0901241
DiethylammoniumCl-Guaiacol (1 : 4)	303.15	524.8	0.15301	0.38825	0.3825	4.13711	3.89222	3.27251	2.59248	0.55748	0.9567	0.12354	-3.7766	-3.78154	-3.76038	-3.7914	-3.78605							Training	-3.80302	0.0117006	-0.311774
DiethylammoniumCl-Guaiacol (1 : 4)	313.15	54.2	0.15301	0.38825	0.3825	4.13711	3.89222	3.27251	2.59248	0.55748	0.9567	0.12354	-6.2146	-6.16408	-6.18472	-6.15517	-6.10773							Training	-6.07357	0.0117954	-0.534554
DiethylammoniumCl-Guaiacol (1 : 4)	313.15	141.1	0.15301	0.38825	0.3825	4.13711	3.89222	3.27251	2.59248	0.55748	0.9567	0.12354	-5.24	-5.23254	-5.26459	-5.27226	-5.33845							Training	-5.32563	0.0117561	0.215539
DiethylammoniumCl-Guaiacol (1 : 4)	313.15	242.2	0.15301	0.38825	0.3825	4.13711	3.89222	3.27251	2.59248	0.55748	0.9567	0.12354	-4.7105	-4.68362	-4.69268	-4.6798	-4.74675							Testing	-4.70641	0.0117246	-0.0844984
DiethylammoniumCl-Guaiacol (1 : 4)	313.15	346.8	0.15301	0.38825	0.3825	4.13711	3.89222	3.27251	2.59248	0.55748	0.9567	0.12354	-4.3428	-4.34141	-4.32721	-4.31045	-4.34342							Testing	-4.30903	0.0117082	0.0317982
DiethylammoniumCl-Guaiacol (1 : 4)	313.15	431.8	0.15301	0.38825	0.3825	4.13711	3.89222	3.27251	2.59248	0.55748	0.9567	0.12354	-4.1227	-4.12673	-4.10686	-4.10138	-4.11068							Testing	-4.10148	0.0117069	-0.0561253
DiethylammoniumCl-Guaiacol (1 : 4)	313.15	529.2	0.15301	0.38825	0.3825	4.13711	3.89222	3.27251	2.59248	0.55748	0.9567	0.12354	-3.917	-3.91147	-3.90146	-3.91474	-3.90839							Training	-3.9309	0.0117188	-0.233333
DiethylammoniumCl-Guaiacol (1 : 4)	323.15	58.9	0.15301	0.38825	0.3825	4.13711	3.89222	3.27251	2.59248	0.55748	0.9567	0.12354	-6.2659	-6.22626	-6.26498	-6.21274	-6.18419							Testing	-6.14654	0.0120535	-0.260805
DiethylammoniumCl-Guaiacol (1 : 4)	323.15	148.4	0.15301	0.38825	0.3825	4.13711	3.89222	3.27251	2.59248	0.55748	0.9567	0.12354	-5.2983	-5.31417	-5.35956	-5.35005	-5.41931							Testing	-5.39304	0.0120031	0.412752
DiethylammoniumCl-Guaiacol (1 : 4)	323.15	230.1	0.15301	0.38825	0.3825	4.13711	3.89222	3.27251	2.59248	0.55748	0.9567	0.12354	-4.8796	-4.86993	-4.89508	-4.87251	-4.94065							Training	-4.89052	0.0119676	0.0794688
DiethylammoniumCl-Guaiacol (1 : 4)	323.15	337.7	0.15301	0.38825	0.3825	4.13711	3.89222	3.27251	2.59248	0.55748	0.9567	0.12354	-4.483	-4.50484	-4.50343	-4.47444	-4.50932							Training	-4.46165	0.0119361	0.244892
DiethylammoniumCl-Guaiacol (1 : 4)	323.15	430.4	0.15301	0.38825	0.3825	4.13711	3.89222	3.27251	2.59248	0.55748	0.9567	0.12354	-4.2405	-4.2689	-4.25976	-4.24003	-4.25018							Training	-4.22956	0.0119229	0.152905
DiethylammoniumCl-Guaiacol (1 : 4)	323.15	526.8	0.15301	0.38825	0.3825	4.13711	3.89222	3.27251	2.59248	0.55748	0.9567	0.12354	-4.0456	-4.05564	-4.05589	-4.05133	-4.04739							Training	-4.05835	0.0119228	-0.078186
[Ach]Cl-Guaiacol (1 : 4)	293.15	55.1	0	0.18016	0.58442	4.43994	4.27675	3.28794	2.76351	0.94932	0.72817	0.00265	-5.9522	-5.94981	-5.9536	-5.93608	-5.84943							Training	-5.85758	0.00568056	-1.27711
[Ach]Cl-Guaiacol (1 : 4)	293.15	138.4	0	0.18016	0.58442	4.43994	4.27675	3.28794	2.76351	0.94932	0.72817	0.00265	-4.9908	-5.03163	-5.02413	-5.0485	-5.12485							Testing	-5.11855	0.00565111	-0.520071
[Ach]Cl-Guaiacol (1 : 4)	293.15	227.6	0	0.18016	0.58442	4.43994	4.27675	3.28794	2.76351	0.94932	0.72817	0.00265	-4.5008	-4.5056	-4.49639	-4.49217	-4.58763							Testing	-4.53401	0.00563111	-0.693549
[Ach]Cl-Guaiacol (1 : 4)	293.15	326.4	0	0.18016	0.58442	4.43994	4.27675	3.28794	2.76351	0.94932	0.72817	0.00265	-4.1477	-4.14821	-4.14187	-4.12297	-4.17409							Training	-4.1096	0.00562291	-0.54505
[Ach]Cl-Guaiacol (1 : 4)	293.15	422.1	0	0.18016	0.58442	4.43994	4.27675	3.28794	2.76351	0.94932	0.72817	0.00265	-3.8873	-3.89432	-3.89641	-3.89075	-3.8856							Testing	-3.84743	0.00562893	-0.640083
[Ach]Cl-Guaiacol (1 : 4)	293.15	524.9	0	0.18016	0.58442	4.43994	4.27675	3.28794	2.76351	0.94932	0.72817	0.00265	-3.6809	-3.66803	-3.68446	-3.71047	-3.64983							Testing	-3.65475	0.00565072	-0.885016
[Ach]Cl-Guaiacol (1 : 4)	303.15	54.8	0	0.18016	0.58442	4.43994	4.27675	3.28794	2.76351	0.94932	0.72817	0.00265	-6.1193	-6.09326	-6.09688	-6.05395	-5.99344							Training	-5.9672	0.0054314	-1.1563
[Ach]Cl-Guaiacol (1 : 4)	303.15	140.6	0	0.18016	0.58442	4.43994	4.27675	3.28794	2.76351	0.94932	0.72817	0.00265	-5.185	-5.15519	-5.1469	-5.15771	-5.25451							Training	-5.21808	0.0053909	-0.481818
[Ach]Cl-Guaiacol (1 : 4)	303.15	263.7	0	0.18016	0.58442	4.43994	4.27675	3.28794	2.76351	0.94932	0.72817	0.00265	-4.5282	-4.49948	-4.48967	-4.4666	-4.56531							Testing	-4.48624	0.0053521	-0.577776
[Ach]Cl-Guaiacol (1 : 4)	303.15	338.6	0	0.18016	0.58442	4.43994	4.27675	3.28794	2.76351	0.94932	0.72817	0.00265	-4.2759	-4.25424	-4.24781	-4.21756	-4.27712							Training	-4.20834	0.00533961	-0.493749
[Ach]Cl-Guaiacol (1 : 4)	303.15	431.8	0	0.18016	0.58442	4.43994	4.27675	3.28794	2.76351	0.94932	0.72817	0.00265	-4.0342	-4.01286	-4.01595	-3.99677	-4.00203							Training	-3.97407	0.00533584	-0.591217
[Ach]Cl-Guaiacol (1 : 4)	303.15	558.6	0	0.18016	0.58442	4.43994	4.27675	3.28794	2.76351	0.94932	0.72817	0.00265	-3.781	-3.74099	-3.76427	-3.77924	-3.71865							Training	-3.76161	0.00535165	-0.90266
[Ach]Cl-Guaiacol (1 : 4)	313.15	55.5	0	0.18016	0.58442	4.43994	4.27675	3.28794	2.76351	0.94932	0.72817	0.00265	-6.1193	-6.21999	-6.22368	-6.1671	-6.12004							Training	-6.05659	0.00536902	-0.658286
[Ach]Cl-Guaiacol (1 : 4)	313.15	140.8	0	0.18016	0.58442	4.43994	4.27675	3.28794	2.76351	0.94932	0.72817	0.00265	-5.24	-5.29286	-5.28435	-5.2912	-5.39052							Training	-5.32298	0.00531859	-0.104905
[Ach]Cl-Guaiacol (1 : 4)	313.15	235.8	0	0.18016	0.58442	4.43994	4.27675	3.28794	2.76351	0.94932	0.72817	0.00265	-4.733	-4.75165	-4.74083	-4.7236	-4.83156							Training	-4.73613	0.00527528	-0.394687
[Ach]Cl-Guaiacol (1 : 4)	313.15	330.2	0	0.18016	0.58442	4.43994	4.27675	3.28794	2.76351	0.94932	0.72817	0.00265	-4.4063	-4.41948	-4.41188	-4.37864	-4.44137							Testing	-4.36294	0.00524566	-0.329838
[Ach]Cl-Guaiacol (1 : 4)	313.15	438.8	0	0.18016	0.58442	4.43994	4.27675	3.28794	2.76351	0.94932	0.72817	0.00265	-4.1289	-4.13684	-4.14098	-4.11505	-4.11496							Testing	-4.09891	0.00522814	-0.451005
[Ach]Cl-Guaiacol (1 : 4)	313.15	531.5	0	0.18016	0.58442	4.43994	4.27675	3.28794	2.76351	0.94932	0.72817	0.00265	-3.9373	-3.93477	-3.95453	-3.94761	-3.89884							Training	-3.9481	0.00522719	-0.635721
[Ach]Cl-Guaiacol (1 : 4)	323.15	53	0	0.18016	0.58442	4.43994	4.27675	3.28794	2.76351	0.94932	0.72817	0.00265	-6.3771	-6.39397	-6.39974	-6.33167	-6.2698							Testing	-6.1671	0.00549631	-0.734529
[Ach]Cl-Guaiacol (1 : 4)	323.15	165.3	0	0.18016	0.58442	4.43994	4.27675	3.28794	2.76351	0.94932	0.72817	0.00265	-5.24	-5.25877	-5.24968	-5.25915	-5.35296							Testing	-5.24752	0.00541832	-0.0678598
[Ach]Cl-Guaiacol (1 : 4)	323.15	241.6	0	0.18016	0.58442	4.43994	4.27675	3.28794	2.76351	0.94932	0.72817	0.00265	-4.8536	-4.86613	-4.85555	-4.84433	-4.93066							Training	-4.81584	0.00537612	-0.27948
[Ach]Cl-Guaiacol (1 : 4)	323.15	339.3	0	0.18016	0.58442	4.43994	4.27675	3.28794	2.76351	0.94932	0.72817	0.00265	-4.519	-4.53225	-4.52551	-4.49686	-4.53419							Training	-4.45338	0.00533485	-0.189593
[Ach]Cl-Guaiacol (1 : 4)	323.15	437.4	0	0.18016	0.58442	4.43994	4.27675	3.28794	2.76351	0.94932	0.72817	0.00265	-4.2545	-4.27924	-4.28394	-4.25769	-4.23868							Training	-4.22853	0.00530783	-0.268322
[Ach]Cl-Guaiacol (1 : 4)	323.15	536	0	0.18016	0.58442	4.43994	4.27675	3.28794	2.76351	0.94932	0.72817	0.00265	-4.057	-4.06396	-4.08643	-4.07438	-4.00428							Training	-4.07652	0.00529523	-0.509056
[TBP]Br-Phenol (1 : 4)	313.15	234.5	0.03864	0.44244	0.26119	3.16577	5.8873	4.52008	2.34969	0.77516	0.69415	0	-3.537	-3.55548	-3.64651	-3.52432	-3.63472							Training	-3.51075	0.00521607	2.20013
[TBP]Br-Phenol (1 : 4)	313.15	463.6	0.03864	0.44244	0.26119	3.16577	5.8873	4.52008	2.34969	0.77516	0.69415	0	-2.9394	-2.87443	-2.92846	-2.82957	-2.88078							Testing	-2.79743	0.00512094	1.89416
[TBP]Br-Phenol (1 : 4)	313.15	737	0.03864	0.44244	0.26119	3.16577	5.8873	4.52008	2.34969	0.77516	0.69415	0	-2.3507	-2.34317	-2.385	-2.36986	-2.41861							Training	-2.34464	0.00511053	1.39832
[TBP]Br-Phenol (1 : 4)	313.15	932	0.03864	0.44244	0.26119	3.16577	5.8873	4.52008	2.34969	0.77516	0.69415	0	-2.0939	-2.06826	-2.1022	-2.11884	-2.18242							Testing	-2.07263	0.00517165	0.994211
[TBP]Br-Phenol (1 : 4)	313.15	1188.8	0.03864	0.44244	0.26119	3.16577	5.8873	4.52008	2.34969	0.77516	0.69415	0	-1.8496	-1.80887	-1.8226	-1.84572	-1.91491							Testing	-1.76012	0.00533923	1.35972
[TBP]Br-Phenol (1 : 4)	313.15	1578.5	0.03864	0.44244	0.26119	3.16577	5.8873	4.52008	2.34969	0.77516	0.69415	0	-1.5857	-1.56487	-1.55399	-1.529	-1.55709							Testing	-1.43472	0.00578262	1.66676
[TBP]Br-Phenol (1 : 4)	323.15	163.8	0.03864	0.44244	0.26119	3.16577	5.8873	4.52008	2.34969	0.77516	0.69415	0	-3.9739	-4.0447	-4.0943	-4.07201	-4.09853							Testing	-4.07927	0.00512892	2.67089
[TBP]Br-Phenol (1 : 4)	323.15	399	0.03864	0.44244	0.26119	3.16577	5.8873	4.52008	2.34969	0.77516	0.69415	0	-3.2189	-3.17521	-3.18542	-3.13128	-3.11115							Testing	-3.11023	0.00497919	2.13416
[TBP]Br-Phenol (1 : 4)	323.15	608.4	0.03864	0.44244	0.26119	3.16577	5.8873	4.52008	2.34969	0.77516	0.69415	0	-2.6897	-2.7075	-2.70626	-2.70731	-2.67574							Training	-2.70198	0.00491575	1.9618
[TBP]Br-Phenol (1 : 4)	323.15	786.9	0.03864	0.44244	0.26119	3.16577	5.8873	4.52008	2.34969	0.77516	0.69415	0	-2.3903	-2.39942	-2.39819	-2.43281	-2.41909							Testing	-2.42938	0.00491364	1.32534
[TBP]Br-Phenol (1 : 4)	323.15	1018.7	0.03864	0.44244	0.26119	3.16577	5.8873	4.52008	2.34969	0.77516	0.69415	0	-2.0899	-2.09826	-2.09334	-2.13644	-2.14734							Testing	-2.11111	0.00498229	1.18027
[TBP]Br-Phenol (1 : 4)	323.15	1241.2	0.03864	0.44244	0.26119	3.16577	5.8873	4.52008	2.34969	0.77516	0.69415	0	-1.8951	-1.89284	-1.8807	-1.89967	-1.91705							Training	-1.85261	0.00512405	1.52368
[TBP]Br-Phenol (1 : 4)	333.15	203.4	0.03864	0.44244	0.26119	3.16577	5.8873	4.52008	2.34969	0.77516	0.69415	0	-3.9954	-3.98315	-3.97085	-3.99929	-3.93488							Training	-4.0236	0.0051481	2.51243
[TBP]Br-Phenol (1 : 4)	333.15	481.2	0.03864	0.44244	0.26119	3.16577	5.8873	4.52008	2.34969	0.77516	0.69415	0	-3.1869	-3.11669	-3.06808	-3.09981	-2.98639							Training	-3.10367	0.00496335	2.14118
[TBP]Br-Phenol (1 : 4)	333.15	601.7	0.03864	0.44244	0.26119	3.16577	5.8873	4.52008	2.34969	0.77516	0.69415	0	-2.8387	-2.8595	-2.81024	-2.86713	-2.75827							Testing	-2.88348	0.00491923	2.02244
[TBP]Br-Phenol (1 : 4)	333.15	856	0.03864	0.44244	0.26119	3.16577	5.8873	4.52008	2.34969	0.77516	0.69415	0	-2.4236	-2.43195	-2.39229	-2.47055	-2.39938							Training	-2.49127	0.00489766	1.2558
[TBP]Br-Phenol (1 : 4)	333.15	1024.7	0.03864	0.44244	0.26119	3.16577	5.8873	4.52008	2.34969	0.77516	0.69415	0	-2.1568	-2.22144	-2.18792	-2.25084	-2.20302							Training	-2.25945	0.00493691	1.32704
[TBP]Br-Phenol (1 : 4)	333.15	1272.9	0.03864	0.44244	0.26119	3.16577	5.8873	4.52008	2.34969	0.77516	0.69415	0	-1.9449	-1.99448	-1.9745	-1.97577	-1.94168							Training	-1.97167	0.00507232	1.63012
[TBP]Br-DEG (1 : 4)	313.15	183.5	0	0.11608	0.72243	3.35281	8.6597	2.93296	0.73733	1.45512	1.60031	0	-3.7465	-3.72064	-3.7566	-3.68253	-3.70289							Testing	-3.74502	0.0041968	2.45092
[TBP]Br-DEG (1 : 4)	313.15	379.8	0	0.11608	0.72243	3.35281	8.6597	2.93296	0.73733	1.45512	1.60031	0	-3.0303	-2.97496	-3.00767	-2.88925	-2.90791							Testing	-2.97544	0.00409379	2.3806
[TBP]Br-DEG (1 : 4)	313.15	621.6	0	0.11608	0.72243	3.35281	8.6597	2.93296	0.73733	1.45512	1.60031	0	-2.4225	-2.43258	-2.43191	-2.39246	-2.37377							Training	-2.45187	0.00404641	2.16647
[TBP]Br-DEG (1 : 4)	313.15	892.3	0	0.11608	0.72243	3.35281	8.6597	2.93296	0.73733	1.45512	1.60031	0	-2.0212	-2.00367	-1.96973	-2.02988	-1.96311							Testing	-2.03745	0.00409749	1.44595
[TBP]Br-DEG (1 : 4)	313.15	1024.5	0	0.11608	0.72243	3.35281	8.6597	2.93296	0.73733	1.45512	1.60031	0	-1.8534	-1.84205	-1.8058	-1.88748	-1.789							Training	-1.87038	0.00416241	1.80286
[TBP]Br-DEG (1 : 4)	313.15	1398.1	0	0.11608	0.72243	3.35281	8.6597	2.93296	0.73733	1.45512	1.60031	0	-1.5498	-1.50061	-1.46114	-1.55579	-1.33839							Training	-1.48477	0.00448771	2.22275
[TBP]Br-DEG (1 : 4)	323.15	94.4	0	0.11608	0.72243	3.35281	8.6597	2.93296	0.73733	1.45512	1.60031	0	-4.3428	-4.48965	-4.56152	-4.50161	-4.41842							Training	-4.40172	0.0040069	3.23087
[TBP]Br-DEG (1 : 4)	323.15	270.7	0	0.11608	0.72243	3.35281	8.6597	2.93296	0.73733	1.45512	1.60031	0	-3.5649	-3.41629	-3.44248	-3.37636	-3.39699							Testing	-3.40009	0.00386703	2.34241
[TBP]Br-DEG (1 : 4)	323.15	464.2	0	0.11608	0.72243	3.35281	8.6597	2.93296	0.73733	1.45512	1.60031	0	-2.752	-2.85284	-2.86872	-2.78818	-2.80327							Training	-2.82619	0.00376722	2.95912
[TBP]Br-DEG (1 : 4)	323.15	700.8	0	0.11608	0.72243	3.35281	8.6597	2.93296	0.73733	1.45512	1.60031	0	-2.3289	-2.37788	-2.35944	-2.34998	-2.35267							Training	-2.37699	0.00372155	2.2613
[TBP]Br-DEG (1 : 4)	323.15	895.4	0	0.11608	0.72243	3.35281	8.6597	2.93296	0.73733	1.45512	1.60031	0	-2.0433	-2.08257	-2.05745	-2.08784	-2.06476							Testing	-2.08799	0.00374697	1.63686
[TBP]Br-DEG (1 : 4)	323.15	1148	0	0.11608	0.72243	3.35281	8.6597	2.93296	0.73733	1.45512	1.60031	0	-1.7856	-1.79262	-1.77362	-1.82106	-1.73367							Testing	-1.77712	0.00386475	2.03672
[TBP]Br-DEG (1 : 4)	333.15	164.8	0	0.11608	0.72243	3.35281	8.6597	2.93296	0.73733	1.45512	1.60031	0	-4.0804	-4.02348	-4.05719	-4.07929	-4.03761							Training	-4.00747	0.00386863	3.10268
[TBP]Br-DEG (1 : 4)	333.15	397.4	0	0.11608	0.72243	3.35281	8.6597	2.93296	0.73733	1.45512	1.60031	0	-3.1869	-3.11311	-3.12736	-3.0864	-3.09069							Testing	-3.07226	0.00369062	2.76038
[TBP]Br-DEG (1 : 4)	333.15	642.3	0	0.11608	0.72243	3.35281	8.6597	2.93296	0.73733	1.45512	1.60031	0	-2.5601	-2.57029	-2.55614	-2.54296	-2.56493							Testing	-2.5493	0.00359097	2.49003
[TBP]Br-DEG (1 : 4)	333.15	903.8	0	0.11608	0.72243	3.35281	8.6597	2.93296	0.73733	1.45512	1.60031	0	-2.1312	-2.1551	-2.14311	-2.1466	-2.163							Training	-2.14161	0.00358395	1.74121
[TBP]Br-DEG (1 : 4)	333.15	1103.6	0	0.11608	0.72243	3.35281	8.6597	2.93296	0.73733	1.45512	1.60031	0	-1.8878	-1.91832	-1.91769	-1.91754	-1.89465							Training	-1.88399	0.00364777	2.15737
[TBP]Br-DEG (1 : 4)	333.15	1396.5	0	0.11608	0.72243	3.35281	8.6597	2.93296	0.73733	1.45512	1.60031	0	-1.6327	-1.65759	-1.66327	-1.65598	-1.52971							Training	-1.56398	0.00384963	2.52694
[ATPP]Br-Phenol (1 : 4)	313.15	218.2	0.03864	0.44244	0.33124	3.87525	3.95697	5.02433	2.52818	0.739	0.60583	0.0118	-3.5066	-3.44499	-3.40023	-3.44116	-3.50177							Training	-3.44159	0.00724957	2.64577
[ATPP]Br-Phenol (1 : 4)	313.15	397.4	0.03864	0.44244	0.33124	3.87525	3.95697	5.02433	2.52818	0.739	0.60583	0.0118	-2.8002	-2.8767	-2.81127	-2.81567	-2.78924							Testing	-2.71356	0.00709213	2.93439
[ATPP]Br-Phenol (1 : 4)	313.15	631.6	0.03864	0.44244	0.33124	3.87525	3.95697	5.02433	2.52818	0.739	0.60583	0.0118	-2.3076	-2.37948	-2.3148	-2.3527	-2.30712							Testing	-2.27916	0.00695904	2.42825
[ATPP]Br-Phenol (1 : 4)	313.15	886.6	0.03864	0.44244	0.33124	3.87525	3.95697	5.02433	2.52818	0.739	0.60583	0.0118	-1.9477	-1.97598	-1.9435	-1.9891	-1.98007							Testing	-1.94255	0.00690775	1.60793
[ATPP]Br-Phenol (1 : 4)	313.15	1093.3	0.03864	0.44244	0.33124	3.87525	3.95697	5.02433	2.52818	0.739	0.60583	0.0118	-1.7254	-1.72655	-1.72658	-1.75008	-1.76725							Testing	-1.67514	0.0069378	1.96161
[ATPP]Br-Phenol (1 : 4)	313.15	1333.2	0.03864	0.44244	0.33124	3.87525	3.95697	5.02433	2.52818	0.739	0.60583	0.0118	-1.5446	-1.49201	-1.53992	-1.52138	-1.54612							Testing	-1.37844	0.00705309	2.19315
[ATPP]Br-Phenol (1 : 4)	323.15	231.4	0.03864	0.44244	0.33124	3.87525	3.95697	5.02433	2.52818	0.739	0.60583	0.0118	-3.3785	-3.49121	-3.48676	-3.52563	-3.55754							Training	-3.4791	0.00760412	3.29589
[ATPP]Br-Phenol (1 : 4)	323.15	415.3	0.03864	0.44244	0.33124	3.87525	3.95697	5.02433	2.52818	0.739	0.60583	0.0118	-3.0262	-2.93591	-2.90602	-2.91367	-2.86787							Testing	-2.78754	0.00742481	2.71787
[ATPP]Br-Phenol (1 : 4)	323.15	683.8	0.03864	0.44244	0.33124	3.87525	3.95697	5.02433	2.52818	0.739	0.60583	0.0118	-2.4361	-2.39302	-2.3656	-2.39369	-2.35246							Training	-2.33312	0.00725417	2.27699
[ATPP]Br-Phenol (1 : 4)	323.15	904.6	0.03864	0.44244	0.33124	3.87525	3.95697	5.02433	2.52818	0.739	0.60583	0.0118	-2.081	-2.06326	-2.05934	-2.07326	-2.0759							Testing	-2.05126	0.00719493	1.52943
[ATPP]Br-Phenol (1 : 4)	323.15	1125.7	0.03864	0.44244	0.33124	3.87525	3.95697	5.02433	2.52818	0.739	0.60583	0.0118	-1.8024	-1.81295	-1.83444	-1.80721	-1.84458							Testing	-1.77436	0.00720894	2.00236
[ATPP]Br-Phenol (1 : 4)	323.15	1325.9	0.03864	0.44244	0.33124	3.87525	3.95697	5.02433	2.52818	0.739	0.60583	0.0118	-1.6225	-1.63222	-1.68133	-1.60548	-1.65448							Testing	-1.53885	0.00728493	2.26285
[ATPP]Br-Phenol (1 : 4)	333.15	182.7	0.03864	0.44244	0.33124	3.87525	3.95697	5.02433	2.52818	0.739	0.60583	0.0118	-3.8971	-3.81115	-3.84467	-3.93613	-3.96927							Training	-3.90768	0.0082211	3.36546
[ATPP]Br-Phenol (1 : 4)	333.15	472.8	0.03864	0.44244	0.33124	3.87525	3.95697	5.02433	2.52818	0.739	0.60583	0.0118	-2.9375	-2.90469	-2.9031	-2.92798	-2.8588							Testing	-2.79423	0.00790538	2.95218
[ATPP]Br-Phenol (1 : 4)	333.15	664.5	0.03864	0.44244	0.33124	3.87525	3.95697	5.02433	2.52818	0.739	0.60583	0.0118	-2.5549	-2.52899	-2.52997	-2.55782	-2.50871							Testing	-2.49329	0.00776607	2.49012
[ATPP]Br-Phenol (1 : 4)	333.15	821.3	0.03864	0.44244	0.33124	3.87525	3.95697	5.02433	2.52818	0.739	0.60583	0.0118	-2.2692	-2.28158	-2.2956	-2.30774	-2.29657							Testing	-2.29202	0.00769313	2.04902
[ATPP]Br-Phenol (1 : 4)	333.15	1066.4	0.03864	0.44244	0.33124	3.87525	3.95697	5.02433	2.52818	0.739	0.60583	0.0118	-1.9562	-1.9847	-2.01954	-1.97633	-2.02053							Training	-1.9876	0.00765306	2.0122
[ATPP]Br-Phenol (1 : 4)	333.15	1345.1	0.03864	0.44244	0.33124	3.87525	3.95697	5.02433	2.52818	0.739	0.60583	0.0118	-1.7176	-1.74151	-1.80053	-1.67125	-1.74468							Training	-1.66733	0.00771705	2.35409
[ATPP]Br-DEG (1 : 4)	303.15	160	0	0.11608	0.79248	4.06229	6.72937	3.43721	0.91582	1.41896	1.51199	0.0118	-3.341	-3.26246	-3.42292	-3.2757	-3.40477							Testing	-3.62786	0.00282033	3.54789
[ATPP]Br-DEG (1 : 4)	303.15	340	0	0.11608	0.79248	4.06229	6.72937	3.43721	0.91582	1.41896	1.51199	0.0118	-2.5666	-2.52923	-2.60929	-2.53316	-2.55997							Training	-2.71988	0.00266664	3.66173
[ATPP]Br-DEG (1 : 4)	303.15	491	0	0.11608	0.79248	4.06229	6.72937	3.43721	0.91582	1.41896	1.51199	0.0118	-2.1768	-2.1795	-2.19562	-2.20085	-2.16596							Testing	-2.28931	0.00257522	3.39496
[ATPP]Br-DEG (1 : 4)	303.15	739	0	0.11608	0.79248	4.06229	6.72937	3.43721	0.91582	1.41896	1.51199	0.0118	-1.7493	-1.77421	-1.69415	-1.83319	-1.75888							Training	-1.79709	0.00249934	2.73033
[ATPP]Br-DEG (1 : 4)	303.15	870	0	0.11608	0.79248	4.06229	6.72937	3.43721	0.91582	1.41896	1.51199	0.0118	-1.5242	-1.6167	-1.48355	-1.68334	-1.59472							Training	-1.58463	0.00249653	2.69909
[ATPP]Br-TEG (1 : 4)	303.15	142	0	0	0.13388	5.75765	7.64889	3.62673	1.27866	1.41652	1.46711	0.02688	-3.3187	-3.30893	-3.27845	-3.33087	-3.3409							Testing	-3.42489	0.00665838	3.30921
[ATPP]Br-TEG (1 : 4)	303.15	333	0	0	0.13388	5.75765	7.64889	3.62673	1.27866	1.41652	1.46711	0.02688	-2.4569	-2.46135	-2.42456	-2.42337	-2.4304							Training	-2.4689	0.00668584	3.31392
[ATPP]Br-TEG (1 : 4)	303.15	490	0	0	0.13388	5.75765	7.64889	3.62673	1.27866	1.41652	1.46711	0.02688	-2.062	-2.06782	-2.03394	-2.03136	-2.02681							Training	-2.06114	0.00674942	3.12075
[ATPP]Br-TEG (1 : 4)	303.15	718	0	0	0.13388	5.75765	7.64889	3.62673	1.27866	1.41652	1.46711	0.02688	-1.6471	-1.63918	-1.64288	-1.63603	-1.65325							Training	-1.65726	0.00690764	2.46527
[ATPP]Br-TEG (1 : 4)	303.15	874	0	0	0.13388	5.75765	7.64889	3.62673	1.27866	1.41652	1.46711	0.02688	-1.4077	-1.41402	-1.45024	-1.42201	-1.45847							Training	-1.42782	0.00706085	2.43586
[ATPP]Br-TEG (1 : 4)	303.15	1070	0	0	0.13388	5.75765	7.64889	3.62673	1.27866	1.41652	1.46711	0.02688	-1.1957	-1.19788	-1.27002	-1.19489	-1.24377							Training	-1.17563	0.00730513	2.7808
[Ch]Cl-Phenol (1 : 4)	313.15	2360	0.03864	0.44244	0.55071	3.54545	2.67016	2.89038	2.45733	0.8214	0.74531	0.00076	-2.3592	-2.40978	-2.51107	-2.56388	-2.58802							Testing	-2.52079	0.00474855	-0.0953397
[Ch]Cl-Phenol (1 : 4)	313.15	4470	0.03864	0.44244	0.55071	3.54545	2.67016	2.89038	2.45733	0.8214	0.74531	0.00076	-1.974	-1.93985	-1.93333	-1.8007	-1.88047							Training	-1.84292	0.0128083	-0.832551
[TBA]Br-Hexanoic acid (1 : 4)	303.15	506	0.04256	0.41232	0.33474	2.24579	9.69019	5.02046	0.93453	1.51529	0.86457	0.00159	-2.9188	-2.96857	-2.9305	-2.90521	-3.07886							Testing	-2.96084	0.00478087	0.587699
[TBA]Br-Hexanoic acid (1 : 4)	303.15	623	0.04256	0.41232	0.33474	2.24579	9.69019	5.02046	0.93453	1.51529	0.86457	0.00159	-2.738	-2.77277	-2.73773	-2.74072	-2.87563							Testing	-2.76631	0.00470738	0.183503
[TBA]Br-Hexanoic acid (1 : 4)	303.15	826	0.04256	0.41232	0.33474	2.24579	9.69019	5.02046	0.93453	1.51529	0.86457	0.00159	-2.5183	-2.49829	-2.48361	-2.51477	-2.60974							Training	-2.50188	0.00462863	-0.657598
[TBA]Br-Hexanoic acid (1 : 4)	303.15	930	0.04256	0.41232	0.33474	2.24579	9.69019	5.02046	0.93453	1.51529	0.86457	0.00159	-2.3645	-2.38126	-2.37883	-2.41641	-2.49583							Testing	-2.38926	0.00461226	-0.405423
[TBA]Br-Hexanoic acid (1 : 4)	303.15	1035	0.04256	0.41232	0.33474	2.24579	9.69019	5.02046	0.93453	1.51529	0.86457	0.00159	-2.2926	-2.27556	-2.28351	-2.32583	-2.3894							Testing	-2.28691	0.00461219	-0.320852
[TBA]Br-Hexanoic acid (1 : 4)	303.15	1125	0.04256	0.41232	0.33474	2.24579	9.69019	5.02046	0.93453	1.51529	0.86457	0.00159	-2.2046	-2.19322	-2.20759	-2.25423	-2.30308							Training	-2.20661	0.0046253	-0.154333
[TBA]Br-Hexanoic acid (1 : 4)	303.15	1335	0.04256	0.41232	0.33474	2.24579	9.69019	5.02046	0.93453	1.51529	0.86457	0.00159	-2.0364	-2.02387	-2.04513	-2.10604	-2.11421							Training	-2.03959	0.00470319	0.0758864
[TBA]Br-Hexanoic acid (1 : 4)	313.15	521	0.04256	0.41232	0.33474	2.24579	9.69019	5.02046	0.93453	1.51529	0.86457	0.00159	-3.11	-3.1441	-3.12323	-3.08697	-3.19269							Testing	-3.11442	0.00497414	0.472256
[TBA]Br-Hexanoic acid (1 : 4)	313.15	627	0.04256	0.41232	0.33474	2.24579	9.69019	5.02046	0.93453	1.51529	0.86457	0.00159	-2.9096	-2.96799	-2.95598	-2.93211	-3.01052							Testing	-2.94455	0.00489638	0.190897
[TBA]Br-Hexanoic acid (1 : 4)	313.15	754	0.04256	0.41232	0.33474	2.24579	9.69019	5.02046	0.93453	1.51529	0.86457	0.00159	-2.8084	-2.78794	-2.78665	-2.77341	-2.83357							Training	-2.7751	0.00482541	-0.440903
[TBA]Br-Hexanoic acid (1 : 4)	313.15	829	0.04256	0.41232	0.33474	2.24579	9.69019	5.02046	0.93453	1.51529	0.86457	0.00159	-2.6722	-2.69417	-2.69758	-2.68874	-2.74208							Testing	-2.68694	0.00479487	-0.680218
[TBA]Br-Hexanoic acid (1 : 4)	313.15	911	0.04256	0.41232	0.33474	2.24579	9.69019	5.02046	0.93453	1.51529	0.86457	0.00159	-2.605	-2.60056	-2.607	-2.60206	-2.64931							Testing	-2.59825	0.00477114	-0.703482
[TBA]Br-Hexanoic acid (1 : 4)	313.15	990	0.04256	0.41232	0.33474	2.24579	9.69019	5.02046	0.93453	1.51529	0.86457	0.00159	-2.4925	-2.51798	-2.52519	-2.52359	-2.56518							Testing	-2.51907	0.00475783	-0.504471
[TBA]Br-Hexanoic acid (1 : 4)	313.15	1170	0.04256	0.41232	0.33474	2.24579	9.69019	5.02046	0.93453	1.51529	0.86457	0.00159	-2.3991	-2.35245	-2.35517	-2.36093	-2.38669							Training	-2.35659	0.00476249	-0.400635
[TBA]Br-Hexanoic acid (1 : 4)	323.15	457	0.04256	0.41232	0.33474	2.24579	9.69019	5.02046	0.93453	1.51529	0.86457	0.00159	-3.4802	-3.47132	-3.46674	-3.41251	-3.4747							Testing	-3.45245	0.00542814	0.497786
[TBA]Br-Hexanoic acid (1 : 4)	323.15	540	0.04256	0.41232	0.33474	2.24579	9.69019	5.02046	0.93453	1.51529	0.86457	0.00159	-3.3159	-3.31494	-3.31549	-3.26687	-3.30343							Training	-3.29968	0.00534789	0.337135
[TBA]Br-Hexanoic acid (1 : 4)	323.15	652	0.04256	0.41232	0.33474	2.24579	9.69019	5.02046	0.93453	1.51529	0.86457	0.00159	-3.1559	-3.13334	-3.13812	-3.099	-3.11722							Training	-3.12972	0.005256	-0.0884432
[TBA]Br-Hexanoic acid (1 : 4)	323.15	723	0.04256	0.41232	0.33474	2.24579	9.69019	5.02046	0.93453	1.51529	0.86457	0.00159	-3.0303	-3.0317	-3.03689	-3.00329	-3.01649							Testing	-3.03612	0.00520749	-0.331098
[TBA]Br-Hexanoic acid (1 : 4)	323.15	847	0.04256	0.41232	0.33474	2.24579	9.69019	5.02046	0.93453	1.51529	0.86457	0.00159	-2.9041	-2.87431	-2.87571	-2.84951	-2.86059							Testing	-2.89045	0.00514093	-0.911114
[TBA]Br-Hexanoic acid (1 : 4)	323.15	993	0.04256	0.41232	0.33474	2.24579	9.69019	5.02046	0.93453	1.51529	0.86457	0.00159	-2.7257	-2.71559	-2.70667	-2.68512	-2.6973							Training	-2.73971	0.00509215	-0.782231
[TBA]Br-Hexanoic acid (1 : 4)	323.15	1145	0.04256	0.41232	0.33474	2.24579	9.69019	5.02046	0.93453	1.51529	0.86457	0.00159	-2.5943	-2.57397	-2.55088	-2.53	-2.54121							Training	-2.59947	0.00507535	-0.592766
[TEA]Br-Hexanoic acid (1 : 4)	303.15	483	0.04256	0.41232	0.3374	2.6125	7.66124	3.67438	0.9424	1.51663	0.90101	0	-3.3298	-3.26498	-3.30965	-3.28987	-3.30357							Training	-3.24531	0.00480359	0.221815
[TEA]Br-Hexanoic acid (1 : 4)	303.15	578	0.04256	0.41232	0.3374	2.6125	7.66124	3.67438	0.9424	1.51663	0.90101	0	-3.1304	-3.0932	-3.12366	-3.13212	-3.11954							Training	-3.08115	0.00472992	0.0114128
[TEA]Br-Hexanoic acid (1 : 4)	303.15	661	0.04256	0.41232	0.3374	2.6125	7.66124	3.67438	0.9424	1.51663	0.90101	0	-3.0662	-2.9623	-2.98132	-3.01276	-2.98738							Testing	-2.96002	0.00467664	-0.459968
[TEA]Br-Hexanoic acid (1 : 4)	303.15	824	0.04256	0.41232	0.3374	2.6125	7.66124	3.67438	0.9424	1.51663	0.90101	0	-2.779	-2.74424	-2.74354	-2.8078	-2.77347							Testing	-2.76051	0.0046021	-0.941215
[TEA]Br-Hexanoic acid (1 : 4)	303.15	922	0.04256	0.41232	0.3374	2.6125	7.66124	3.67438	0.9424	1.51663	0.90101	0	-2.6766	-2.63305	-2.62219	-2.69754	-2.66224							Testing	-2.65786	0.00457649	-0.788273
[TEA]Br-Hexanoic acid (1 : 4)	303.15	1024	0.04256	0.41232	0.3374	2.6125	7.66124	3.67438	0.9424	1.51663	0.90101	0	-2.5639	-2.53007	-2.5101	-2.59097	-2.55482							Training	-2.56131	0.00456514	-0.58228
[TEA]Br-Hexanoic acid (1 : 4)	303.15	1263	0.04256	0.41232	0.3374	2.6125	7.66124	3.67438	0.9424	1.51663	0.90101	0	-2.3486	-2.32795	-2.29336	-2.36996	-2.32412							Testing	-2.36531	0.00459972	-0.294575
[TEA]Br-Hexanoic acid (1 : 4)	313.15	388	0.04256	0.41232	0.3374	2.6125	7.66124	3.67438	0.9424	1.51663	0.90101	0	-3.7091	-3.67415	-3.72269	-3.68964	-3.69051							Testing	-3.61127	0.0054203	0.404107
[TEA]Br-Hexanoic acid (1 : 4)	313.15	456	0.04256	0.41232	0.3374	2.6125	7.66124	3.67438	0.9424	1.51663	0.90101	0	-3.572	-3.52216	-3.56055	-3.53784	-3.51221							Testing	-3.45934	0.00534834	0.243412
[TEA]Br-Hexanoic acid (1 : 4)	313.15	585	0.04256	0.41232	0.3374	2.6125	7.66124	3.67438	0.9424	1.51663	0.90101	0	-3.3187	-3.28297	-3.30312	-3.30636	-3.25318							Training	-3.23494	0.0052309	-0.0420642
[TEA]Br-Hexanoic acid (1 : 4)	313.15	714	0.04256	0.41232	0.3374	2.6125	7.66124	3.67438	0.9424	1.51663	0.90101	0	-3.0989	-3.08645	-3.09038	-3.11446	-3.05545							Testing	-3.05866	0.00513845	-0.4754
[TEA]Br-Hexanoic acid (1 : 4)	313.15	856	0.04256	0.41232	0.3374	2.6125	7.66124	3.67438	0.9424	1.51663	0.90101	0	-2.8914	-2.90568	-2.89405	-2.92849	-2.87537							Testing	-2.89666	0.00506555	-0.990012
[TEA]Br-Hexanoic acid (1 : 4)	313.15	992	0.04256	0.41232	0.3374	2.6125	7.66124	3.67438	0.9424	1.51663	0.90101	0	-2.7426	-2.75974	-2.73548	-2.76794	-2.72321							Training	-2.76235	0.00502412	-0.729816
[TEA]Br-Hexanoic acid (1 : 4)	313.15	1161	0.04256	0.41232	0.3374	2.6125	7.66124	3.67438	0.9424	1.51663	0.90101	0	-2.5523	-2.60683	-2.57047	-2.58853	-2.55006							Testing	-2.6151	0.00501132	-0.442437
[TEA]Br-Hexanoic acid (1 : 4)	323.15	458	0.04256	0.41232	0.3374	2.6125	7.66124	3.67438	0.9424	1.51663	0.90101	0	-3.6889	-3.72363	-3.74825	-3.73351	-3.65844							Training	-3.64299	0.00605479	0.436162
[TEA]Br-Hexanoic acid (1 : 4)	323.15	553	0.04256	0.41232	0.3374	2.6125	7.66124	3.67438	0.9424	1.51663	0.90101	0	-3.4933	-3.54217	-3.55407	-3.55032	-3.46003							Testing	-3.47506	0.00595478	0.176593
[TEA]Br-Hexanoic acid (1 : 4)	323.15	626	0.04256	0.41232	0.3374	2.6125	7.66124	3.67438	0.9424	1.51663	0.90101	0	-3.3755	-3.42037	-3.42319	-3.42671	-3.33403							Training	-3.36674	0.00588713	-0.0286571
[TEA]Br-Hexanoic acid (1 : 4)	323.15	718	0.04256	0.41232	0.3374	2.6125	7.66124	3.67438	0.9424	1.51663	0.90101	0	-3.2315	-3.28381	-3.27602	-3.28446	-3.19664							Training	-3.24701	0.00581328	-0.348515
[TEA]Br-Hexanoic acid (1 : 4)	323.15	804	0.04256	0.41232	0.3374	2.6125	7.66124	3.67438	0.9424	1.51663	0.90101	0	-3.1055	-3.17042	-3.1535	-3.16135	-3.08275							Testing	-3.14715	0.00575573	-0.69069
[TEA]Br-Hexanoic acid (1 : 4)	323.15	947	0.04256	0.41232	0.3374	2.6125	7.66124	3.67438	0.9424	1.51663	0.90101	0	-2.9431	-3.00703	-2.97659	-2.97288	-2.91285							Testing	-2.99929	0.00568461	-0.936432
[TEA]Br-Hexanoic acid (1 : 4)	323.15	1114	0.04256	0.41232	0.3374	2.6125	7.66124	3.67438	0.9424	1.51663	0.90101	0	-2.8285	-2.84786	-2.80465	-2.77459	-2.73295							Training	-2.84663	0.00564041	-0.780749
Betain-1,2-propanediol (1 : 5)	308.15	190.8	0.000166667	0.304	0.787975	2.41784	4.06129	1.67713	0.754142	0.971342	1.12678	0.144625	-5.2591	-5.36893	-5.36213	-5.37954	-5.33806							Training	-5.31408	0.00367398	-0.660787
Betain-1,2-propanediol (1 : 5)	308.15	302.3	0.000166667	0.304	0.787975	2.41784	4.06129	1.67713	0.754142	0.971342	1.12678	0.144625	-4.8159	-4.85616	-4.83444	-4.83613	-4.80015							Training	-4.78598	0.00361649	-0.579743
Betain-1,2-propanediol (1 : 5)	308.15	404.3	0.000166667	0.304	0.787975	2.41784	4.06129	1.67713	0.754142	0.971342	1.12678	0.144625	-4.4918	-4.54257	-4.52185	-4.53032	-4.46703							Testing	-4.47349	0.00358025	-0.570768
Betain-1,2-propanediol (1 : 5)	308.15	506.5	0.000166667	0.304	0.787975	2.41784	4.06129	1.67713	0.754142	0.971342	1.12678	0.144625	-4.2687	-4.29382	-4.27891	-4.31123	-4.22185							Testing	-4.24605	0.00355959	-0.772769
Betain-1,2-propanediol (1 : 5)	308.15	606.5	0.000166667	0.304	0.787975	2.41784	4.06129	1.67713	0.754142	0.971342	1.12678	0.144625	-4.0628	-4.08748	-4.07938	-4.14077	-4.03321							Training	-4.06394	0.00355456	-0.982511
Betain-1,2-propanediol (1 : 5)	318.15	208	0.000166667	0.304	0.787975	2.41784	4.06129	1.67713	0.754142	0.971342	1.12678	0.144625	-5.4037	-5.41523	-5.40814	-5.40495	-5.39559							Training	-5.3939	0.00400128	-0.799782
Betain-1,2-propanediol (1 : 5)	318.15	317.5	0.000166667	0.304	0.787975	2.41784	4.06129	1.67713	0.754142	0.971342	1.12678	0.144625	-4.9762	-4.94704	-4.92922	-4.91566	-4.90296							Testing	-4.90352	0.00393436	-0.649519
Betain-1,2-propanediol (1 : 5)	318.15	424.8	0.000166667	0.304	0.787975	2.41784	4.06129	1.67713	0.754142	0.971342	1.12678	0.144625	-4.6052	-4.63083	-4.61591	-4.61215	-4.57323							Training	-4.58847	0.00388625	-0.518825
Betain-1,2-propanediol (1 : 5)	318.15	531.8	0.000166667	0.304	0.787975	2.41784	4.06129	1.67713	0.754142	0.971342	1.12678	0.144625	-4.3741	-4.37882	-4.37137	-4.39167	-4.33105							Testing	-4.35697	0.00385548	-0.761804
Betain-1,2-propanediol (1 : 5)	318.15	637	0.000166667	0.304	0.787975	2.41784	4.06129	1.67713	0.754142	0.971342	1.12678	0.144625	-4.1669	-4.1683	-4.16891	-4.21603	-4.14203							Testing	-4.16765	0.00384198	-1.02177
Betain-1,2-propanediol (1 : 5)	328.15	211.3	0.000166667	0.304	0.787975	2.41784	4.06129	1.67713	0.754142	0.971342	1.12678	0.144625	-5.5468	-5.54284	-5.52466	-5.5188	-5.53503							Training	-5.53758	0.00452334	-0.686619
Betain-1,2-propanediol (1 : 5)	328.15	332.3	0.000166667	0.304	0.787975	2.41784	4.06129	1.67713	0.754142	0.971342	1.12678	0.144625	-5.0832	-5.0419	-5.01477	-5.0008	-5.01156							Training	-5.00735	0.00443654	-0.543107
Betain-1,2-propanediol (1 : 5)	328.15	444.3	0.000166667	0.304	0.787975	2.41784	4.06129	1.67713	0.754142	0.971342	1.12678	0.144625	-4.7105	-4.72362	-4.70214	-4.69889	-4.68628							Testing	-4.69012	0.00437578	-0.492563
Betain-1,2-propanediol (1 : 5)	328.15	556.3	0.000166667	0.304	0.787975	2.41784	4.06129	1.67713	0.754142	0.971342	1.12678	0.144625	-4.4654	-4.46718	-4.45569	-4.47458	-4.44564							Testing	-4.45315	0.00433385	-0.712527
Betain-1,2-propanediol (1 : 5)	328.15	666.5	0.000166667	0.304	0.787975	2.41784	4.06129	1.67713	0.754142	0.971342	1.12678	0.144625	-4.2545	-4.2527	-4.25121	-4.2927	-4.25578							Testing	-4.25699	0.00431097	-0.9991
Betain-1,2-propanediol (1 : 5)	338.15	213.5	0.000166667	0.304	0.787975	2.41784	4.06129	1.67713	0.754142	0.971342	1.12678	0.144625	-5.684	-5.67704	-5.64786	-5.64088	-5.68117							Testing	-5.67613	0.00523301	-0.565167
Betain-1,2-propanediol (1 : 5)	338.15	338.8	0.000166667	0.304	0.787975	2.41784	4.06129	1.67713	0.754142	0.971342	1.12678	0.144625	-5.185	-5.16545	-5.12917	-5.11574	-5.1514							Testing	-5.12893	0.00512892	-0.416779
Betain-1,2-propanediol (1 : 5)	338.15	463.5	0.000166667	0.304	0.787975	2.41784	4.06129	1.67713	0.754142	0.971342	1.12678	0.144625	-4.8036	-4.8188	-4.79143	-4.78841	-4.80368							Testing	-4.78219	0.00504873	-0.410163
Betain-1,2-propanediol (1 : 5)	338.15	573.3	0.000166667	0.304	0.787975	2.41784	4.06129	1.67713	0.754142	0.971342	1.12678	0.144625	-4.5564	-4.57244	-4.55698	-4.57161	-4.57725							Testing	-4.55317	0.00499745	-0.609778
Betain-1,2-propanediol (1 : 5)	338.15	687.3	0.000166667	0.304	0.787975	2.41784	4.06129	1.67713	0.754142	0.971342	1.12678	0.144625	-4.3428	-4.35404	-4.35066	-4.38249	-4.38582							Training	-4.35111	0.00496335	-0.898537
Betain-1,2-propanediol (1 : 5)	348.15	215	0.000166667	0.304	0.787975	2.41784	4.06129	1.67713	0.754142	0.971342	1.12678	0.144625	-5.843	-5.81554	-5.77732	-5.76872	-5.83135							Training	-5.81407	0.00613025	-0.432069
Betain-1,2-propanediol (1 : 5)	348.15	344.5	0.000166667	0.304	0.787975	2.41784	4.06129	1.67713	0.754142	0.971342	1.12678	0.144625	-5.2785	-5.29231	-5.24882	-5.23506	-5.29503							Training	-5.24905	0.00600785	-0.208473
Betain-1,2-propanediol (1 : 5)	348.15	482	0.000166667	0.304	0.787975	2.41784	4.06129	1.67713	0.754142	0.971342	1.12678	0.144625	-4.8796	-4.91711	-4.88628	-4.88135	-4.92583							Training	-4.87273	0.00590545	-0.25222
Betain-1,2-propanediol (1 : 5)	348.15	593.5	0.000166667	0.304	0.787975	2.41784	4.06129	1.67713	0.754142	0.971342	1.12678	0.144625	-4.6356	-4.67199	-4.65539	-4.66353	-4.70522							Training	-4.64404	0.00584324	-0.475599
Betain-1,2-propanediol (1 : 5)	348.15	729	0.000166667	0.304	0.787975	2.41784	4.06129	1.67713	0.754142	0.971342	1.12678	0.144625	-4.4063	-4.42032	-4.41973	-4.43979	-4.48656							Training	-4.40873	0.00579277	-0.905996
[Ch]Cl-Guaiacol (1 : 5)	293.15	52.8	0	0.186916	0.540884	4.25687	3.74588	3.27892	2.80102	0.833182	0.641489	0.000646	-6.0323	-6.05228	-6.07246	-6.06684	-5.92642							Training	-6.02946	0.00486317	-1.36945
[Ch]Cl-Guaiacol (1 : 5)	293.15	139.8	0	0.186916	0.540884	4.25687	3.74588	3.27892	2.80102	0.833182	0.641489	0.000646	-5.1328	-5.11193	-5.12813	-5.13828	-5.17635							Training	-5.25704	0.00482899	-0.798713
[Ch]Cl-Guaiacol (1 : 5)	293.15	246.1	0	0.186916	0.540884	4.25687	3.74588	3.27892	2.80102	0.833182	0.641489	0.000646	-4.5282	-4.52771	-4.54078	-4.50711	-4.56974							Testing	-4.58737	0.00480265	-0.824983
[Ch]Cl-Guaiacol (1 : 5)	293.15	331.1	0	0.186916	0.540884	4.25687	3.74588	3.27892	2.80102	0.833182	0.641489	0.000646	-4.2336	-4.23799	-4.24996	-4.20454	-4.23659							Testing	-4.24393	0.00479379	-0.740214
[Ch]Cl-Guaiacol (1 : 5)	293.15	419.5	0	0.186916	0.540884	4.25687	3.74588	3.27892	2.80102	0.833182	0.641489	0.000646	-3.99	-4.00595	-4.02071	-3.98644	-3.97837							Testing	-4.00678	0.00479608	-0.797589
[Ch]Cl-Guaiacol (1 : 5)	293.15	528.4	0	0.186916	0.540884	4.25687	3.74588	3.27892	2.80102	0.833182	0.641489	0.000646	-3.7593	-3.76858	-3.79204	-3.789	-3.73701							Testing	-3.80907	0.00481503	-1.02912
[Ch]Cl-Guaiacol (1 : 5)	303.15	46.9	0	0.186916	0.540884	4.25687	3.74588	3.27892	2.80102	0.833182	0.641489	0.000646	-6.3771	-6.29525	-6.30818	-6.28356	-6.1506							Training	-6.19956	0.00471032	-1.56864
[Ch]Cl-Guaiacol (1 : 5)	303.15	145.2	0	0.186916	0.540884	4.25687	3.74588	3.27892	2.80102	0.833182	0.641489	0.000646	-5.2591	-5.22496	-5.23273	-5.24399	-5.30392							Training	-5.33902	0.00465989	-0.683387
[Ch]Cl-Guaiacol (1 : 5)	303.15	239.4	0	0.186916	0.540884	4.25687	3.74588	3.27892	2.80102	0.833182	0.641489	0.000646	-4.733	-4.7091	-4.71392	-4.68887	-4.76582							Training	-4.7556	0.00462516	-0.799007
[Ch]Cl-Guaiacol (1 : 5)	303.15	330.4	0	0.186916	0.540884	4.25687	3.74588	3.27892	2.80102	0.833182	0.641489	0.000646	-4.4063	-4.39408	-4.39789	-4.35749	-4.40175							Training	-4.39098	0.00460427	-0.679709
[Ch]Cl-Guaiacol (1 : 5)	303.15	431.8	0	0.186916	0.540884	4.25687	3.74588	3.27892	2.80102	0.833182	0.641489	0.000646	-4.1289	-4.13048	-4.13872	-4.10792	-4.1065							Training	-4.13527	0.00459563	-0.751623
[Ch]Cl-Guaiacol (1 : 5)	303.15	538.9	0	0.186916	0.540884	4.25687	3.74588	3.27892	2.80102	0.833182	0.641489	0.000646	-3.912	-3.90002	-3.91874	-3.91383	-3.87077							Training	-3.95751	0.00460326	-1.0075
[Ch]Cl-Guaiacol (1 : 5)	313.15	55.3	0	0.186916	0.540884	4.25687	3.74588	3.27892	2.80102	0.833182	0.641489	0.000646	-6.2659	-6.31758	-6.32021	-6.30825	-6.21778							Training	-6.21689	0.00473623	-0.945424
[Ch]Cl-Guaiacol (1 : 5)	313.15	140.7	0	0.186916	0.540884	4.25687	3.74588	3.27892	2.80102	0.833182	0.641489	0.000646	-5.4037	-5.41103	-5.40931	-5.43319	-5.49356							Training	-5.48267	0.00468243	-0.434263
[Ch]Cl-Guaiacol (1 : 5)	313.15	235.9	0	0.186916	0.540884	4.25687	3.74588	3.27892	2.80102	0.833182	0.641489	0.000646	-4.8796	-4.87745	-4.87255	-4.86325	-4.94118							Training	-4.89419	0.00463535	-0.678523
[Ch]Cl-Guaiacol (1 : 5)	313.15	331.8	0	0.186916	0.540884	4.25687	3.74588	3.27892	2.80102	0.833182	0.641489	0.000646	-4.5375	-4.54381	-4.53808	-4.51059	-4.55407							Testing	-4.51809	0.00460169	-0.582962
[Ch]Cl-Guaiacol (1 : 5)	313.15	434.8	0	0.186916	0.540884	4.25687	3.74588	3.27892	2.80102	0.833182	0.641489	0.000646	-4.2545	-4.27683	-4.2766	-4.2548	-4.25281							Training	-4.27079	0.00458091	-0.628141
[Ch]Cl-Guaiacol (1 : 5)	313.15	536.4	0	0.186916	0.540884	4.25687	3.74588	3.27892	2.80102	0.833182	0.641489	0.000646	-4.0456	-4.05732	-4.06845	-4.06558	-4.02536							Testing	-4.11101	0.00457601	-0.882437
[Ch]Cl-Guaiacol (1 : 5)	323.15	48.5	0	0.186916	0.540884	4.25687	3.74588	3.27892	2.80102	0.833182	0.641489	0.000646	-6.5023	-6.57153	-6.56481	-6.54665	-6.43631							Testing	-6.36828	0.00495994	-0.891028
[Ch]Cl-Guaiacol (1 : 5)	323.15	146.3	0	0.186916	0.540884	4.25687	3.74588	3.27892	2.80102	0.833182	0.641489	0.000646	-5.5215	-5.5223	-5.50982	-5.55098	-5.60749							Training	-5.53809	0.00488651	-0.302417
[Ch]Cl-Guaiacol (1 : 5)	323.15	237.5	0	0.186916	0.540884	4.25687	3.74588	3.27892	2.80102	0.833182	0.641489	0.000646	-5.036	-5.02405	-5.00828	-5.02015	-5.08722							Training	-4.99324	0.00483098	-0.617817
[Ch]Cl-Guaiacol (1 : 5)	323.15	334.9	0	0.186916	0.540884	4.25687	3.74588	3.27892	2.80102	0.833182	0.641489	0.000646	-4.667	-4.68832	-4.67204	-4.66431	-4.69611							Training	-4.6252	0.00478546	-0.44444
[Ch]Cl-Guaiacol (1 : 5)	323.15	432	0	0.186916	0.540884	4.25687	3.74588	3.27892	2.80102	0.833182	0.641489	0.000646	-4.4228	-4.43649	-4.42619	-4.41966	-4.40999							Testing	-4.4008	0.00475425	-0.58885
[Ch]Cl-Guaiacol (1 : 5)	323.15	529.2	0	0.186916	0.540884	4.25687	3.74588	3.27892	2.80102	0.833182	0.641489	0.000646	-4.2131	-4.22407	-4.2257	-4.23159	-4.18674							Training	-4.25234	0.00473719	-0.765829
DiethylammoniumCl-Guaiacol (1 : 5)	293.15	48.8	0.130058	0.363793	0.368768	4.0602	3.88938	3.36641	2.6897	0.578385	0.817702	0.105009	-5.9522	-5.9383	-5.8924	-5.91292	-5.84907							Training	-5.83375	0.00864423	-0.949237
DiethylammoniumCl-Guaiacol (1 : 5)	293.15	131.9	0.130058	0.363793	0.368768	4.0602	3.88938	3.36641	2.6897	0.578385	0.817702	0.105009	-4.9477	-4.97762	-4.97276	-5.01281	-5.07972							Training	-5.08326	0.00862286	-0.060482
DiethylammoniumCl-Guaiacol (1 : 5)	293.15	245.3	0.130058	0.363793	0.368768	4.0602	3.88938	3.36641	2.6897	0.578385	0.817702	0.105009	-4.3505	-4.32994	-4.33951	-4.33891	-4.39888							Training	-4.35265	0.00861043	-0.217711
DiethylammoniumCl-Guaiacol (1 : 5)	293.15	326.5	0.130058	0.363793	0.368768	4.0602	3.88938	3.36641	2.6897	0.578385	0.817702	0.105009	-4.0628	-4.04992	-4.06369	-4.05521	-4.07407							Testing	-4.01754	0.00861339	-0.153853
DiethylammoniumCl-Guaiacol (1 : 5)	293.15	419.2	0.130058	0.363793	0.368768	4.0602	3.88938	3.36641	2.6897	0.578385	0.817702	0.105009	-3.8077	-3.80222	-3.82649	-3.8316	-3.80448							Testing	-3.76149	0.00862887	-0.214828
DiethylammoniumCl-Guaiacol (1 : 5)	293.15	522.3	0.130058	0.363793	0.368768	4.0602	3.88938	3.36641	2.6897	0.578385	0.817702	0.105009	-3.5936	-3.56913	-3.61511	-3.64963	-3.58434							Testing	-3.56612	0.00866123	-0.444024
DiethylammoniumCl-Guaiacol (1 : 5)	303.15	57	0.130058	0.363793	0.368768	4.0602	3.88938	3.36641	2.6897	0.578385	0.817702	0.105009	-5.9145	-5.95198	-5.93895	-5.93213	-5.87492							Training	-5.89555	0.00860348	-0.496227
DiethylammoniumCl-Guaiacol (1 : 5)	303.15	148.3	0.130058	0.363793	0.368768	4.0602	3.88938	3.36641	2.6897	0.578385	0.817702	0.105009	-5.0056	-4.99552	-5.01096	-5.02192	-5.08136							Testing	-5.10382	0.00857075	-0.016491
DiethylammoniumCl-Guaiacol (1 : 5)	303.15	244.9	0.130058	0.363793	0.368768	4.0602	3.88938	3.36641	2.6897	0.578385	0.817702	0.105009	-4.4918	-4.47711	-4.49182	-4.47574	-4.52584							Testing	-4.50764	0.00854975	-0.140776
DiethylammoniumCl-Guaiacol (1 : 5)	303.15	341.2	0.130058	0.363793	0.368768	4.0602	3.88938	3.36641	2.6897	0.578385	0.817702	0.105009	-4.1605	-4.15367	-4.16411	-4.14475	-4.15098							Training	-4.12623	0.00854275	-0.0148129
DiethylammoniumCl-Guaiacol (1 : 5)	303.15	424.4	0.130058	0.363793	0.368768	4.0602	3.88938	3.36641	2.6897	0.578385	0.817702	0.105009	-3.9425	-3.93684	-3.95084	-3.94688	-3.91675							Training	-3.90863	0.00854791	-0.096542
DiethylammoniumCl-Guaiacol (1 : 5)	303.15	520.1	0.130058	0.363793	0.368768	4.0602	3.88938	3.36641	2.6897	0.578385	0.817702	0.105009	-3.7423	-3.72106	-3.74967	-3.77313	-3.71183							Training	-3.72958	0.0085667	-0.310077
DiethylammoniumCl-Guaiacol (1 : 5)	313.15	58.8	0.130058	0.363793	0.368768	4.0602	3.88938	3.36641	2.6897	0.578385	0.817702	0.105009	-6.0323	-6.06531	-6.06256	-6.03089	-5.976							Training	-6.01546	0.00875169	-0.296416
DiethylammoniumCl-Guaiacol (1 : 5)	313.15	156	0.130058	0.363793	0.368768	4.0602	3.88938	3.36641	2.6897	0.578385	0.817702	0.105009	-5.0832	-5.08442	-5.09933	-5.0976	-5.15495							Testing	-5.18918	0.00870588	0.169129
DiethylammoniumCl-Guaiacol (1 : 5)	313.15	273.6	0.130058	0.363793	0.368768	4.0602	3.88938	3.36641	2.6897	0.578385	0.817702	0.105009	-4.519	-4.51323	-4.51479	-4.49251	-4.52918							Training	-4.52183	0.00866943	0.0647313
DiethylammoniumCl-Guaiacol (1 : 5)	313.15	336.3	0.130058	0.363793	0.368768	4.0602	3.88938	3.36641	2.6897	0.578385	0.817702	0.105009	-4.32	-4.31356	-4.30847	-4.28772	-4.29718							Training	-4.28995	0.00865848	0.085218
DiethylammoniumCl-Guaiacol (1 : 5)	313.15	428.6	0.130058	0.363793	0.368768	4.0602	3.88938	3.36641	2.6897	0.578385	0.817702	0.105009	-4.0745	-4.07319	-4.06738	-4.06337	-4.03606							Testing	-4.04882	0.00865309	-0.0327965
DiethylammoniumCl-Guaiacol (1 : 5)	313.15	550.7	0.130058	0.363793	0.368768	4.0602	3.88938	3.36641	2.6897	0.578385	0.817702	0.105009	-3.8213	-3.80359	-3.81499	-3.84397	-3.78386							Testing	-3.83051	0.00866562	-0.305055
DiethylammoniumCl-Guaiacol (1 : 5)	323.15	59.9	0.130058	0.363793	0.368768	4.0602	3.88938	3.36641	2.6897	0.578385	0.817702	0.105009	-6.2146	-6.18819	-6.1811	-6.13433	-6.0889							Testing	-6.13476	0.00908729	-0.267875
DiethylammoniumCl-Guaiacol (1 : 5)	323.15	193.1	0.130058	0.363793	0.368768	4.0602	3.88938	3.36641	2.6897	0.578385	0.817702	0.105009	-4.9908	-5.00385	-5.00151	-4.99358	-5.05601							Training	-5.07442	0.00901238	0.274608
DiethylammoniumCl-Guaiacol (1 : 5)	323.15	253.3	0.130058	0.363793	0.368768	4.0602	3.88938	3.36641	2.6897	0.578385	0.817702	0.105009	-4.733	-4.7323	-4.71865	-4.7028	-4.7508							Testing	-4.74846	0.00898726	0.107634
DiethylammoniumCl-Guaiacol (1 : 5)	323.15	333.8	0.130058	0.363793	0.368768	4.0602	3.88938	3.36641	2.6897	0.578385	0.817702	0.105009	-4.4482	-4.46566	-4.43923	-4.42382	-4.43995							Testing	-4.43412	0.00896217	0.201351
DiethylammoniumCl-Guaiacol (1 : 5)	323.15	431.5	0.130058	0.363793	0.368768	4.0602	3.88938	3.36641	2.6897	0.578385	0.817702	0.105009	-4.1865	-4.21187	-4.18184	-4.18245	-4.16292							Training	-4.17833	0.00894479	0.159551
DiethylammoniumCl-Guaiacol (1 : 5)	323.15	535.8	0.130058	0.363793	0.368768	4.0602	3.88938	3.36641	2.6897	0.578385	0.817702	0.105009	-3.9633	-3.9802	-3.96248	-3.98772	-3.94278							Testing	-3.98744	0.00894205	-0.0960548
[Ach]Cl-Guaiacol (1 : 5)	293.15	49.3	0	0.186916	0.5404	4.3176	4.21623	3.37952	2.83507	0.91145	0.623452	0.0022525	-6.0748	-6.01015	-6.00538	-6.03388	-5.86354							Testing	-5.90819	0.00599461	-1.531
[Ach]Cl-Guaiacol (1 : 5)	293.15	137.3	0	0.186916	0.5404	4.3176	4.21623	3.37952	2.83507	0.91145	0.623452	0.0022525	-5.036	-5.00383	-4.99077	-5.05967	-5.08855							Training	-5.12452	0.00596195	-0.64278
[Ach]Cl-Guaiacol (1 : 5)	293.15	230	0	0.186916	0.5404	4.3176	4.21623	3.37952	2.83507	0.91145	0.623452	0.0022525	-4.4918	-4.45552	-4.44652	-4.47622	-4.53471							Testing	-4.52258	0.00594012	-0.750805
[Ach]Cl-Guaiacol (1 : 5)	293.15	325.5	0	0.186916	0.5404	4.3176	4.21623	3.37952	2.83507	0.91145	0.623452	0.0022525	-4.1352	-4.11054	-4.1098	-4.11809	-4.13977							Training	-4.11974	0.00593113	-0.571491
[Ach]Cl-Guaiacol (1 : 5)	293.15	421.7	0	0.186916	0.5404	4.3176	4.21623	3.37952	2.83507	0.91145	0.623452	0.0022525	-3.8728	-3.85546	-3.86768	-3.8831	-3.85273							Training	-3.86305	0.0059359	-0.641548
[Ach]Cl-Guaiacol (1 : 5)	293.15	522.2	0	0.186916	0.5404	4.3176	4.21623	3.37952	2.83507	0.91145	0.623452	0.0022525	-3.6691	-3.63549	-3.66535	-3.70614	-3.62513							Training	-3.68325	0.00595573	-0.881259
[Ach]Cl-Guaiacol (1 : 5)	303.15	52	0	0.186916	0.5404	4.3176	4.21623	3.37952	2.83507	0.91145	0.623452	0.0022525	-6.0748	-6.11303	-6.10493	-6.11204	-5.98428							Training	-5.98228	0.0058406	-1.06275
[Ach]Cl-Guaiacol (1 : 5)	303.15	138.8	0	0.186916	0.5404	4.3176	4.21623	3.37952	2.83507	0.91145	0.623452	0.0022525	-5.1328	-5.13974	-5.12378	-5.17854	-5.23156							Testing	-5.22382	0.00579826	-0.416266
[Ach]Cl-Guaiacol (1 : 5)	303.15	222.9	0	0.186916	0.5404	4.3176	4.21623	3.37952	2.83507	0.91145	0.623452	0.0022525	-4.6565	-4.63627	-4.62362	-4.64608	-4.72489							Training	-4.68144	0.00576802	-0.625659
[Ach]Cl-Guaiacol (1 : 5)	303.15	333.2	0	0.186916	0.5404	4.3176	4.21623	3.37952	2.83507	0.91145	0.623452	0.0022525	-4.2475	-4.23668	-4.23378	-4.22999	-4.26616							Training	-4.2277	0.00574446	-0.450296
[Ach]Cl-Guaiacol (1 : 5)	303.15	428	0	0.186916	0.5404	4.3176	4.21623	3.37952	2.83507	0.91145	0.623452	0.0022525	-3.9954	-3.98918	-4.00008	-4.00079	-3.98578							Training	-3.9921	0.0057388	-0.534658
[Ach]Cl-Guaiacol (1 : 5)	303.15	528.2	0	0.186916	0.5404	4.3176	4.21623	3.37952	2.83507	0.91145	0.623452	0.0022525	-3.7898	-3.77109	-3.80099	-3.82208	-3.75719							Training	-3.82547	0.00574748	-0.767724
[Ach]Cl-Guaiacol (1 : 5)	313.15	49.9	0	0.186916	0.5404	4.3176	4.21623	3.37952	2.83507	0.91145	0.623452	0.0022525	-6.3771	-6.2911	-6.28026	-6.26743	-6.14654							Testing	-6.09343	0.00587654	-1.24122
[Ach]Cl-Guaiacol (1 : 5)	313.15	145	0	0.186916	0.5404	4.3176	4.21623	3.37952	2.83507	0.91145	0.623452	0.0022525	-5.2214	-5.23901	-5.21932	-5.26957	-5.3319							Training	-5.27925	0.00581905	-0.197796
[Ach]Cl-Guaiacol (1 : 5)	313.15	237	0	0.186916	0.5404	4.3176	4.21623	3.37952	2.83507	0.91145	0.623452	0.0022525	-4.733	-4.72151	-4.70563	-4.72277	-4.79936							Testing	-4.72182	0.00577635	-0.492544
[Ach]Cl-Guaiacol (1 : 5)	313.15	335.1	0	0.186916	0.5404	4.3176	4.21623	3.37952	2.83507	0.91145	0.623452	0.0022525	-4.3901	-4.37918	-4.37246	-4.36643	-4.40109							Testing	-4.34551	0.00574481	-0.387995
[Ach]Cl-Guaiacol (1 : 5)	313.15	432.8	0	0.186916	0.5404	4.3176	4.21623	3.37952	2.83507	0.91145	0.623452	0.0022525	-4.1289	-4.12565	-4.13401	-4.12867	-4.11066							Training	-4.11573	0.00572776	-0.442775
[Ach]Cl-Guaiacol (1 : 5)	313.15	526.5	0	0.186916	0.5404	4.3176	4.21623	3.37952	2.83507	0.91145	0.623452	0.0022525	-3.9373	-3.92149	-3.94878	-3.95721	-3.89276							Training	-3.96895	0.00572487	-0.662289
[Ach]Cl-Guaiacol (1 : 5)	323.15	48.6	0	0.186916	0.5404	4.3176	4.21623	3.37952	2.83507	0.91145	0.623452	0.0022525	-6.4378	-6.45534	-6.44112	-6.41975	-6.28842							Testing	-6.18778	0.00609972	-0.858618
[Ach]Cl-Guaiacol (1 : 5)	323.15	144.3	0	0.186916	0.5404	4.3176	4.21623	3.37952	2.83507	0.91145	0.623452	0.0022525	-5.3391	-5.38969	-5.36568	-5.42312	-5.46839							Testing	-5.37704	0.00603025	0.010116
[Ach]Cl-Guaiacol (1 : 5)	323.15	238.7	0	0.186916	0.5404	4.3176	4.21623	3.37952	2.83507	0.91145	0.623452	0.0022525	-4.8536	-4.86086	-4.84034	-4.86657	-4.92253							Testing	-4.81668	0.00597519	-0.350747
[Ach]Cl-Guaiacol (1 : 5)	323.15	341.3	0	0.186916	0.5404	4.3176	4.21623	3.37952	2.83507	0.91145	0.623452	0.0022525	-4.4918	-4.50823	-4.4976	-4.49809	-4.50851							Testing	-4.44073	0.00593052	-0.234053
[Ach]Cl-Guaiacol (1 : 5)	323.15	436.2	0	0.186916	0.5404	4.3176	4.21623	3.37952	2.83507	0.91145	0.623452	0.0022525	-4.2267	-4.26444	-4.26931	-4.26666	-4.22624							Testing	-4.23082	0.00590326	-0.287329
[Ach]Cl-Guaiacol (1 : 5)	323.15	535.8	0	0.186916	0.5404	4.3176	4.21623	3.37952	2.83507	0.91145	0.623452	0.0022525	-4.023	-4.04863	-4.07495	-4.0814	-3.99255							Testing	-4.08532	0.0058892	-0.516004
ChCl-FA (1 : 5)	303.15	77.3	0	0.232815	0.80553	3.82884	2.76399	2.65082	1.94998	0.892277	1.02931	0.000646	-5.7764	-5.75141	-5.83031	-5.80393	-5.79753							Testing	-5.78825	0.00295408	-0.138784
ChCl-FA (1 : 5)	303.15	210.2	0	0.232815	0.80553	3.82884	2.76399	2.65082	1.94998	0.892277	1.02931	0.000646	-4.7677	-4.72981	-4.80876	-4.77066	-4.81164							Testing	-4.80455	0.00279902	-0.0821199
ChCl-FA (1 : 5)	303.15	316.5	0	0.232815	0.80553	3.82884	2.76399	2.65082	1.94998	0.892277	1.02931	0.000646	-4.382	-4.32756	-4.37989	-4.34126	-4.33715							Testing	-4.33586	0.00269408	0.0639386
ChCl-FA (1 : 5)	303.15	414.7	0	0.232815	0.80553	3.82884	2.76399	2.65082	1.94998	0.892277	1.02931	0.000646	-4.0923	-4.06638	-4.09392	-4.08153	-4.03679							Testing	-4.06764	0.00261221	0.0444648
ChCl-FA (1 : 5)	303.15	516.3	0	0.232815	0.80553	3.82884	2.76399	2.65082	1.94998	0.892277	1.02931	0.000646	-3.8776	-3.8476	-3.85414	-3.88129	-3.80878							Training	-3.87894	0.00254274	-0.139596
ChCl-FA (1 : 5)	303.15	577.4	0	0.232815	0.80553	3.82884	2.76399	2.65082	1.94998	0.892277	1.02931	0.000646	-3.755	-3.73241	-3.72819	-3.78002	-3.69761							Testing	-3.7877	0.00250842	-0.318538
ChCl-FA (1 : 5)	313.15	70.9	0	0.232815	0.80553	3.82884	2.76399	2.65082	1.94998	0.892277	1.02931	0.000646	-5.9915	-5.98116	-6.0384	-6.01917	-6.01539							Training	-5.9821	0.00326271	0.0115014
ChCl-FA (1 : 5)	313.15	203.4	0	0.232815	0.80553	3.82884	2.76399	2.65082	1.94998	0.892277	1.02931	0.000646	-4.9477	-4.91418	-4.97497	-4.96086	-5.00936							Training	-4.97862	0.00309092	0.109625
ChCl-FA (1 : 5)	313.15	304.7	0	0.232815	0.80553	3.82884	2.76399	2.65082	1.94998	0.892277	1.02931	0.000646	-4.5469	-4.51485	-4.55147	-4.53416	-4.54122							Training	-4.51218	0.00297736	0.238654
ChCl-FA (1 : 5)	313.15	404.9	0	0.232815	0.80553	3.82884	2.76399	2.65082	1.94998	0.892277	1.02931	0.000646	-4.2616	-4.23951	-4.25165	-4.2557	-4.22177							Training	-4.22387	0.00288019	0.194032
ChCl-FA (1 : 5)	313.15	505.2	0	0.232815	0.80553	3.82884	2.76399	2.65082	1.94998	0.892277	1.02931	0.000646	-4.0399	-4.01806	-4.01067	-4.04845	-3.98755							Testing	-4.02939	0.00279801	-0.0375801
ChCl-FA (1 : 5)	313.15	570.2	0	0.232815	0.80553	3.82884	2.76399	2.65082	1.94998	0.892277	1.02931	0.000646	-3.9221	-3.89269	-3.87497	-3.93573	-3.86479							Testing	-3.92906	0.00275282	-0.221903
ChCl-FA (1 : 5)	323.15	71.3	0	0.232815	0.80553	3.82884	2.76399	2.65082	1.94998	0.892277	1.02931	0.000646	-6.0748	-6.1265	-6.16696	-6.15797	-6.16418							Testing	-6.12744	0.00374995	0.275757
ChCl-FA (1 : 5)	323.15	194.1	0	0.232815	0.80553	3.82884	2.76399	2.65082	1.94998	0.892277	1.02931	0.000646	-5.0995	-5.1134	-5.159	-5.16762	-5.22171							Training	-5.18297	0.0035752	0.427577
ChCl-FA (1 : 5)	323.15	301	0	0.232815	0.80553	3.82884	2.76399	2.65082	1.94998	0.892277	1.02931	0.000646	-4.667	-4.6779	-4.69922	-4.7031	-4.71554							Training	-4.67449	0.00344151	0.42323
ChCl-FA (1 : 5)	323.15	403.6	0	0.232815	0.80553	3.82884	2.76399	2.65082	1.94998	0.892277	1.02931	0.000646	-4.3741	-4.39299	-4.39037	-4.41226	-4.38463							Training	-4.37402	0.00332933	0.379351
ChCl-FA (1 : 5)	323.15	502.8	0	0.232815	0.80553	3.82884	2.76399	2.65082	1.94998	0.892277	1.02931	0.000646	-4.1477	-4.17188	-4.15155	-4.20197	-4.14977							Training	-4.17785	0.00323589	0.202643
ChCl-FA (1 : 5)	323.15	573.1	0	0.232815	0.80553	3.82884	2.76399	2.65082	1.94998	0.892277	1.02931	0.000646	-4.0174	-4.03514	-4.00507	-4.07656	-4.01516							Testing	-4.06701	0.00317861	-0.0299044
ChCl-FA (1 : 5)	333.15	74.9	0	0.232815	0.80553	3.82884	2.76399	2.65082	1.94998	0.892277	1.02931	0.000646	-6.2146	-6.23226	-6.26013	-6.26364	-6.28106							Training	-6.25192	0.00441923	0.433525
ChCl-FA (1 : 5)	333.15	204.2	0	0.232815	0.80553	3.82884	2.76399	2.65082	1.94998	0.892277	1.02931	0.000646	-5.2214	-5.21357	-5.24368	-5.27074	-5.32319							Training	-5.28135	0.00422107	0.469243
ChCl-FA (1 : 5)	333.15	315.2	0	0.232815	0.80553	3.82884	2.76399	2.65082	1.94998	0.892277	1.02931	0.000646	-4.7795	-4.78492	-4.78971	-4.81421	-4.8229							Testing	-4.7806	0.00407097	0.45161
ChCl-FA (1 : 5)	333.15	409.6	0	0.232815	0.80553	3.82884	2.76399	2.65082	1.94998	0.892277	1.02931	0.000646	-4.5008	-4.52919	-4.51354	-4.55286	-4.52819							Training	-4.514	0.00395787	0.4787
ChCl-FA (1 : 5)	333.15	511.7	0	0.232815	0.80553	3.82884	2.76399	2.65082	1.94998	0.892277	1.02931	0.000646	-4.2904	-4.30309	-4.27141	-4.33532	-4.28941							Training	-4.31284	0.0038506	0.243346
ChCl-FA (1 : 5)	333.15	577.2	0	0.232815	0.80553	3.82884	2.76399	2.65082	1.94998	0.892277	1.02931	0.000646	-4.1734	-4.17581	-4.13659	-4.2164	-4.16421							Testing	-4.20798	0.00379003	0.0129464
ChCl-LEV (1 : 5)	303.15	71.5	0	0	0.504571	5.70588	3.71115	0.985794	1.19161	2.31079	1.03649	0.000646	-5.4968	-5.52215	-5.42365	-5.5016	-5.42867							Training	-5.48371	0.00537889	-0.102884
ChCl-LEV (1 : 5)	303.15	188.9	0	0	0.504571	5.70588	3.71115	0.985794	1.19161	2.31079	1.03649	0.000646	-4.4918	-4.52878	-4.44361	-4.58932	-4.53975							Testing	-4.6009	0.00534939	0.134239
ChCl-LEV (1 : 5)	303.15	296.9	0	0	0.504571	5.70588	3.71115	0.985794	1.19161	2.31079	1.03649	0.000646	-4.0342	-4.06364	-4.00272	-4.11152	-4.04039							Training	-4.08899	0.00534052	0.286045
ChCl-LEV (1 : 5)	303.15	401.7	0	0	0.504571	5.70588	3.71115	0.985794	1.19161	2.31079	1.03649	0.000646	-3.7423	-3.75911	-3.72188	-3.79375	-3.71974							Training	-3.77527	0.00534866	0.224012
ChCl-LEV (1 : 5)	303.15	501.5	0	0	0.504571	5.70588	3.71115	0.985794	1.19161	2.31079	1.03649	0.000646	-3.5268	-3.52881	-3.51407	-3.55465	-3.50129							Training	-3.56659	0.00537173	0.0172242
ChCl-LEV (1 : 5)	303.15	566.7	0	0	0.504571	5.70588	3.71115	0.985794	1.19161	2.31079	1.03649	0.000646	-3.4022	-3.39721	-3.397	-3.41693	-3.38695							Testing	-3.45549	0.00539488	-0.18901
ChCl-LEV (1 : 5)	313.15	73.1	0	0	0.504571	5.70588	3.71115	0.985794	1.19161	2.31079	1.03649	0.000646	-5.7446	-5.68003	-5.6466	-5.61977	-5.61214							Training	-5.60767	0.00537118	-0.206869
ChCl-LEV (1 : 5)	313.15	200.1	0	0	0.504571	5.70588	3.71115	0.985794	1.19161	2.31079	1.03649	0.000646	-4.646	-4.6469	-4.62449	-4.68577	-4.68321							Testing	-4.68542	0.00532527	0.0809276
ChCl-LEV (1 : 5)	313.15	308.4	0	0	0.504571	5.70588	3.71115	0.985794	1.19161	2.31079	1.03649	0.000646	-4.1865	-4.20373	-4.20201	-4.23683	-4.20689							Testing	-4.20692	0.00530524	0.243859
ChCl-LEV (1 : 5)	313.15	412.2	0	0	0.504571	5.70588	3.71115	0.985794	1.19161	2.31079	1.03649	0.000646	-3.912	-3.9103	-3.92888	-3.93445	-3.90079							Testing	-3.91897	0.00530258	0.149746
ChCl-LEV (1 : 5)	313.15	511.4	0	0	0.504571	5.70588	3.71115	0.985794	1.19161	2.31079	1.03649	0.000646	-3.6969	-3.68458	-3.72277	-3.70086	-3.68803							Training	-3.72703	0.00531514	-0.0140353
ChCl-LEV (1 : 5)	313.15	573.7	0	0	0.504571	5.70588	3.71115	0.985794	1.19161	2.31079	1.03649	0.000646	-3.572	-3.55974	-3.61015	-3.56951	-3.57926							Training	-3.62899	0.00533058	-0.165881
ChCl-LEV (1 : 5)	323.15	75.6	0	0	0.504571	5.70588	3.71115	0.985794	1.19161	2.31079	1.03649	0.000646	-5.8091	-5.82301	-5.79451	-5.72461	-5.77628							Training	-5.73624	0.00554994	0.106445
ChCl-LEV (1 : 5)	323.15	208.8	0	0	0.504571	5.70588	3.71115	0.985794	1.19161	2.31079	1.03649	0.000646	-4.7915	-4.77704	-4.7601	-4.79439	-4.83206							Testing	-4.79972	0.00548694	0.0916193
ChCl-LEV (1 : 5)	323.15	315.9	0	0	0.504571	5.70588	3.71115	0.985794	1.19161	2.31079	1.03649	0.000646	-4.3583	-4.35388	-4.35669	-4.37324	-4.37786							Training	-4.35274	0.0054556	0.267335
ChCl-LEV (1 : 5)	323.15	418.4	0	0	0.504571	5.70588	3.71115	0.985794	1.19161	2.31079	1.03649	0.000646	-4.0513	-4.0686	-4.091	-4.08404	-4.08228							Testing	-4.08507	0.00544174	0.216531
ChCl-LEV (1 : 5)	323.15	517.2	0	0	0.504571	5.70588	3.71115	0.985794	1.19161	2.31079	1.03649	0.000646	-3.849	-3.84524	-3.88692	-3.85501	-3.87238							Training	-3.90632	0.0054433	0.0266925
ChCl-LEV (1 : 5)	323.15	579.9	0	0	0.504571	5.70588	3.71115	0.985794	1.19161	2.31079	1.03649	0.000646	-3.7339	-3.72008	-3.77391	-3.72354	-3.76304							Testing	-3.81495	0.00545189	-0.184157
ChCl-LEV (1 : 5)	333.15	78.9	0	0	0.504571	5.70588	3.71115	0.985794	1.19161	2.31079	1.03649	0.000646	-5.9145	-5.95284	-5.92655	-5.82198	-5.92204							Training	-5.86148	0.00591491	0.308747
ChCl-LEV (1 : 5)	333.15	216.1	0	0	0.504571	5.70588	3.71115	0.985794	1.19161	2.31079	1.03649	0.000646	-4.9063	-4.91174	-4.89774	-4.90887	-4.97893							Testing	-4.92575	0.00583467	0.198023
ChCl-LEV (1 : 5)	333.15	319.2	0	0	0.504571	5.70588	3.71115	0.985794	1.19161	2.31079	1.03649	0.000646	-4.5099	-4.51362	-4.51828	-4.51951	-4.55307							Testing	-4.5137	0.00579297	0.28484
ChCl-LEV (1 : 5)	333.15	417.3	0	0	0.504571	5.70588	3.71115	0.985794	1.19161	2.31079	1.03649	0.000646	-4.2267	-4.24089	-4.26418	-4.24805	-4.27163							Training	-4.26621	0.0057681	0.292675
ChCl-LEV (1 : 5)	333.15	519.7	0	0	0.504571	5.70588	3.71115	0.985794	1.19161	2.31079	1.03649	0.000646	-4.023	-4.00877	-4.05207	-4.01348	-4.05358							Training	-4.08929	0.00575756	0.0393256
ChCl-LEV (1 : 5)	333.15	581	0	0	0.504571	5.70588	3.71115	0.985794	1.19161	2.31079	1.03649	0.000646	-3.917	-3.88618	-3.9414	-3.88594	-3.94628							Testing	-4.00547	0.00575877	-0.183014
Betain-1,2-propanediol (1 : 6)	308.15	189.5	0.000171429	0.312686	0.777214	2.31708	4.07312	1.71206	0.765886	0.977571	1.09636	0.12435	-5.185	-5.23216	-5.2306	-5.26272	-5.2107							Testing	-5.21596	0.00331966	-0.513114
Betain-1,2-propanediol (1 : 6)	308.15	303.3	0.000171429	0.312686	0.777214	2.31708	4.07312	1.71206	0.765886	0.977571	1.09636	0.12435	-4.756	-4.71696	-4.69706	-4.71023	-4.65572							Training	-4.68262	0.00324078	-0.469634
Betain-1,2-propanediol (1 : 6)	308.15	403.8	0.000171429	0.312686	0.777214	2.31708	4.07312	1.71206	0.765886	0.977571	1.09636	0.12435	-4.4312	-4.41661	-4.39273	-4.41218	-4.32461							Training	-4.37791	0.00318729	-0.423015
Betain-1,2-propanediol (1 : 6)	308.15	505	0.000171429	0.312686	0.777214	2.31708	4.07312	1.71206	0.765886	0.977571	1.09636	0.12435	-4.1997	-4.17838	-4.15443	-4.19757	-4.07891							Testing	-4.15378	0.00314875	-0.626135
Betain-1,2-propanediol (1 : 6)	308.15	604.5	0.000171429	0.312686	0.777214	2.31708	4.07312	1.71206	0.765886	0.977571	1.09636	0.12435	-4.0063	-3.98077	-3.95783	-4.03016	-3.88897							Training	-3.97371	0.00312584	-0.858908
Betain-1,2-propanediol (1 : 6)	318.15	208	0.000171429	0.312686	0.777214	2.31708	4.07312	1.71206	0.765886	0.977571	1.09636	0.12435	-5.2983	-5.2705	-5.28218	-5.27662	-5.25546							Training	-5.29977	0.0037573	-0.574978
Betain-1,2-propanediol (1 : 6)	318.15	318	0.000171429	0.312686	0.777214	2.31708	4.07312	1.71206	0.765886	0.977571	1.09636	0.12435	-4.8536	-4.80962	-4.80715	-4.78841	-4.75586							Testing	-4.81334	0.00367062	-0.392712
Betain-1,2-propanediol (1 : 6)	318.15	423.8	0.000171429	0.312686	0.777214	2.31708	4.07312	1.71206	0.765886	0.977571	1.09636	0.12435	-4.5282	-4.50677	-4.50171	-4.49192	-4.4271							Testing	-4.50539	0.00360438	-0.382912
Betain-1,2-propanediol (1 : 6)	318.15	529.8	0.000171429	0.312686	0.777214	2.31708	4.07312	1.71206	0.765886	0.977571	1.09636	0.12435	-4.2904	-4.26571	-4.26187	-4.27574	-4.18385							Training	-4.27719	0.00355487	-0.552491
Betain-1,2-propanediol (1 : 6)	318.15	634.3	0.000171429	0.312686	0.777214	2.31708	4.07312	1.71206	0.765886	0.977571	1.09636	0.12435	-4.0984	-4.06477	-4.06287	-4.1035	-3.99357							Testing	-4.09066	0.00352257	-0.867852
Betain-1,2-propanediol (1 : 6)	328.15	213	0.000171429	0.312686	0.777214	2.31708	4.07312	1.71206	0.765886	0.977571	1.09636	0.12435	-5.4037	-5.38848	-5.40571	-5.37844	-5.38224							Training	-5.44413	0.00439152	-0.403082
Betain-1,2-propanediol (1 : 6)	328.15	332.5	0.000171429	0.312686	0.777214	2.31708	4.07312	1.71206	0.765886	0.977571	1.09636	0.12435	-4.9477	-4.90609	-4.91056	-4.8722	-4.86152							Testing	-4.92867	0.00428478	-0.279558
Betain-1,2-propanediol (1 : 6)	328.15	443.3	0.000171429	0.312686	0.777214	2.31708	4.07312	1.71206	0.765886	0.977571	1.09636	0.12435	-4.6254	-4.6008	-4.60476	-4.57615	-4.53569							Training	-4.61746	0.00420496	-0.281727
Betain-1,2-propanediol (1 : 6)	328.15	552.8	0.000171429	0.312686	0.777214	2.31708	4.07312	1.71206	0.765886	0.977571	1.09636	0.12435	-4.3583	-4.35904	-4.36608	-4.35887	-4.29662							Testing	-4.38697	0.00414418	-0.463502
Betain-1,2-propanediol (1 : 6)	328.15	663.3	0.000171429	0.312686	0.777214	2.31708	4.07312	1.71206	0.765886	0.977571	1.09636	0.12435	-4.1865	-4.15261	-4.16307	-4.1786	-4.10325							Testing	-4.19216	0.0041011	-0.842822
Betain-1,2-propanediol (1 : 6)	338.15	217.3	0.000171429	0.312686	0.777214	2.31708	4.07312	1.71206	0.765886	0.977571	1.09636	0.12435	-5.4968	-5.51182	-5.53397	-5.48784	-5.51473							Training	-5.57996	0.0052127	-0.189584
Betain-1,2-propanediol (1 : 6)	338.15	346.5	0.000171429	0.312686	0.777214	2.31708	4.07312	1.71206	0.765886	0.977571	1.09636	0.12435	-5.036	-5.00698	-5.01801	-4.96217	-4.97313							Training	-5.03444	0.00508359	-0.115785
Betain-1,2-propanediol (1 : 6)	338.15	461.8	0.000171429	0.312686	0.777214	2.31708	4.07312	1.71206	0.765886	0.977571	1.09636	0.12435	-4.6995	-4.69958	-4.71235	-4.66564	-4.6509							Training	-4.72038	0.00498952	-0.14773
Betain-1,2-propanediol (1 : 6)	338.15	576	0.000171429	0.312686	0.777214	2.31708	4.07312	1.71206	0.765886	0.977571	1.09636	0.12435	-4.4312	-4.45406	-4.47194	-4.44325	-4.41265							Training	-4.48485	0.00491602	-0.333032
Betain-1,2-propanediol (1 : 6)	338.15	691.5	0.000171429	0.312686	0.777214	2.31708	4.07312	1.71206	0.765886	0.977571	1.09636	0.12435	-4.2545	-4.24414	-4.26699	-4.25547	-4.21754							Testing	-4.28418	0.0048616	-0.76557
Betain-1,2-propanediol (1 : 6)	348.15	226	0.000171429	0.312686	0.777214	2.31708	4.07312	1.71206	0.765886	0.977571	1.09636	0.12435	-5.5728	-5.61486	-5.64197	-5.578	-5.62629							Testing	-5.68647	0.00621493	-0.0499983
Betain-1,2-propanediol (1 : 6)	348.15	360.3	0.000171429	0.312686	0.777214	2.31708	4.07312	1.71206	0.765886	0.977571	1.09636	0.12435	-5.116	-5.11108	-5.12979	-5.05707	-5.0891							Testing	-5.13632	0.00606689	0.0013231
Betain-1,2-propanediol (1 : 6)	348.15	480.5	0.000171429	0.312686	0.777214	2.31708	4.07312	1.71206	0.765886	0.977571	1.09636	0.12435	-4.7795	-4.80006	-4.82292	-4.75757	-4.76929							Testing	-4.81836	0.00595735	-0.0644748
Betain-1,2-propanediol (1 : 6)	348.15	599.3	0.000171429	0.312686	0.777214	2.31708	4.07312	1.71206	0.765886	0.977571	1.09636	0.12435	-4.5008	-4.55095	-4.58107	-4.5291	-4.53186							Training	-4.57845	0.0058704	-0.222847
Betain-1,2-propanediol (1 : 6)	348.15	719	0.000171429	0.312686	0.777214	2.31708	4.07312	1.71206	0.765886	0.977571	1.09636	0.12435	-4.32	-4.33907	-4.37567	-4.33409	-4.33593							Testing	-4.37413	0.00580422	-0.677597
Betain-diethylene glycol (1 : 6)	308.15	202.8	0	0.124371	0.873214	3.27438	5.68296	1.40691	0.814014	1.39504	1.30534	0.122036	-4.8665	-4.93808	-4.84018	-4.93799	-4.95507							Training	-4.82848	0.00515567	-0.280742
Betain-diethylene glycol (1 : 6)	308.15	312.5	0	0.124371	0.873214	3.27438	5.68296	1.40691	0.814014	1.39504	1.30534	0.122036	-4.4312	-4.45721	-4.36684	-4.44528	-4.48052							Training	-4.35512	0.00514582	-0.103552
Betain-diethylene glycol (1 : 6)	308.15	413.3	0	0.124371	0.873214	3.27438	5.68296	1.40691	0.814014	1.39504	1.30534	0.122036	-4.1227	-4.15895	-4.09583	-4.15558	-4.17799							Training	-4.06678	0.00515269	-0.0976259
Betain-diethylene glycol (1 : 6)	308.15	512.3	0	0.124371	0.873214	3.27438	5.68296	1.40691	0.814014	1.39504	1.30534	0.122036	-3.8922	-3.92593	-3.88559	-3.9454	-3.95381							Training	-3.8536	0.00517429	-0.263205
Betain-diethylene glycol (1 : 6)	308.15	622	0	0.124371	0.873214	3.27438	5.68296	1.40691	0.814014	1.39504	1.30534	0.122036	-3.677	-3.70843	-3.67742	-3.75795	-3.75526							Testing	-3.65572	0.0052154	-0.567056
Betain-diethylene glycol (1 : 6)	318.15	214.5	0	0.124371	0.873214	3.27438	5.68296	1.40691	0.814014	1.39504	1.30534	0.122036	-5.0207	-5.03396	-5.00162	-5.02516	-5.0531							Training	-4.96292	0.00509929	-0.344064
Betain-diethylene glycol (1 : 6)	318.15	330.5	0	0.124371	0.873214	3.27438	5.68296	1.40691	0.814014	1.39504	1.30534	0.122036	-4.5564	-4.557	-4.53329	-4.53804	-4.58108							Testing	-4.48478	0.00507756	-0.121012
Betain-diethylene glycol (1 : 6)	318.15	437.3	0	0.124371	0.873214	3.27438	5.68296	1.40691	0.814014	1.39504	1.30534	0.122036	-4.2475	-4.25682	-4.25642	-4.24752	-4.28138							Testing	-4.19255	0.00507541	-0.156496
Betain-diethylene glycol (1 : 6)	318.15	540.8	0	0.124371	0.873214	3.27438	5.68296	1.40691	0.814014	1.39504	1.30534	0.122036	-4.0063	-4.0229	-4.03652	-4.03481	-4.0611							Testing	-3.97511	0.00508966	-0.325688
Betain-diethylene glycol (1 : 6)	318.15	656	0	0.124371	0.873214	3.27438	5.68296	1.40691	0.814014	1.39504	1.30534	0.122036	-3.7766	-3.80295	-3.81317	-3.83996	-3.86257							Testing	-3.76833	0.00512443	-0.603866
Betain-diethylene glycol (1 : 6)	328.15	226	0	0.124371	0.873214	3.27438	5.68296	1.40691	0.814014	1.39504	1.30534	0.122036	-5.1499	-5.13605	-5.12869	-5.12333	-5.15501							Training	-5.09944	0.00522775	-0.298029
Betain-diethylene glycol (1 : 6)	328.15	348	0	0.124371	0.873214	3.27438	5.68296	1.40691	0.814014	1.39504	1.30534	0.122036	-4.6886	-4.66262	-4.6652	-4.64102	-4.68685							Testing	-4.61639	0.00519293	-0.117285
Betain-diethylene glycol (1 : 6)	328.15	460.5	0	0.124371	0.873214	3.27438	5.68296	1.40691	0.814014	1.39504	1.30534	0.122036	-4.3741	-4.36009	-4.38154	-4.3482	-4.39017							Testing	-4.31908	0.00518061	-0.179896
Betain-diethylene glycol (1 : 6)	328.15	593.3	0	0.124371	0.873214	3.27438	5.68296	1.40691	0.814014	1.39504	1.30534	0.122036	-4.1166	-4.07562	-4.10135	-4.08646	-4.12873							Training	-4.04931	0.00519053	-0.49119
Betain-diethylene glycol (1 : 6)	328.15	692	0	0.124371	0.873214	3.27438	5.68296	1.40691	0.814014	1.39504	1.30534	0.122036	-3.8971	-3.89718	-3.91092	-3.92288	-3.96887							Testing	-3.87501	0.00521505	-0.703197
Betain-diethylene glycol (1 : 6)	338.15	237	0	0.124371	0.873214	3.27438	5.68296	1.40691	0.814014	1.39504	1.30534	0.122036	-5.2785	-5.24516	-5.25834	-5.23227	-5.26142							Training	-5.24515	0.00554125	-0.239061
Betain-diethylene glycol (1 : 6)	338.15	364.8	0	0.124371	0.873214	3.27438	5.68296	1.40691	0.814014	1.39504	1.30534	0.122036	-4.8036	-4.77399	-4.79653	-4.75307	-4.79745							Training	-4.75641	0.00549212	-0.0334898
Betain-diethylene glycol (1 : 6)	338.15	483	0	0.124371	0.873214	3.27438	5.68296	1.40691	0.814014	1.39504	1.30534	0.122036	-4.483	-4.46797	-4.50312	-4.4559	-4.5031							Testing	-4.45245	0.0054685	-0.157342
Betain-diethylene glycol (1 : 6)	338.15	597.5	0	0.124371	0.873214	3.27438	5.68296	1.40691	0.814014	1.39504	1.30534	0.122036	-4.2267	-4.22622	-4.25819	-4.22898	-4.28397							Training	-4.21882	0.00546563	-0.339673
Betain-diethylene glycol (1 : 6)	338.15	726.8	0	0.124371	0.873214	3.27438	5.68296	1.40691	0.814014	1.39504	1.30534	0.122036	-4.0118	-3.9966	-4.01053	-4.01082	-4.07855							Testing	-3.98878	0.00548604	-0.780638
Betain-diethylene glycol (1 : 6)	348.15	247.5	0	0.124371	0.873214	3.27438	5.68296	1.40691	0.814014	1.39504	1.30534	0.122036	-5.4037	-5.36056	-5.39423	-5.35012	-5.37146							Testing	-5.404	0.00603994	-0.201087
Betain-diethylene glycol (1 : 6)	348.15	381	0	0.124371	0.873214	3.27438	5.68296	1.40691	0.814014	1.39504	1.30534	0.122036	-4.9063	-4.89019	-4.93049	-4.87229	-4.91163							Testing	-4.90858	0.0059753	0.0124958
Betain-diethylene glycol (1 : 6)	348.15	504.5	0	0.124371	0.873214	3.27438	5.68296	1.40691	0.814014	1.39504	1.30534	0.122036	-4.5952	-4.58071	-4.62601	-4.56996	-4.61989							Training	-4.59768	0.00593932	-0.101463
Betain-diethylene glycol (1 : 6)	348.15	624.3	0	0.124371	0.873214	3.27438	5.68296	1.40691	0.814014	1.39504	1.30534	0.122036	-4.3275	-4.33481	-4.37037	-4.33415	-4.40052							Training	-4.35532	0.00592629	-0.328379
Betain-diethylene glycol (1 : 6)	348.15	759.8	0	0.124371	0.873214	3.27438	5.68296	1.40691	0.814014	1.39504	1.30534	0.122036	-4.1105	-4.10179	-4.12034	-4.10395	-4.19179							Testing	-4.11539	0.00593752	-0.808325
Betain-diethanolamine (1 : 6)	313.5	600	0	0.0139286	0.944357	2.98505	5.96831	1.50099	0.831157	1.041	1.40879	0.12975	-2.501	-2.49709	-2.50101	-3.02437	-2.64126							Training	-2.60252	0.0076509	2.75128
[TBA]Br-methyldiethanol amine (1 : 6)	303.15	445.6	0	0.00475714	0.471	3.25016	9.15075	2.85949	0.705307	1.06288	1.60669	0.00379286	-2.2415	-2.45078	-2.49302	-2.44469	-2.33769							Training	-2.35798	0.00604398	3.28801
[TBA]Br-methyldiethanol amine (1 : 6)	303.15	573	0	0.00475714	0.471	3.25016	9.15075	2.85949	0.705307	1.06288	1.60669	0.00379286	-2.1804	-2.19159	-2.22385	-2.19853	-2.11419							Training	-2.11122	0.00605325	2.51806
[TBA]Br-methyldiethanol amine (1 : 6)	303.15	661.7	0	0.00475714	0.471	3.25016	9.15075	2.85949	0.705307	1.06288	1.60669	0.00379286	-2.1062	-2.03875	-2.06377	-2.0545	-1.99006							Testing	-1.96849	0.00607409	1.98056
[TBA]Br-methyldiethanol amine (1 : 6)	303.15	721	0	0.00475714	0.471	3.25016	9.15075	2.85949	0.705307	1.06288	1.60669	0.00379286	-1.9863	-1.94693	-1.96617	-1.96639	-1.91628							Training	-1.88242	0.00609461	1.91471
[TBA]Br-methyldiethanol amine (1 : 6)	303.15	911.2	0	0.00475714	0.471	3.25016	9.15075	2.85949	0.705307	1.06288	1.60669	0.00379286	-1.8925	-1.70047	-1.69251	-1.71545	-1.71032							Training	-1.64535	0.00619605	1.40074
[TBA]Br-methyldiethanol amine (1 : 6)	303.15	1096	0	0.00475714	0.471	3.25016	9.15075	2.85949	0.705307	1.06288	1.60669	0.00379286	-1.797	-1.51903	-1.46588	-1.50738	-1.53628							Testing	-1.46104	0.00634662	1.41421
[TBA]Br-diethanol amine (1 : 6)	303.15	523.4	0	0.0139286	0.852686	3.00639	7.93112	2.59977	0.797921	1.06708	1.62936	0.00885	-3.4358	-3.2386	-3.11117	-3.10304	-3.11842							Training	-3.18107	0.00578745	0.329895
[TBA]Br-diethanol amine (1 : 6)	303.15	663.5	0	0.0139286	0.852686	3.00639	7.93112	2.59977	0.797921	1.06708	1.62936	0.00885	-2.9858	-2.95922	-2.91626	-2.89568	-2.90795							Training	-2.95824	0.00576979	0.388308
[TBA]Br-diethanol amine (1 : 6)	303.15	710	0	0.0139286	0.852686	3.00639	7.93112	2.59977	0.797921	1.06708	1.62936	0.00885	-2.8336	-2.87721	-2.86067	-2.83528	-2.84843							Training	-2.89328	0.00577044	0.414417
[TBA]Br-diethanol amine (1 : 6)	303.15	814	0	0.0139286	0.852686	3.00639	7.93112	2.59977	0.797921	1.06708	1.62936	0.00885	-2.6465	-2.71059	-2.74941	-2.71071	-2.7272							Training	-2.76044	0.00578365	0.110334
[TBA]Br-diethanol amine (1 : 6)	303.15	971	0	0.0139286	0.852686	3.00639	7.93112	2.59977	0.797921	1.06708	1.62936	0.00885	-2.4068	-2.49802	-2.61026	-2.54411	-2.56496							Training	-2.58844	0.00583434	0.519118
[ATPP]Br-Phenol (1 : 6)	313.15	183.3	0.041538	0.475623	0.306298	3.49134	3.5369	4.58188	2.64211	0.712915	0.431566	0.00826	-3.7091	-3.65359	-3.65985	-3.67307	-3.61951							Testing	-3.65751	0.00601186	2.67528
[ATPP]Br-Phenol (1 : 6)	313.15	409.8	0.041538	0.475623	0.306298	3.49134	3.5369	4.58188	2.64211	0.712915	0.431566	0.00826	-2.8302	-2.88933	-2.84851	-2.82715	-2.70208							Training	-2.75192	0.00579876	2.86852
[ATPP]Br-Phenol (1 : 6)	313.15	669	0.041538	0.475623	0.306298	3.49134	3.5369	4.58188	2.64211	0.712915	0.431566	0.00826	-2.3969	-2.38782	-2.30567	-2.36519	-2.24285							Testing	-2.36853	0.00564938	1.95678
[ATPP]Br-Phenol (1 : 6)	313.15	871.7	0.041538	0.475623	0.306298	3.49134	3.5369	4.58188	2.64211	0.712915	0.431566	0.00826	-2.051	-2.11166	-2.00609	-2.10431	-2.02146							Training	-2.1517	0.00560283	1.39556
[ATPP]Br-Phenol (1 : 6)	313.15	1098.5	0.041538	0.475623	0.306298	3.49134	3.5369	4.58188	2.64211	0.712915	0.431566	0.00826	-1.7982	-1.89763	-1.75662	-1.86395	-1.82128							Training	-1.90733	0.00562386	1.81242
[ATPP]Br-Phenol (1 : 6)	313.15	1320.3	0.041538	0.475623	0.306298	3.49134	3.5369	4.58188	2.64211	0.712915	0.431566	0.00826	-1.6348	-1.76282	-1.57544	-1.66884	-1.6457							Testing	-1.67482	0.0057191	1.94627
[ATPP]Br-Phenol (1 : 6)	323.15	159.9	0.041538	0.475623	0.306298	3.49134	3.5369	4.58188	2.64211	0.712915	0.431566	0.00826	-3.8304	-3.88163	-3.96883	-3.97483	-3.97186							Training	-3.92837	0.00654548	3.40773
[ATPP]Br-Phenol (1 : 6)	323.15	327.3	0.041538	0.475623	0.306298	3.49134	3.5369	4.58188	2.64211	0.712915	0.431566	0.00826	-3.0813	-3.19866	-3.26077	-3.19981	-3.14815							Training	-3.08939	0.00635461	3.30895
[ATPP]Br-Phenol (1 : 6)	323.15	567.9	0.041538	0.475623	0.306298	3.49134	3.5369	4.58188	2.64211	0.712915	0.431566	0.00826	-2.5498	-2.6519	-2.66801	-2.66005	-2.58386							Training	-2.60714	0.00615396	2.83872
[ATPP]Br-Phenol (1 : 6)	323.15	818.9	0.041538	0.475623	0.306298	3.49134	3.5369	4.58188	2.64211	0.712915	0.431566	0.00826	-2.3645	-2.26169	-2.25274	-2.29174	-2.26006							Training	-2.32705	0.00603725	1.47528
[ATPP]Br-Phenol (1 : 6)	323.15	1088.3	0.041538	0.475623	0.306298	3.49134	3.5369	4.58188	2.64211	0.712915	0.431566	0.00826	-2.0542	-1.9877	-1.94301	-1.98212	-2.00037							Training	-2.04122	0.0060172	1.46472
[ATPP]Br-Phenol (1 : 6)	323.15	1328.9	0.041538	0.475623	0.306298	3.49134	3.5369	4.58188	2.64211	0.712915	0.431566	0.00826	-1.814	-1.83854	-1.74648	-1.75734	-1.7943							Testing	-1.79693	0.00609139	1.76873
[ATPP]Br-Phenol (1 : 6)	333.15	191.2	0.041538	0.475623	0.306298	3.49134	3.5369	4.58188	2.64211	0.712915	0.431566	0.00826	-3.8538	-3.80472	-3.97685	-3.93134	-3.9722							Testing	-3.84338	0.00719742	3.20237
[ATPP]Br-Phenol (1 : 6)	333.15	457.2	0.041538	0.475623	0.306298	3.49134	3.5369	4.58188	2.64211	0.712915	0.431566	0.00826	-2.9565	-2.96869	-3.08714	-3.01918	-2.99222							Training	-2.90125	0.00689443	3.11365
[ATPP]Br-Phenol (1 : 6)	333.15	700.8	0.041538	0.475623	0.306298	3.49134	3.5369	4.58188	2.64211	0.712915	0.431566	0.00826	-2.5498	-2.51663	-2.60822	-2.58822	-2.5854							Testing	-2.57631	0.00671013	2.24522
[ATPP]Br-Phenol (1 : 6)	333.15	978.4	0.041538	0.475623	0.306298	3.49134	3.5369	4.58188	2.64211	0.712915	0.431566	0.00826	-2.3177	-2.16809	-2.23444	-2.21935	-2.27404							Training	-2.27843	0.0066087	1.17881
[ATPP]Br-Phenol (1 : 6)	333.15	1123.6	0.041538	0.475623	0.306298	3.49134	3.5369	4.58188	2.64211	0.712915	0.431566	0.00826	-2.1481	-2.04338	-2.08886	-2.05719	-2.13309							Training	-2.1239	0.00660172	1.46402
[ATPP]Br-Phenol (1 : 6)	333.15	1387.3	0.041538	0.475623	0.306298	3.49134	3.5369	4.58188	2.64211	0.712915	0.431566	0.00826	-1.9139	-1.8923	-1.88635	-1.80609	-1.89345							Testing	-1.86734	0.00666997	1.73607
TPACl-AC (1 : 6)	298.15	350	0.055728	0.440449	0.304872	2.59145	3.99365	1.44816	0.932974	1.52209	0.640957	0.04466	-3.8899	-3.75532	-3.79562	-3.71715	-3.93304							Testing	-3.65049	0.00902063	0.134769
TPACl-AC (1 : 6)	298.15	554	0.055728	0.440449	0.304872	2.59145	3.99365	1.44816	0.932974	1.52209	0.640957	0.04466	-3.2581	-3.32289	-3.34134	-3.28641	-3.40641							Training	-3.23887	0.00885868	0.203734
TPACl-AC (1 : 6)	298.15	826	0.055728	0.440449	0.304872	2.59145	3.99365	1.44816	0.932974	1.52209	0.640957	0.04466	-2.871	-2.93831	-2.93174	-2.93914	-3.00307							Testing	-2.91479	0.00873991	-0.852869
TPACl-AC (1 : 6)	298.15	1220	0.055728	0.440449	0.304872	2.59145	3.99365	1.44816	0.932974	1.52209	0.640957	0.04466	-2.5577	-2.56307	-2.53676	-2.586	-2.59778							Training	-2.59346	0.00876481	-0.454471
TPACl-AC (1 : 6)	298.15	1652	0.055728	0.440449	0.304872	2.59145	3.99365	1.44816	0.932974	1.52209	0.640957	0.04466	-2.2781	-2.27575	-2.25541	-2.31777	-2.2384							Training	-2.30744	0.00905994	-0.1379
TPACl-AC (1 : 6)	298.15	2030	0.055728	0.440449	0.304872	2.59145	3.99365	1.44816	0.932974	1.52209	0.640957	0.04466	-2.0778	-2.07207	-2.07874	-2.15822	-1.97138							Testing	-2.05871	0.00954797	-0.00236273
[TBA]Br-EA (1 : 6)	298.15	1000	0	0	0.72369	2.48738	5.11787	1.76936	0.54614	0.813487	1.26958	0.016194	-2.1497	-2.11364	-1.92281	-1.85198	-2.03397							Training	-2.27402	0.00783807	1.13999
[TBA]Br-DEA (1 : 6)	298.15	1000	0	0.013975	0.857635	3.12769	7.11492	2.13211	0.796916	1.05665	1.64106	0.007852	-2.2509	-2.282	-2.33254	-2.53058	-2.44461							Testing	-2.75239	0.00524937	0.825389
[MTPP]Br-EA (1 : 6)	298.15	1000	0	0	0.792535	2.86152	4.5214	2.54737	0.587874	0.834536	1.25044	0.01639	-1.9379	-1.91619	-1.94026	-1.97939	-2.01441							Testing	-2.19965	0.0113657	1.65764
[Ch]Cl-EA (1 : 7)	298.15	182	0	0	0.8781	2.447	3.9194	1.1286	0.6251	0.8928	1.1939	0.0168	-2.9439	-2.83432	-2.80926	-3.08031	-3.19376							Training	-3.04095	0.010342	4.45725
[Ch]Cl-EA (1 : 7)	298.15	346	0	0	0.8781	2.447	3.9194	1.1286	0.6251	0.8928	1.1939	0.0168	-2.1301	-2.26722	-2.25909	-2.43604	-2.54974							Training	-2.40522	0.0100914	5.02318
[Ch]Cl-EA (1 : 7)	298.15	651	0	0	0.8781	2.447	3.9194	1.1286	0.6251	0.8928	1.1939	0.0168	-1.8284	-1.90382	-1.91908	-2.00543	-2.05414							Testing	-1.92247	0.00973287	3.44183
[Ch]Cl-EA (1 : 7)	298.15	1010	0	0	0.8781	2.447	3.9194	1.1286	0.6251	0.8928	1.1939	0.0168	-1.7894	-1.73224	-1.74208	-1.76512	-1.81397							Training	-1.65389	0.00948972	2.17447
[Ch]Cl-EA (1 : 7)	298.15	1365	0	0	0.8781	2.447	3.9194	1.1286	0.6251	0.8928	1.1939	0.0168	-1.6922	-1.66	-1.65608	-1.61018	-1.67148							Testing	-1.53742	0.00943953	2.04362
[Ch]Cl-EA (1 : 7)	298.15	1741	0	0	0.8781	2.447	3.9194	1.1286	0.6251	0.8928	1.1939	0.0168	-1.6129	-1.6104	-1.60926	-1.49898	-1.56111							Training	-1.51627	0.00959265	2.00882
[Ch]Cl-EA (1 : 7)	298.15	2035	0	0	0.8781	2.447	3.9194	1.1286	0.6251	0.8928	1.1939	0.0168	-1.5964	-1.56693	-1.58588	-1.43833	-1.49065							Training	-1.53456	0.00986023	1.81336
[TBA]Br-EA (1 : 7)	298.15	381	0	0	0.7233	2.2906	5.7022	2.1151	0.5571	0.8224	1.2075	0.0174	-3.0452	-2.83529	-2.82483	-2.51605	-2.49062							Training	-2.68426	0.00858262	2.23717
[TBA]Br-EA (1 : 7)	298.15	637	0	0	0.7233	2.2906	5.7022	2.1151	0.5571	0.8224	1.2075	0.0174	-2.2855	-2.34548	-2.34961	-2.14392	-2.12749							Training	-2.26559	0.00832347	2.19597
[TBA]Br-EA (1 : 7)	298.15	940	0	0	0.7233	2.2906	5.7022	2.1151	0.5571	0.8224	1.2075	0.0174	-1.7885	-1.97989	-1.99157	-1.89524	-1.93096							Testing	-1.98742	0.00814386	1.83329
[TBA]Br-EA (1 : 7)	298.15	1251	0	0	0.7233	2.2906	5.7022	2.1151	0.5571	0.8224	1.2075	0.0174	-1.6145	-1.73655	-1.74593	-1.7176	-1.80226							Testing	-1.82117	0.00810283	1.99347
[TBA]Br-EA (1 : 7)	298.15	1627	0	0	0.7233	2.2906	5.7022	2.1151	0.5571	0.8224	1.2075	0.0174	-1.5462	-1.54161	-1.5481	-1.56745	-1.67657							Training	-1.72137	0.0082471	1.93165
[TBA]Br-EA (1 : 7)	298.15	2040	0	0	0.7233	2.2906	5.7022	2.1151	0.5571	0.8224	1.2075	0.0174	-1.5141	-1.39059	-1.40287	-1.45853	-1.55278							Testing	-1.6751	0.00865014	1.60932
[TPA]Cl-EA (1 : 7)	298.15	357	0	0	0.7089	2.3624	5.0486	1.7429	0.5507	0.7466	1.1803	0.0562	-2.1026	-2.38467	-2.19542	-2.53262	-2.65156							Testing	-2.60462	0.00914967	4.63017
[TPA]Cl-EA (1 : 7)	298.15	645	0	0	0.7089	2.3624	5.0486	1.7429	0.5507	0.7466	1.1803	0.0562	-1.9469	-1.86132	-1.85271	-2.09433	-2.21776							Training	-2.10483	0.00890711	3.0605
[TPA]Cl-EA (1 : 7)	298.15	952	0	0	0.7089	2.3624	5.0486	1.7429	0.5507	0.7466	1.1803	0.0562	-1.7213	-1.57477	-1.6788	-1.85346	-2.01763							Testing	-1.81285	0.00878564	2.07224
[TPA]Cl-EA (1 : 7)	298.15	1232	0	0	0.7089	2.3624	5.0486	1.7429	0.5507	0.7466	1.1803	0.0562	-1.5897	-1.46193	-1.59471	-1.70026	-1.89892							Testing	-1.65106	0.00879821	2.15838
[TPA]Cl-EA (1 : 7)	298.15	1673	0	0	0.7089	2.3624	5.0486	1.7429	0.5507	0.7466	1.1803	0.0562	-1.5218	-1.48263	-1.53473	-1.53484	-1.75022							Training	-1.53135	0.00905666	2.04708
[TPA]Cl-EA (1 : 7)	298.15	2019	0	0	0.7089	2.3624	5.0486	1.7429	0.5507	0.7466	1.1803	0.0562	-1.503	-1.62241	-1.51552	-1.44947	-1.64721							Testing	-1.4969	0.00946381	1.74403
[TBA]Br-methyldiethanol amine (1 : 7)	303.15	594.5	0	0.00485625	0.469919	3.19092	8.97916	2.74934	0.7177	1.06553	1.56234	0.00370625	-2.1672	-2.21826	-2.2496	-2.20385	-2.09687							Testing	-2.08226	0.00592441	2.31821
[TBA]Br-methyldiethanol amine (1 : 7)	303.15	674.3	0	0.00485625	0.469919	3.19092	8.97916	2.74934	0.7177	1.06553	1.56234	0.00370625	-2.0596	-2.08394	-2.10689	-2.08059	-1.98835							Testing	-1.95707	0.00594284	2.0061
[TBA]Br-methyldiethanol amine (1 : 7)	303.15	723.4	0	0.00485625	0.469919	3.19092	8.97916	2.74934	0.7177	1.06553	1.56234	0.00370625	-1.9661	-2.00861	-2.02555	-2.01032	-1.92785							Testing	-1.88649	0.00595894	1.87733
[TBA]Br-methyldiethanol amine (1 : 7)	303.15	802.5	0	0.00485625	0.469919	3.19092	8.97916	2.74934	0.7177	1.06553	1.56234	0.00370625	-1.8183	-1.89785	-1.9033	-1.90425	-1.83772							Training	-1.7815	0.00599248	1.73327
[TBA]Br-methyldiethanol amine (1 : 7)	303.15	940.7	0	0.00485625	0.469919	3.19092	8.97916	2.74934	0.7177	1.06553	1.56234	0.00370625	-1.6634	-1.73226	-1.71111	-1.73606	-1.69542							Testing	-1.62016	0.00607362	1.84052
[TBA]Br-methyldiethanol amine (1 : 7)	303.15	1034.5	0	0.00485625	0.469919	3.19092	8.97916	2.74934	0.7177	1.06553	1.56234	0.00370625	-1.6165	-1.63743	-1.59235	-1.6324	-1.60628							Testing	-1.5246	0.00614502	1.87589
[MTPP]Br-EA (1 : 7)	298.15	1000	0	0	0.7882	2.7421	4.4691	2.4087	0.5914	0.8315	1.2072	0.0166	-2.0762	-2.1018	-2.08324	-1.94486	-2.07822							Training	-2.05331	0.0112221	1.37937
[MTPP]Br-EA (1 : 8)	298.15	1000	0	0	0.7838	2.6227	4.4167	2.2701	0.595	0.8285	1.1639	0.0169	-2.1295	-2.13617	-2.24759	-1.90954	-2.12936							Testing	-1.87924	0.0112266	1.17211
[ATPP]Br-DEG (1 : 10)	303.15	156	0	0.132041	0.810173	3.38417	6.34045	2.40782	0.902994	1.46463	1.3171	0.00531	-3.5614	-3.61181	-3.59392	-3.53989	-3.5912							Training	-3.73921	0.00252653	3.19657
[ATPP]Br-DEG (1 : 10)	303.15	340	0	0.132041	0.810173	3.38417	6.34045	2.40782	0.902994	1.46463	1.3171	0.00531	-2.763	-2.75536	-2.73221	-2.68917	-2.70041							Training	-2.8621	0.00235335	3.21001
[ATPP]Br-DEG (1 : 10)	303.15	490	0	0.132041	0.810173	3.38417	6.34045	2.40782	0.902994	1.46463	1.3171	0.00531	-2.3655	-2.36219	-2.32119	-2.32993	-2.28906							Training	-2.46321	0.00224977	3.07324
[ATPP]Br-DEG (1 : 10)	303.15	734	0	0.132041	0.810173	3.38417	6.34045	2.40782	0.902994	1.46463	1.3171	0.00531	-1.929	-1.89825	-1.84043	-1.93558	-1.85346							Testing	-2.01847	0.00215343	2.27186
[ATPP]Br-DEG (1 : 10)	303.15	884	0	0.132041	0.810173	3.38417	6.34045	2.40782	0.902994	1.46463	1.3171	0.00531	-1.7142	-1.67852	-1.62779	-1.74331	-1.64603							Training	-1.80337	0.00213857	2.18452
[ATPP]Br-TEG (1 : 10)	303.15	149	0	0	0.061016	5.31264	7.38641	2.6234	1.31572	1.46186	1.26605	0.0224635	-3.52	-3.60825	-3.59438	-3.56348	-3.53667							Testing	-3.6048	0.0071232	2.6273
[ATPP]Br-TEG (1 : 10)	303.15	331	0	0	0.061016	5.31264	7.38641	2.6234	1.31572	1.46186	1.26605	0.0224635	-2.7211	-2.74006	-2.71511	-2.68275	-2.70328							Testing	-2.75313	0.00716013	2.53839
[ATPP]Br-TEG (1 : 10)	303.15	491	0	0	0.061016	5.31264	7.38641	2.6234	1.31572	1.46186	1.26605	0.0224635	-2.2926	-2.31365	-2.29172	-2.29318	-2.30404							Training	-2.35107	0.00723367	2.4906
[ATPP]Br-TEG (1 : 10)	303.15	744	0	0	0.061016	5.31264	7.38641	2.6234	1.31572	1.46186	1.26605	0.0224635	-1.8689	-1.82459	-1.82613	-1.88217	-1.91143							Testing	-1.91415	0.00742837	1.60765
[ATPP]Br-TEG (1 : 10)	303.15	880	0	0	0.061016	5.31264	7.38641	2.6234	1.31572	1.46186	1.26605	0.0224635	-1.6761	-1.62258	-1.63602	-1.70402	-1.74923							Training	-1.71704	0.00757274	1.66867
[ATPP]Br-TEG (1 : 10)	303.15	1080	0	0	0.061016	5.31264	7.38641	2.6234	1.31572	1.46186	1.26605	0.0224635	-1.4529	-1.38736	-1.41068	-1.47596	-1.53554							Training	-1.45892	0.00783548	2.0369
[ATPP]Br-TEG (1 : 10)	303.15	1468	0	0	0.061016	5.31264	7.38641	2.6234	1.31572	1.46186	1.26605	0.0224635	-1.1215	-1.08216	-1.10451	-1.12784	-1.15968							Testing	-1.04472	0.00851643	2.42584
[ATPP]Br-TEG (1 : 10)	303.15	1953	0	0	0.061016	5.31264	7.38641	2.6234	1.31572	1.46186	1.26605	0.0224635	-0.7987	-0.850749	-0.87204	-0.83524	-0.732011							Testing	-0.613865	0.0096854	2.7949
[ATPP]Br-DEG (1 : 16)	303.15	166	0	0.136394	0.814999	3.19923	6.23439	2.12708	0.899496	1.47709	1.26395	0.00354	-3.7423	-3.73283	-3.70935	-3.63936	-3.81924							Testing	-3.73952	0.00351888	2.50072
[ATPP]Br-DEG (1 : 16)	303.15	325	0	0.136394	0.814999	3.19923	6.23439	2.12708	0.899496	1.47709	1.26395	0.00354	-3.0386	-2.9932	-3.01111	-2.90499	-3.05086							Training	-2.99672	0.00336497	2.6695
[ATPP]Br-DEG (1 : 16)	303.15	490	0	0.136394	0.814999	3.19923	6.23439	2.12708	0.899496	1.47709	1.26395	0.00354	-2.5836	-2.56091	-2.61846	-2.5105	-2.58874							Testing	-2.55942	0.00324538	2.47482
[ATPP]Br-DEG (1 : 16)	303.15	742	0	0.136394	0.814999	3.19923	6.23439	2.12708	0.899496	1.47709	1.26395	0.00354	-2.1078	-2.10131	-2.14388	-2.12466	-2.14128							Training	-2.1177	0.0031416	1.87726
[ATPP]Br-DEG (1 : 16)	303.15	880	0	0.136394	0.814999	3.19923	6.23439	2.12708	0.899496	1.47709	1.26395	0.00354	-1.9045	-1.90893	-1.92274	-1.95766	-1.94989							Training	-1.92845	0.00312516	1.72299
[ATPP]Br-DEG (1 : 16)	303.15	1105	0	0.136394	0.814999	3.19923	6.23439	2.12708	0.899496	1.47709	1.26395	0.00354	-1.6337	-1.6599	-1.65097	-1.72394	-1.67105							Training	-1.67855	0.00315966	2.18384
[ATPP]Br-DEG (1 : 16)	303.15	1471	0	0.136394	0.814999	3.19923	6.23439	2.12708	0.899496	1.47709	1.26395	0.00354	-1.2906	-1.37069	-1.36367	-1.42049	-1.26172							Testing	-1.39779	0.00337812	2.61421
[ATPP]Br-TEG (1 : 16)	303.15	146	0	0	0.041144	5.19128	7.31482	2.34977	1.32583	1.47422	1.21122	0.021259	-3.7723	-3.82147	-3.8269	-3.78346	-3.78565							Testing	-3.7346	0.00834411	2.06983
[ATPP]Br-TEG (1 : 16)	303.15	323	0	0	0.041144	5.19128	7.31482	2.34977	1.32583	1.47422	1.21122	0.021259	-2.9701	-2.93869	-2.9313	-2.87035	-2.91819							Training	-2.89896	0.00838124	2.07333
[ATPP]Br-TEG (1 : 16)	303.15	492	0	0	0.041144	5.19128	7.31482	2.34977	1.32583	1.47422	1.21122	0.021259	-2.4937	-2.48034	-2.47633	-2.43919	-2.45492							Training	-2.47075	0.00846058	1.98673
[ATPP]Br-TEG (1 : 16)	303.15	744	0	0	0.041144	5.19128	7.31482	2.34977	1.32583	1.47422	1.21122	0.021259	-2.0333	-1.99262	-2.00561	-2.02165	-2.01875							Training	-2.0334	0.0086585	1.26657
[ATPP]Br-TEG (1 : 16)	303.15	887	0	0	0.041144	5.19128	7.31482	2.34977	1.32583	1.47422	1.21122	0.021259	-1.8245	-1.78087	-1.79969	-1.83348	-1.82862							Training	-1.82442	0.00881322	1.27735
[ATPP]Br-TEG (1 : 16)	303.15	1070	0	0	0.041144	5.19128	7.31482	2.34977	1.32583	1.47422	1.21122	0.021259	-1.5823	-1.56427	-1.58174	-1.62467	-1.61402							Training	-1.58426	0.00905598	1.70407
[ATPP]Br-TEG (1 : 16)	303.15	1471	0	0	0.041144	5.19128	7.31482	2.34977	1.32583	1.47422	1.21122	0.021259	-1.2532	-1.24196	-1.22986	-1.26642	-1.20817							Testing	-1.14167	0.00976369	2.08404
[ATPP]Br-TEG (1 : 16)	303.15	1957	0	0	0.041144	5.19128	7.31482	2.34977	1.32583	1.47422	1.21122	0.021259	-0.885	-1.00174	-0.943298	-0.973556	-0.792838							Testing	-0.686389	0.010945	2.55755
[Ch]Cl-ethylenecyanohydrin (1 : 2)	298.15	110.4	0.001452	0.217668	1.04931	4.68984	2.2988	0.934789	1.25324	1.64179	1.52429	0.001292	-4.7712	-4.73162	-4.75433	-4.70187	-4.63954							Training	-4.90041	0.00365924	1.73942
[Ch]Cl-ethylenecyanohydrin (1 : 2)	298.15	448.1	0.001452	0.217668	1.04931	4.68984	2.2988	0.934789	1.25324	1.64179	1.52429	0.001292	-3.3473	-3.37007	-3.3628	-3.26303	-3.13653							Training	-3.3785	0.00340271	1.72117
[Ch]Cl-ethylenecyanohydrin (1 : 2)	298.15	802.8	0.001452	0.217668	1.04931	4.68984	2.2988	0.934789	1.25324	1.64179	1.52429	0.001292	-2.7962	-2.75565	-2.75977	-2.69041	-2.64745							Training	-2.79339	0.00331759	0.478329
[Ch]Cl-ethylenecyanohydrin (1 : 2)	298.15	1119.4	0.001452	0.217668	1.04931	4.68984	2.2988	0.934789	1.25324	1.64179	1.52429	0.001292	-2.5051	-2.40041	-2.40603	-2.34229	-2.39269							Training	-2.42475	0.00340113	0.863271
[Ch]Cl-ethylenecyanohydrin (1 : 2)	298.15	1407.8	0.001452	0.217668	1.04931	4.68984	2.2988	0.934789	1.25324	1.64179	1.52429	0.001292	-2.2541	-2.18364	-2.17355	-2.11056	-2.20423							Training	-2.21581	0.00360819	1.22674
[Ch]Cl-ethylenecyanohydrin (1 : 2)	328.15	121.9	0.001452	0.217668	1.04931	4.68984	2.2988	0.934789	1.25324	1.64179	1.52429	0.001292	-5.0752	-5.0921	-5.09248	-5.24147	-5.03675							Testing	-5.17991	0.00288254	2.26458
[Ch]Cl-ethylenecyanohydrin (1 : 2)	328.15	408.2	0.001452	0.217668	1.04931	4.68984	2.2988	0.934789	1.25324	1.64179	1.52429	0.001292	-3.8005	-3.91531	-3.88977	-3.98655	-3.78166							Training	-3.85214	0.00255602	2.26196
[Ch]Cl-ethylenecyanohydrin (1 : 2)	328.15	736.2	0.001452	0.217668	1.04931	4.68984	2.2988	0.934789	1.25324	1.64179	1.52429	0.001292	-3.2358	-3.288	-3.28376	-3.34664	-3.29715							Testing	-3.28064	0.00233316	1.18259
[Ch]Cl-ethylenecyanohydrin (1 : 2)	328.15	937.5	0.001452	0.217668	1.04931	4.68984	2.2988	0.934789	1.25324	1.64179	1.52429	0.001292	-3.0241	-3.01009	-3.02279	-3.05488	-3.1234							Training	-3.03795	0.00227636	0.529599
[Ch]Cl-ethylenecyanohydrin (1 : 2)	328.15	1140.2	0.001452	0.217668	1.04931	4.68984	2.2988	0.934789	1.25324	1.64179	1.52429	0.001292	-2.7589	-2.79552	-2.814	-2.80976	-2.97685							Training	-2.85143	0.00228062	0.994989
[Ch]Cl-ethylenecyanohydrin (1 : 2)	328.15	1409.5	0.001452	0.217668	1.04931	4.68984	2.2988	0.934789	1.25324	1.64179	1.52429	0.001292	-2.5699	-2.58542	-2.59696	-2.5509	-2.80015							Testing	-2.69718	0.00238169	1.16709
[Ch]Cl-ethylenecyanohydrin (1 : 3)	298.15	112.5	0.00165	0.24735	0.952237	4.32776	2.1863	1.02764	1.33484	1.66129	1.23759	0.00095	-4.7712	-4.89182	-4.88456	-4.80886	-5.02411							Testing	-5.02955	0.00307577	1.44794
[Ch]Cl-ethylenecyanohydrin (1 : 3)	298.15	404.4	0.00165	0.24735	0.952237	4.32776	2.1863	1.02764	1.33484	1.66129	1.23759	0.00095	-3.5422	-3.60452	-3.59341	-3.47985	-3.5812							Training	-3.59867	0.00281331	1.38581
[Ch]Cl-ethylenecyanohydrin (1 : 3)	298.15	796.9	0.00165	0.24735	0.952237	4.32776	2.1863	1.02764	1.33484	1.66129	1.23759	0.00095	-2.9171	-2.92618	-2.89907	-2.87564	-2.93698							Testing	-2.91318	0.002662	0.00977416
[truncated: 7 more rows]

## Sheet: References
DES (HBA-HBD (molar ratio))				T/(K)	P/(kPa)		Exp.	COSMO-RS	MLR	ANN-ML	Reference
[truncated: 1,973 more rows]

## Sheet: Figure S1
Figure S1:	Chemical structures of hydrogen bond acceptors (HBA) of DESs used in this work

[truncated: 1 more sheets: Figure S2]
